# Supplementary material for: Metabolic co-dependence drives the evolutionarily ancient Hydra–Chlorella symbiosis
Source: eLife. 2018 May 31;7:e35122. doi: 10.7554/eLife.35122 (PMC6019070; doi:10.7554/eLife.35122)
Supplement: Figure 1—source data 1. [file elife-35122-fig1-data1.xlsx]

## Sheet: Fig1D
Source Data: Figure1D
GO distribution of Biological Process in in all contigs (All), up-regulated contigs (Hv_Sym > Hv_Apo) and down-regulated contigs (Hv_Sym < Hv_Apo) in Hv_Sym
GO-term	All	up	down
metabolic process	6348	19	15
single-organism process	5266	17	10
response to stimulus	2599	8	4
localization	2572	9	1
biological regulation	2373	5	3
cellular component organization or biogenesis	2013	2	2
developmental process	1966	1
signaling	1752	5	3
multicellular organismal process	860
multi-organism process	592
immune system process	509
locomotion	443	2
reproduction	440
growth	313
biological adhesion	248
cellular process	7343	24	15
