# Supplementary material for: Metabolic co-dependence drives the evolutionarily ancient Hydra–Chlorella symbiosis
Source: eLife. 2018 May 31;7:e35122. doi: 10.7554/eLife.35122 (PMC6019070; doi:10.7554/eLife.35122)
Supplement: Figure 2—figure supplement 1—source data 1. [file elife-35122-fig2-figsupp1-data1.xlsx]

## Sheet: Fig2
Source Data: Figure2, Figure2 - Figure supplement 1
Differential expression of Hydra genes under influence of Chlorella photosynthesis examined by qPCR
			Sym											Apo
			Relative Expression Level			Ratio		Log2 average		stdev		ttest		Relative Expression Level		Ratio	Log2 average	stdev	ttest
	day	sample	L	D	DMCU	L/D	L/DMCU	L/D	L/DMCU	L/D	L/DMCU	L/D	L/DMCU	L	D	L/D	L/D	L/D	L/D
GS-1	1	1	1	0.523852	0.581686	1.90894	1.71914	0.991931	0.818943	0.0707691	0.109853	0.00302772	0.033316	1	1.12103	0.892039	-0.175289	0.231873	0.331695
1046		2	1.50955	0.718861	0.78542	2.09991	1.92196							0.494692	0.658302	0.751467
		3	1.10218	0.561621	0.66333	1.9625	1.66159							1.25395	1.21025	1.03611
	2	1	1.02691	0.357695	0.488774	2.87091	2.10099	1.3757	0.872115	0.147819	0.173218	0.0107466	0.0185015	0.850947	1.12727	0.754876	-0.165143	0.213325	0.29415
		2	0.809713	0.346166	0.468146	2.33909	1.72962							0.703428	0.702903	1.00075
		3	0.970914	0.373137	0.575382	2.60203	1.68743							1.13733	1.21123	0.93899
	4	1	1.31934	0.459104	0.482696	2.87373	2.73327	1.44588	1.05538	0.0690055	0.355572	0.0530205	0.106086	0.768459	1.15146	0.667379	-0.345188	0.26956	0.155314
		2	0.725748	0.276968	0.428107	2.62033	1.69525							0.66511	0.877346	0.758093
		3	0.693376	0.258233	0.357915	2.68508	1.93727							1.33239	1.38185	0.964205
Spot14	1	1	1	0.873651	0.501159	1.14462	1.99537	0.551483	0.907253	0.322935	0.190738	0.034691	0.0270482	1	1.44498	0.69205	-0.378897	0.330247	0.2106
27417		2	1.70695	1.09886	0.83194	1.55337	2.05176							0.496425	0.755388	0.65718
		3	1.61904	0.914442	1.00479	1.77052	1.61131							2.22927	2.22927	1
	2	1	1.29205	0.459355	0.253901	2.81275	5.08879	1.03033	1.54893	0.509359	0.736061	0.0667652	0.0307464	1.3857	2.09137	0.662579	-0.511221	0.259953	0.154969
		2	1.00404	0.717934	0.379893	1.39852	2.64297							0.370933	0.610921	0.607171
		3	1.35908	0.627433	0.72967	2.1661	1.8626							1.06184	1.23677	0.858565
	4	1	1.52003	0.625372	0.254052	2.4306	5.98313	1.13073	1.92109	0.23916	0.580303	0.0469931	0.0576212	0.745889	1.2819	0.581864	-0.694909	0.388993	0.00548447
		2	0.96149	0.53159	0.297499	1.80871	3.23191							0.465617	0.953098	0.48853
		3	0.934173	0.391166	0.33258	2.38818	2.80887							2.00913	2.42263	0.82932
NaPi	1	1	1	0.588489	0.32909	1.69927	3.03868	0.887771	1.34968	0.170564	0.26381	0.00372626	0.00527819	1	1.1549	0.865879	-0.122447	0.110233	0.214155
26218		2	0.849313	0.48246	0.328879	1.76038	2.58245							0.794612	0.888791	0.894036
		3	1.13183	0.534458	0.536555	2.11772	2.10944							1.65367	1.65136	1.0014
	2	1	0.848603	0.464876	0.40655	1.82544	2.08733	0.949017	1.22161	0.0979085	0.182767	0.0134662	0.0127703	1.27552	1.26717	1.00659	-0.12048	0.113223	0.227683
		2	1.03555	0.546958	0.386781	1.8933	2.67736							1.00621	1.13442	0.886977
		3	1.11648	0.536275	0.491956	2.08191	2.26947							1.45432	1.66812	0.871833
	4	1	0.761036	0.568638	0.479742	1.33835	1.58634	0.565045	0.670703	0.244398	0.257401	0.0580267	0.0477057	1.13698	1.3193	0.861801	-0.234016	0.0876401	0.00557899
		2	0.705019	0.524231	0.528471	1.34486	1.33407							0.911987	1.14618	0.795677
		3	0.843891	0.46908	0.442749	1.79903	1.90603							1.71323	1.91117	0.896435
Sym-１	1	1	1	0.615158	0.698603	1.6256	1.43143	0.562289	0.522156	0.18729	0.115816	0.0110215	0.0386507	1	0.951737	1.05071	-0.243223	0.285974	0.350901
12891		2	1.11946	0.720039	0.718249	1.55472	1.5586							0.647793	0.908181	0.713286
		3	0.778455	0.611087	0.586387	1.27389	1.32755							0.455027	0.565505	0.804639
	2	1	0.613646	0.341377	0.643677	1.79756	0.953345	0.690911	0.343005	0.13486	0.362705	0.00296497	0.231297	0.957436	1.12191	0.853398	-0.128198	0.148677	0.254357
		2	0.942115	0.620876	0.673843	1.5174	1.39812							0.867305	0.995219	0.871472
		3	0.78358	0.508056	0.511817	1.54231	1.53098							0.750167	0.728346	1.02996
	4	1	0.917969	0.667125	1.06131	1.37601	0.864936	0.504638	0.00808804	0.0417626	0.22165	0.0203248	0.835077	1.25358	1.05962	1.18305	0.0763837	0.170992	0.56756
		2	0.999479	0.685742	0.999573	1.45752	0.999906							1.12737	1.20753	0.933621
		3	0.631205	0.443272	0.536796	1.42397	1.17588							0.820475	0.77314	1.06123
Sym-２	1	1	1	1.10942	1.3834	0.901368	0.722858	-0.0211718	-0.195964	0.14233	0.290362	0.477338	0.354595	1	1.15157	0.868376	-0.610768	0.37888	0.0121349
13579		2	1.03441	1.0675	0.958717	0.968999	1.07895							0.37567	0.600096	0.626016
		3	0.973275	0.888344	1.14094	1.09561	0.853046							0.208005	0.402667	0.516568
	2	1	0.809356	0.320344	0.914738	2.52652	0.884795	0.387191	0.00568475	0.851916	0.186681	0.585581	0.961964	0.652785	1.05864	0.616625	-0.548272	0.194743	0.0734744
		2	0.793251	0.982731	0.794818	0.807191	0.998029							0.627052	0.787113	0.796648
		3	0.921569	0.840153	0.804229	1.09691	1.1459							0.398588	0.612281	0.650989
	4	1	1.3807	0.555933	1.21788	2.48357	1.13369	0.766222	0.164724	0.473403	0.0427581	0.173166	0.0759406	1.10708	1.39734	0.792279	-0.510481	0.151445	0.022961
		2	0.71551	0.515152	0.660135	1.38893	1.08389							0.609683	0.916908	0.664933
		3	0.79234	0.555522	0.691242	1.4263	1.14626							0.343848	0.52364	0.65665
Death-1	1	1	1	0.706216	1.416	0.219726	0.564303	0.592876
2417		2	1.17275	0.780533	1.5025
		3	0.823428	1.10935	0.742262
	2	1	0.448195	0.446336	1.00417	0.170566	0.570925	0.509455
		2	3.13015	1.79071	1.74799
		3	0.829156	1.02081	0.812252
	4	1	0.983255	1.18288	0.831241	-0.451606	0.181758	0.0638423
		2	1.20448	1.65469	0.727915
		3	1.02791	1.59076	0.646176
TIR	1	1	1	1.10328	0.90639	0.0759564	0.396838	0.752614
5165		2	1.1609	1.30096	0.89234
		3	1.455	1.00488	1.44794
	2	1	0.494711	0.531128	0.931435	-0.284526	0.228617	0.170016
		2	0.854719	1.24369	0.687243
		3	1.38609	1.60327	0.864537
	4	1	0.914386	1.3765	0.664282	-0.293307	0.257088	0.165109
		2	0.938987	1.04102	0.901989
		3	1.52734	1.68411	0.90691
Death-2	1	1	1	0.701852	1.4248	0.102706	0.366905	0.873311
6508		2	1.40285	1.40542	0.998171
		3	1.44537	1.6603	0.870551
	2	1	0.703409	0.598472	1.17534	-0.0547919	0.381466	0.698775
		2	1.18173	1.65675	0.713282
		3	1.81686	1.70698	1.06437
	4	1	1.34839	1.63684	0.82378	-0.217996	0.0599224	0.0233864
		2	1.48465	1.72244	0.861949
		3	1.40585	1.57073	0.895029
PRKRIR	1	1	1	1.0255	0.975136	-0.0760572	0.188392	0.527519
9338		2	1.02029	0.95905	1.06385
		3	1.10471	1.3424	0.822937
	2	1	0.974568	0.966225	1.00864	-0.235216	0.224545	0.230965
		2	0.831383	1.0182	0.81652
		3	1.01833	1.36777	0.744523
	4	1	1.05592	1.32947	0.794236	-0.352064	0.0171048	0.013468
		2	1.35654	1.74192	0.778761
		3	0.970387	1.24809	0.7775
CLEC	1	1	1	0.709087	1.41026	0.391583	0.105209	0.0161213
11411		2	0.942091	0.717336	1.31332
		3	1.04619	0.858318	1.21889
	2	1	0.435608	0.487887	0.892845	0.306887	0.664729	0.453579
		2	1.55009	0.739694	2.09559
		3	0.907796	0.897272	1.01173
	4	1	0.553027	0.8589	0.643879	-0.278676	0.397943	0.335714
		2	0.661872	0.596235	1.11009
		3	0.611418	0.780133	0.783736
PRRT1	1	1	1	0.937325	1.06687	0.319919	0.612501	0.475092
24563		2	1.58026	0.782814	2.01869
		3	1.15722	1.28138	0.903102
	2	1	0.868833	0.488956	1.77691	0.419974	0.562452	0.427217
		2	1.069	0.680352	1.57124
		3	1.17908	1.37461	0.857759
	4	1	0.703276	0.740147	0.950184	0.0445395	0.602256	0.846509
		2	0.645459	0.398111	1.6213
		3	0.786706	1.10474	0.712117
ephrinR	1	1	1	0.859181	1.1639	-0.0400026	0.23187	0.723246
26108		2	0.940489	1.01544	0.926187
		3	1.06015	1.24195	0.853611
	2	1	0.498644	0.836484	0.59612	-0.203451	0.509403	0.670566
		2	0.916445	1.00155	0.915025
		3	1.16636	0.971257	1.20088
	4	1	0.77889	1.02446	0.760292	-0.00804894	0.457842	0.850264
		2	0.699547	0.76339	0.916369
		3	0.761424	0.539444	1.4115
