# Supplementary material for: Metabolic co-dependence drives the evolutionarily ancient Hydra–Chlorella symbiosis
Source: eLife. 2018 May 31;7:e35122. doi: 10.7554/eLife.35122 (PMC6019070; doi:10.7554/eLife.35122)
Supplement: Figure 3—figure supplement 2—source data 1. [file elife-35122-fig3-figsupp2-data1.xlsx]

## Sheet: Fig3-FigSup2
Source Data: Figure3 - Figure Supplement 2
Eff_x001F_ects in presence of maltose, glucose, sucrose and galactose on gene expression of GS-1, Spot14 and NaPi in Hv_Apo examined by qPCR
48 hours treatment (Fold change: Sugar treatment /Control)
Gene Name	conc.(mM)	maltose						glucose						scrose						galactose
		Fold Change				T-test	Kruskal-Wallis test	Fold Change				T-test	Kruskal-Wallis test	Fold Change				T-test	Kruskal-Wallis test	Fold Change				T-test	Kruskal-Wallis test
		sample1	sample2	sample3	average			sample1	sample2	sample3	average			sample1	sample2	sample3	average			sample1	sample2	sample3	average
GS	10	1.84365	1.50474	1.46953	1.59749	0.0366267	0.01958	1.12923	1.466	1.29716	1.29014	0.0922662	0.04704	0.90485	0.877466	1.18128	0.978859	0.91192	0.406	1.79465	1.5856	2.48002	1.91812	0.07174	0.02134
	25	1.69647	1.4538	1.76584	1.63305	0.0212391		1.33211	1.22346	1.26169	1.27163	0.0133697		0.989962	0.830604	1.32441	1.02883	0.771373		1.36826	1.64784	2.36256	1.74645	0.115712
	50	2.46134	1.98235	2.66725	2.35219	0.0212258		1.86051	1.04147	1.87951	1.53853	0.16457		0.948934	0.804024	0.61147	0.77558	0.162495		1.48577	1.05544	1.4493	1.31477	0.138767
	75	3.0286	2.94921	1.82811	2.53698	0.0538575		2.20159	1.7137	1.68221	1.85147	0.0356978		1.2422	0.829813	0.385647	0.735283	0.540849		3.20918	2.3656	1.77746	2.38074	0.0180825
Spot14	10	1.32142	1.37024	1.04269	1.23594	0.138522	0.04972	1.63818	0.795219	0.712176	0.975315	0.884777	0.01903	0.567263	0.357106	0.524969	0.473775	0.0150676	0.0342	1.92798	1.79555	1.53188	1.74385	0.0231492	0.04075
	25	2.05209	1.82693	0.855776	1.47489	0.255837		1.52847	1.50465	1.39021	1.47319	0.00799318		0.695967	0.506777	0.526792	0.570622	0.0194924		1.66681	2.02711	1.16498	1.57892	0.131433
	50	2.84236	4.27056	1.48484	2.62189	0.146129		1.98218	1.89793	2.94916	2.23036	0.0632566		0.481995	0.540334	0.592672	0.536422	0.00475981		1.92798	2.86677	1.91893	2.19711	0.0588835
	75	3.04637	7.91409	1.9935	3.6358	0.210446		4.17591	3.92971	3.45888	3.84311	0.0053851		0.753715	0.659491	0.63521	0.680943	0.0127348		1.23293	0.907157	1.32437	1.13993	0.34595
NaPi	10	0.858189	0.700217	1.42206	0.948952	0.978988	0.03003	0.972228	0.854138	1.31765	1.03046	0.762867	0.05709	1.21366	0.72491	0.668929	0.838019	0.528444	0.1894	0.967746	1.39398	1.13265	1.15179	0.315452	0.5266
	25	1.08626	0.766243	1.69073	1.12062	0.572878		0.621015	1.19682	1.60847	1.06132	0.668906		1.13239	0.74357	0.822719	0.884822	0.486346		0.592971	1.03231	0.937807	0.831098	0.389247
	50	1.95346	1.72812	2.23188	1.96043	0.0217729		1.40708	1.05644	2.33739	1.5146	0.256847		0.842472	0.668596	0.796474	0.765533	0.047216		0.898776	1.69256	1.08344	1.18123	0.447306
	75	3.51299	4.63491	1.79438	3.07995	0.107291		4.00749	2.51846	3.60564	3.31383	0.033268		1.20807	1.22763	0.857951	1.08361	0.500681		0.963284	1.13226	1.00229	1.03014	0.588547
6 hours treatment in 75mM maltose and glucose (Fold change: Sugar treatment /Control)
Gene Name		maltose					glucose
		Fold Change				T-test	Fold Change				T-test
		sample1	sample2	sample3	average		sample1	sample2	sample3	average
GS		0.711816	1.35444	0.566528	0.817429	0.117198	1.12116	1.37189	1.41174	1.29494	0.0103452
Spot14		0.856101	1.48873	1.20081	1.15241	0.0452944	1.66045	1.77618	1.44103	1.6198	0.00959067
NaPi		1.83584	2.16847	1.70056	1.89173	0.0176665	3.04519	3.66592	2.84577	3.16713	0.0381563
