# Supplementary material for: Metabolic co-dependence drives the evolutionarily ancient Hydra–Chlorella symbiosis
Source: eLife. 2018 May 31;7:e35122. doi: 10.7554/eLife.35122 (PMC6019070; doi:10.7554/eLife.35122)
Supplement: Figure 3—source data 1. [file elife-35122-fig3-data1.xlsx]

## Sheet: Sheet1
Source Data: Figure3
Expression change of genes GS-1, Spot14, NaPi, Sym-1 and Sym-2 following exposure to 25mM, 50mM and 100mM maltose in Hv_Apo examined by qPCR
Gene Name	conc.(mM)	Relative Expression Level				stdev	T-test	Kruskal-Wallis test
		sample1	sample2	sample3	average
GS	0	0.742371	1	0.867694	0.870021	0.12883		0.03069
	25	1.14243	1.44084	1.3059	1.29639	0.149435	0.000953908
	50	1.38333	1.56649	1.19892	1.38291	0.183788	0.0315625
	100	1.49599	1.62095	1.7867	1.63454	0.14583	0.0124792
Spot14	0	0.784182	1	0.900649	0.894944	0.108022		0.01879
	25	1.35646	1.78346	1.41769	1.51921	0.230891	0.0164939
	50	1.8899	2.09781	2.63696	2.20822	0.385578	0.0249757
	100	2.16359	3.0703	2.9677	2.73387	0.496526	0.015254
NaPi	0	0.859805	1	0.701745	0.85385	0.149217		0.07028
	25	1.07038	0.888719	0.914438	0.957847	0.0983037	0.435901
	50	1.052	0.907092	0.832911	0.930667	0.11143	0.468961
	100	1.16509	2.56012	1.45757	1.72759	0.735675	0.140251
Sym-1	0	0.751555	1	1.31409	1.02188	0.281906		0.516
	25	0.78025	1.31154	1.35189	1.14789	0.319028	0.307407
	50	1.10827	1.36246	1.5375	1.33608	0.215832	0.0202657
	100	0.928137	1.17002	1.5542	1.21745	0.315716	0.0128097
Sym-2	0	0.836011	1	0.740709	0.858907	0.131153		0.8629
	25	1.12373	0.817189	0.673114	0.871343	0.230136	0.938017
	50	1.11053	0.950542	0.685659	0.915578	0.214584	0.654767
	100	0.989442	0.779942	1.25444	1.00794	0.237791	0.554598
