# Supplementary material for: Metabolic co-dependence drives the evolutionarily ancient Hydra–Chlorella symbiosis
Source: eLife. 2018 May 31;7:e35122. doi: 10.7554/eLife.35122 (PMC6019070; doi:10.7554/eLife.35122)
Supplement: Figure 5—source data 1. [file elife-35122-fig5-data1.xlsx]

## Sheet: GO_geneloss
Source Data: Figure5
Sequences per GO terms (Multilevel Pie): This function generates a Pie with the lowest node per branch of the directed acyclic graphs (DAG) that fulfills the filter condition., e.g. will find all the lowest nodes with the given number of sequences or Score value and will plot them jointly in a Pie representation.
biological process
C169 All		A99 gene loss
GO-term	#Seq	GO-term	#Seq
biosynthetic process	1293	biosynthetic process	20
nucleobase-containing compound metabolic process	1112	nucleobase-containing compound metabolic process	17
cellular protein modification process	621	protein metabolic process	10
single-organism process	603	single-organism process	8
response to stimulus	447	response to stimulus	8
cellular component organization	444	cellular component organization	9
		transport	14
molecular function
C169 All		A99 gene loss
GO-term	#Seq	GO-term	#Seq
hydrolase activity	1245	hydrolase activity	16
transferase activity	1153	transferase activity	20
nucleotide binding	1152
protein binding	1138	protein binding	34
nucleic acid binding	886	nucleic acid binding	11
		transporter activity	14
