# Supplementary material for: Metabolic co-dependence drives the evolutionarily ancient Hydra–Chlorella symbiosis
Source: eLife journal article supplement (doi:10.7554/elife.35122), 2018-05-31
Supplement: supp [file elife_poa_e35122_Table_2_and_Table_4_source_data_1.xlsx]

## Sheet: Table1-2
Source Data: Table 2, Table4
Expression level examined by microarray and qPCR
		Relative Expression Level
Sym>Apo, NC64A		sample1	sample2	sample3	average	fold change(vs Sym)	ttest pvalue
rc13579	Sym	1	1.24833	1.01396	1.08743
	NC64A	0.493116	0.167241	0.15822	0.272859	3.98532	0.00521133
	Apo	0.150726	0.0883883	0.0511189	0.0967444	11.2402	0.00304332
rc_12891	Sym	1	0.773782	0.806642	0.860141
	NC64A	0.460094	0.376312	0.376312	0.404239	2.1278	0.0135709
	Apo	0.0890031	0.0532897	0.0344345	0.0589091	14.6012	0.00564733
27417	Sym	1	1.89212	1.24833	1.38015
	NC64A	0.752623	0.271684	0.371131	0.465146	2.96713	0.0543782
	Apo	0.438303	0.539614	0.403321	0.460413	2.99763	0.0711213
rc_26218	Sym	1	1.87905	1.03526	1.30477
	NC64A	0.5	0.68302	0.510506	0.564509	2.31134	0.117938
	Apo	0.423373	0.554785	0.61132	0.529826	2.46264	0.109418
1046	Sym	1	1.27456	1.39474	1.2231
	NC64A	1.10957	0.482968	0.432269	0.674935	1.81218	0.11144
	Apo	0.712025	0.426317	0.476319	0.538221	2.27249	0.0112414
Sym<Apo, NC64A
NPNHRC_26859	Sym	nd	nd	nd	na
	NC64A	1.04972	0.384219	0.444421	0.626119	na	na
	Apo	2.21914	2.80889	1.89212	2.30671	na	na
	Sym	1	1.12506	1.08673	1.0706
RC_FVQRUGK01AXSJ	NC64A	1.81504	1.3566	1.6358	1.60248	1.49681	0.0488497
	Apo	2.41162	1.84038	2.60268	2.28489	2.13422	0.0310403
rc_14793	Sym	1	1.31951	1.12506	1.14819
	NC64A	7.83536	2.88786	5.9794	5.56754	4.84898	0.091512
	Apo	6.10504	6.86852	19.5622	10.8453	9.44554	0.156312
FV81RT002HT2FL	Sym	1	1.82766	1.52626	1.45131
	NC64A	1.98618	2.65737	2.9897	2.54442	1.75319	0.0478079
	Apo	3.605	5.46416	4.28709	4.45209	3.06764	0.0182215
NPNHRC_12201	Sym	1	0.835088	1.06437	0.966486
	NC64A	2.08493	1.91853	3.34035	2.44794	2.53282	0.0776107
	Apo	2.20381	2.62079	2.65737	2.49399	2.58047	0.00308084
Sym>Apo
5168	Sym	1	0.768438	0.846745	0.871728
	NC64A	0.823591	0.482968	0.602904	0.636488	1.36959	0.132592
	Apo	0.190782	0.0927827	0.0703162	0.11796	7.39	0.00203706
6508	Sym	1	1.02101	1.48452	1.16851
	NC64A	1.81504	1.37554	1.16473	1.45177	0.804887	0.319881
	Apo	0.598739	0.336808	0.293209	0.409585	2.85291	0.0218625
11411	Sym	1	0.360982	0.456916	0.605966
	NC64A	2.02792	0.217638	0.239816	0.828458	0.731439	0.752966
	Apo	0.521233	0.194791	0.189465	0.30183	2.00764	0.270047
26108	Sym	1	0.790041	0.496546	0.762196
	NC64A	0.493116	0.381565	0.181747	0.352143	2.16445	0.0882709
	Apo	0.179244	0.102949	0.0332616	0.105152	7.24854	0.0374103
rc_2417	Sym	1	0.678302	0.840896	0.839733
	NC64A	0.747425	0.692555	1.02101	0.82033	1.02365	0.894761
	Apo	0.295248	0.244855	0.174343	0.238149	3.52609	0.0140258
rc_24563	Sym	1	0.438303	0.586417	0.674907
	NC64A	1.42405	0.641713	0.441351	0.835705	0.80759	0.670431
	Apo	0.144586	0.0953912	0.0836205	0.107866	6.25691	0.0760073
rc_9398	Sym	1	0.607097	0.61132	0.739473
	NC64A	0.607097	0.438303	0.646176	0.563859	1.31145	0.315171
	Apo	0.167241	0.137738	0.103665	0.136215	5.42873	0.0412456
Sym<Apo
rc_10789	Sym	1	0.514057	0.641713	0.71859
	NC64A	1.59107	0.68302	0.933033	1.06904	1.48769	0.33545
	Apo	2.54912	2.73208	2.62079	2.634	3.66551	0.00251636
rc_12826	Sym	1	0.409433	0.58513	0.664854
	NC64A	1.4138	0.438211	0.574404	0.808805	1.21652	0.708284
	Apo	1.50859	1.47561	1.60836	1.53085	2.30253	0.0331359
rc_8898	Sym	1	0.539614	0.178006	0.57254
	NC64A	2.54912	0.641713	0.90125	1.36403	2.38242	0.317296
	Apo	2.96905	1.86607	2.15846	2.33119	4.07166	0.0152442
FV81RT001CSTY	Sym	1	1.09429	0.702222	0.932172
	NC64A	1.59107	1.18921	1.05702	1.2791	1.37217	0.163126
	Apo	1.8025	1.69349	2.04202	1.84601	1.98033	0.0045638
RSASM_17752	Sym	1	0.692555	1.1487	0.947084
	NC64A	1.02101	1.29235	1.14076	1.15138	1.21571	0.274775
	Apo	1.7411	2	2.15846	1.96652	2.07639	0.00505364
