# Supplementary material for: Metabolic co-dependence drives the evolutionarily ancient Hydra–Chlorella symbiosis
Source: eLife. 2018 May 31;7:e35122. doi: 10.7554/eLife.35122 (PMC6019070; doi:10.7554/eLife.35122)
Supplement: Supplementary file 3. [file elife-35122-supp3.xlsx]

## Sheet: Sheet1
Supplementary File 3
List of Coccomyxa subellipsoidea C169 (C169) and their BLAST best hit genes in Chlamydomonas reinhardtii (Cr), Volvox carteri (Vc) and Chlorella A99 (A99) gene model and genome scaffolds.
C169_Uniprot_ID	C169_gene name	C169_Blast2GO Description	C169_GO Names list	C169 Enzyme Codes list	C169 InterPro IDs	Cr_ID	Cr_gene name	Cr_evalue	Vc_ID	Vc_evalue	A99_genemodel	A99genemodel_evalue	A99genome_ID	A99genome_evalue
E9NPR9_9CHLO	Photosystem II protein D1	D1 reaction center of photosystem II (chloroplast)	P:generation of precursor metabolites and energy; F:catalytic activity; C:membrane; P:photosynthesis; F:binding; C:plastid; C:thylakoid		IPR000484 (PRINTS); IPR005867 (TIGRFAM); IPR000484 (PFAM); IPR000484 (G3DSA:1.20.85.GENE3D); PTHR33149 (PANTHER); PTHR33149:SF4 (PANTHER); IPR005867 (HAMAP); IPR000484 (SUPERFAMILY)	sp|P07753|PSBA_CHLRE	Photosystem II protein D1	0	tr|D0VMW3|D0VMW3_VOLCA	0			scaffold41_size205970	0
E9NPS0_9CHLO	Photosystem II reaction center protein I	---NA---	C:membrane; P:photosynthesis; C:thylakoid		IPR003686 (PFAM); PTHR35772 (PANTHER); PTHR35772:SF1 (PANTHER); IPR003686 (HAMAP); SSF161041 (SUPERFAMILY)	sp|P59763|PSBI_CHLRE	Photosystem II reaction center protein I	6e-15	tr|D0VMZ4|D0VMZ4_VOLCA	7e-15
E9NPS1_9CHLO	ATP-dependent Clp protease proteolytic subunit	proteolytic subunit 2 of clp protease (chloroplast)	P:protein metabolic process; C:plastid; F:hydrolase activity	EC:3.4.21	IPR001907 (PRINTS); IPR029045 (G3DSA:3.90.226.GENE3D); IPR023562 (PFAM); IPR023562 (PANTHER); PTHR10381:SF17 (PANTHER); IPR001907 (HAMAP); IPR029045 (SUPERFAMILY)	tr|A8IL21|A8IL21_CHLRE	ATP-dependent Clp protease proteolytic subunit	3e-55	tr|D8TPD1|D8TPD1_VOLCA	7e-54	scaffold13.g393.t1	3e-64	scaffold41_size205970	1e-108
E9NPS2_9CHLO	Photosystem II CP43 reaction center protein (Fragment)	CP43 chlorophyll apo of photosystem II (chloroplast)	P:generation of precursor metabolites and energy; C:membrane; P:cellular protein modification process; P:photosynthesis; F:binding; C:plastid; C:thylakoid		IPR005869 (TIGRFAM); IPR000932 (PFAM); G3DSA:1.10.10.670 (GENE3D); PTHR33180:SF2 (PANTHER); PTHR33180 (PANTHER); IPR005869 (HAMAP); IPR000932 (SUPERFAMILY)	sp|P10898|PSBC_CHLRE	Photosystem II CP43 reaction center protein	0	tr|D0VMT9|D0VMT9_VOLCA	0			scaffold41_size205970	0
E9NPS3_9CHLO	Photosystem II D2 protein	D2 reaction center of photosystem II (chloroplast)	P:generation of precursor metabolites and energy; F:catalytic activity; C:membrane; P:cellular protein modification process; P:photosynthesis; F:binding; C:plastid; C:thylakoid		IPR000484 (PRINTS); IPR000484 (G3DSA:1.20.85.GENE3D); IPR000484 (PFAM); IPR000484 (G3DSA:1.20.85.GENE3D); IPR005868 (TIGRFAM); PTHR33149 (PANTHER); IPR005868 (HAMAP); IPR000484 (SUPERFAMILY)	sp|P06007|PSBD_CHLRE	Photosystem II D2 protein	0	tr|D0VMT7|D0VMT7_VOLCA	0			scaffold41_size205970	0
E9NPS4_9CHLO	ATP synthase CF1 epsilon subunit	CF1 epsilon subunit of ATP synthase (chloroplast)	F:nucleotide binding; P:generation of precursor metabolites and energy; P:biosynthetic process; P:nucleobase-containing compound metabolic process; C:plasma membrane; C:plastid; F:transporter activity; C:thylakoid; F:hydrolase activity	EC:3.6.1; EC:3.6.1.3; EC:3.6.1.15	IPR020546 (G3DSA:2.60.15.GENE3D); IPR001469 (TIGRFAM); IPR020547 (PFAM); IPR020546 (PFAM); PTHR13822:SF8 (PANTHER); IPR001469 (PANTHER); IPR020546 (PRODOM); IPR001469 (HAMAP); IPR020546 (SUPERFAMILY)	sp|P07891|ATPE_CHLRE	ATP synthase epsilon chain, chloroplastic OS=Chlamydomonas reinhardtii GN=atpE PE=1 SV=4	8e-53	tr|D0VMX1|D0VMX1_VOLCA	1e-52			scaffold41_size205970	3e-60
E9NPS5_9CHLO	ATP synthase subunit beta	CF1 beta subunit of ATP synthase (chloroplast)	F:nucleotide binding; P:biosynthetic process; P:nucleobase-containing compound metabolic process; C:plasma membrane; C:plastid; F:transporter activity; C:thylakoid; F:hydrolase activity	EC:3.6.1; EC:3.6.1.3; EC:3.6.1.15	IPR003593 (SMART); IPR027417 (G3DSA:3.40.50.GENE3D); IPR024034 (G3DSA:1.10.1140.GENE3D); IPR005722 (TIGRFAM); IPR004100 (PFAM); G3DSA:2.40.10.170 (GENE3D); IPR000194 (PFAM); PTHR15184:SF43 (PANTHER); PTHR15184 (PANTHER); IPR005722 (HAMAP); IPR004100 (SUPERFAMILY); IPR000793 (SUPERFAMILY); IPR027417 (SUPERFAMILY)	sp|P06541|ATPB_CHLRE	ATP synthase subunit beta, chloroplastic OS=Chlamydomonas reinhardtii GN=atpB PE=1 SV=3	0	tr|D0VMT0|D0VMT0_VOLCA	0	scaffold36.g5067.t1	1e-106	scaffold41_size205970	0
E9NPS6_9CHLO	Photosystem I assembly protein Ycf4	hypothetical chloroplast RF4 (chloroplast)	C:membrane; P:photosynthesis; C:plastid; C:thylakoid		IPR003359 (PFAM); PTHR33288 (PANTHER); IPR003359 (PRODOM); IPR003359 (HAMAP)	sp|O20030|YCF4_CHLRE	Photosystem I assembly protein Ycf4	7e-75	tr|D0VMW7|D0VMW7_VOLCA	5e-73			scaffold41_size205970	3e-61
E9NPS7_9CHLO	Photosystem I P700 chlorophyll a apoprotein A1	P700 apo A1 of photosystem I (chloroplast)	F:catalytic activity; C:membrane; P:cellular protein modification process; P:photosynthesis; F:binding; C:plastid; C:thylakoid		IPR001280 (PRINTS); IPR001280 (PIRSF); IPR001280 (G3DSA:1.20.1130.GENE3D); IPR001280 (PFAM); IPR006243 (TIGRFAM); PTHR30128:SF8 (PANTHER); PTHR30128 (PANTHER); IPR006243 (HAMAP); IPR001280 (SUPERFAMILY)	sp|P12154|PSAA_CHLRE	Photosystem I P700 chlorophyll a apoprotein A1 OS=Chlamydomonas reinhardtii GN=psaA PE=1 SV=3	0	tr|D0VMT6|D0VMT6_VOLCA	0			scaffold41_size205970	0
E9NPS8_9CHLO	Photosystem I P700 chlorophyll a apoprotein A2	P700 apo A2 of photosystem I (chloroplast)	F:catalytic activity; C:membrane; P:cellular protein modification process; P:photosynthesis; F:binding; C:plastid; C:thylakoid		IPR001280 (PRINTS); IPR001280 (PIRSF); IPR001280 (PFAM); IPR001280 (G3DSA:1.20.1130.GENE3D); IPR006244 (TIGRFAM); PTHR30128:SF7 (PANTHER); PTHR30128 (PANTHER); IPR006244 (HAMAP); IPR001280 (SUPERFAMILY)	sp|P09144|PSAB_CHLRE	Photosystem I P700 chlorophyll a apoprotein A2 OS=Chlamydomonas reinhardtii GN=psaB PE=1 SV=4	0	tr|D0VMY8|D0VMY8_VOLCA	0			scaffold41_size205970	0
E9NPS9_9CHLO	Light-independent protochlorophyllide reductase subunit N	subunit of protochlorophyllide reductase (chloroplast)	F:nucleotide binding; P:carbohydrate metabolic process; F:catalytic activity; P:photosynthesis; P:biosynthetic process; C:plastid		IPR005970 (PIRSF); IPR000510 (PFAM); G3DSA:3.40.50.1980 (GENE3D); IPR005970 (TIGRFAM); G3DSA:3.40.50.1980 (GENE3D); PTHR39429 (PANTHER); PTHR39429:SF1 (PANTHER); IPR005970 (HAMAP); SSF53807 (SUPERFAMILY)	sp|P29683|CHLN_CHLRE	Light-independent protochlorophyllide reductase subunit N	0	tr|D0VMZ9|D0VMZ9_VOLCA	0			scaffold41_size205970	0
E9NPT0_9CHLO	Light-independent protochlorophyllide reductase iron-sulfur ATP-binding protein	ATP-binding subunit of protochlorophyllide reductase (chloroplast)	F:nucleotide binding; P:carbohydrate metabolic process; F:catalytic activity; P:photosynthesis; P:biosynthetic process; C:plastid		IPR000392 (PRINTS); IPR000392 (PIRSF); IPR005971 (TIGRFAM); IPR027417 (G3DSA:3.40.50.GENE3D); PF00142 (PFAM); PTHR13696:SF74 (PANTHER); PTHR13696 (PANTHER); IPR005971 (HAMAP); IPR000392 (PROSITE_PROFILES); IPR027417 (SUPERFAMILY)	sp|Q00469|CHLL_CHLRE	Light-independent protochlorophyllide reductase iron-sulfur ATP-binding protein	2e-165	tr|D0VMV2|D0VMV2_VOLCA	5e-163			scaffold41_size205970	4e-157
E9NPT1_9CHLO	Ribosomal protein S2	ribosomal S2 (chloroplast)	F:structural molecule activity; C:ribosome; C:plastid; P:translation		IPR001865 (PRINTS); IPR005706 (TIGRFAM); IPR001865 (PFAM); G3DSA:1.10.287.610 (GENE3D); G3DSA:3.40.50.10490 (GENE3D); IPR005706 (PANTHER); IPR005706 (HAMAP); IPR023591 (SUPERFAMILY)	sp|Q8HUH1|RR2B_CHLRE	Putative 30S ribosomal S2-like protein	5e-29	tr|D0VMW4|D0VMW4_VOLCA	2e-26			scaffold41_size205970	1e-76
E9NPT2_9CHLO	Ribosomal protein L12	ribosomal L12 (chloroplast)	F:structural molecule activity; C:ribosome; C:plastid; P:translation		IPR008932 (PFAM); IPR000206 (TIGRFAM); G3DSA:1.20.5.710 (GENE3D); IPR014719 (G3DSA:3.30.1390.GENE3D); IPR013823 (PFAM); IPR013823 (PRODOM); IPR000206 (HAMAP); IPR008932 (SUPERFAMILY); IPR014719 (SUPERFAMILY)	tr|A8HTY0|A8HTY0_CHLRE	Plastid ribosomal protein L7/L12	4e-34	tr|D8TQZ8|D8TQZ8_VOLCA	6e-37			scaffold41_size205970	9e-19
E9NPT3_9CHLO	Ribosomal protein S9	ribosomal S9 (chloroplast)	F:structural molecule activity; C:ribosome; C:plastid; P:translation		IPR014721 (G3DSA:3.30.230.GENE3D); IPR000754 (PFAM); PTHR21569:SF2 (PANTHER); IPR000754 (PANTHER); IPR023035 (HAMAP); IPR020568 (SUPERFAMILY)	sp|O20029|RR9_CHLRE	30S ribosomal protein S9, chloroplastic	2e-26	tr|D0VMW8|D0VMW8_VOLCA	3e-30	scaffold10.g2232.t1	3e-22	scaffold41_size205970	7e-31
E9NPT4_9CHLO	Alpha subunit of RNA polymerase	alpha subunit of RNA polymerase (chloroplast)	F:DNA binding; F:protein binding; P:biosynthetic process; F:transferase activity; C:nucleolus; P:nucleobase-containing compound metabolic process; C:plastid	EC:2.7.7.6	IPR011263 (SMART); IPR011262 (G3DSA:2.170.120.GENE3D); G3DSA:1.10.150.20 (GENE3D); IPR011262 (PFAM); G3DSA:3.30.1360.10 (GENE3D); IPR009025 (PFAM); PTHR32108:SF0 (PANTHER); PTHR32108 (PANTHER); IPR009025 (SUPERFAMILY); IPR011262 (SUPERFAMILY)	sp|Q8HUH2|RPOA_CHLRE	DNA-directed RNA polymerase subunit alpha	3e-40	tr|D0VMY1|D0VMY1_VOLCA	3e-37			scaffold41_size205970	5e-17
E9NPT5_9CHLO	Ribosomal protein S11	ribosomal S11 (chloroplast)	F:RNA binding; F:structural molecule activity; C:ribosome; C:plastid; P:translation		IPR001971 (PIRSF); IPR019981 (TIGRFAM); IPR001971 (G3DSA:3.30.420.GENE3D); IPR001971 (PFAM); IPR001971 (PANTHER); IPR001971 (HAMAP); SSF53137 (SUPERFAMILY)	sp|Q7YKX3|RR11_CHLRE	30S ribosomal protein S11, chloroplastic	2e-43	tr|D0VMZ8|D0VMZ8_VOLCA	2e-43			scaffold41_size205970	1e-38
E9NPT6_9CHLO	Ribosomal protein	ribosomal L36 (chloroplast)	F:structural molecule activity; C:ribosome; C:plastid; P:translation		IPR000473 (PFAM); IPR000473 (TIGRFAM); IPR000473 (PANTHER); PD002101 (PRODOM); IPR000473 (HAMAP); IPR000473 (SUPERFAMILY)	sp|P59774|RK36_CHLRE	50S ribosomal protein L36, chloroplastic	5e-14	tr|D0VMV3|D0VMV3_VOLCA	5e-14			scaffold41_size205970	9e-10
E9NPT7_9CHLO	Translation initiation factor IF-1	translational initiation factor 1 (chloroplast)	F:translation factor activity, RNA binding; C:ribosome; C:plastid		IPR022967 (SMART); IPR004368 (TIGRFAM); IPR006196 (PFAM); G3DSA:2.40.50.140 (GENE3D); PTHR33370 (PANTHER); IPR004368 (HAMAP); IPR006196 (PROSITE_PROFILES); IPR012340 (SUPERFAMILY)	tr|A8ISP7|A8ISP7_CHLRE	Organellar translation initiation factor (Fragment)	8e-25	tr|D8UFV5|D8UFV5_VOLCA	1e-24			scaffold41_size205970	3e-26
E9NPT8_9CHLO	Ribosomal protein S8	ribosomal S8 (chloroplast)	F:RNA binding; F:structural molecule activity; C:ribosome; C:plastid; P:translation		IPR000630 (PFAM); G3DSA:3.30.1370.30 (GENE3D); G3DSA:3.30.1490.10 (GENE3D); PTHR11758:SF17 (PANTHER); IPR000630 (PANTHER); IPR000630 (HAMAP); IPR000630 (SUPERFAMILY)	sp|P59775|RR8_CHLRE	30S ribosomal protein S8, chloroplastic	2e-54	tr|D0VMW0|D0VMW0_VOLCA	1e-54			scaffold41_size205970	1e-40
E9NPT9_9CHLO	Ribosomal protein L5	ribosomal L5 (chloroplast)	F:RNA binding; F:structural molecule activity; C:ribosome; C:plastid; P:translation		IPR002132 (PIRSF); IPR031309 (PFAM); IPR031310 (PFAM); IPR022803 (G3DSA:3.30.1440.GENE3D); PTHR11994 (PANTHER); IPR020930 (HAMAP); IPR022803 (SUPERFAMILY)	sp|Q8HTL1|RK5_CHLRE	50S ribosomal protein L5, chloroplastic OS=Chlamydomonas reinhardtii GN=rpl5 PE=3 SV=2	3e-97	tr|D0VMV9|D0VMV9_VOLCA	4e-97			scaffold41_size205970	6e-89
E9NPU0_9CHLO	Ribosomal protein L14	ribosomal L14 (chloroplast)	F:RNA binding; F:structural molecule activity; C:ribosome; C:plastid; P:translation		IPR000218 (SMART); IPR000218 (PFAM); IPR000218 (G3DSA:2.40.150.GENE3D); IPR005745 (TIGRFAM); IPR000218 (PANTHER); PTHR11761:SF13 (PANTHER); IPR000218 (HAMAP); IPR000218 (SUPERFAMILY)	sp|P11094|RK14_CHLRE	50S ribosomal protein L14, chloroplastic	1e-67	tr|D0VMV8|D0VMV8_VOLCA	4e-68	scaffold2.g7084.t1	4e-23	scaffold41_size205970	3e-56
E9NPU1_9CHLO	Ribosomal protein L16	ribosomal L16 (chloroplast)	F:RNA binding; F:structural molecule activity; C:ribosome; C:plastid; P:translation		IPR000114 (PRINTS); IPR000114 (TIGRFAM); IPR016180 (PFAM); IPR016180 (G3DSA:3.90.1170.GENE3D); IPR000114 (PANTHER); PTHR12220:SF14 (PANTHER); IPR000114 (HAMAP); IPR016180 (SUPERFAMILY)	sp|P05726|RK16_CHLRE	50S ribosomal protein L16, chloroplastic	3e-77	tr|D0VMV7|D0VMV7_VOLCA	6e-76			scaffold41_size205970	5e-63
E9NPU2_9CHLO	Ribosomal protein S3	ribosomal S3 (chloroplast)	F:RNA binding; F:structural molecule activity; C:ribosome; C:plastid; P:translation		IPR015946 (G3DSA:3.30.300.GENE3D); IPR001351 (G3DSA:3.30.1140.GENE3D); IPR005704 (TIGRFAM); PF00189 (PFAM); PTHR11760 (PANTHER); PTHR11760:SF19 (PANTHER); IPR005704 (HAMAP); IPR004044 (PROSITE_PROFILES); IPR001351 (SUPERFAMILY); IPR009019 (SUPERFAMILY)	sp|Q08365|RR3_CHLRE	30S ribosomal protein S3, chloroplastic OS=Chlamydomonas reinhardtii GN=rps3 PE=1 SV=2	9e-35	tr|D0VMX7|D0VMX7_VOLCA	2e-34			scaffold41_size205970	4e-54
E9NPU3_9CHLO	Ribosomal protein S19	ribosomal S19 (chloroplast)	F:RNA binding; F:structural molecule activity; C:ribosome; C:plastid; P:translation		IPR002222 (PRINTS); IPR002222 (PIRSF); IPR023575 (G3DSA:3.30.860.GENE3D); IPR002222 (PFAM); IPR005732 (TIGRFAM); IPR002222 (PANTHER); IPR002222 (HAMAP); IPR023575 (SUPERFAMILY)	sp|P59776|RR19_CHLRE	30S ribosomal protein S19, chloroplastic	1e-49	tr|D0VMV6|D0VMV6_VOLCA	7e-51			scaffold41_size205970	3e-44
E9NPU4_9CHLO	Ribosomal protein L2	ribosomal L2 (chloroplast)	F:RNA binding; F:structural molecule activity; C:ribosome; F:transferase activity; C:plastid; P:translation		IPR022669 (SMART); IPR002171 (PIRSF); IPR002171 (SMART); G3DSA:2.40.50.140 (GENE3D); IPR005880 (TIGRFAM); IPR022669 (PFAM); IPR014722 (G3DSA:2.30.30.GENE3D); IPR014726 (G3DSA:4.10.950.GENE3D); IPR022666 (PFAM); IPR002171 (PANTHER); IPR005880 (HAMAP); IPR012340 (SUPERFAMILY); IPR008991 (SUPERFAMILY)	sp|Q8HTL2|RK2_CHLRE	50S ribosomal protein L2, chloroplastic	5e-146	tr|D0VMV5|D0VMV5_VOLCA	6e-143	scaffold26.g3360.t1	5e-65	scaffold41_size205970	3e-114
E9NPU5_9CHLO	Ribosomal protein L23	ribosomal L23 (chloroplast)	F:nucleotide binding; F:RNA binding; F:structural molecule activity; C:ribosome; C:plastid; P:translation		IPR013025 (PFAM); IPR012677 (G3DSA:3.30.70.GENE3D); PTHR11620 (PANTHER); PTHR11620:SF20 (PANTHER); IPR013025 (HAMAP); IPR012678 (SUPERFAMILY)	sp|Q8HTL3|RK23_CHLRE	50S ribosomal protein L23, chloroplastic	2e-29	tr|D0VMV4|D0VMV4_VOLCA	4e-30			scaffold41_size205970	1e-19
E9NPU6_9CHLO	Ribosomal protein S14	ribosomal S14 (chloroplast)	F:RNA binding; F:structural molecule activity; C:ribosome; C:plastid; P:translation		G3DSA:4.10.830.10 (GENE3D); IPR001209 (PFAM); IPR001209 (PANTHER); IPR023036 (HAMAP); SSF57716 (SUPERFAMILY)	sp|Q9GGE2|RR14_CHLRE	30S ribosomal protein S14, chloroplastic	2e-51	tr|D0VMX3|D0VMX3_VOLCA	5e-51			scaffold41_size205970	1e-31
E9NPU7_9CHLO	Ribosomal protein S18	ribosomal S18 (chloroplast)	F:RNA binding; F:structural molecule activity; C:ribosome; C:plastid; P:translation		IPR001648 (PRINTS); IPR001648 (PFAM); IPR001648 (TIGRFAM); IPR001648 (G3DSA:4.10.640.GENE3D); PTHR13479 (PANTHER); IPR001648 (PRODOM); IPR001648 (HAMAP); IPR001648 (SUPERFAMILY)	sp|O20032|RR18_CHLRE	30S ribosomal protein S18, chloroplastic	5e-17	tr|D0VMW5|D0VMW5_VOLCA	4e-18			scaffold41_size205970	1e-16
E9NPU8_9CHLO	50S ribosomal protein L20	ribosomal L20 (chloroplast)	F:RNA binding; F:structural molecule activity; P:cellular component organization; C:ribosome; C:plastid; P:translation		IPR005813 (PRINTS); IPR005813 (TIGRFAM); IPR005813 (PFAM); G3DSA:1.10.1900.20 (GENE3D); IPR005813 (PANTHER); PD002389 (PRODOM); IPR005813 (HAMAP); SSF74731 (SUPERFAMILY)	sp|P26565|RK20_CHLRE	50S ribosomal protein L20, chloroplastic OS=Chlamydomonas reinhardtii GN=rpl20 PE=3 SV=3	5e-41	tr|D0VMU9|D0VMU9_VOLCA	5e-40	scaffold3.g6728.t1	2e-26	scaffold41_size205970	3e-40
E9NPU9_9CHLO	Acetyl-coenzyme A carboxylase carboxyl transferase subunit beta	beta subunit of acetyl- carboxylase carboxytransferase (chloroplast)	F:nucleotide binding; P:lipid metabolic process; P:biosynthetic process; F:transferase activity; C:plastid; P:cellular process	EC:6.4.1; EC:6.4.1.2	IPR000438 (PRINTS); IPR000022 (PFAM); IPR000438 (TIGRFAM); IPR029045 (G3DSA:3.90.226.GENE3D); PTHR22855:SF15 (PANTHER); PTHR22855 (PANTHER); IPR011762 (PROSITE_PROFILES); IPR000438 (HAMAP); IPR029045 (SUPERFAMILY)	tr|A8JHU1|A8JHU1_CHLRE	Acetyl-coa carboxylase beta-carboxyltransferase subunit of plastidic multimeric ACCase (Fragment)	1e-162	tr|D8U455|D8U455_VOLCA	7e-171			scaffold41_size205970	2e-168
E9NPV0_9CHLO	Probable transport protein	probable transport (chloroplast)	F:nucleotide binding; C:membrane; C:plastid; F:transporter activity; F:hydrolase activity	EC:3.6.1; EC:3.6.1.3; EC:3.6.1.15	IPR003593 (SMART); IPR005666 (TIGRFAM); IPR027417 (G3DSA:3.40.50.GENE3D); IPR003439 (PFAM); PTHR24220 (PANTHER); PTHR24220:SF123 (PANTHER); IPR003439 (PROSITE_PROFILES); IPR027417 (SUPERFAMILY)	tr|Q6QJE1|Q6QJE1_CHLRE	Chloroplast ATP-binding protein	8e-77	tr|D8TIC2|D8TIC2_VOLCA	7e-77	scaffold5.g888.t1	1e-66	scaffold42_size96234	8e-38
E9NPV1_9CHLO	Envelope membrane protein	chloroplast enveloppe membrane (chloroplast)	C:membrane; C:plastid; F:transporter activity		IPR004282 (PFAM); PTHR33650 (PANTHER); PTHR33650:SF2 (PANTHER); IPR004282 (HAMAP)	sp|Q37050|CEMA_CHLRE	Chloroplast envelope membrane protein	4e-32	tr|D0VMZ5|D0VMZ5_VOLCA	3e-34			scaffold41_size205970	2e-47
E9NPV2_9CHLO	Photosystem I iron-sulfur center	subunit VII of photosystem I (Fe-Spolypeptide) (chloroplast)	P:generation of precursor metabolites and energy; F:catalytic activity; C:membrane; P:photosynthesis; F:binding; C:plastid; C:thylakoid		IPR017491 (TIGRFAM); IPR017896 (PFAM); G3DSA:3.30.70.20 (GENE3D); PTHR24960 (PANTHER); PTHR24960:SF40 (PANTHER); IPR017896 (PROSITE_PROFILES); IPR017491 (HAMAP); SSF54862 (SUPERFAMILY)	sp|Q00914|PSAC_CHLRE	Photosystem I iron-sulfur center OS=Chlamydomonas reinhardtii GN=psaC PE=1 SV=2	2e-51	tr|D0VMU0|D0VMU0_VOLCA	2e-51			scaffold41_size205970	1e-47
E9NPV3_9CHLO	Photosystem II reaction center protein M	M of photosystem II (chloroplast)	P:generation of precursor metabolites and energy; C:membrane; P:photosynthesis; C:plastid; C:thylakoid		IPR007826 (TIGRFAM); IPR007826 (PFAM); PTHR35774 (PANTHER); IPR007826 (HAMAP); SSF161033 (SUPERFAMILY)	sp|P92277|PSBM_CHLRE	Photosystem II reaction center protein M	9e-13	tr|D0VMX4|D0VMX4_VOLCA	7e-13			scaffold41_size205970	3e-12
E9NPV4_9CHLO	Photosystem I assembly protein Ycf3	hypothetical chloroplast RF3 (chloroplast)	F:protein binding; C:membrane; P:photosynthesis; C:plastid; C:thylakoid		IPR019734 (SMART); IPR011990 (G3DSA:1.25.40.GENE3D); IPR001440 (PFAM); PTHR26312 (PANTHER); PTHR26312:SF81 (PANTHER); IPR022818 (HAMAP); IPR013026 (PROSITE_PROFILES); IPR019734 (PROSITE_PROFILES); IPR011990 (SUPERFAMILY)	sp|O20031|YCF3_CHLRE	Photosystem I assembly protein Ycf3	6e-109	tr|D0VMW6|D0VMW6_VOLCA	8e-109			scaffold41_size205970	4e-92
E9NPV5_9CHLO	Photosystem II CP47 reaction center protein	CP47 chlorophyll apo of photosystem II (chloroplast)	P:generation of precursor metabolites and energy; C:membrane; P:cellular protein modification process; P:photosynthesis; F:binding; C:plastid; C:thylakoid		IPR017486 (TIGRFAM); IPR000932 (PFAM); PTHR33180:SF5 (PANTHER); PTHR33180 (PANTHER); IPR017486 (HAMAP); IPR000932 (SUPERFAMILY)	sp|P37255|PSBB_CHLRE	Photosystem II CP47 reaction center protein	0	tr|D0VMY2|D0VMY2_VOLCA	0			scaffold41_size205970	0
E9NPV6_9CHLO	Photosystem II reaction center protein T	photosystem II T (chloroplast)	C:membrane; P:photosynthesis; C:plastid; C:thylakoid		IPR001743 (PFAM); PTHR36411 (PANTHER); PTHR36411:SF2 (PANTHER); IPR001743 (PRODOM); IPR001743 (HAMAP); SSF161029 (SUPERFAMILY)	sp|P37256|PSBT_CHLRE	Photosystem II reaction center protein T	1e-13	tr|D0VMY3|D0VMY3_VOLCA	3e-14			scaffold41_size205970	2e-12
E9NPV7_9CHLO	Protein PsbN	N of photosystem II (chloroplast)	C:membrane; P:photosynthesis; C:plastid; C:thylakoid		IPR003398 (PFAM); PTHR35326 (PANTHER); PTHR35326:SF2 (PANTHER); IPR003398 (PRODOM); IPR003398 (HAMAP)	sp|Q06480|PSBN_CHLRE	Protein PsbN	2e-14	tr|D0VMY4|D0VMY4_VOLCA	2e-14			scaffold41_size205970	4e-20
E9NPV8_9CHLO	Photosystem II protein H	10 kDa phospho of photosystem II (chloroplast)	C:membrane; P:photosynthesis; F:binding; C:plastid; C:thylakoid		G3DSA:1.20.5.880 (GENE3D); IPR001056 (PFAM); PTHR34469 (PANTHER); IPR001056 (PRODOM); IPR001056 (HAMAP); SSF161025 (SUPERFAMILY)	tr|B8XSL8|B8XSL8_CHLRE	Photosystem II protein H (Fragment)	2e-26	tr|D0VMY5|D0VMY5_VOLCA	1e-24			scaffold41_size205970	3e-29
E9NPV9_9CHLO	DNA-directed RNA polymerase subunit beta	beta subunit of RNA polymerase (chloroplast)	F:DNA binding; P:biosynthetic process; F:transferase activity; C:nucleolus; P:nucleobase-containing compound metabolic process; C:plastid	EC:2.7.7.6	G3DSA:3.90.1100.10 (GENE3D); IPR014724 (G3DSA:2.40.50.GENE3D); IPR007120 (PFAM); IPR007642 (PFAM); G3DSA:2.40.50.100 (GENE3D); IPR007645 (PFAM); IPR007642 (G3DSA:3.90.1110.GENE3D); IPR007120 (G3DSA:2.40.270.GENE3D); IPR007641 (PFAM); IPR015712 (PANTHER); PTHR20856:SF20 (PANTHER); IPR010243 (HAMAP); SSF64484 (SUPERFAMILY); SSF64484 (SUPERFAMILY)	sp|Q8HTL7|RPOB2_CHLRE	DNA-directed RNA polymerase subunit beta C-terminal section	0	tr|D0VN01|D0VN01_VOLCA	0	scaffold2.g6808.t1	6e-39	scaffold41_size205970	9e-145
E9NPW0_9CHLO	DNA-directed RNA polymerase	beta subunit of RNA polymerase (chloroplast)	F:DNA binding; P:biosynthetic process; F:transferase activity; C:nucleolus; P:nucleobase-containing compound metabolic process; C:plastid	EC:2.7.7.6	IPR006592 (SMART); IPR007080 (PFAM); G3DSA:2.40.40.20 (GENE3D); IPR000722 (PFAM); IPR007066 (PFAM); PTHR19376 (PANTHER); PTHR19376:SF32 (PANTHER); SSF64484 (SUPERFAMILY)	sp|Q8HUH0|RPC2B_CHLRE	DNA-directed RNA polymerase subunit beta' C-terminal section	2e-116	tr|D0VMU7|D0VMU7_VOLCA	7e-117	scaffold455.g5909.t1	8e-11	scaffold41_size205970	2e-105
E9NPW1_9CHLO	Beta'' subunit of RNA polymerase	beta subunit of RNA polymerase (chloroplast)	F:DNA binding; P:biosynthetic process; F:transferase activity; C:nucleolus; P:nucleobase-containing compound metabolic process; C:plastid	EC:2.7.7.6	IPR007081 (PFAM); IPR007083 (PFAM); PTHR19376:SF38 (PANTHER); PTHR19376 (PANTHER); IPR012756 (HAMAP); SSF64484 (SUPERFAMILY)	sp|Q7PCJ6|RPOC2_CHLRE	DNA-directed RNA polymerase subunit beta''	2e-150	tr|D0VMX6|D0VMX6_VOLCA	3e-151			scaffold41_size205970	5e-116
E9NPW2_9CHLO	Cytochrome b559 subunit alpha	cytochrome b559 alpha subunit of photosystem II (chloroplast)	P:generation of precursor metabolites and energy; C:membrane; P:photosynthesis; F:binding; C:plastid; C:thylakoid		IPR006217 (PIRSF); IPR013082 (PFAM); IPR013081 (PFAM); G3DSA:1.20.5.860 (GENE3D); IPR006217 (TIGRFAM); PTHR33391 (PANTHER); PTHR33391:SF4 (PANTHER); IPR006217 (HAMAP); SSF161045 (SUPERFAMILY)	sp|P48268|PSBE_CHLRE	Cytochrome b559 subunit alpha	9e-50	tr|D0VMW9|D0VMW9_VOLCA	2e-49			scaffold41_size205970	9e-48
E9NPW3_9CHLO	Cytochrome b559 subunit beta	cytochrome b559 beta subunit of photosystem II (chloroplast)	P:generation of precursor metabolites and energy; C:membrane; P:photosynthesis; F:binding; C:plastid; C:thylakoid		IPR006241 (PIRSF); IPR006241 (TIGRFAM); IPR013081 (PFAM); PTHR33391:SF2 (PANTHER); PTHR33391 (PANTHER); IPR006241 (HAMAP); SSF161045 (SUPERFAMILY)	sp|Q08363|PSBF_CHLRE	Cytochrome b559 subunit beta OS=Chlamydomonas reinhardtii GN=psbF PE=3 SV=2	1e-17	tr|D0VMY0|D0VMY0_VOLCA	1e-17			scaffold41_size205970	2e-18
E9NPW4_9CHLO	Photosystem II reaction center protein L	L of photosystem II (chloroplast)	C:membrane; P:photosynthesis; C:plastid; C:thylakoid		IPR003372 (PFAM); PTHR33391:SF5 (PANTHER); PTHR33391 (PANTHER); IPR003372 (PRODOM); IPR003372 (HAMAP); SSF161017 (SUPERFAMILY)	sp|P32974|PSBL_CHLRE	Photosystem II reaction center protein L OS=Chlamydomonas reinhardtii GN=psbL PE=3 SV=2	5e-20	tr|D0VMX9|D0VMX9_VOLCA	6e-20			scaffold41_size205970	7e-18
E9NPW5_9CHLO	Photosystem II reaction center protein J	J of photosystem II (chloroplast)	C:membrane; P:photosynthesis; C:plastid; C:thylakoid		IPR002682 (PFAM); PTHR34812:SF2 (PANTHER); PTHR34812 (PANTHER); PD003776 (PRODOM); IPR002682 (HAMAP); SSF161021 (SUPERFAMILY)	sp|O19930|PSBJ_CHLRE	Photosystem II reaction center protein J	2e-20	tr|D0VMT5|D0VMT5_VOLCA	1e-20			scaffold41_size205970	2e-09
E9NPW6_9CHLO	Photosystem I reaction center subunit IX	subunit IX of photosystem I (chloroplast)	C:membrane; P:photosynthesis; C:plastid; C:thylakoid		G3DSA:1.20.5.510 (GENE3D); IPR002615 (PFAM); PTHR36082 (PANTHER); PTHR36082:SF2 (PANTHER); IPR002615 (PRODOM); IPR002615 (HAMAP); IPR002615 (SUPERFAMILY)	tr|C5HJ22|C5HJ22_CHLRE	Photosystem I reaction center subunit IX	3e-21	tr|D0VMT3|D0VMT3_VOLCA	4e-21			scaffold41_size205970	2e-13
E9NPW7_9CHLO	Ribosomal protein S12	ribosomal S12 (chloroplast)	F:RNA binding; F:structural molecule activity; C:ribosome; C:plastid; P:translation		IPR006032 (PRINTS); IPR006032 (PIRSF); IPR005679 (TIGRFAM); G3DSA:2.40.50.140 (GENE3D); IPR006032 (PFAM); IPR006032 (PANTHER); PTHR11652:SF17 (PANTHER); IPR005679 (HAMAP); IPR012340 (SUPERFAMILY)	sp|P14149|RR12_CHLRE	30S ribosomal protein S12, chloroplastic OS=Chlamydomonas reinhardtii GN=rps12 PE=1 SV=3	2e-76	tr|D0VMT2|D0VMT2_VOLCA	6e-77			scaffold41_size205970	5e-68
E9NPW8_9CHLO	Ribosomal protein S7	ribosomal S7 (chloroplast)	F:RNA binding; F:structural molecule activity; C:ribosome; C:plastid; P:translation		IPR000235 (PIRSF); IPR023798 (G3DSA:1.10.455.GENE3D); IPR005717 (TIGRFAM); IPR023798 (PFAM); IPR000235 (PANTHER); IPR005717 (HAMAP); IPR023798 (SUPERFAMILY)	sp|P48267|RR7_CHLRE	30S ribosomal protein S7, chloroplastic OS=Chlamydomonas reinhardtii GN=rps7 PE=1 SV=2	5e-47	tr|D0VMX2|D0VMX2_VOLCA	7e-47	scaffold1.g5882.t1	9e-11	scaffold41_size205970	8e-64
E9NPW9_9CHLO	Elongation factor Tu	translational elongation factor Tu (chloroplast)	F:nucleotide binding; F:translation factor activity, RNA binding; C:ribosome; C:plastid; F:hydrolase activity	EC:3.6.1; EC:3.6.1.15	IPR000795 (PRINTS); IPR004161 (PFAM); IPR027417 (G3DSA:3.40.50.GENE3D); G3DSA:2.40.30.10 (GENE3D); IPR004541 (TIGRFAM); PF00009 (PFAM); G3DSA:2.40.30.10 (GENE3D); IPR004160 (PFAM); IPR005225 (TIGRFAM); PTHR23115:SF146 (PANTHER); PTHR23115 (PANTHER); IPR000795 (PROSITE_PROFILES); IPR004541 (HAMAP); IPR009001 (SUPERFAMILY); IPR027417 (SUPERFAMILY); IPR009000 (SUPERFAMILY)	sp|P17746|EFTU_CHLRE	Elongation factor Tu, chloroplastic	0	tr|D0VMU8|D0VMU8_VOLCA	0	scaffold6.g2697.t1	8e-177	scaffold41_size205970	0
E9NPX0_9CHLO	Ribosomal protein L19	ribosomal L19 (chloroplast)	F:structural molecule activity; C:ribosome; C:plastid; P:translation		IPR001857 (PRINTS); IPR001857 (PIRSF); IPR001857 (TIGRFAM); IPR001857 (PFAM); IPR001857 (PANTHER); IPR001857 (HAMAP); IPR008991 (SUPERFAMILY)	tr|A8IW44|A8IW44_CHLRE	Plastid ribosomal protein L19	2e-32	tr|D8UE13|D8UE13_VOLCA	3e-35	scaffold8.g1358.t1	2e-16	scaffold41_size205970	4e-43
E9NPX2_9CHLO	Ribosomal protein S4	ribosomal S4 (chloroplast)	F:RNA binding; F:structural molecule activity; C:ribosome; C:plastid; P:translation		IPR001912 (SMART); IPR002942 (SMART); IPR002942 (G3DSA:3.10.290.GENE3D); IPR005709 (TIGRFAM); IPR001912 (G3DSA:1.10.1050.GENE3D); IPR002942 (PFAM); IPR001912 (PFAM); IPR022801 (PANTHER); PTHR11831:SF4 (PANTHER); IPR005709 (HAMAP); IPR002942 (PROSITE_PROFILES); SSF55174 (SUPERFAMILY)	sp|P48270|RR4_CHLRE	30S ribosomal protein S4, chloroplastic	1e-56	tr|D0VMW2|D0VMW2_VOLCA	3e-56			scaffold41_size205970	3e-75
E9NPX3_9CHLO	Ribulose-1,5-bisphosphate carboxylase/oxygenase large subunit	ribulose-1,5-bisphosphate carboxylase oxygenase large subunit (chloroplast)	F:catalytic activity; P:photosynthesis; F:binding; C:plastid	EC:4.1.1.39	IPR017443 (G3DSA:3.30.70.GENE3D); IPR000685 (G3DSA:3.20.20.GENE3D); IPR017443 (PFAM); IPR000685 (PFAM); PTHR23321 (PANTHER); PTHR23321:SF31 (PANTHER); IPR020888 (HAMAP); IPR017443 (SUPERFAMILY); IPR000685 (SUPERFAMILY)	sp|P00877|RBL_CHLRE	Ribulose bisphosphate carboxylase large chain	0	tr|D0VMZ0|D0VMZ0_VOLCA	0			scaffold41_size205970	0
E9NPX5_9CHLO	Cytochrome b6	apocytochrome b6 of cytochrome b6 f complex (chloroplast)	P:generation of precursor metabolites and energy; F:catalytic activity; C:membrane; P:photosynthesis; F:binding; C:plastid; C:thylakoid		IPR023530 (PIRSF); IPR027387 (G3DSA:1.20.810.GENE3D); IPR005797 (PFAM); PTHR19271 (PANTHER); PTHR19271:SF8 (PANTHER); IPR023530 (HAMAP); IPR005797 (PROSITE_PROFILES); IPR016174 (SUPERFAMILY)	sp|Q00471|CYB6_CHLRE	Cytochrome b6	4e-151	tr|D0VMV1|D0VMV1_VOLCA	2e-151			scaffold41_size205970	3e-124
E9NPX6_9CHLO	Cytochrome b6-f complex subunit 4	subunit IV of cytochrome b6 f complex (chloroplast)	P:generation of precursor metabolites and energy; F:catalytic activity; C:membrane; P:photosynthesis; C:plastid; C:thylakoid		IPR005870 (PIRSF); IPR005798 (PFAM); G3DSA:1.20.5.510 (GENE3D); IPR005870 (TIGRFAM); G3DSA:1.10.287.980 (GENE3D); PTHR19271:SF2 (PANTHER); PTHR19271 (PANTHER); IPR005798 (PROSITE_PROFILES); IPR005870 (HAMAP); IPR005798 (SUPERFAMILY)	sp|P23230|PETD_CHLRE	Cytochrome b6-f complex subunit 4	3e-99	tr|D0VMU4|D0VMU4_VOLCA	5e-98			scaffold41_size205970	1e-92
E9NPX7_9CHLO	Mg-protoporphyrin IX chelatase	magnesium chelatase subunit of protochlorophyllide reductase (chloroplast)	F:nucleotide binding; F:catalytic activity; P:photosynthesis; P:biosynthetic process; C:plastid	EC:6.6.1.1	IPR003593 (SMART); IPR011775 (TIGRFAM); IPR027417 (G3DSA:3.40.50.GENE3D); IPR000523 (PFAM); G3DSA:1.10.8.80 (GENE3D); PTHR32039:SF9 (PANTHER); PTHR32039 (PANTHER); IPR027417 (SUPERFAMILY)	tr|A8IMZ5|A8IMZ5_CHLRE	Mg-protoporphyrin IX chelatase	0	tr|D8TKE8|D8TKE8_VOLCA	0	scaffold7.g3549.t1	1e-149	scaffold41_size205970	9e-176
E9NPX8_9CHLO	Cytochrome f	apocytochrome f of cytochrome b6 f complex (chloroplast)	C:membrane; P:photosynthesis; F:binding; C:plastid; C:thylakoid		IPR002325 (PRINTS); G3DSA:2.40.50.100 (GENE3D); IPR024094 (G3DSA:2.60.40.GENE3D); IPR024094 (PFAM); IPR002325 (PFAM); IPR024058 (G3DSA:1.20.5.GENE3D); PTHR33288:SF3 (PANTHER); PTHR33288 (PANTHER); IPR002325 (PROSITE_PROFILES); IPR002325 (HAMAP); IPR024058 (SUPERFAMILY); IPR024094 (SUPERFAMILY); IPR011054 (SUPERFAMILY)	tr|C5HJ53|C5HJ53_CHLRE	Cytochrome f	3e-167	tr|D0VMU5|D0VMU5_VOLCA	3e-177			scaffold41_size205970	3e-144
E9NPY0_9CHLO	tRNA(Ile)-lysidine synthetase	hypothetical chloroplast RF62 (chloroplast)	C:plastid		IPR011063 (PFAM); IPR014729 (G3DSA:3.40.50.GENE3D); PTHR11807:SF11 (PANTHER); PTHR11807 (PANTHER); SSF52402 (SUPERFAMILY)	tr|A8HSR3|A8HSR3_CHLRE	Predicted protein (Fragment)	2e-17	tr|D8TSC1|D8TSC1_VOLCA	8e-23			scaffold41_size205970	4e-16
E9NPY2_9CHLO	Cytochrome c biogenesis protein CcsA	heme attachment to plastid cytochrome c (chloroplast)	C:membrane; P:cellular component organization; F:binding; C:plastid; C:thylakoid		IPR017562 (TIGRFAM); IPR002541 (PFAM); PTHR30071 (PANTHER); PTHR30071:SF8 (PANTHER); IPR017562 (HAMAP)	sp|P48269|CCSA_CHLRE	Cytochrome c biogenesis protein CcsA OS=Chlamydomonas reinhardtii GN=ccsA PE=1 SV=2	2e-54	tr|D0VMY7|D0VMY7_VOLCA	6e-51			scaffold41_size205970	2e-44
E9NPY3_9CHLO	Photosystem II reaction center protein Z	Z of photosystem II (chloroplast)	P:generation of precursor metabolites and energy; C:membrane; P:photosynthesis; C:plastid; C:thylakoid		IPR002644 (TIGRFAM); IPR002644 (G3DSA:1.10.287.GENE3D); IPR002644 (PFAM); PTHR34971:SF2 (PANTHER); PTHR34971 (PANTHER); IPR002644 (PRODOM); IPR002644 (HAMAP); SSF161055 (SUPERFAMILY)	sp|P92276|PSBZ_CHLRE	Photosystem II reaction center protein Z	1e-22	tr|D0VMX5|D0VMX5_VOLCA	4e-22			scaffold41_size205970	3e-08
E9NPY4_9CHLO	Cell division protein	cell division (chloroplast)	F:nucleotide binding; C:membrane; C:plastid; P:cellular process		IPR003593 (SMART); G3DSA:1.10.8.60 (GENE3D); IPR003959 (PFAM); IPR027417 (G3DSA:3.40.50.GENE3D); PTHR23076:SF61 (PANTHER); PTHR23076 (PANTHER); IPR027417 (SUPERFAMILY)	tr|A8HS40|A8HS40_CHLRE	Membrane AAA-metalloprotease (Fragment)	2e-25	tr|D8UC08|D8UC08_VOLCA	3e-24	scaffold5.g884.t1	6e-23	scaffold41_size205970	3e-50
E9NPY5_9CHLO	Site-determining protein	septum site-determining (chloroplast)	F:nucleotide binding; P:cellular component organization; C:plastid; P:cell cycle; F:hydrolase activity	EC:3.6.1; EC:3.6.1.3; EC:3.6.1.15	IPR025501 (PIRSF); IPR027417 (G3DSA:3.40.50.GENE3D); IPR010223 (TIGRFAM); IPR002586 (PFAM); PTHR13696 (PANTHER); PTHR13696:SF1 (PANTHER); IPR027417 (SUPERFAMILY)	tr|Q8H6H9|Q8H6H9_CHLRE	Cell division inhibitor MinD	1e-151	tr|D8TN93|D8TN93_VOLCA	2e-151			scaffold41_size205970	7e-114
E9NPY7_9CHLO	Cytochrome b6-f complex subunit 5	subunit V of cytochrome b6 f complex (chloroplast)	C:membrane; P:cellular component organization; P:photosynthesis; C:plastid; F:molecular_function; C:thylakoid		IPR003683 (PIRSF); IPR003683 (PFAM); PTHR35516:SF1 (PANTHER); PTHR35516 (PANTHER); IPR003683 (HAMAP); IPR003683 (SUPERFAMILY)	sp|Q08362|PETG_CHLRE	Cytochrome b6-f complex subunit 5	5e-15	tr|D0VMX8|D0VMX8_VOLCA	5e-16			scaffold41_size205970	1e-13
E9NPY8_9CHLO	Light-independent protochlorophyllide reductase subunit B	subunit of protochlorophyllide reductase (chloroplast)	F:nucleotide binding; P:carbohydrate metabolic process; F:catalytic activity; P:photosynthesis; P:biosynthetic process; C:plastid		IPR016209 (PIRSF); G3DSA:3.40.50.1980 (GENE3D); IPR005969 (TIGRFAM); G3DSA:3.40.50.1980 (GENE3D); G3DSA:3.40.50.1980 (GENE3D); IPR013580 (PFAM); IPR000510 (PFAM); PTHR33712:SF1 (PANTHER); PTHR33712 (PANTHER); IPR005969 (HAMAP); SSF53807 (SUPERFAMILY)	sp|P36437|CHLB_CHLRE	Light-independent protochlorophyllide reductase subunit B OS=Chlamydomonas reinhardtii GN=chlB PE=3 SV=2	0	tr|D0VMU3|D0VMU3_VOLCA	0			scaffold41_size205970	0
E9NPZ0_9CHLO	Sulfate transport protein	probable transport (chloroplast)	C:membrane; C:plastid; F:transporter activity; F:hydrolase activity	EC:3.6.1; EC:3.6.1.3; EC:3.6.3.25; EC:3.6.1.15	IPR005667 (TIGRFAM); IPR000515 (PFAM); IPR011865 (TIGRFAM); IPR000515 (G3DSA:1.10.3720.GENE3D); IPR011865 (PTHR30406:PANTHER); PTHR30406 (PANTHER); IPR000515 (PROSITE_PROFILES); IPR000515 (SUPERFAMILY)	sp|Q8RVC7|SULP1_CHLRE	Sulfate permease 1, chloroplastic	7e-107	tr|D8TZ96|D8TZ96_VOLCA	4e-113			scaffold41_size205970	2e-90
E9NPZ1_9CHLO	Hypothetical chloroplast RF1	hypothetical chloroplast RF1 (chloroplast)	C:membrane; C:plastid		no IPS match	sp|P36495|YCF78_CHLRE	Uncharacterized membrane protein ycf78 OS=Chlamydomonas reinhardtii GN=ycf78 PE=3 SV=2	1e-50	tr|D0VMW1|D0VMW1_VOLCA	8e-47			scaffold41_size205970	4e-141
E9NPZ2_9CHLO	ATP synthase CF0 A subunit	CF0 subunit IV of ATP synthase (chloroplast)	P:biosynthetic process; P:nucleobase-containing compound metabolic process; C:plasma membrane; C:plastid; F:transporter activity; C:thylakoid; F:hydrolase activity	EC:3.6.1; EC:3.6.1.3; EC:3.6.1.15	IPR000568 (PRINTS); IPR000568 (G3DSA:1.20.120.GENE3D); IPR000568 (PFAM); IPR000568 (TIGRFAM); IPR000568 (PANTHER); IPR000568 (HAMAP); IPR000568 (SUPERFAMILY)	sp|O63075|ATPI_CHLRE	ATP synthase subunit a, chloroplastic	1e-130	tr|D0VMT4|D0VMT4_VOLCA	3e-131			scaffold41_size205970	4e-109
E9NPZ3_9CHLO	ATP synthase CF0 C subunit	CF0 subunit III of ATP synthase (chloroplast)	F:nucleotide binding; P:generation of precursor metabolites and energy; C:membrane; F:lipid binding; P:biosynthetic process; P:nucleobase-containing compound metabolic process; C:plastid; F:transporter activity; C:thylakoid; F:hydrolase activity	EC:3.6.1; EC:3.6.1.3; EC:3.6.1.15	IPR000454 (PRINTS); IPR000454 (G3DSA:1.20.20.GENE3D); IPR002379 (PFAM); IPR005953 (TIGRFAM); PTHR10031 (PANTHER); MF_01396 (HAMAP); IPR002379 (SUPERFAMILY)	sp|Q37304|ATPH_CHLRE	ATP synthase subunit c, chloroplastic	5e-33	tr|D0VMZ6|D0VMZ6_VOLCA	6e-33			scaffold41_size205970	2e-28
E9NPZ4_9CHLO	CF0 subunit I of ATP synthase	CF0 subunit I of ATP synthase (chloroplast)	P:biosynthetic process; P:nucleobase-containing compound metabolic process; C:plasma membrane; C:plastid; F:transporter activity; C:thylakoid; F:hydrolase activity	EC:3.6.1; EC:3.6.1.3; EC:3.6.1.15	PF00430 (PFAM); PTHR34264 (PANTHER); PTHR34264:SF3 (PANTHER); MF_01398 (HAMAP)	sp|Q8HTL5|ATPF_CHLRE	ATP synthase subunit b, chloroplastic	9e-47	tr|D0VMZ7|D0VMZ7_VOLCA	4e-48			scaffold41_size205970	5e-20
E9NPZ5_9CHLO	ATP synthase subunit alpha	CF1 alpha subunit of ATP synthase (chloroplast)	F:nucleotide binding; P:generation of precursor metabolites and energy; P:biosynthetic process; P:nucleobase-containing compound metabolic process; C:plasma membrane; C:plastid; F:transporter activity; C:thylakoid; F:hydrolase activity	EC:3.6.1; EC:3.6.1.3; EC:3.6.1.15	IPR005294 (PIRSF); IPR005294 (TIGRFAM); IPR000194 (PFAM); IPR000793 (PFAM); IPR004100 (PFAM); IPR027417 (G3DSA:3.40.50.GENE3D); G3DSA:1.20.150.20 (GENE3D); IPR023366 (G3DSA:2.40.30.GENE3D); PTHR15184:SF42 (PANTHER); PTHR15184 (PANTHER); IPR005294 (HAMAP); IPR027417 (SUPERFAMILY); IPR004100 (SUPERFAMILY); IPR000793 (SUPERFAMILY)	tr|B7U1J0|B7U1J0_CHLRE	ATP synthase subunit alpha, chloroplastic	0	tr|D0VMZ1|D0VMZ1_VOLCA	0	scaffold21.g2070.t1	1e-30	scaffold41_size205970	0
E9NPZ6_9CHLO	Photosystem II reaction center protein K	---NA---	C:membrane; P:photosynthesis; C:thylakoid		IPR003687 (PFAM); PTHR35325 (PANTHER); PTHR35325:SF1 (PANTHER); IPR003687 (HAMAP); SSF161037 (SUPERFAMILY)	sp|P18263|PSBK_CHLRE	Photosystem II reaction center protein K	2e-18	tr|D0VMU2|D0VMU2_VOLCA	2e-18
F1DPL0_9CHLO	Ribosomal protein S14	ribosomal S14 (mitochondrion)	C:mitochondrion; F:structural molecule activity; C:ribosome; P:translation		G3DSA:4.10.830.10 (GENE3D); IPR001209 (PFAM); IPR001209 (PANTHER); SSF57716 (SUPERFAMILY)	tr|A8J6P9|A8J6P9_CHLRE	Mitochondrial ribosomal protein S14	9e-21	tr|D8TJG0|D8TJG0_VOLCA	2e-21			scaffold51_size53969	3e-33
F1DPL1_9CHLO	ATP synthase subunit alpha	ATP synthase F1 subunit alpha (mitochondrion)	F:nucleotide binding; P:generation of precursor metabolites and energy; C:mitochondrion; C:membrane; P:biosynthetic process; P:nucleobase-containing compound metabolic process; F:transporter activity; F:hydrolase activity	EC:3.6.1; EC:3.6.1.3; EC:3.6.1.15	IPR005294 (PIRSF); IPR027417 (G3DSA:3.40.50.GENE3D); G3DSA:1.20.150.20 (GENE3D); IPR005294 (TIGRFAM); IPR023366 (G3DSA:2.40.30.GENE3D); IPR000793 (PFAM); IPR004100 (PFAM); IPR000194 (PFAM); PTHR15184 (PANTHER); IPR005294 (PTHR15184:PANTHER); IPR005294 (HAMAP); IPR027417 (SUPERFAMILY); IPR004100 (SUPERFAMILY); IPR000793 (SUPERFAMILY)	tr|Q96550|Q96550_CHLRE	ATP synthase subunit alpha	0	tr|D8UD45|D8UD45_VOLCA	0	scaffold2.g7421.t1	2e-32	scaffold51_size53969	0
F1DPL2_9CHLO	NADH-ubiquinone oxidoreductase chain 1	NADH dehydrogenase subunit 1 (mitochondrion)	P:generation of precursor metabolites and energy; F:catalytic activity; C:mitochondrion; P:biosynthetic process; P:nucleobase-containing compound metabolic process; P:transport; C:plasma membrane	EC:1.6.99.5; EC:1.6.99.3; EC:1.6.5.3	IPR001694 (PFAM); PTHR11432:SF3 (PANTHER); IPR001694 (PANTHER); IPR001694 (HAMAP)	tr|B2XY98|B2XY98_CHLRE	NADH-ubiquinone oxidoreductase chain 1	1e-98	tr|B3GTC0|B3GTC0_VOLCA	2e-98			scaffold51_size53969	5e-114
F1DPL3_9CHLO	NADH-ubiquinone oxidoreductase chain 4	NADH dehydrogenase subunit 4 (mitochondrion)	P:generation of precursor metabolites and energy; F:catalytic activity; C:membrane; C:mitochondrion; P:biosynthetic process; P:nucleobase-containing compound metabolic process; P:transport	EC:1.6.99.5; EC:1.6.99.3; EC:1.6.5.3	IPR003918 (PRINTS); IPR001750 (PFAM); IPR010227 (TIGRFAM); PTHR22773:SF88 (PANTHER); PTHR22773 (PANTHER)	tr|B2XY86|B2XY86_CHLRE	NADH-ubiquinone oxidoreductase chain 4	6e-106	tr|B3GTB6|B3GTB6_VOLCA	2e-103			scaffold51_size53969	0
F1DPL4_9CHLO	Ribosomal protein S12	30S ribosomal S12	F:RNA binding; C:mitochondrion; F:structural molecule activity; C:ribosome; P:translation		IPR006032 (PRINTS); IPR006032 (PIRSF); G3DSA:2.40.50.140 (GENE3D); IPR005679 (TIGRFAM); IPR006032 (PFAM); IPR006032 (PANTHER); IPR005679 (HAMAP); IPR012340 (SUPERFAMILY)	sp|P14149|RR12_CHLRE	30S ribosomal protein S12, chloroplastic OS=Chlamydomonas reinhardtii GN=rps12 PE=1 SV=3	1e-54	tr|D0VMT2|D0VMT2_VOLCA	1e-54			scaffold41_size205970	7e-49
F1DPL6_9CHLO	Cytochrome c oxidase subunit 2	cytochrome c oxidase subunit 2 (mitochondrion)	P:generation of precursor metabolites and energy; F:catalytic activity; C:mitochondrion; C:membrane; F:binding; P:nucleobase-containing compound metabolic process; F:transporter activity	EC:1.9.3.1	PR01166 (PRINTS); IPR014222 (TIGRFAM); IPR011759 (PFAM); IPR011759 (G3DSA:1.10.287.GENE3D); IPR008972 (G3DSA:2.60.40.GENE3D); IPR002429 (PFAM); PTHR22888:SF9 (PANTHER); PTHR22888 (PANTHER); IPR011759 (PROSITE_PROFILES); IPR002429 (PROSITE_PROFILES); IPR011759 (SUPERFAMILY); IPR008972 (SUPERFAMILY)	tr|Q9AU02|Q9AU02_CHLRE	Cytochrome c oxidase subunit II	3e-47	tr|D8TQG6|D8TQG6_VOLCA	4e-47			scaffold51_size53969	3e-93
F1DPL7_9CHLO	Cytochrome c oxidase subunit 3	cytochrome c oxidase subunit 3 (mitochondrion)	P:generation of precursor metabolites and energy; F:catalytic activity; C:mitochondrion; C:membrane; P:nucleobase-containing compound metabolic process; F:transporter activity	EC:1.9.3.1	IPR000298 (PFAM); G3DSA:1.10.287.70 (GENE3D); IPR013833 (G3DSA:1.20.120.GENE3D); IPR024791 (PANTHER); PTHR11403:SF7 (PANTHER); IPR000298 (PROSITE_PROFILES); PS51257 (PROSITE_PROFILES); IPR000298 (SUPERFAMILY)	tr|Q9FV97|Q9FV97_CHLRE	Cytochrome c oxidase subunit 3	7e-50	tr|D8TXP3|D8TXP3_VOLCA	9e-49
F1DPL8_9CHLO	ATP synthase subunit a	ATP synthase F0 subunit 6 (mitochondrion)	C:mitochondrion; C:membrane; P:biosynthetic process; P:nucleobase-containing compound metabolic process; F:transporter activity; F:hydrolase activity		IPR000568 (PRINTS); IPR000568 (TIGRFAM); IPR000568 (G3DSA:1.20.120.GENE3D); IPR000568 (PFAM); IPR000568 (PANTHER); PTHR11410:SF0 (PANTHER); IPR000568 (HAMAP); IPR000568 (SUPERFAMILY)	tr|Q8H762|Q8H762_CHLRE	ATP synthase subunit 6	7e-25	tr|D8UDG7|D8UDG7_VOLCA	8e-24
F1DPL9_9CHLO	Cytochrome b	apocytochrome b (mitochondrion)	P:generation of precursor metabolites and energy; F:catalytic activity; C:mitochondrion; C:membrane; F:binding; P:nucleobase-containing compound metabolic process; F:transporter activity	EC:1.10.2; EC:1.10.2.2	IPR030689 (PIRSF); IPR005797 (PFAM); IPR027387 (G3DSA:1.20.810.GENE3D); IPR005798 (PFAM); PTHR19271:SF5 (PANTHER); PTHR19271 (PANTHER); IPR005797 (PROSITE_PROFILES); IPR005798 (PROSITE_PROFILES); IPR016174 (SUPERFAMILY); IPR005798 (SUPERFAMILY)	tr|B2XY84|B2XY84_CHLRE	Cytochrome b	2e-162	tr|B3GTB3|B3GTB3_VOLCA	1e-159			scaffold32_size168507	3e-59
F1DPM0_9CHLO	NADH-ubiquinone oxidoreductase chain 3	NADH dehydrogenase subunit 3 (mitochondrion)	P:generation of precursor metabolites and energy; F:catalytic activity; C:membrane; C:mitochondrion; P:biosynthetic process; P:nucleobase-containing compound metabolic process; P:transport	EC:1.6.99.5; EC:1.6.99.3; EC:1.6.5.3	IPR000440 (PFAM); IPR000440 (PANTHER); PTHR11058:SF11 (PANTHER); IPR023043 (HAMAP)	tr|Q6V502|Q6V502_CHLRE	NADH-ubiquinone oxidoreductase chain 3	2e-25	tr|D8U2Q5|D8U2Q5_VOLCA	1e-25			scaffold56_size38850	3e-33
F1DPM1_9CHLO	ATP synthase subunit 9, mitochondrial	ATP synthase F0 subunit 9 (mitochondrion)	F:nucleotide binding; C:membrane; C:mitochondrion; F:lipid binding; P:biosynthetic process; P:nucleobase-containing compound metabolic process; F:transporter activity; F:hydrolase activity		IPR000454 (PRINTS); IPR000454 (G3DSA:1.20.20.GENE3D); IPR002379 (PFAM); PTHR10031 (PANTHER); MF_01396 (HAMAP); IPR002379 (SUPERFAMILY)	tr|A8JFE2|A8JFE2_CHLRE	F1F0 ATP synthase subunit 9, isoform A	2e-29	tr|D8UD71|D8UD71_VOLCA	3e-29			scaffold51_size53969	8e-14
F1DPM3_9CHLO	Ribosomal protein L5	ribosomal L5 (mitochondrion)	C:mitochondrion; F:structural molecule activity; C:ribosome; P:translation		IPR002132 (PIRSF); IPR022803 (G3DSA:3.30.1440.GENE3D); IPR031310 (PFAM); IPR031309 (PFAM); PTHR11994:SF4 (PANTHER); PTHR11994 (PANTHER); IPR022803 (SUPERFAMILY)	sp|Q8HTL1|RK5_CHLRE	50S ribosomal protein L5, chloroplastic OS=Chlamydomonas reinhardtii GN=rpl5 PE=3 SV=2	4e-25	tr|D0VMV9|D0VMV9_VOLCA	5e-24			scaffold51_size53969	2e-31
F1DPM4_9CHLO	NADH-ubiquinone oxidoreductase chain 6	NADH dehydrogenase subunit 6 (mitochondrion)	P:generation of precursor metabolites and energy; F:catalytic activity; C:membrane; C:mitochondrion; P:biosynthetic process; P:nucleobase-containing compound metabolic process; P:transport	EC:1.6.99.5; EC:1.6.99.3; EC:1.6.5.3	IPR001457 (PFAM); PTHR33269:SF4 (PANTHER); PTHR33269 (PANTHER)	tr|B2XY90|B2XY90_CHLRE	NADH-ubiquinone oxidoreductase chain 6	1e-11	tr|Q8WF18|Q8WF18_VOLCA	3e-12
F1DPM5_9CHLO	NADH-ubiquinone oxidoreductase chain 5	NADH dehydrogenase subunit 5 (mitochondrion)	P:generation of precursor metabolites and energy; F:catalytic activity; C:mitochondrion; C:membrane; P:biosynthetic process; P:nucleobase-containing compound metabolic process; P:transport	EC:1.6.99.5; EC:1.6.99.3; EC:1.6.5.3	PR01434 (PRINTS); IPR018393 (PRINTS); IPR001516 (PFAM); IPR001750 (PFAM); IPR003945 (TIGRFAM); IPR010934 (PFAM); PTHR22773 (PANTHER); PTHR22773:SF50 (PANTHER)	tr|B2XY87|B2XY87_CHLRE	NADH-ubiquinone oxidoreductase chain 5	2e-98	tr|B3GTB9|B3GTB9_VOLCA	2e-99			scaffold51_size53969	0
F1DPM6_9CHLO	NADH dehydrogenase subunit 7	NADH dehydrogenase subunit 7 (mitochondrion)	F:nucleotide binding; P:generation of precursor metabolites and energy; F:catalytic activity; C:mitochondrion; C:membrane; P:biosynthetic process; P:nucleobase-containing compound metabolic process; P:transport	EC:1.6.99.5; EC:1.6.99.3; EC:1.6.5.3	IPR029014 (G3DSA:1.10.645.GENE3D); IPR001135 (PFAM); IPR022885 (TIGRFAM); PTHR11993:SF10 (PANTHER); PTHR11993 (PANTHER); IPR022885 (HAMAP); IPR029014 (SUPERFAMILY)	tr|Q6V9A8|Q6V9A8_CHLRE	NADH:ubiquinone oxidoreductase 49 kD subunit	0	tr|D8UJ29|D8UJ29_VOLCA	0			scaffold51_size53969	0
F1DPM8_9CHLO	NADH dehydrogenase subunit 9	NADH dehydrogenase subunit 9 (mitochondrion)	P:generation of precursor metabolites and energy; F:catalytic activity; C:mitochondrion; C:membrane; P:biosynthetic process; P:nucleobase-containing compound metabolic process; P:transport	EC:1.6.99.5; EC:1.6.99.3; EC:1.6.5.3	IPR010218 (TIGRFAM); IPR001268 (PFAM); PTHR10884 (PANTHER); PTHR10884:SF10 (PANTHER); IPR001268 (PRODOM); IPR010218 (HAMAP); SSF143243 (SUPERFAMILY)	tr|Q6V507|Q6V507_CHLRE	Putative NADH dehydrogenase subunit 9	8e-80	tr|D8U3T1|D8U3T1_VOLCA	6e-77
F1DPN1_9CHLO	NADH dehydrogenase subunit 2	NADH dehydrogenase subunit 2 (mitochondrion)	P:generation of precursor metabolites and energy; F:catalytic activity; C:mitochondrion; C:membrane; P:biosynthetic process; P:nucleobase-containing compound metabolic process; P:transport	EC:1.6.99.5; EC:1.6.99.3; EC:1.6.5.3	IPR001750 (PFAM); PTHR22773 (PANTHER); PTHR22773:SF89 (PANTHER); IPR010096 (HAMAP)	tr|B2XY89|B2XY89_CHLRE	NADH dehydrogenase subunit 2	6e-19	tr|B3GTB7|B3GTB7_VOLCA	2e-17			scaffold51_size53969	7e-102
F1DPN2_9CHLO	NADH dehydrogenase subunit 4L	NADH dehydrogenase subunit 4L (mitochondrion)	P:generation of precursor metabolites and energy; F:catalytic activity; C:membrane; C:mitochondrion; P:biosynthetic process; P:nucleobase-containing compound metabolic process; P:transport	EC:1.6.99.5; EC:1.6.99.3; EC:1.6.5.3	IPR001133 (PFAM); PTHR11434:SF5 (PANTHER); IPR001133 (PANTHER); IPR001133 (HAMAP)	tr|Q84K56|Q84K56_CHLRE	NADH dehydrogenase subunit 4L	8e-22	tr|D8ULH9|D8ULH9_VOLCA	1e-21			scaffold51_size53969	9e-27
F1DPN3_9CHLO	Cytochrome c oxidase subunit 1	cytochrome c oxidase subunit 1 (mitochondrion)	P:generation of precursor metabolites and energy; F:catalytic activity; C:mitochondrion; F:binding; P:nucleobase-containing compound metabolic process; C:plasma membrane; F:transporter activity	EC:1.9.3.1	IPR000883 (PRINTS); IPR000883 (PFAM); IPR023616 (G3DSA:1.20.210.GENE3D); IPR014241 (TIGRFAM); PTHR10422:SF18 (PANTHER); IPR000883 (PANTHER); IPR023616 (PROSITE_PROFILES); IPR023616 (SUPERFAMILY)	tr|B2XY88|B2XY88_CHLRE	Cytochrome c oxidase subunit 1	0	tr|B3GTB1|B3GTB1_VOLCA	0			scaffold51_size53969	0
F1DPN5_9CHLO	Ribosomal protein S13	ribosomal S13 (mitochondrion)	F:RNA binding; C:mitochondrion; F:structural molecule activity; C:ribosome; P:translation		IPR001892 (PIRSF); G3DSA:1.10.8.50 (GENE3D); IPR001892 (PFAM); IPR027437 (G3DSA:4.10.910.GENE3D); PTHR10871:SF8 (PANTHER); PTHR10871 (PANTHER); IPR001892 (HAMAP); IPR001892 (PROSITE_PROFILES); IPR010979 (SUPERFAMILY)	tr|A8JDP6|A8JDP6_CHLRE	Plastid ribosomal protein S13	3e-13	tr|D8UE02|D8UE02_VOLCA	5e-14			scaffold51_size53969	3e-32
F1DPN6_9CHLO	Ribosomal protein L16	ribosomal L16 (mitochondrion)	F:RNA binding; C:mitochondrion; F:structural molecule activity; C:ribosome; P:translation		IPR000114 (PRINTS); IPR000114 (TIGRFAM); IPR016180 (G3DSA:3.90.1170.GENE3D); IPR016180 (PFAM); IPR000114 (PANTHER); IPR000114 (HAMAP); IPR016180 (SUPERFAMILY)	sp|P05726|RK16_CHLRE	50S ribosomal protein L16, chloroplastic	2e-41	tr|D0VMV7|D0VMV7_VOLCA	7e-42			scaffold41_size205970	2e-41
F1DPN8_9CHLO	Ribosomal protein S19	30S ribosomal S19	C:mitochondrion; F:structural molecule activity; C:ribosome; P:translation		IPR002222 (PRINTS); IPR002222 (PIRSF); IPR002222 (PFAM); IPR023575 (G3DSA:3.30.860.GENE3D); IPR005732 (TIGRFAM); PTHR11880:SF8 (PANTHER); IPR002222 (PANTHER); IPR002222 (HAMAP); IPR023575 (SUPERFAMILY)	tr|A8IZE9|A8IZE9_CHLRE	Mitochondrial ribosomal protein S19 (Fragment)	2e-13	tr|D8U2V4|D8U2V4_VOLCA	2e-12			scaffold41_size205970	4e-11
I0YHY7_9CHLO	Putative pleiotropic drug resistance protein 3	pleiotropic drug resistance 3	F:nucleotide binding; C:membrane; P:transport; F:hydrolase activity	EC:3.6.1; EC:3.6.1.3; EC:3.6.1.15	IPR003593 (SMART); IPR027417 (G3DSA:3.40.50.GENE3D); IPR027417 (G3DSA:3.40.50.GENE3D); IPR013581 (PFAM); IPR003439 (PFAM); IPR029481 (PFAM); IPR013525 (PFAM); PTHR19241:SF307 (PANTHER); PTHR19241 (PANTHER); IPR003439 (PROSITE_PROFILES); IPR027417 (SUPERFAMILY); IPR027417 (SUPERFAMILY)	tr|A8J8F1|A8J8F1_CHLRE	ABC transporter	0	tr|D8UK69|D8UK69_VOLCA	1e-146	scaffold5.g995.t1	2e-139	scaffold17_size836474	1e-15
I0YHZ0_9CHLO	Uncharacterized protein	dolichyl-phosphate beta-glucosyltransferase	C:cytoplasm; C:membrane; P:lipid metabolic process; P:cellular protein modification process; C:endoplasmic reticulum; C:Golgi apparatus; P:biosynthetic process; F:transferase activity	EC:2.4.1.109; EC:2.4.1.83; EC:2.4.1	IPR001173 (PFAM); IPR029044 (G3DSA:3.90.550.GENE3D); PTHR10859 (PANTHER); PTHR10859:SF91 (PANTHER); IPR029044 (SUPERFAMILY)	tr|A8J9D4|A8J9D4_CHLRE	Dolichol-phosphate glucosyltransferase	2e-107	tr|D8U0H5|D8U0H5_VOLCA	3e-111	scaffold8.g1722.t1	4e-111	scaffold8_size1730130	6e-24
I0YHZ1_9CHLO	Uncharacterized protein	polyadenylate-binding RBP47B	F:nucleotide binding; F:nucleic acid binding		IPR000504 (SMART); IPR012677 (G3DSA:3.30.70.GENE3D); IPR012677 (G3DSA:3.30.70.GENE3D); IPR000504 (PFAM); PTHR24012:SF333 (PANTHER); PTHR24012 (PANTHER); IPR000504 (PROSITE_PROFILES); IPR012677 (SUPERFAMILY); IPR012677 (SUPERFAMILY)	tr|A8J9D3|A8J9D3_CHLRE	Predicted protein	8e-48	tr|D8U0H6|D8U0H6_VOLCA	2e-73	scaffold8.g1735.t1	1e-108	scaffold8_size1730130	9e-18
I0YHZ4_9CHLO	RIO1-domain-containing protein	serine threonine- kinase rio2	F:nucleotide binding; C:membrane; P:cellular protein modification process; F:kinase activity	EC:2.7.11	IPR000687 (SMART); G3DSA:3.30.200.20 (GENE3D); IPR011991 (G3DSA:1.10.10.GENE3D); G3DSA:1.10.510.10 (GENE3D); PF01163 (PFAM); IPR015285 (PFAM); PTHR10593 (PANTHER); IPR030484 (PTHR10593:PANTHER); IPR000719 (PROSITE_PROFILES); IPR011009 (SUPERFAMILY); IPR011991 (SUPERFAMILY)	tr|A8J7D9|A8J7D9_CHLRE	Predicted protein	5e-138	tr|D8U638|D8U638_VOLCA	1e-145	scaffold8.g1718.t1	2e-137	scaffold8_size1730130	5e-06
I0YHZ8_9CHLO	ALG6, ALG8 glycosyltransferase	probable dolichyl pyrophosphate Glc1Man9 c2 alpha-1,3-glucosyltransferase	C:cytoplasm; C:membrane; C:endoplasmic reticulum; P:biosynthetic process; F:transferase activity; P:cellular process		IPR004856 (PFAM); IPR004856 (PANTHER); PTHR12413:SF2 (PANTHER)	tr|A8J4X2|A8J4X2_CHLRE	Glycosyl transferase, type ALG6, ALG8 (Fragment)	3e-124	tr|D8UDK3|D8UDK3_VOLCA	4e-125	scaffold8.g1593.t1	9e-99	scaffold8_size1730130	1e-22
I0YHZ9_9CHLO	Ubiquitin-conjugating enzyme	ubiquitin-conjugating enzyme	F:nucleotide binding; F:catalytic activity		SM00212 (SMART); IPR016135 (G3DSA:3.10.110.GENE3D); IPR000608 (PFAM); PTHR24068 (PANTHER); IPR000608 (PROSITE_PROFILES); IPR016135 (SUPERFAMILY)	tr|A8JFM7|A8JFM7_CHLRE	Predicted protein	4e-97	tr|D8UI35|D8UI35_VOLCA	1e-96	scaffold10.g2344.t1	4e-67	scaffold1_size3450625	6e-19
I0YI01_9CHLO	Uncharacterized protein	DNA polymerase lambda isoform X2	C:nucleus; F:DNA binding; P:biosynthetic process; F:transferase activity; P:DNA metabolic process	EC:2.7.7.7	IPR022312 (PRINTS); IPR002054 (SMART); IPR018944 (PFAM); IPR029398 (G3DSA:3.30.210.GENE3D); G3DSA:1.10.150.20 (GENE3D); G3DSA:3.30.460.10 (GENE3D); IPR028207 (PFAM); PTHR11276 (PANTHER); IPR001357 (PROSITE_PROFILES); SSF81585 (SUPERFAMILY); SSF81301 (SUPERFAMILY)	tr|A8JD91|A8JD91_CHLRE	Pol lambda-related class X DNA repair polymerase	4e-25	tr|D8UB26|D8UB26_VOLCA	3e-24	scaffold14.g1222.t1	3e-28
I0YI05_9CHLO	Starch synthase, chloroplastic/amyloplastic	soluble starch synthase	P:carbohydrate metabolic process; P:biosynthetic process; F:transferase activity; C:plastid; P:cellular process	EC:2.4.1.11; EC:2.4.1	IPR001296 (PFAM); IPR011835 (TIGRFAM); G3DSA:3.40.50.2000 (GENE3D); IPR013534 (PFAM); PTHR12526:SF392 (PANTHER); PTHR12526 (PANTHER); IPR011835 (HAMAP); SSF53756 (SUPERFAMILY)	tr|O64927|O64927_CHLRE	Starch synthase, chloroplastic/amyloplastic OS=Chlamydomonas reinhardtii GN=SSS4 PE=2 SV=2	0	tr|D8UK57|D8UK57_VOLCA	0	scaffold16.g123.t1	0	scaffold16_size857609	3e-22
I0YI08_9CHLO	SET domain-containing protein	SET domain-containing	F:protein binding		IPR001214 (PFAM); IPR015353 (G3DSA:3.90.1420.GENE3D); G3DSA:3.90.1410.10 (GENE3D); PTHR13271 (PANTHER); IPR001214 (PROSITE_PROFILES); SSF82199 (SUPERFAMILY); IPR015353 (SUPERFAMILY)	tr|A8J252|A8J252_CHLRE	Predicted protein	3e-22	tr|D8UIW5|D8UIW5_VOLCA	1e-23	scaffold1.g5746.t1	4e-27
I0YI10_9CHLO	Sec7-domain-containing protein (Fragment)	ARF guanine-nucleotide exchange factor GNOM-like	P:signal transduction; F:molecular_function		IPR000904 (SMART); IPR000904 (PFAM); IPR032691 (PFAM); IPR023394 (G3DSA:1.10.1000.GENE3D); G3DSA:1.10.220.20 (GENE3D); PTHR10663:SF131 (PANTHER); PTHR10663 (PANTHER); IPR000904 (PROSITE_PROFILES); IPR000904 (SUPERFAMILY)	tr|A8JCM5|A8JCM5_CHLRE	EMB30/GNOM-like protein	6e-143	tr|D8TLF1|D8TLF1_VOLCA	3e-139	scaffold12.g8000.t1	0	scaffold12_size2011427	2e-11
I0YI11_9CHLO	WD40 repeat-like protein	WD repeat-containing LWD1	F:protein binding		IPR001680 (SMART); IPR015943 (G3DSA:2.130.10.GENE3D); IPR001680 (PFAM); PTHR19919 (PANTHER); IPR001680 (PROSITE_PROFILES); IPR017986 (PROSITE_PROFILES); IPR017986 (SUPERFAMILY)	tr|A8J3I4|A8J3I4_CHLRE	Predicted protein	2e-177	tr|D8TV74|D8TV74_VOLCA	0	scaffold12.g8034.t1	1e-169	scaffold12_size2011427	3e-30
I0YI29_9CHLO	Uncharacterized protein (Fragment)	hypothetical protein COCSUDRAFT_21038, partial	C:membrane; C:integral component of membrane		no IPS match	tr|A8J5B2|A8J5B2_CHLRE	Predicted protein	3e-92	tr|D8U4C1|D8U4C1_VOLCA	2e-92	scaffold4.g5052.t1	5e-88	scaffold2_size3998120	9e-35
I0YI31_9CHLO	Uncharacterized protein	hypothetical protein COCSUDRAFT_55046	C:membrane; C:integral component of membrane		no IPS match	tr|A8HVG0|A8HVG0_CHLRE	Predicted protein (Fragment)	1e-11	tr|D8TZ62|D8TZ62_VOLCA	8e-19	scaffold11.g3890.t1	2e-48	scaffold27_size312300	7e-13
I0YI45_9CHLO	Uncharacterized protein	hypothetical protein COCSUDRAFT_55018	C:membrane; C:integral component of membrane		no IPS match	tr|A8J034|A8J034_CHLRE	Predicted protein	5e-85	tr|D8TLB7|D8TLB7_VOLCA	2e-48	scaffold17.g450.t1	1e-109	scaffold17_size836474	4e-19
I0YI48_9CHLO	Mitochondrial inner membrane translocase	mitochondrial inner membrane translocase	C:mitochondrion; F:binding; P:transport		IPR004217 (PFAM); IPR004217 (G3DSA:1.10.287.GENE3D); IPR004217 (SUPERFAMILY)	tr|A8IRU4|A8IRU4_CHLRE	Mitochondrial inner membrane translocase	2e-20	tr|D8UIB7|D8UIB7_VOLCA	3e-20			scaffold10_size1428175	7e-09
I0YI50_9CHLO	Uncharacterized protein	hypothetical protein COCSUDRAFT_45613			IPR013830 (SUPERFAMILY)	tr|A8JHF5|A8JHF5_CHLRE	Predicted protein	2e-29	tr|D8UDF3|D8UDF3_VOLCA	2e-28	scaffold12.g7996.t1	4e-26	scaffold27_size312300	8e-08
I0YI53_9CHLO	Uncharacterized protein	glycosyl transferase	C:membrane; C:integral component of membrane; F:transferase activity		IPR032719 (PFAM); PTHR41244:SF1 (PANTHER); PTHR41244 (PANTHER); IPR029044 (SUPERFAMILY)	tr|A8I9G3|A8I9G3_CHLRE	Predicted protein	5e-20	tr|D8TJ27|D8TJ27_VOLCA	1e-22	scaffold3.g6362.t1	6e-12
I0YI54_9CHLO	Uncharacterized protein	acetyl- carboxylase 1-like	F:nucleotide binding; F:catalytic activity; C:cytoplasm; P:lipid metabolic process; P:biosynthetic process; P:cellular process	EC:6.4.1; EC:6.4.1.2; EC:6.3.4.14	IPR005482 (SMART); IPR005479 (PFAM); IPR000089 (PFAM); IPR016185 (G3DSA:3.40.50.GENE3D); IPR013537 (PFAM); IPR013816 (G3DSA:3.30.470.GENE3D); IPR029045 (G3DSA:3.90.226.GENE3D); IPR005481 (PFAM); IPR013815 (G3DSA:3.30.1490.GENE3D); IPR005482 (PFAM); IPR000022 (PFAM); IPR029045 (G3DSA:3.90.226.GENE3D); G3DSA:2.40.50.100 (GENE3D); PTHR18866:SF6 (PANTHER); PTHR18866 (PANTHER); IPR000089 (PROSITE_PROF…	tr|A8JEW0|A8JEW0_CHLRE	Predicted protein (Fragment)	2e-121	tr|D8UA31|D8UA31_VOLCA	0	scaffold1.g5434.t1	0	scaffold32_size168507	3e-36
I0YI61_9CHLO	Uncharacterized protein	hypothetical protein COCSUDRAFT_31853	C:membrane; C:integral component of membrane		no IPS match	tr|A8J5B2|A8J5B2_CHLRE	Predicted protein	6e-107	tr|D8U4C1|D8U4C1_VOLCA	1e-102	scaffold4.g5052.t1	7e-98	scaffold2_size3998120	2e-35
I0YI62_9CHLO	Uncharacterized protein	inner membrane translocase	F:phosphoprotein phosphatase activity; C:mitochondrial inner membrane presequence translocase complex; P:protein import into mitochondrial matrix; C:membrane; P:protein dephosphorylation; C:integral component of membrane; P:N-glycan fucosylation; P:protein N-linked glycosylation; F:alpha-(1->6)-fucosyltransferase activity		PTHR13132 (PANTHER); PTHR13132:SF29 (PANTHER)	tr|A8J1S0|A8J1S0_CHLRE	Predicted protein (Fragment)	9e-52	tr|D8UDK6|D8UDK6_VOLCA	3e-73	scaffold1.g5641.t1	1e-26
I0YI65_9CHLO	Uncharacterized protein	ER lumen retaining receptor	C:membrane; C:endoplasmic reticulum; F:binding; P:cellular process		IPR000133 (PRINTS); IPR000133 (PFAM); PTHR10585:SF10 (PANTHER); IPR000133 (PANTHER)	tr|A8HR60|A8HR60_CHLRE	KDEL receptor B	4e-130	tr|D8TM63|D8TM63_VOLCA	3e-127	scaffold3.g6526.t1	2e-17	scaffold1_size3450625	3e-08
I0YI73_9CHLO	Uncharacterized protein	60S ribosomal L12	F:RNA binding; F:structural molecule activity; P:cellular component organization; C:cytosol; C:ribosome; P:translation		IPR000911 (SMART); IPR020784 (PFAM); IPR020784 (G3DSA:3.30.1550.GENE3D); IPR020783 (PFAM); IPR020783 (G3DSA:1.10.10.GENE3D); PTHR11661:SF6 (PANTHER); IPR000911 (PANTHER); IPR000911 (HAMAP); IPR020783 (SUPERFAMILY); IPR020784 (SUPERFAMILY)	tr|A8J597|A8J597_CHLRE	Ribosomal protein L12	7e-86	tr|D8U4B4|D8U4B4_VOLCA	8e-85	scaffold15.g4220.t1	1e-91	scaffold15_size880018	2e-21
I0YI74_9CHLO	Protein disulfide isomerase	disulfide-isomerase 5-4	C:cell; P:cellular homeostasis; F:catalytic activity; C:membrane		IPR013766 (PFAM); PF13850 (PFAM); IPR012336 (G3DSA:3.40.30.GENE3D); IPR012936 (PFAM); PTHR10984:SF37 (PANTHER); PTHR10984 (PANTHER); IPR013766 (PROSITE_PROFILES); IPR012336 (SUPERFAMILY)	tr|A8I4C2|A8I4C2_CHLRE	Protein disulfide isomerase	0	tr|D8U1H1|D8U1H1_VOLCA	0	scaffold1.g5644.t1	0	scaffold1_size3450625	1e-16
I0YI75_9CHLO	Uncharacterized protein	SUPPRESSOR OF FRI 4-like	F:DNA binding		IPR015880 (SMART); PTHR23215 (PANTHER); IPR007087 (PROSITE_PROFILES); IPR003656 (PROSITE_PROFILES)	tr|A8IN53|A8IN53_CHLRE	Predicted protein (Fragment)	2e-31	tr|D8TLS7|D8TLS7_VOLCA	1e-32	scaffold1.g5798.t1	1e-22	scaffold1_size3450625	1e-10
I0YI83_9CHLO	Uncharacterized protein	hypothetical protein COCSUDRAFT_55034	C:membrane; C:integral component of membrane		IPR021838 (PFAM)	tr|A8I7S3|A8I7S3_CHLRE	Predicted protein (Fragment)	2e-12	tr|D8UF33|D8UF33_VOLCA	1e-15
I0YI84_9CHLO	Uncharacterized protein	hypothetical protein COCSUDRAFT_68419	C:membrane; C:integral component of membrane; F:transferase activity		no IPS match	tr|A8J3X6|A8J3X6_CHLRE	Flagellar associated protein (Fragment)	2e-16	tr|D8TR34|D8TR34_VOLCA	3e-17	scaffold6.g2550.t1	7e-43	scaffold6_size1922994	7e-22
I0YI95_9CHLO	Actin/actin-like protein	Actin actin	F:nucleotide binding; C:cytoskeleton; F:structural molecule activity; F:motor activity	EC:3.6.1; EC:3.6.1.15	IPR004000 (PRINTS); IPR004000 (SMART); IPR004000 (PFAM); G3DSA:3.30.420.40 (GENE3D); G3DSA:3.90.640.10 (GENE3D); G3DSA:3.30.420.40 (GENE3D); IPR004000 (PANTHER); PTHR11937:SF200 (PANTHER); SSF53067 (SUPERFAMILY); SSF53067 (SUPERFAMILY)	tr|A8JAV1|A8JAV1_CHLRE	Actin	0	tr|D8UA08|D8UA08_VOLCA	0	scaffold3.g6669.t1	0	scaffold3_size2545224	8e-47
I0YI96_9CHLO	Kinase-like protein (Fragment)	probable serine threonine- kinase WNK4	F:nucleotide binding; P:signal transduction; P:cellular protein modification process; C:cytosol; F:kinase activity	EC:2.7.11	G3DSA:1.10.510.10 (GENE3D); IPR000719 (PFAM); G3DSA:3.30.200.20 (GENE3D); PTHR13902 (PANTHER); IPR000719 (PROSITE_PROFILES); IPR011009 (SUPERFAMILY)	tr|A8INH4|A8INH4_CHLRE	MAP kinase-like protein	4e-105	tr|D8TTX7|D8TTX7_VOLCA	2e-104	scaffold1.g5539.t1	2e-93	scaffold6_size1922994	4e-32
I0YIA2_9CHLO	Uncharacterized protein	Methionine-tRNA partial	F:nucleotide binding; F:protein binding; F:catalytic activity; P:nucleobase-containing compound metabolic process; C:intracellular; P:translation	EC:6.1.1	IPR000008 (SMART); IPR000008 (G3DSA:2.60.40.GENE3D); IPR009543 (PFAM); IPR031646 (PFAM); IPR000008 (G3DSA:2.60.40.GENE3D); IPR000008 (PFAM); IPR026847 (PANTHER); IPR000048 (PROSITE_PROFILES); IPR000008 (PROSITE_PROFILES); IPR000008 (SUPERFAMILY); IPR000008 (SUPERFAMILY)	tr|A8IIB7|A8IIB7_CHLRE	Predicted protein	2e-96	tr|D8TJ75|D8TJ75_VOLCA	2e-86	scaffold20.g7742.t1	0	scaffold20_size1437327	8e-42
I0YIA3_9CHLO	Uncharacterized protein (Fragment)	early light-inducible	C:membrane; C:integral component of membrane		IPR023329 (G3DSA:1.10.3460.GENE3D); PTHR14154:SF5 (PANTHER); PTHR14154 (PANTHER); SSF103511 (SUPERFAMILY)	tr|A8J3T6|A8J3T6_CHLRE	Early light-inducible protein	2e-25	tr|D8TLD7|D8TLD7_VOLCA	1e-19	scaffold15.g4327.t1	1e-23	scaffold9_size1652423	4e-07
I0YIA4_9CHLO	Rab5a Gtpase domain At 1.05 A resolution (Fragment)	ras-related RABF1 isoform X2	F:nucleotide binding; P:signal transduction; C:intracellular		PR00449 (PRINTS); SM00175 (SMART); SM00176 (SMART); SM00174 (SMART); SM00173 (SMART); IPR001806 (PFAM); IPR027417 (G3DSA:3.40.50.GENE3D); IPR005225 (TIGRFAM); PTHR24073:SF132 (PANTHER); PTHR24073 (PANTHER); PS51419 (PROSITE_PROFILES); IPR027417 (SUPERFAMILY)	tr|A8J6A0|A8J6A0_CHLRE	Small rab-related GTPase	5e-63	tr|D8TNV8|D8TNV8_VOLCA	4e-61	scaffold10.g2381.t1	2e-56	scaffold3_size2545224	8e-16
I0YIA5_9CHLO	Uncharacterized protein (Fragment)	lysophospholipid acyltransferase LPEAT1-like isoform X2	C:membrane; P:metabolic process; F:transferase activity		IPR002123 (SMART); IPR002123 (PFAM); PTHR23063 (PANTHER); PTHR23063:SF1 (PANTHER); SSF69593 (SUPERFAMILY)	tr|A8IRA6|A8IRA6_CHLRE	Predicted protein	3e-74	tr|D8TYD0|D8TYD0_VOLCA	9e-72	scaffold20.g7753.t1	3e-85	scaffold20_size1437327	2e-27
I0YIA7_9CHLO	Glycoside hydrolase	mannan endo-1,4-beta-mannosidase 6-like isoform X3	P:carbohydrate metabolic process; F:hydrolase activity		IPR001547 (PFAM); IPR013781 (G3DSA:3.20.20.GENE3D); PTHR31451 (PANTHER); IPR017853 (SUPERFAMILY)	tr|A8HN72|A8HN72_CHLRE	Carbohydrate hydrolase-related protein	2e-59	tr|D8TQE7|D8TQE7_VOLCA	2e-54	scaffold22.g6108.t1	4e-59	scaffold22_size697397	4e-22
I0YIB0_9CHLO	Uncharacterized protein	hypothetical protein COCSUDRAFT_60504			IPR013702 (PFAM)	tr|A8IE93|A8IE93_CHLRE	Putative uncharacterized protein	4e-21	tr|D8TK31|D8TK31_VOLCA	5e-19	scaffold19.g1744.t1	3e-36	scaffold19_size774562	5e-21
I0YIB2_9CHLO	Uncharacterized protein	hypothetical protein COCSUDRAFT_55002			PTHR33828 (PANTHER)	tr|A8IZE2|A8IZE2_CHLRE	Predicted protein	2e-17	tr|D8U2W6|D8U2W6_VOLCA	8e-21	scaffold19.g1741.t1	9e-22	scaffold19_size774562	1e-13
I0YIB3_9CHLO	FAD/NAD(P)-binding domain-containing protein	zeaxanthin chloroplastic-like isoform X2	F:nucleotide binding; F:catalytic activity; P:metabolic process		IPR023753 (G3DSA:3.50.50.GENE3D); IPR002938 (PFAM); PTHR13789:SF224 (PANTHER); PTHR13789 (PANTHER); IPR023753 (SUPERFAMILY)	tr|A8J9E7|A8J9E7_CHLRE	Predicted protein	2e-59	tr|D8U0I1|D8U0I1_VOLCA	2e-47	scaffold7.g3749.t1	3e-38	scaffold7_size1837125	5e-24
I0YIC0_9CHLO	Uncharacterized protein	Serine protease ABC transporter B family tagA	P:protein metabolic process; C:membrane; F:hydrolase activity	EC:3.4.21	IPR015500 (PRINTS); IPR003903 (SMART); IPR006904 (PFAM); IPR000209 (G3DSA:3.40.50.GENE3D); G3DSA:2.60.120.380 (GENE3D); G3DSA:3.50.30.30 (GENE3D); IPR000209 (PFAM); IPR003137 (PFAM); PTHR10795:SF157 (PANTHER); IPR015500 (PANTHER); SSF52025 (SUPERFAMILY); IPR008979 (SUPERFAMILY); IPR000209 (SUPERFAMILY)	tr|A8I563|A8I563_CHLRE	Predicted protein	2e-93	tr|D8U0Y6|D8U0Y6_VOLCA	4e-174	scaffold19.g1740.t1	0	scaffold19_size774562	1e-29
I0YIC2_9CHLO	Uncharacterized protein	RETICULATA-RELATED chloroplastic-like	C:membrane		IPR021825 (PFAM); PTHR31620:SF5 (PANTHER); PTHR31620 (PANTHER)	tr|A8J3R4|A8J3R4_CHLRE	Predicted protein (Fragment)	7e-76	tr|D8U295|D8U295_VOLCA	6e-84	scaffold21.g2139.t1	8e-88	scaffold21_size696144	1e-21
I0YIC5_9CHLO	Cullin	cullin	F:protein binding; P:catabolic process; P:cellular protein modification process; F:transferase activity; C:intracellular		IPR016158 (SMART); IPR019559 (SMART); G3DSA:1.20.1310.10 (GENE3D); G3DSA:1.20.1310.10 (GENE3D); IPR011991 (G3DSA:1.10.10.GENE3D); G3DSA:1.20.1310.10 (GENE3D); IPR011991 (G3DSA:1.10.10.GENE3D); IPR001373 (PFAM); IPR019559 (PFAM); G3DSA:1.20.1310.10 (GENE3D); G3DSA:4.10.1030.10 (GENE3D); PTHR11932:SF72 (PANTHER); PTHR11932 (PANTHER); IPR016158 (PROSITE_PROFILES); IPR016158 (SUPERFAMILY); IPR011991 …	tr|A8IW43|A8IW43_CHLRE	Cullin	0	tr|D8TLE6|D8TLE6_VOLCA	0	scaffold11.g4032.t1	1e-39	scaffold19_size774562	5e-14
I0YIC6_9CHLO	WD40 repeat-like protein	WD repeat-containing 92	F:protein binding		IPR001680 (SMART); IPR015943 (G3DSA:2.130.10.GENE3D); IPR001680 (PFAM); PTHR10971:SF2 (PANTHER); PTHR10971 (PANTHER); IPR017986 (PROSITE_PROFILES); IPR001680 (PROSITE_PROFILES); IPR017986 (SUPERFAMILY)	tr|A8J3F6|A8J3F6_CHLRE	Predicted protein	2e-151	tr|D8U2B4|D8U2B4_VOLCA	2e-150	scaffold13.g337.t1	5e-102	scaffold13_size1291228	1e-42
I0YIC7_9CHLO	Carbonic anhydrase	carbonate dehydratase	F:catalytic activity; P:metabolic process; F:binding; P:cellular process	EC:4.2.1.1	IPR001765 (SMART); IPR001765 (PFAM); IPR001765 (G3DSA:3.40.1050.GENE3D); IPR001765 (PANTHER); PTHR11002:SF9 (PANTHER); IPR001765 (SUPERFAMILY)	tr|E9NQ93|E9NQ93_CHLRE	Carbonic anhydrase	1e-24	tr|D8TYB5|D8TYB5_VOLCA	5e-29	scaffold12.g8281.t1	3e-25	scaffold12_size2011427	2e-15
I0YID2_9CHLO	Kinase-like protein	kinase-like protein	F:nucleotide binding; C:membrane; P:cellular protein modification process; F:kinase activity; F:transporter activity		IPR000719 (SMART); IPR005821 (PFAM); G3DSA:3.30.200.20 (GENE3D); G3DSA:1.10.510.10 (GENE3D); IPR000719 (PFAM); PTHR26392 (PANTHER); IPR000719 (PROSITE_PROFILES); IPR011009 (SUPERFAMILY)	tr|F2Z8J6|F2Z8J6_CHLRE	Transient receptor potential channel	3e-53	tr|D8TN37|D8TN37_VOLCA	3e-26	scaffold17.g526.t1	4e-78	scaffold17_size836474	6e-13
I0YID4_9CHLO	Uncharacterized protein (Fragment)	Microtubule binding YTM1 (contains WD40 repeats) (ISS)			PTHR36846 (PANTHER); IPR002035 (SUPERFAMILY)	tr|A8IX54|A8IX54_CHLRE	Predicted protein	0	tr|D8TVC7|D8TVC7_VOLCA	0	scaffold17.g547.t1	5e-163	scaffold17_size836474	5e-13
I0YID6_9CHLO	Mitochondrial carrier (Fragment)	mitochondrial substrate carrier family P	C:membrane; P:transport		IPR002067 (PRINTS); IPR018108 (PFAM); IPR023395 (G3DSA:1.50.40.GENE3D); PTHR24089:SF0 (PANTHER); PTHR24089 (PANTHER); IPR018108 (PROSITE_PROFILES); IPR023395 (SUPERFAMILY)	tr|A8JHG0|A8JHG0_CHLRE	Predicted protein (Fragment)	1e-79	tr|D8TXH8|D8TXH8_VOLCA	1e-85	scaffold19.g1843.t1	7e-67	scaffold19_size774562	2e-25
I0YID7_9CHLO	Uncharacterized protein	PRA1 family A1-like	C:membrane		IPR004895 (PFAM); PTHR12859:SF0 (PANTHER); PTHR12859 (PANTHER)	tr|A8HWG4|A8HWG4_CHLRE	Predicted protein	4e-51	tr|D8TIS6|D8TIS6_VOLCA	3e-27
I0YID8_9CHLO	Maf-like protein	Maf-like protein	C:cytoplasm		IPR003697 (PIRSF); IPR003697 (PFAM); IPR029001 (G3DSA:3.90.950.GENE3D); IPR003697 (TIGRFAM); PTHR11746 (PANTHER); IPR003697 (HAMAP); IPR029001 (SUPERFAMILY)	tr|A8I590|A8I590_CHLRE	Predicted protein (Fragment)	4e-30	tr|D8UJJ6|D8UJJ6_VOLCA	6e-61	scaffold19.g1760.t1	1e-46	scaffold19_size774562	1e-10
I0YID9_9CHLO	Uncharacterized protein	lysine-specific demethylase JMJ25-like	F:zinc ion binding		IPR003347 (SMART); IPR003347 (PFAM); PTHR12549:SF15 (PANTHER); PTHR12549 (PANTHER); IPR003347 (PROSITE_PROFILES); SSF51197 (SUPERFAMILY)	tr|A8HZA7|A8HZA7_CHLRE	Predicted protein	2e-29	tr|D8TZK3|D8TZK3_VOLCA	2e-36	scaffold30.g4446.t1	2e-56	scaffold30_size250005	8e-07
I0YIE2_9CHLO	Camp-binding domain-like protein	potassium sodium hyperpolarization-activated cyclic nucleotide-gated channel 2-like isoform X2	C:membrane		IPR000595 (SMART); IPR000595 (PFAM); IPR014710 (G3DSA:2.60.120.GENE3D); PTHR10217 (PANTHER); PTHR10217:SF11 (PANTHER); IPR000595 (PROSITE_PROFILES); IPR018490 (SUPERFAMILY)	tr|A8IYN1|A8IYN1_CHLRE	Predicted protein	6e-15	tr|D8TZM7|D8TZM7_VOLCA	9e-17
I0YIE3_9CHLO	Pyruvate carboxylase	pyruvate carboxylase	F:nucleotide binding; F:DNA binding; P:carbohydrate metabolic process; P:generation of precursor metabolites and energy; F:catalytic activity; C:cytoplasm; P:lipid metabolic process; P:biosynthetic process	EC:6.4.1.1; EC:6.3.4.14	IPR005482 (SMART); IPR013785 (G3DSA:3.20.20.GENE3D); IPR005481 (PFAM); IPR005930 (TIGRFAM); IPR003379 (PFAM); IPR000891 (PFAM); IPR013815 (G3DSA:3.30.1490.GENE3D); IPR009057 (G3DSA:1.10.10.GENE3D); G3DSA:3.10.600.10 (GENE3D); IPR005482 (PFAM); IPR013816 (G3DSA:3.30.470.GENE3D); IPR000089 (PFAM); G3DSA:2.40.50.100 (GENE3D); IPR005479 (PFAM); IPR016185 (G3DSA:3.40.50.GENE3D); PTHR18866:SF110 (PANTH…	tr|A8HXT4|A8HXT4_CHLRE	Pyruvate carboxylase (Fragment)	0	tr|D8THK5|D8THK5_VOLCA	0	scaffold26.g3326.t1	0	scaffold32_size168507	1e-54
I0YIE4_9CHLO	DnaJ-domain-containing protein	Chaperone dnaJ 10			IPR001623 (PRINTS); IPR001623 (SMART); IPR015412 (PFAM); IPR026894 (PFAM); IPR001623 (G3DSA:1.10.287.GENE3D); IPR001623 (PFAM); PTHR24078 (PANTHER); IPR001623 (PROSITE_PROFILES); IPR001623 (SUPERFAMILY)	tr|A8HXK0|A8HXK0_CHLRE	DnaJ-like protein	9e-162	tr|D8TI23|D8TI23_VOLCA	4e-148	scaffold20.g7866.t1	7e-148	scaffold20_size1437327	4e-14
I0YIE5_9CHLO	Uncharacterized protein (Fragment)	NADH dehydrogenase [ubiquinone] iron-sulfur mitochondrial-like	P:generation of precursor metabolites and energy; F:catalytic activity; C:membrane; C:mitochondrion; P:biosynthetic process; P:nucleobase-containing compound metabolic process; P:transport	EC:1.6.99.5; EC:1.6.99.3; EC:1.6.5.3	PTHR13156 (PANTHER)	tr|Q6UP30|Q6UP30_CHLRE	NADH:ubiquinone oxidoreductase 13 kD-like subunit	7e-41	tr|D8TKN6|D8TKN6_VOLCA	4e-41	scaffold1.g5620.t1	6e-28	scaffold1_size3450625	2e-11
I0YIE7_9CHLO	BAH-domain-containing protein	bah-phd domain-containing	F:protein binding; P:cellular component organization; F:chromatin binding; C:intracellular		IPR001965 (SMART); IPR001025 (SMART); IPR019787 (PFAM); IPR013083 (G3DSA:3.30.40.GENE3D); IPR001025 (PFAM); PTHR12505:SF27 (PANTHER); PTHR12505 (PANTHER); IPR019787 (PROSITE_PROFILES); IPR001025 (PROSITE_PROFILES); IPR011011 (SUPERFAMILY)	tr|A8JBD1|A8JBD1_CHLRE	BAH protein	8e-57	tr|D8U149|D8U149_VOLCA	3e-52	scaffold27.g5970.t1	1e-32	scaffold27_size312300	2e-14
I0YIF1_9CHLO	Starch-binding domain-like protein	starch-binding domain	F:carbohydrate binding		IPR002044 (SMART); IPR013783 (G3DSA:2.60.40.GENE3D); IPR002044 (PFAM); PTHR15048 (PANTHER); IPR002044 (PROSITE_PROFILES); IPR013784 (SUPERFAMILY)	tr|A8I9A9|A8I9A9_CHLRE	Predicted protein (Fragment)	9e-23	tr|D8TIZ1|D8TIZ1_VOLCA	1e-28	scaffold3.g6389.t1	9e-30	scaffold3_size2545224	1e-14
I0YIF2_9CHLO	Putative plastid geranylgeranyl reductase	geranylgeranyl reductase	F:nucleotide binding; F:catalytic activity; P:photosynthesis; P:biosynthetic process; P:nucleobase-containing compound metabolic process		PR00420 (PRINTS); IPR010253 (TIGRFAM); IPR002938 (PFAM); IPR023753 (G3DSA:3.50.50.GENE3D); G3DSA:3.30.9.10 (GENE3D); IPR011777 (TIGRFAM); IPR011774 (TIGRFAM); PTHR10617 (PANTHER); PTHR10617:SF116 (PANTHER); IPR023753 (SUPERFAMILY)	tr|A8HNE8|A8HNE8_CHLRE	Geranylgeranyl reductase	0	tr|D8UHM8|D8UHM8_VOLCA	0	scaffold1.g5341.t1	0	scaffold1_size3450625	1e-25
I0YIF6_9CHLO	Glyceraldehyde-3-phosphate dehydrogenase	type I glyceraldehyde-3-phosphate dehydrogenase [	F:nucleotide binding; P:carbohydrate metabolic process; F:protein binding; F:catalytic activity		IPR020831 (PRINTS); IPR020831 (PIRSF); IPR020828 (SMART); IPR020828 (PFAM); G3DSA:3.30.360.10 (GENE3D); IPR016040 (G3DSA:3.40.50.GENE3D); IPR006424 (TIGRFAM); IPR020829 (PFAM); IPR020831 (PANTHER); IPR000253 (PROSITE_PROFILES); SSF55347 (SUPERFAMILY); IPR016040 (SUPERFAMILY)	tr|A8JHR9|A8JHR9_CHLRE	Glyceraldehyde-3-phosphate dehydrogenase	3e-177	tr|D8UE09|D8UE09_VOLCA	1e-180	scaffold16.g64.t1	2e-168	scaffold1_size3450625	6e-16
I0YIF8_9CHLO	DUF1000-domain-containing protein	PITH domain-containing 1	F:binding; P:nucleobase-containing compound metabolic process; F:hydrolase activity	EC:3.6.1; EC:3.6.1.3; EC:2.7.7; EC:3.6.1.15	IPR010400 (PFAM); IPR010400 (G3DSA:2.60.120.GENE3D); PTHR12175 (PANTHER); IPR010400 (PROSITE_PROFILES); IPR008979 (SUPERFAMILY)	tr|A8I3E4|A8I3E4_CHLRE	Predicted protein	1e-69	tr|D8UC23|D8UC23_VOLCA	9e-27	scaffold20.g7810.t1	5e-41	scaffold20_size1437327	3e-12
I0YIF9_9CHLO	Uridine kinase	uridine-cytidine kinase C isoform X1	F:nucleotide binding; C:membrane; P:response to endogenous stimulus; C:cytosol; P:biosynthetic process; F:kinase activity; P:nucleobase-containing compound metabolic process	EC:2.7.1.48	IPR000764 (PRINTS); IPR027417 (G3DSA:3.40.50.GENE3D); IPR006083 (PFAM); IPR023577 (G3DSA:2.40.320.GENE3D); IPR023577 (PFAM); PTHR10285 (PANTHER); PTHR10285:SF76 (PANTHER); IPR023577 (PROSITE_PROFILES); IPR033469 (SUPERFAMILY); IPR027417 (SUPERFAMILY)	tr|A8IW58|A8IW58_CHLRE	Uridine kinase (Fragment)	6e-106	tr|D8TTW6|D8TTW6_VOLCA	0	scaffold19.g1868.t1	2e-119	scaffold19_size774562	1e-14
I0YIG1_9CHLO	Uncharacterized protein (Fragment)	Nucleosome-remodeling factor subunit BPTF	F:DNA binding; F:protein binding; C:membrane		IPR001965 (SMART); IPR019787 (PFAM); IPR013083 (G3DSA:3.30.40.GENE3D); PTHR22880 (PANTHER); PTHR22880:SF167 (PANTHER); IPR019787 (PROSITE_PROFILES); IPR011011 (SUPERFAMILY)	tr|A8I5P3|A8I5P3_CHLRE	Putative uncharacterized protein	4e-20	tr|D8UEW1|D8UEW1_VOLCA	3e-22	scaffold20.g7760.t1	2e-15	scaffold20_size1437327	9e-15
I0YIG2_9CHLO	PIP5K-domain-containing protein	phosphatidylinositol 4-phosphate 5-kinase 1-like	P:lipid metabolic process; F:kinase activity	EC:2.7.1	IPR002498 (SMART); IPR003409 (SMART); IPR027483 (G3DSA:3.30.810.GENE3D); IPR003409 (PFAM); G3DSA:2.20.110.10 (GENE3D); IPR027484 (G3DSA:3.30.800.GENE3D); IPR002498 (PFAM); IPR023610 (PANTHER); IPR002498 (PROSITE_PROFILES); SSF56104 (SUPERFAMILY); SSF56104 (SUPERFAMILY); SSF82185 (SUPERFAMILY)	tr|A8J7V0|A8J7V0_CHLRE	Predicted protein (Fragment)	2e-85	tr|D8U7Q2|D8U7Q2_VOLCA	5e-59	scaffold19.g1757.t1	2e-121	scaffold19_size774562	3e-14
I0YIG3_9CHLO	PIP5K-domain-containing protein	phosphatidylinositol 4-phosphate 5-kinase 9-like	F:nucleotide binding; P:lipid metabolic process; F:kinase activity	EC:2.7.1; EC:2.7.1.68	IPR003409 (SMART); IPR002498 (SMART); IPR017163 (PIRSF); IPR003409 (PFAM); IPR002498 (PFAM); G3DSA:2.20.110.10 (GENE3D); IPR027484 (G3DSA:3.30.800.GENE3D); IPR027483 (G3DSA:3.30.810.GENE3D); IPR023610 (PANTHER); IPR002498 (PROSITE_PROFILES); SSF82185 (SUPERFAMILY); SSF82185 (SUPERFAMILY); SSF56104 (SUPERFAMILY)	tr|A8J7V0|A8J7V0_CHLRE	Predicted protein (Fragment)	8e-97	tr|D8U7Q2|D8U7Q2_VOLCA	5e-72	scaffold19.g1758.t1	0	scaffold19_size774562	7e-44
I0YIG4_9CHLO	Uncharacterized protein	Chloroplast envelope membrane	C:membrane		IPR004282 (PFAM); PTHR33650 (PANTHER); PTHR33650:SF1 (PANTHER)	tr|A8HXK4|A8HXK4_CHLRE	Chloroplast proton extrusion protein cemA	5e-64	tr|D8TI22|D8TI22_VOLCA	5e-72	scaffold13.g315.t1	5e-16	scaffold41_size205970	9e-18
I0YIG6_9CHLO	Uncharacterized protein	membrane-anchored ubiquitin-fold 3-like	C:motile cilium		PF13881 (PFAM); G3DSA:3.10.20.90 (GENE3D); PTHR13169 (PANTHER); IPR029071 (SUPERFAMILY)	tr|A8HXJ7|A8HXJ7_CHLRE	Flagellar associated protein	3e-21	tr|D8TI24|D8TI24_VOLCA	8e-21
I0YIG8_9CHLO	Uncharacterized protein	sprT-like domain-containing Spartan			IPR006640 (SMART); IPR006640 (PFAM); PTHR21220 (PANTHER)	tr|A8HX60|A8HX60_CHLRE	Predicted protein (Fragment)	1e-77	tr|D8THX2|D8THX2_VOLCA	6e-59	scaffold20.g7805.t1	6e-79	scaffold20_size1437327	5e-26
I0YIG9_9CHLO	Uncharacterized protein	Jade-1 isoform X3	F:protein binding; C:cytoplasm; P:cellular component organization; P:cellular protein modification process; C:nucleoplasm		IPR001965 (SMART); PF13832 (PFAM); PF13831 (PFAM); IPR013083 (G3DSA:3.30.40.GENE3D); PTHR13793 (PANTHER); PTHR13793:SF87 (PANTHER); IPR019787 (PROSITE_PROFILES); IPR011011 (SUPERFAMILY)	tr|A8IWW5|A8IWW5_CHLRE	Histone methyltransferase (Fragment)	1e-22	tr|D8UBR4|D8UBR4_VOLCA	1e-19	scaffold1.g5313.t1	6e-57	scaffold1_size3450625	1e-16
I0YIH0_9CHLO	RNA-binding domain-containing protein	polyadenylate-binding 2-like isoform X2	F:nucleotide binding; F:nucleic acid binding		IPR000504 (SMART); IPR012677 (G3DSA:3.30.70.GENE3D); IPR000504 (PFAM); PTHR24012:SF436 (PANTHER); PTHR24012 (PANTHER); IPR000504 (PROSITE_PROFILES); IPR012677 (SUPERFAMILY)	tr|A8HVG5|A8HVG5_CHLRE	Poly(A) binding protein (Fragment)	3e-48	tr|D8TI93|D8TI93_VOLCA	3e-56	scaffold20.g7780.t1	2e-14	scaffold20_size1437327	3e-09
I0YIH5_9CHLO	Putative pleiotropic drug resistance protein 3	pleiotropic drug resistance 3	F:nucleotide binding; C:membrane; F:transferase activity; P:transport; F:hydrolase activity	EC:3.6.1; EC:3.6.1.3; EC:3.6.1.15	IPR003593 (SMART); IPR029481 (PFAM); IPR013525 (PFAM); IPR027417 (G3DSA:3.40.50.GENE3D); IPR003439 (PFAM); IPR027417 (G3DSA:3.40.50.GENE3D); PTHR19241 (PANTHER); PTHR19241:SF307 (PANTHER); IPR003439 (PROSITE_PROFILES); IPR027417 (SUPERFAMILY); IPR027417 (SUPERFAMILY)	tr|A8J8F1|A8J8F1_CHLRE	ABC transporter	0	tr|D8UK69|D8UK69_VOLCA	1e-142	scaffold5.g995.t1	6e-138	scaffold17_size836474	9e-12
I0YIH7_9CHLO	Zip-domain-containing protein	Zip-domain-containing protein	C:membrane; F:transporter activity		IPR003689 (PFAM); PTHR11040 (PANTHER)	tr|A8HT74|A8HT74_CHLRE	ZIP family transporter	3e-13	tr|D8TSE6|D8TSE6_VOLCA	7e-15
I0YIH8_9CHLO	Uncharacterized protein	Dihydrolipoyllysine-residue acetyltransferase component of pyruvate dehydrogenase complex	F:transferase activity, transferring acyl groups; P:metabolic process; F:transferase activity		IPR004263 (PFAM); G3DSA:2.40.50.100 (GENE3D); PTHR11062 (PANTHER); IPR011053 (SUPERFAMILY)	tr|A8J8X6|A8J8X6_CHLRE	Predicted protein	4e-14	tr|D8TI07|D8TI07_VOLCA	7e-21	scaffold5.g844.t1	2e-21	scaffold2_size3998120	2e-10
I0YIH9_9CHLO	Sedoheptulose-1,7-bisphosphatase	Sedoheptulose-1,7- chloroplastic	P:carbohydrate metabolic process; P:generation of precursor metabolites and energy; P:catabolic process; P:biosynthetic process; C:extracellular region; P:nucleobase-containing compound metabolic process; C:plastid; C:thylakoid; F:hydrolase activity	EC:3.1; EC:3.1.3.37; EC:3.1.3.23; EC:3.1.3.11; EC:3.1.3.41	IPR023079 (PRINTS); IPR000146 (PIRSF); IPR033391 (PFAM); G3DSA:3.40.190.80 (GENE3D); G3DSA:3.30.540.10 (GENE3D); IPR000146 (PANTHER); PTHR11556:SF2 (PANTHER); IPR000146 (HAMAP); SSF56655 (SUPERFAMILY)	tr|A8IRK4|A8IRK4_CHLRE	Sedoheptulose-1,7-bisphosphatase	0	tr|D8TJY9|D8TJY9_VOLCA	0	scaffold6.g2908.t1	2e-107	scaffold6_size1922994	1e-75
I0YII2_9CHLO	DUF607-domain-containing protein	calcium uniporter mitochondrial-like	C:membrane		IPR006769 (PFAM); PTHR13462 (PANTHER)	tr|A8J6W0|A8J6W0_CHLRE	Predicted protein	6e-45	tr|D8UFF9|D8UFF9_VOLCA	9e-23
I0YII5_9CHLO	Protein yippee-like	yippee Os10g0369500			IPR004910 (PFAM); PTHR13848 (PANTHER); PTHR13848:SF12 (PANTHER)	tr|A8IZB3|A8IZB3_CHLRE	Protein yippee-like	2e-14	tr|D8U2R0|D8U2R0_VOLCA	7e-15	scaffold5.g827.t1	1e-14	scaffold5_size2028652	7e-06
I0YII6_9CHLO	Uncharacterized protein	intraflagellar transport IFT52	C:motile cilium; F:protein binding; F:protein C-terminus binding; C:intraciliary transport particle B		PTHR12969 (PANTHER); PTHR12969:SF7 (PANTHER)	tr|Q944U2|Q944U2_CHLRE	Intraflagellar transport protein component IFT52	1e-31	tr|D8TXI8|D8TXI8_VOLCA	4e-36	scaffold14.g1106.t1	3e-15	scaffold14_size1568905	3e-07
I0YII7_9CHLO	CDP-diacylglycerol--inositol 3-phosphatidyltransferase	probable CDP-diacylglycerol--inositol 3-phosphatidyltransferase 2	C:membrane; P:lipid metabolic process; P:biosynthetic process; F:transferase activity; P:cellular process		IPR014387 (PIRSF); IPR000462 (PFAM); PTHR15362:SF4 (PANTHER); PTHR15362 (PANTHER)	tr|A8ICX2|A8ICX2_CHLRE	Phosphatidylinositol synthase	5e-68	tr|D8TPK4|D8TPK4_VOLCA	4e-73	scaffold6.g2910.t1	1e-52	scaffold6_size1922994	2e-30
I0YIJ1_9CHLO	Uncharacterized protein	thioredoxin-like chloroplastic	C:cell; P:cellular homeostasis; F:catalytic activity; P:metabolic process		IPR013766 (PFAM); IPR012336 (G3DSA:3.40.30.GENE3D); PTHR10438:SF229 (PANTHER); IPR005746 (PANTHER); IPR013766 (PROSITE_PROFILES); IPR012336 (SUPERFAMILY)	tr|A8J348|A8J348_CHLRE	Thioredoxin-like protein	5e-29	tr|D8U4I4|D8U4I4_VOLCA	4e-18	scaffold2.g7167.t1	2e-21	scaffold2_size3998120	6e-06
I0YIJ2_9CHLO	Alpha/beta-hydrolase	alpha beta-hydrolase	C:plastid; F:hydrolase activity		IPR000073 (PRINTS); IPR000073 (PFAM); IPR029058 (G3DSA:3.40.50.GENE3D); PTHR10992:SF752 (PANTHER); PTHR10992 (PANTHER); IPR029058 (SUPERFAMILY)	tr|A8JFA2|A8JFA2_CHLRE	Predicted protein (Fragment)	4e-92	tr|D8UK43|D8UK43_VOLCA	5e-103	scaffold13.g374.t1	2e-38	scaffold4_size2474039	2e-06
I0YIJ5_9CHLO	OTU-domain-containing protein	ubiquitin thioesterase OTU1-like	P:protein metabolic process; F:hydrolase activity		IPR003323 (PFAM); PTHR13312 (PANTHER); IPR003323 (PROSITE_PROFILES); SSF54001 (SUPERFAMILY)	tr|A8J4K2|A8J4K2_CHLRE	Predicted protein (Fragment)	3e-91	tr|D8UIG7|D8UIG7_VOLCA	2e-80	scaffold2.g7280.t1	6e-65	scaffold2_size3998120	4e-16
I0YIJ7_9CHLO	Purple acid phosphatase	purple acid phosphatase 23 isoform X4	C:membrane; P:metabolic process; F:binding; P:cellular process; F:hydrolase activity	EC:3.1; EC:3.1.3.41; EC:3.1.3.2	IPR029052 (G3DSA:3.60.21.GENE3D); IPR004843 (PFAM); IPR015914 (PFAM); IPR025733 (PFAM); IPR015914 (G3DSA:2.60.40.GENE3D); PTHR22953:SF15 (PANTHER); PTHR22953 (PANTHER); IPR029052 (SUPERFAMILY); IPR008963 (SUPERFAMILY)	tr|A8HTI5|A8HTI5_CHLRE	Purple acid phosphatase	9e-73	tr|D8UDV5|D8UDV5_VOLCA	9e-82	scaffold10.g2286.t1	1e-30
I0YIK0_9CHLO	RecF/RecN/SMC protein	structural maintenance of chromosomes 2-1-like	F:nucleotide binding; C:nucleus; F:protein binding; P:cellular component organization; P:cell cycle		IPR010935 (SMART); IPR003395 (PFAM); IPR027417 (G3DSA:3.40.50.GENE3D); IPR010935 (PFAM); IPR027120 (PTHR18937:PANTHER); PTHR18937 (PANTHER); IPR027417 (SUPERFAMILY); IPR010935 (SUPERFAMILY)	tr|A8I8N8|A8I8N8_CHLRE	Structural maintenance of chromosomes protein 2 (Fragment)	0	tr|D8U4S8|D8U4S8_VOLCA	0	scaffold18.g2018.t1	0	scaffold18_size793176	5e-91
I0YIK3_9CHLO	P-loop containing nucleoside triphosphate hydrolase protein	P-loop containing nucleoside triphosphate hydrolase	F:nucleotide binding; F:protein binding; F:chromatin binding; C:intracellular; F:hydrolase activity		IPR003593 (SMART); IPR001965 (SMART); IPR001025 (SMART); IPR027417 (G3DSA:3.40.50.GENE3D); IPR001025 (PFAM); IPR013083 (G3DSA:3.30.40.GENE3D); IPR019787 (PFAM); G3DSA:1.10.8.60 (GENE3D); IPR003959 (PFAM); PTHR10763 (PANTHER); PTHR10763:SF23 (PANTHER); IPR001025 (PROSITE_PROFILES); IPR019787 (PROSITE_PROFILES); IPR027417 (SUPERFAMILY); IPR011011 (SUPERFAMILY)	tr|A8I0F5|A8I0F5_CHLRE	Origin recognition complex subunit 1	3e-61	tr|D8TYM7|D8TYM7_VOLCA	2e-71	scaffold40.g5150.t1	1e-87	scaffold40_size109525	5e-07
I0YIL0_9CHLO	Uncharacterized protein	seleno U	C:chloroplast		IPR032801 (PFAM); IPR032801 (PANTHER)	tr|A8J981|A8J981_CHLRE	Selenoprotein U OS=Chlamydomonas reinhardtii GN=SelU PE=4 SV=2	7e-54	tr|D8TH42|D8TH42_VOLCA	3e-53	scaffold3.g6735.t1	3e-41	scaffold3_size2545224	9e-07
I0YIL2_9CHLO	Heat shock protein 70E	heat shock 70E	F:nucleotide binding		IPR013126 (PRINTS); G3DSA:3.30.420.40 (GENE3D); IPR013126 (PFAM); G3DSA:3.30.420.40 (GENE3D); IPR029047 (G3DSA:2.60.34.GENE3D); IPR029048 (G3DSA:1.20.1270.GENE3D); G3DSA:3.30.30.30 (GENE3D); G3DSA:3.90.640.10 (GENE3D); PTHR19375:SF78 (PANTHER); PTHR19375 (PANTHER); SSF53067 (SUPERFAMILY); IPR029048 (SUPERFAMILY); IPR029048 (SUPERFAMILY); SSF53067 (SUPERFAMILY); IPR029047 (SUPERFAMILY)	tr|A8J3P5|A8J3P5_CHLRE	Heat shock protein 70E	0	tr|D8TSS9|D8TSS9_VOLCA	0	scaffold21.g2220.t1	8e-175	scaffold21_size696144	8e-30
I0YIL6_9CHLO	Mll1 protein (Fragment)	set domain	F:protein binding; P:metabolic process; F:transferase activity		IPR001214 (SMART); IPR003616 (SMART); G3DSA:2.170.270.10 (GENE3D); IPR001214 (PFAM); PTHR22884 (PANTHER); IPR003616 (PROSITE_PROFILES); IPR001214 (PROSITE_PROFILES); SSF82199 (SUPERFAMILY)	tr|A8JHD4|A8JHD4_CHLRE	Histone-lysine N-methyltransferase	5e-49	tr|D8TNR8|D8TNR8_VOLCA	4e-51	scaffold3.g6491.t1	7e-39	scaffold3_size2545224	3e-16
I0YIL7_9CHLO	Uncharacterized protein (Fragment)	set domain	F:protein binding; P:signal transduction; F:transferase activity; C:intracellular		IPR001965 (SMART); PF13831 (PFAM); IPR013083 (G3DSA:3.30.40.GENE3D); PF13832 (PFAM); IPR013083 (G3DSA:3.30.40.GENE3D); PTHR13793 (PANTHER); IPR002219 (PROSITE_PROFILES); IPR019787 (PROSITE_PROFILES); IPR011011 (SUPERFAMILY); IPR011011 (SUPERFAMILY)	tr|A8JHD4|A8JHD4_CHLRE	Histone-lysine N-methyltransferase	1e-61	tr|D8TNR8|D8TNR8_VOLCA	2e-53	scaffold3.g6491.t1	4e-40	scaffold3_size2545224	8e-13
I0YIL8_9CHLO	Arf6/ArfB-family small GTPase	Arf6 -family small GTPase	F:nucleotide binding; P:signal transduction; C:intracellular		IPR006689 (PRINTS); SM00178 (SMART); SM00177 (SMART); IPR005225 (TIGRFAM); IPR027417 (G3DSA:3.40.50.GENE3D); IPR006689 (PFAM); PTHR11711 (PANTHER); PTHR11711:SF168 (PANTHER); IPR024156 (PROSITE_PROFILES); IPR027417 (SUPERFAMILY)	tr|A8ILA3|A8ILA3_CHLRE	ARF/SAR superfamily small monomeric GTP binding protein	5e-107	tr|D8TPF5|D8TPF5_VOLCA	6e-108	scaffold2.g6864.t1	2e-113	scaffold2_size3998120	8e-17
I0YIM1_9CHLO	Uncharacterized protein	dnaJ homolog subfamily C member 7-like	F:protein binding; C:membrane		IPR001623 (PRINTS); IPR001623 (SMART); IPR019734 (SMART); IPR001623 (G3DSA:1.10.287.GENE3D); IPR011990 (G3DSA:1.25.40.GENE3D); IPR011990 (G3DSA:1.25.40.GENE3D); IPR007065 (PFAM); PF13432 (PFAM); IPR001623 (PFAM); IPR019734 (PFAM); IPR011990 (G3DSA:1.25.40.GENE3D); PTHR24074 (PANTHER); PTHR24074:SF8 (PANTHER); IPR001623 (PROSITE_PROFILES); IPR013026 (PROSITE_PROFILES); IPR019734 (PROSITE_PROFILES)…	tr|A8HQN4|A8HQN4_CHLRE	DnaJ-like protein	1e-26	tr|D8TPJ7|D8TPJ7_VOLCA	6e-14	scaffold20.g7751.t1	3e-14	scaffold1_size3450625	2e-06
I0YIM2_9CHLO	Carboxypeptidase	serine carboxypeptidase-like 50	P:protein metabolic process; F:hydrolase activity	EC:3.4.21; EC:3.4.16	IPR001563 (PRINTS); IPR001563 (PFAM); IPR029058 (G3DSA:3.40.50.GENE3D); IPR001563 (PANTHER); PTHR11802:SF30 (PANTHER); PS51257 (PROSITE_PROFILES); IPR029058 (SUPERFAMILY)	tr|A8I2M8|A8I2M8_CHLRE	Carboxypeptidase (Fragment)	3e-107	tr|D8UAB7|D8UAB7_VOLCA	1e-119	scaffold2.g6994.t1	2e-88	scaffold2_size3998120	4e-10
I0YIM3_9CHLO	Uncharacterized protein	TBC1 domain family member 1	P:regulation of vesicle fusion; P:activation of GTPase activity; F:GTPase activator activity; C:endomembrane system; P:intracellular protein transport; F:Rab GTPase binding; C:intracellular		IPR000195 (SMART); IPR000195 (PFAM); G3DSA:1.10.8.270 (GENE3D); PTHR22957 (PANTHER); IPR000195 (PROSITE_PROFILES); IPR000195 (SUPERFAMILY); IPR000195 (SUPERFAMILY)	tr|A8I186|A8I186_CHLRE	Predicted protein (Fragment)	2e-39	tr|D8TUC1|D8TUC1_VOLCA	7e-61	scaffold1.g5325.t1	2e-76	scaffold1_size3450625	2e-09
I0YIM5_9CHLO	Eukaryotic release factor 1	eukaryotic peptide chain release factor subunit 1-3-like	P:cellular component organization; F:translation factor activity, RNA binding; C:ribosome		IPR005140 (SMART); IPR005142 (PFAM); G3DSA:3.30.420.60 (GENE3D); IPR005140 (PFAM); IPR005141 (PFAM); IPR004403 (TIGRFAM); IPR024049 (G3DSA:3.30.960.GENE3D); IPR029064 (G3DSA:3.30.1330.GENE3D); IPR004403 (PANTHER); IPR029064 (SUPERFAMILY); SSF53137 (SUPERFAMILY); IPR024049 (SUPERFAMILY)	tr|Q8VZZ5|Q8VZZ5_CHLRE	Eukaryotic release factor 1	0	tr|D8TQT3|D8TQT3_VOLCA	0	scaffold1.g5224.t1	0	scaffold1_size3450625	4e-23
I0YIM6_9CHLO	Uncharacterized protein	hypothetical protein COCSUDRAFT_49343			IPR027989 (PFAM); IPR028031 (PFAM); IPR027986 (PANTHER); PTHR31596:SF1 (PANTHER)	tr|A8J3P4|A8J3P4_CHLRE	Predicted protein	9e-13	tr|D8TST0|D8TST0_VOLCA	1e-39	scaffold14.g1263.t1	4e-21
I0YIM7_9CHLO	Ubiquitinyl hydrolase	Ubiquitin carboxyl-terminal hydrolase 5	F:protein binding; P:catabolic process; P:cellular protein modification process; F:hydrolase activity	EC:3.4; EC:3.4.19.12	IPR016652 (PIRSF); IPR001607 (SMART); IPR015940 (SMART); IPR001394 (PFAM); IPR001607 (PFAM); IPR013083 (G3DSA:3.30.40.GENE3D); IPR015940 (PFAM); G3DSA:1.10.8.10 (GENE3D); PTHR24006 (PANTHER); PTHR24006:SF449 (PANTHER); IPR028889 (PROSITE_PROFILES); IPR001607 (PROSITE_PROFILES); IPR015940 (PROSITE_PROFILES); IPR009060 (SUPERFAMILY); SSF54001 (SUPERFAMILY); SSF57850 (SUPERFAMILY)	tr|A8I7S0|A8I7S0_CHLRE	Predicted protein (Fragment)	0	tr|D8TTA1|D8TTA1_VOLCA	1e-156	scaffold19.g1793.t1	0	scaffold19_size774562	4e-18
I0YIN0_9CHLO	Uncharacterized protein	Diacylglycerol O-acyltransferase 1	C:membrane; F:transferase activity		IPR007130 (PFAM); PTHR12317 (PANTHER); PTHR12317:SF32 (PANTHER)	tr|A8IXB2|A8IXB2_CHLRE	Diacylglycerol acyl transferase	1e-26	tr|D8U2Q8|D8U2Q8_VOLCA	3e-49	scaffold3.g6579.t1	2e-82	scaffold3_size2545224	2e-14
I0YIN3_9CHLO	Uncharacterized protein	Sorting and assembly machinery component 50	C:membrane		IPR000184 (PFAM); PTHR12815 (PANTHER)	tr|A8IML4|A8IML4_CHLRE	Predicted protein (Fragment)	5e-25	tr|D8TKH0|D8TKH0_VOLCA	1e-55	scaffold17.g524.t1	3e-91	scaffold17_size836474	6e-11
I0YIN4_9CHLO	Uncharacterized protein	Zinc finger CCCH domain-containing 24	C:cytoplasm; P:catabolic process; F:binding; P:cellular process; F:hydrolase activity		IPR000571 (SMART); PTHR14493 (PANTHER)	tr|A8IHR8|A8IHR8_CHLRE	Zn-finger protein, CCCH type	4e-24	tr|D8UB13|D8UB13_VOLCA	4e-25	scaffold4.g4925.t1	1e-28	scaffold5_size2028652	3e-16
I0YIN5_9CHLO	Alpha/beta-hydrolase	probable glutamyl chloroplastic isoform X1	P:protein metabolic process; F:hydrolase activity		IPR001375 (PFAM); IPR011042 (G3DSA:2.120.10.GENE3D); IPR029058 (G3DSA:3.40.50.GENE3D); PTHR11731:SF117 (PANTHER); PTHR11731 (PANTHER); IPR029058 (SUPERFAMILY); SSF82171 (SUPERFAMILY)	tr|A8I601|A8I601_CHLRE	Predicted protein (Fragment)	3e-55	tr|D8U6E0|D8U6E0_VOLCA	0	scaffold7.g3377.t1	0	scaffold7_size1837125	6e-18
I0YIN6_9CHLO	RBP11-like subunits of RNA polymerase	DNA-directed RNA polymerases IV and V subunit 11	F:DNA binding; F:protein binding; P:biosynthetic process; F:transferase activity; P:nucleobase-containing compound metabolic process; C:nucleoplasm	EC:2.7.7.6	IPR009025 (PFAM); G3DSA:3.30.1360.10 (GENE3D); PTHR13946 (PANTHER); IPR009025 (SUPERFAMILY)	tr|A8HRP7|A8HRP7_CHLRE	DNA-directed RNA polymerase II, 13.6 kDa polypeptide	9e-33	tr|D8TM87|D8TM87_VOLCA	2e-35	scaffold4.g4847.t1	4e-44	scaffold4_size2474039	2e-12
I0YIN9_9CHLO	Phosphatidylserine decarboxylase like protein	phosphatidylserine decarboxylase proenzyme 3	F:catalytic activity; C:membrane; P:lipid metabolic process; C:Golgi apparatus; P:biosynthetic process; C:intracellular; P:cellular process	EC:4.1.1.65	IPR003817 (PFAM); IPR033177 (TIGRFAM); PTHR10067:SF2 (PANTHER); IPR033177 (PANTHER)	tr|A8JGR0|A8JGR0_CHLRE	Predicted protein	1e-26	tr|D8U0V5|D8U0V5_VOLCA	5e-60	scaffold2.g7334.t1	4e-34	scaffold2_size3998120	1e-11
I0YIP1_9CHLO	Kinase-like protein (Fragment)	kinase partial	F:nucleotide binding; P:cellular protein modification process; F:kinase activity	EC:2.7.11	IPR000719 (SMART); IPR000719 (PFAM); G3DSA:1.10.510.10 (GENE3D); G3DSA:3.30.200.20 (GENE3D); PTHR24058 (PANTHER); PTHR24058:SF17 (PANTHER); IPR000719 (PROSITE_PROFILES); IPR011009 (SUPERFAMILY)	tr|A0A0G4DBZ7|A0A0G4DBZ7_CHLRE	TAG accumulation regulator 1 protein	2e-152	tr|D8U303|D8U303_VOLCA	3e-172	scaffold6.g2505.t1	1e-130	scaffold6_size1922994	6e-40
I0YIP3_9CHLO	FAD dependent oxidoreductase	FAD-dependent oxidoreductase family	F:catalytic activity; P:metabolic process		G3DSA:3.30.9.10 (GENE3D); IPR023753 (G3DSA:3.50.50.GENE3D); IPR006076 (PFAM); PTHR13847:SF184 (PANTHER); PTHR13847 (PANTHER); SSF51971 (SUPERFAMILY)	tr|A8I3I6|A8I3I6_CHLRE	FAD-dependent oxidoreductase	3e-34	tr|D8TLD3|D8TLD3_VOLCA	9e-35	scaffold1.g5223.t1	1e-36	scaffold1_size3450625	3e-28
I0YIP6_9CHLO	RmlC-like cupin	(S)-ureidoglycine aminohydrolase	P:catabolic process; P:biosynthetic process; P:nucleobase-containing compound metabolic process; F:hydrolase activity	EC:3.5.3	IPR014710 (G3DSA:2.60.120.GENE3D); PTHR34571 (PANTHER); PTHR34571:SF1 (PANTHER); IPR011051 (SUPERFAMILY)	tr|A8J2H3|A8J2H3_CHLRE	Glyoxylate induced protein	2e-102	tr|D8UI24|D8UI24_VOLCA	6e-99	scaffold3.g6283.t1	1e-114	scaffold3_size2545224	2e-26
I0YIP7_9CHLO	Beta-amylase	beta-amylase chloroplastic	P:carbohydrate metabolic process; P:catabolic process; P:cellular process; F:hydrolase activity	EC:3.2.1.2; EC:3.2.1	IPR001554 (PRINTS); IPR001554 (PFAM); IPR013781 (G3DSA:3.20.20.GENE3D); PTHR31352 (PANTHER); PTHR31352:SF1 (PANTHER); IPR017853 (SUPERFAMILY)	tr|A8IMV2|A8IMV2_CHLRE	Beta-amylase	0	tr|D8TKA0|D8TKA0_VOLCA	0	scaffold6.g2499.t1	0	scaffold6_size1922994	8e-65
I0YIQ0_9CHLO	Small nuclear ribonucleo protein polypeptide G	small nuclear ribonucleo G	C:nucleus; F:RNA binding; C:cytosol; P:nucleobase-containing compound metabolic process		IPR001163 (SMART); G3DSA:2.30.30.100 (GENE3D); IPR001163 (PFAM); PTHR10553 (PANTHER); IPR010920 (SUPERFAMILY)	tr|A8HRS8|A8HRS8_CHLRE	Small nuclear ribonucleoprotein polypeptide G	1e-35	tr|D8TM80|D8TM80_VOLCA	9e-36	scaffold8.g1627.t1	2e-38	scaffold8_size1730130	3e-12
I0YIQ1_9CHLO	Uncharacterized protein	glycosyltransferase family 4	F:transferase activity		PF13692 (PFAM); G3DSA:3.40.50.2000 (GENE3D); PTHR12526 (PANTHER); PTHR12526:SF384 (PANTHER); SSF53756 (SUPERFAMILY)	tr|A8HU66|A8HU66_CHLRE	Galactolipid galactosyltransferase	0	tr|D8TQZ2|D8TQZ2_VOLCA	0	scaffold2.g6969.t1	0	scaffold2_size3998120	4e-19
I0YIQ3_9CHLO	Uncharacterized protein	glycerol kinase-like	P:carbohydrate metabolic process; C:mitochondrion; P:lipid metabolic process; P:biosynthetic process; F:kinase activity	EC:2.7.1.30	IPR000577 (PIRSF); G3DSA:3.30.420.40 (GENE3D); IPR005999 (TIGRFAM); IPR018485 (PFAM); IPR018484 (PFAM); G3DSA:3.30.420.40 (GENE3D); PTHR10196:SF69 (PANTHER); PTHR10196 (PANTHER); SSF53067 (SUPERFAMILY); SSF53067 (SUPERFAMILY)	tr|A8IT31|A8IT31_CHLRE	Predicted protein (Fragment)	0	tr|D8TXT9|D8TXT9_VOLCA	0	scaffold1.g5780.t1	0	scaffold32_size168507	4e-62
I0YIQ4_9CHLO	Uncharacterized protein	hypothetical protein COCSUDRAFT_60465	P:biosynthetic process; F:transferase activity; P:cellular process	EC:2.3.1	IPR016181 (G3DSA:3.40.630.GENE3D); IPR000182 (PFAM); PTHR23091:SF234 (PANTHER); PTHR23091 (PANTHER); IPR000182 (PROSITE_PROFILES); IPR016181 (SUPERFAMILY)	tr|A8I8D5|A8I8D5_CHLRE	Predicted protein (Fragment)	3e-26	tr|D8U4K3|D8U4K3_VOLCA	1e-29
I0YIQ5_9CHLO	Uncharacterized protein	fatty-acid-binding 1	F:catalytic activity		IPR016087 (PFAM); PTHR28039 (PANTHER); IPR016087 (SUPERFAMILY)	tr|A8HZA4|A8HZA4_CHLRE	Predicted protein	1e-35	tr|D8TZK4|D8TZK4_VOLCA	4e-31	scaffold17.g590.t1	6e-25
I0YIQ6_9CHLO	Uncharacterized protein	hypothetical protein COCSUDRAFT_60467	C:intracellular		IPR019616 (PFAM); PTHR35319 (PANTHER); PTHR35319:SF2 (PANTHER)	tr|A8ILP2|A8ILP2_CHLRE	Predicted protein	8e-53	tr|D8U478|D8U478_VOLCA	7e-54	scaffold6.g2509.t1	7e-49	scaffold6_size1922994	3e-08
I0YIQ7_9CHLO	Uncharacterized protein	exonuclease mut-7 homolog isoform X5	F:nucleic acid binding; F:nuclease activity	EC:3.1	IPR002562 (PFAM); IPR012337 (G3DSA:3.30.420.GENE3D); PTHR13620 (PANTHER); IPR012337 (SUPERFAMILY)	tr|A8I8A1|A8I8A1_CHLRE	Predicted protein	3e-12	tr|D8U4J2|D8U4J2_VOLCA	8e-22	scaffold2.g7389.t1	5e-13
I0YIR2_9CHLO	Uncharacterized protein	hypothetical protein COCSUDRAFT_60473	C:membrane		PS51257 (PROSITE_PROFILES)	tr|A8JHT7|A8JHT7_CHLRE	Predicted protein	9e-21	tr|D8U438|D8U438_VOLCA	2e-22	scaffold3.g6285.t1	5e-16
I0YIR3_9CHLO	Serine racemase-like protein	serine threonine dehydratase	P:metabolic process; F:binding; P:cellular process		IPR001926 (PFAM); G3DSA:3.40.50.1100 (GENE3D); PTHR10314 (PANTHER); PTHR10314:SF17 (PANTHER); IPR001926 (SUPERFAMILY)	tr|A8J977|A8J977_CHLRE	Serine/threonine dehydratase	3e-30	tr|D8UJW5|D8UJW5_VOLCA	9e-30	scaffold21.g2147.t1	2e-65	scaffold21_size696144	4e-13
I0YIR4_9CHLO	SsDNA-binding transcriptional regulator	ssDNA-binding transcriptional regulator	C:nucleus; F:DNA binding; C:mitochondrion; P:biosynthetic process; P:DNA metabolic process; P:response to stress		IPR009044 (G3DSA:2.30.31.GENE3D); IPR013742 (PFAM); PTHR31745 (PANTHER); IPR009044 (SUPERFAMILY)	tr|A2PZC9|A2PZC9_CHLRE	Transcription regulator Pbf-2	9e-25	tr|D8TIY3|D8TIY3_VOLCA	1e-20	scaffold20.g7722.t1	1e-29
I0YIR5_9CHLO	Uncharacterized protein	Arginine deiminase	F:catalytic activity		G3DSA:3.75.10.10 (GENE3D); PF02274 (PFAM); PTHR12737:SF13 (PANTHER); IPR033199 (PANTHER); SSF55909 (SUPERFAMILY)	tr|A8JGG9|A8JGG9_CHLRE	Arginine deiminase	5e-125	tr|D8UF52|D8UF52_VOLCA	2e-129	scaffold12.g8184.t1	1e-139	scaffold12_size2011427	7e-12
I0YIR6_9CHLO	Metallo-hydrolase/oxidoreductase	N-acyl-phosphatidylethanolamine-hydrolyzing phospholipase D	F:protein binding; F:enzyme regulator activity; F:hydrolase activity		IPR015310 (SMART); IPR001279 (PFAM); IPR015310 (PFAM); IPR001279 (G3DSA:3.60.15.GENE3D); PTHR15032:SF4 (PANTHER); PTHR15032 (PANTHER); IPR015310 (SUPERFAMILY); IPR001279 (SUPERFAMILY)	tr|A8JCX4|A8JCX4_CHLRE	Predicted protein	8e-71	tr|D8U572|D8U572_VOLCA	2e-88	scaffold4.g4725.t1	5e-86	scaffold4_size2474039	5e-12
I0YIS0_9CHLO	Protein phosphatase 2C	phosphatase 2C	C:cell; P:cellular protein modification process; F:binding; F:hydrolase activity	EC:3.1.3.16; EC:3.1; EC:3.1.3.41	IPR001932 (SMART); IPR001932 (G3DSA:3.60.40.GENE3D); IPR001932 (PFAM); IPR015655 (PANTHER); PTHR13832:SF217 (PANTHER); IPR001932 (PROSITE_PROFILES); IPR001932 (SUPERFAMILY)	tr|A8J4N7|A8J4N7_CHLRE	Protein phosphatase 2C	3e-148	tr|D8U724|D8U724_VOLCA	2e-138	scaffold2.g6845.t1	2e-72	scaffold2_size3998120	4e-16
I0YIS1_9CHLO	S-adenosyl-L-methionine-dependent methyltransferase	probable 28S rRNA (cytosine-C(5))-methyltransferase	P:metabolic process; F:transferase activity		IPR023267 (PRINTS); IPR001678 (PFAM); IPR029063 (G3DSA:3.40.50.GENE3D); PTHR22807 (PANTHER); PTHR22807:SF4 (PANTHER); IPR001678 (PROSITE_PROFILES); IPR029063 (SUPERFAMILY)	tr|A8J9N5|A8J9N5_CHLRE	Predicted protein (Fragment)	3e-90	tr|D8U0P6|D8U0P6_VOLCA	3e-103	scaffold20.g7726.t1	8e-102	scaffold20_size1437327	3e-34
I0YIS2_9CHLO	Alpha/beta-hydrolase	epoxide hydrolase	C:membrane; F:hydrolase activity		IPR000639 (PRINTS); IPR000073 (PRINTS); IPR029058 (G3DSA:3.40.50.GENE3D); IPR000073 (PFAM); PTHR10992:SF793 (PANTHER); PTHR10992 (PANTHER); IPR029058 (SUPERFAMILY)	tr|A8JD32|A8JD32_CHLRE	Predicted protein (Fragment)	6e-11	tr|D8TJJ0|D8TJJ0_VOLCA	1e-75	scaffold12.g8273.t1	8e-61
I0YIS3_9CHLO	Histidinol phosphate aminotransferase	histidinol phosphate aminotransferase 1	P:embryo development; P:post-embryonic development; P:biosynthetic process; F:transferase activity; F:binding; C:plastid; P:cellular process; P:reproduction	EC:2.6.1.9; EC:2.6.1.57; EC:2.6.1.5; EC:2.6.1.1	IPR005861 (TIGRFAM); IPR015421 (G3DSA:3.40.640.GENE3D); IPR004839 (PFAM); IPR015422 (G3DSA:3.90.1150.GENE3D); PTHR11751 (PANTHER); PTHR11751:SF3 (PANTHER); IPR005861 (HAMAP); IPR015424 (SUPERFAMILY)	tr|A8J3D3|A8J3D3_CHLRE	Histidinol phosphate aminotransferase	0	tr|D8U2G8|D8U2G8_VOLCA	0	scaffold6.g2504.t1	1e-172	scaffold6_size1922994	8e-61
I0YIS4_9CHLO	Uncharacterized protein	peptidyl-prolyl cis-trans isomerase CYP71 isoform X1	F:protein binding; F:catalytic activity; P:flower development; P:cellular protein modification process; P:anatomical structure morphogenesis	EC:5.2.1.8	IPR002130 (PRINTS); IPR001680 (SMART); IPR015943 (G3DSA:2.130.10.GENE3D); IPR002130 (PFAM); IPR001680 (PFAM); IPR029000 (G3DSA:2.40.100.GENE3D); IPR024936 (PANTHER); PTHR11071:SF213 (PANTHER); IPR017986 (PROSITE_PROFILES); IPR001680 (PROSITE_PROFILES); IPR002130 (PROSITE_PROFILES); IPR029000 (SUPERFAMILY); IPR017986 (SUPERFAMILY)	tr|A8I093|A8I093_CHLRE	Peptidyl-prolyl cis-trans isomerase, cyclophilin-type	0	tr|D8TYR4|D8TYR4_VOLCA	0	scaffold2.g6803.t1	0	scaffold2_size3998120	6e-49
I0YIS6_9CHLO	Uncharacterized protein (Fragment)	ACT domain-containing ACR4 isoform X2	P:metabolic process; F:binding		G3DSA:3.30.70.260 (GENE3D); PTHR31096 (PANTHER); PTHR31096:SF5 (PANTHER); IPR002912 (PROSITE_PROFILES); SSF55021 (SUPERFAMILY); SSF55021 (SUPERFAMILY)	tr|A8HPD8|A8HPD8_CHLRE	Predicted protein (Fragment)	6e-89	tr|D8U0C9|D8U0C9_VOLCA	7e-51	scaffold28.g7539.t1	1e-65	scaffold28_size277716	2e-11
I0YIS7_9CHLO	Kinase-like protein (Fragment)	kinase partial	F:nucleotide binding; P:cellular protein modification process; F:kinase activity	EC:2.7.11	IPR001245 (PRINTS); IPR000719 (SMART); G3DSA:1.10.510.10 (GENE3D); IPR001245 (PFAM); G3DSA:3.30.200.20 (GENE3D); PTHR23257 (PANTHER); IPR000719 (PROSITE_PROFILES); IPR011009 (SUPERFAMILY)	tr|A8IWK6|A8IWK6_CHLRE	Mitogen activated protein kinase kinase kinase 3 (Fragment)	1e-58	tr|D8UF00|D8UF00_VOLCA	1e-57	scaffold21.g2140.t1	2e-111	scaffold18_size793176	4e-33
I0YIS8_9CHLO	Formate/nitrite transporter (Fragment)	Formate nitrite partial	C:plasma membrane; F:transporter activity		IPR023271 (G3DSA:1.20.1080.GENE3D); IPR000292 (PFAM); PTHR30520:SF0 (PANTHER); PTHR30520 (PANTHER)	tr|A8J4Q0|A8J4Q0_CHLRE	High affinity nitrite transporter	5e-84	tr|D8TYJ0|D8TYJ0_VOLCA	5e-80	scaffold18.g1993.t1	2e-68	scaffold4_size2474039	6e-22
I0YIS9_9CHLO	Cyclin-like protein	transcription initiation factor IIB	F:protein binding; P:biosynthetic process; P:nucleobase-containing compound metabolic process		IPR000812 (PRINTS); IPR013763 (SMART); IPR013763 (G3DSA:1.10.472.GENE3D); IPR013150 (PFAM); G3DSA:2.20.25.10 (GENE3D); IPR013137 (PFAM); IPR013763 (G3DSA:1.10.472.GENE3D); IPR000812 (PANTHER); IPR013137 (PROSITE_PROFILES); IPR013763 (SUPERFAMILY); SSF57783 (SUPERFAMILY); IPR013763 (SUPERFAMILY)	tr|A8IM89|A8IM89_CHLRE	Predicted protein (Fragment)	6e-69	tr|D8TKC4|D8TKC4_VOLCA	5e-55	scaffold20.g7621.t1	1e-66	scaffold20_size1437327	2e-15
I0YIT0_9CHLO	Ribosomal protein rpl36a	60S ribosomal L44	F:structural molecule activity; C:cytosol; C:ribosome; P:translation		IPR000552 (PFAM); IPR000552 (G3DSA:3.10.450.GENE3D); PTHR10369:SF3 (PANTHER); IPR000552 (PANTHER); IPR000552 (PRODOM); IPR011332 (SUPERFAMILY)	tr|A8IM74|A8IM74_CHLRE	Ribosomal protein L36a	2e-51	tr|D8TKB6|D8TKB6_VOLCA	3e-51	scaffold20.g7712.t1	2e-60	scaffold20_size1437327	9e-15
I0YIT3_9CHLO	Protein serine/threonine phosphatase 2C (Fragment)	phosphatase 2C and cyclic nucleotide-binding kinase domain-containing isoform X2	C:cell; P:cellular protein modification process; F:binding; F:hydrolase activity	EC:3.1.3.16; EC:3.1; EC:3.1.3.41	IPR001932 (SMART); IPR001932 (G3DSA:3.60.40.GENE3D); IPR001932 (PFAM); IPR015655 (PANTHER); PTHR13832:SF267 (PANTHER); IPR001932 (PROSITE_PROFILES); IPR001932 (SUPERFAMILY)	tr|A8II27|A8II27_CHLRE	Predicted protein	1e-153	tr|D8UEG7|D8UEG7_VOLCA	2e-53	scaffold20.g7620.t1	1e-107	scaffold20_size1437327	4e-36
I0YIT4_9CHLO	Serine/threonine protein kinase 15 (Fragment)	uncharacterized LOC100383454 isoform X1	F:nucleotide binding; P:signal transduction; P:cellular protein modification process; F:kinase activity; C:intracellular	EC:2.7.11	IPR000719 (SMART); G3DSA:1.10.510.10 (GENE3D); IPR000719 (PFAM); G3DSA:3.30.200.20 (GENE3D); PTHR24356:SF155 (PANTHER); PTHR24356 (PANTHER); IPR000961 (PROSITE_PROFILES); IPR000719 (PROSITE_PROFILES); IPR011009 (SUPERFAMILY)	tr|A8IMW2|A8IMW2_CHLRE	Serine/threonine protein kinase 15 (Fragment)	8e-160	tr|D8TK99|D8TK99_VOLCA	8e-152	scaffold20.g7617.t1	3e-143	scaffold20_size1437327	9e-72
I0YIT5_9CHLO	Putative calcium binding atopy-related autoantigen 1	calcium uptake mitochondrial-like	F:binding		IPR002048 (SMART); IPR011992 (G3DSA:1.10.238.GENE3D); IPR002048 (PFAM); IPR011992 (G3DSA:1.10.238.GENE3D); IPR002048 (PFAM); IPR011992 (G3DSA:1.10.238.GENE3D); IPR011992 (G3DSA:1.10.238.GENE3D); PTHR12294 (PANTHER); PTHR12294:SF11 (PANTHER); IPR002048 (PROSITE_PROFILES); IPR011992 (SUPERFAMILY); IPR011992 (SUPERFAMILY)	tr|A8JGI1|A8JGI1_CHLRE	Predicted protein	4e-49	tr|D8TNP3|D8TNP3_VOLCA	4e-43	scaffold12.g7991.t1	1e-33
I0YIT9_9CHLO	Cobalamin synthesis protein P47K (Fragment)	4-hydroxytetrahydrobiopterin dehydratase			IPR011629 (SMART); IPR011629 (G3DSA:3.30.1220.GENE3D); IPR003495 (PFAM); IPR011629 (PFAM); IPR027417 (G3DSA:3.40.50.GENE3D); PTHR13748 (PANTHER); PTHR13748:SF4 (PANTHER); IPR027417 (SUPERFAMILY)	tr|A8JGT0|A8JGT0_CHLRE	Predicted protein (Fragment)	1e-115	tr|D8TH37|D8TH37_VOLCA	2e-81	scaffold1.g5800.t1	2e-33	scaffold32_size168507	5e-35
I0YIU1_9CHLO	Uncharacterized protein	Tbc2 translation chloroplastic	C:nucleus; C:membrane; C:integral component of membrane; F:protein kinase activity; P:protein phosphorylation		IPR013584 (SMART); IPR013584 (PFAM); PTHR21228 (PANTHER); IPR013584 (PROSITE_PROFILES)	tr|A8JA15|A8JA15_CHLRE	Predicted protein of CLR family	8e-26	tr|D8TMF6|D8TMF6_VOLCA	4e-35	scaffold11.g3995.t1	2e-31	scaffold11_size1415723	4e-16
I0YIU3_9CHLO	MA3-domain-containing protein	Programmed cell death 4	F:binding		IPR003891 (SMART); IPR003891 (PFAM); IPR016021 (G3DSA:1.25.40.GENE3D); PTHR12626 (PANTHER); PTHR12626:SF0 (PANTHER); IPR003891 (PROSITE_PROFILES); IPR016024 (SUPERFAMILY); IPR016024 (SUPERFAMILY); IPR016024 (SUPERFAMILY); IPR016024 (SUPERFAMILY)	tr|A8J500|A8J500_CHLRE	Predicted protein	5e-58	tr|D8UBQ2|D8UBQ2_VOLCA	3e-122	scaffold12.g7994.t1	1e-87	scaffold12_size2011427	6e-10
I0YIU9_9CHLO	Kinase-like protein	Snf1 kinase	F:nucleotide binding; P:cellular protein modification process; F:kinase activity		IPR000719 (SMART); G3DSA:1.10.510.10 (GENE3D); G3DSA:3.30.200.20 (GENE3D); IPR000719 (PFAM); PTHR24343 (PANTHER); IPR000719 (PROSITE_PROFILES); IPR011009 (SUPERFAMILY)	tr|Q9ZSM9|Q9ZSM9_CHLRE	Snf1-like protein kinase	1e-92	tr|D8TNP5|D8TNP5_VOLCA	2e-91	scaffold5.g965.t1	8e-76	scaffold1_size3450625	2e-28
I0YIV0_9CHLO	Beta-ketoacyl-acyl carrier protein synthase III	beta-ketoacyl-acyl carrier synthase III	C:nucleus; P:lipid metabolic process; P:cellular component organization; C:cytosol; P:biosynthetic process; F:transferase activity; C:plastid	EC:2.3.1.85; EC:2.3.1.41	IPR013751 (PFAM); IPR016039 (G3DSA:3.40.47.GENE3D); IPR013747 (PFAM); IPR004655 (TIGRFAM); IPR016039 (G3DSA:3.40.47.GENE3D); PTHR18919:SF90 (PANTHER); PTHR18919 (PANTHER); IPR004655 (HAMAP); IPR016039 (SUPERFAMILY)	tr|A8JHL7|A8JHL7_CHLRE	Predicted protein (Fragment)	2e-127	tr|D8TXF1|D8TXF1_VOLCA	1e-156	scaffold12.g7979.t1	2e-168	scaffold12_size2011427	2e-20
I0YIV1_9CHLO	Plastocyanin, chloroplastic	chloroplast precursor	C:membrane; P:metabolic process; F:binding; C:plastid; C:thylakoid		IPR002387 (PRINTS); IPR001235 (PRINTS); IPR002387 (TIGRFAM); IPR008972 (G3DSA:2.60.40.GENE3D); IPR000923 (PFAM); PTHR34192:SF2 (PANTHER); PTHR34192 (PANTHER); IPR008972 (SUPERFAMILY)	tr|A8JH68|A8JH68_CHLRE	Plastocyanin, chloroplast	1e-54	tr|D8TK07|D8TK07_VOLCA	3e-59
I0YIV2_9CHLO	NAP-domain-containing protein	nucleosome assembly (ISS)	C:nucleus; P:cellular component organization		IPR002164 (PFAM); PTHR11875:SF7 (PANTHER); IPR002164 (PANTHER); SSF143113 (SUPERFAMILY)	tr|A8J513|A8J513_CHLRE	Nucleosome assembly protein	2e-65	tr|D8UBT5|D8UBT5_VOLCA	2e-69	scaffold12.g8036.t1	2e-41
I0YIV4_9CHLO	Uncharacterized protein	hypothetical protein COCSUDRAFT_45394	F:protein binding; P:response to stress		IPR012416 (PFAM); PTHR31713 (PANTHER); PTHR31713:SF2 (PANTHER)	tr|A8IIJ0|A8IIJ0_CHLRE	Predicted protein	4e-85	tr|D8TJ97|D8TJ97_VOLCA	2e-82	scaffold3.g6569.t1	8e-64	scaffold3_size2545224	2e-06
I0YIV7_9CHLO	Ketoacyl-synt-domain-containing protein	type I polyketide synthase	C:nuclear envelope; F:catalytic activity; P:metabolic process; F:binding; P:transport		IPR020807 (SMART); SM01294 (SMART); IPR020841 (SMART); IPR020806 (SMART); SM00822 (SMART); IPR016040 (G3DSA:3.40.50.GENE3D); IPR014031 (PFAM); IPR016039 (G3DSA:3.40.47.GENE3D); IPR016039 (G3DSA:3.40.47.GENE3D); IPR009081 (G3DSA:1.10.1200.GENE3D); IPR014030 (PFAM); IPR009081 (PFAM); IPR020807 (PFAM); IPR007230 (G3DSA:3.30.1610.GENE3D); IPR007230 (PFAM); IPR013968 (PFAM); IPR009081 (G3DSA:1.10.1200…	tr|A8HZR1|A8HZR1_CHLRE	Type I polyketide synthase	4e-69	tr|D8TZK2|D8TZK2_VOLCA	2e-85	scaffold26.g3362.t1	8e-164	scaffold31_size197302	2e-65
I0YIW0_9CHLO	Ketoacyl-synt-domain-containing protein	type I polyketide synthase	F:catalytic activity; P:metabolic process; F:binding		IPR020806 (SMART); IPR020841 (SMART); IPR014030 (PFAM); IPR014031 (PFAM); IPR009081 (G3DSA:1.10.1200.GENE3D); IPR016039 (G3DSA:3.40.47.GENE3D); IPR016039 (G3DSA:3.40.47.GENE3D); IPR009081 (PFAM); PTHR11712 (PANTHER); PTHR11712:SF285 (PANTHER); IPR009081 (PROSITE_PROFILES); IPR009081 (SUPERFAMILY); IPR016039 (SUPERFAMILY); IPR016039 (SUPERFAMILY)	tr|A8HZR1|A8HZR1_CHLRE	Type I polyketide synthase	7e-60	tr|D8TZK2|D8TZK2_VOLCA	6e-67	scaffold11.g4068.t1	3e-73	scaffold20_size1437327	4e-49
I0YIW6_9CHLO	Aspartate aminotransferase	aspartate chloroplastic	F:protein binding; C:mitochondrion; P:biosynthetic process; F:transferase activity; P:cellular process	EC:2.6.1.9; EC:2.6.1.57; EC:2.6.1.5; EC:2.6.1.1	IPR000796 (PRINTS); IPR015421 (G3DSA:3.40.640.GENE3D); IPR004839 (PFAM); IPR000796 (PANTHER); PTHR11879:SF1 (PANTHER); IPR015424 (SUPERFAMILY)	tr|A8I263|A8I263_CHLRE	Aspartate aminotransferase	0	tr|D8TVZ7|D8TVZ7_VOLCA	0	scaffold1.g5444.t1	0	scaffold1_size3450625	2e-18
I0YIW9_9CHLO	Plastid ribosomal protein S5A small ribosomal subunit	30S ribosomal S5	F:RNA binding; F:structural molecule activity; C:ribosome; P:translation		IPR005324 (PFAM); IPR005712 (TIGRFAM); IPR013810 (PFAM); IPR014720 (G3DSA:3.30.160.GENE3D); IPR014721 (G3DSA:3.30.230.GENE3D); PTHR13718:SF67 (PANTHER); IPR000851 (PANTHER); IPR005712 (HAMAP); IPR013810 (PROSITE_PROFILES); IPR020568 (SUPERFAMILY); SSF54768 (SUPERFAMILY)	tr|Q7Y258|Q7Y258_CHLRE	Ribosomal protein S5	5e-37	tr|D8TTR8|D8TTR8_VOLCA	1e-35	scaffold28.g7588.t1	7e-77	scaffold28_size277716	2e-54
I0YIX3_9CHLO	Glutamine synthetase	glutamine synthetase	F:catalytic activity; P:biosynthetic process; P:cellular process	EC:6.3.1; EC:6.3.1.2	IPR008146 (SMART); IPR014746 (G3DSA:3.30.590.GENE3D); PTHR20852:SF50 (PANTHER); PTHR20852 (PANTHER); SSF55931 (SUPERFAMILY); IPR008147 (SUPERFAMILY)	tr|A8I305|A8I305_CHLRE	Glutamine synthetase	2e-119	tr|D8UC50|D8UC50_VOLCA	6e-119	scaffold6.g2861.t1	2e-117	scaffold6_size1922994	1e-27
I0YIX7_9CHLO	Argininosuccinate synthase	argininosuccinate synthase	F:nucleotide binding; F:catalytic activity; P:biosynthetic process; C:plastid; P:cellular process	EC:6.3.4.5	IPR001518 (TIGRFAM); IPR001518 (PFAM); IPR014729 (G3DSA:3.40.50.GENE3D); IPR024074 (G3DSA:3.90.1260.GENE3D); PTHR11587 (PANTHER); PTHR11587:SF2 (PANTHER); IPR023434 (HAMAP); SSF69864 (SUPERFAMILY); SSF52402 (SUPERFAMILY)	tr|A8J506|A8J506_CHLRE	Argininosuccinate synthase	0	tr|D8TV86|D8TV86_VOLCA	0	scaffold12.g7970.t1	0	scaffold12_size2011427	6e-24
I0YIY1_9CHLO	Uncharacterized protein	hypothetical protein COCSUDRAFT_34541	F:DNA binding; F:transcription factor activity, sequence-specific DNA binding; P:biosynthetic process; P:nucleobase-containing compound metabolic process; C:intracellular		IPR004827 (SMART); G3DSA:1.20.5.170 (GENE3D); IPR004827 (PFAM); IPR004827 (PROSITE_PROFILES); SSF57959 (SUPERFAMILY)	tr|A8J894|A8J894_CHLRE	Predicted protein (Fragment)	3e-11	tr|D8UG37|D8UG37_VOLCA	2e-14
I0YIY8_9CHLO	Kinase-like protein	Snf1 kinase	F:nucleotide binding; P:cellular protein modification process; F:kinase activity; C:intracellular		IPR000719 (SMART); G3DSA:3.30.200.20 (GENE3D); IPR000719 (PFAM); G3DSA:1.10.510.10 (GENE3D); PTHR24343 (PANTHER); IPR000719 (PROSITE_PROFILES); IPR011009 (SUPERFAMILY)	tr|Q9ZSM9|Q9ZSM9_CHLRE	Snf1-like protein kinase	2e-106	tr|D8TNP5|D8TNP5_VOLCA	1e-108	scaffold5.g965.t1	8e-93	scaffold1_size3450625	4e-33
I0YIZ1_9CHLO	Uncharacterized protein	signal peptidase complex partial	F:nucleotide binding; F:protein binding; P:cellular protein modification process; F:kinase activity; F:hydrolase activity		G3DSA:3.30.450.20 (GENE3D); IPR000014 (PFAM); G3DSA:3.30.200.20 (GENE3D); IPR003018 (PFAM); G3DSA:1.10.510.10 (GENE3D); IPR001245 (PFAM); IPR029016 (G3DSA:3.30.450.GENE3D); PTHR23257 (PANTHER); IPR000719 (PROSITE_PROFILES); IPR000014 (SUPERFAMILY); IPR011009 (SUPERFAMILY); IPR029016 (SUPERFAMILY)	tr|A8IGG5|A8IGG5_CHLRE	Mixed lineage protein kinase	3e-41	tr|D8TVU7|D8TVU7_VOLCA	6e-39	scaffold2.g7335.t1	2e-29	scaffold2_size3998120	2e-10
I0YIZ6_9CHLO	Kinase-like protein (Fragment)	kinase partial	F:nucleotide binding; P:cellular protein modification process; F:kinase activity		IPR000719 (SMART); IPR001245 (PFAM); G3DSA:1.10.510.10 (GENE3D); PTHR23257 (PANTHER); IPR000719 (PROSITE_PROFILES); IPR011009 (SUPERFAMILY)	tr|A8JCP2|A8JCP2_CHLRE	Predicted protein	4e-31	tr|D8TL14|D8TL14_VOLCA	9e-33	scaffold7.g3741.t1	4e-29	scaffold1_size3450625	9e-08
I0YIZ7_9CHLO	Kinase-like protein (Fragment)	kinase partial	F:nucleotide binding; P:cellular protein modification process; F:kinase activity		IPR001245 (PRINTS); G3DSA:1.10.510.10 (GENE3D); IPR001245 (PFAM); PTHR23257 (PANTHER); IPR000719 (PROSITE_PROFILES); IPR011009 (SUPERFAMILY)	tr|A8I2K1|A8I2K1_CHLRE	Predicted protein	7e-59	tr|D8U978|D8U978_VOLCA	9e-57	scaffold4.g5032.t1	1e-49	scaffold3_size2545224	1e-10
I0YJ04_9CHLO	PRENYLCYSTEINE methylesterase	probable isoprenylcysteine alpha-carbonyl methylesterase ICMEL2	C:membrane; P:metabolic process; F:hydrolase activity		IPR029058 (G3DSA:3.40.50.GENE3D); IPR013094 (PFAM); PTHR23024 (PANTHER); PTHR23024:SF145 (PANTHER); IPR029058 (SUPERFAMILY)	tr|A8JGR9|A8JGR9_CHLRE	Carboxyesterase-related protein (Fragment)	6e-101	tr|D8UAH8|D8UAH8_VOLCA	5e-103	scaffold23.g4145.t1	4e-104	scaffold23_size648937	3e-08
I0YJ07_9CHLO	Uncharacterized protein (Fragment)	transcription factor Pur-alpha 1 isoform X2			IPR006628 (SMART); IPR006628 (PFAM); IPR006628 (PANTHER)	tr|A8J8Z4|A8J8Z4_CHLRE	Predicted protein (Fragment)	6e-26	tr|D8TII4|D8TII4_VOLCA	6e-30
I0YJ10_9CHLO	Uncharacterized protein	hypothetical protein COCSUDRAFT_34555	F:nucleic acid binding		IPR002775 (G3DSA:3.30.110.GENE3D); IPR002775 (PFAM); PTHR31947:SF6 (PANTHER); PTHR31947 (PANTHER); IPR002775 (SUPERFAMILY)	tr|A8J1I6|A8J1I6_CHLRE	Predicted protein	2e-28	tr|D8TL42|D8TL42_VOLCA	3e-30	scaffold11.g3961.t1	5e-13
I0YJ12_9CHLO	Uncharacterized protein (Fragment)	methyltransferase 1	F:nucleic acid binding; F:transferase activity; P:nucleobase-containing compound metabolic process		IPR007757 (PFAM); PTHR13107 (PANTHER); PTHR13107:SF0 (PANTHER); IPR007757 (PROSITE_PROFILES); IPR029063 (SUPERFAMILY)	tr|A8HND4|A8HND4_CHLRE	Predicted protein (Fragment)	4e-32	tr|D8TS32|D8TS32_VOLCA	9e-11
I0YJ13_9CHLO	Alcohol oxidase	choline dehydrogenase	F:nucleotide binding; F:catalytic activity; P:metabolic process		IPR012132 (PIRSF); IPR023753 (G3DSA:3.50.50.GENE3D); IPR007867 (PFAM); IPR000172 (PFAM); PTHR11552 (PANTHER); PTHR11552:SF14 (PANTHER); IPR023753 (SUPERFAMILY); SSF54373 (SUPERFAMILY)	tr|A8JHB7|A8JHB7_CHLRE	Predicted protein	0	tr|D8TNQ4|D8TNQ4_VOLCA	0	scaffold3.g6628.t1	6e-131	scaffold3_size2545224	8e-21
I0YJ14_9CHLO	Magnesium-protoporphyrin IX methyltransferase	magnesium-protoporphyrin IX methyltransferase	C:membrane; P:biosynthetic process; F:transferase activity; C:plastid; P:cellular process	EC:2.1.1.11; EC:2.1.1	IPR029063 (G3DSA:3.40.50.GENE3D); IPR010251 (TIGRFAM); IPR010940 (PFAM); PTHR10108 (PANTHER); PTHR10108:SF721 (PANTHER); IPR010251 (PROSITE_PROFILES); IPR029063 (SUPERFAMILY)	tr|A8JGJ6|A8JGJ6_CHLRE	Mg protoporphyrin IX S-adenosyl methionine O-methyl transferase	4e-110	tr|D8TNN2|D8TNN2_VOLCA	7e-113	scaffold1.g5877.t1	1e-79	scaffold1_size3450625	8e-17
I0YJ15_9CHLO	Catalase	catalase isozyme 1	C:cytoplasm; F:catalytic activity; P:catabolic process; F:binding; P:response to stress; P:cellular process	EC:1.11.1.7; EC:1.11.1.6	IPR018028 (PRINTS); IPR011614 (SMART); IPR024711 (PIRSF); IPR011614 (PFAM); IPR010582 (PFAM); IPR011614 (G3DSA:2.40.180.GENE3D); IPR018028 (PANTHER); PTHR11465:SF3 (PANTHER); IPR018028 (PROSITE_PROFILES); IPR020835 (SUPERFAMILY)	tr|A8J537|A8J537_CHLRE	Catalase	0	tr|D8TV78|D8TV78_VOLCA	0	scaffold12.g7959.t1	3e-72	scaffold12_size2011427	7e-07
I0YJ17_9CHLO	Putative ornithine decarboxylase	ornithine decarboxylase-like	F:catalytic activity; P:biosynthetic process; P:cellular process		IPR000183 (PRINTS); IPR002433 (PRINTS); IPR029066 (G3DSA:3.20.20.GENE3D); IPR022644 (PFAM); IPR009006 (G3DSA:2.40.37.GENE3D); IPR022643 (PFAM); PTHR11482 (PANTHER); PTHR11482:SF6 (PANTHER); IPR029066 (SUPERFAMILY); IPR009006 (SUPERFAMILY)	tr|A8J7E8|A8J7E8_CHLRE	Ornithine decarboxylase 1	1e-115	tr|D8UJ04|D8UJ04_VOLCA	1e-114	scaffold12.g8014.t1	5e-118	scaffold19_size774562	3e-42
I0YJ18_9CHLO	S-adenosylmethionine decarboxylase	S-adenosylmethionine decarboxylase	F:catalytic activity; P:biosynthetic process; P:cellular process	EC:4.1.1.50	IPR018167 (PIRSF); IPR016067 (G3DSA:3.60.90.GENE3D); IPR018167 (TIGRFAM); IPR001985 (PFAM); IPR001985 (PANTHER); IPR016067 (SUPERFAMILY)	tr|Q5K1Y0|Q5K1Y0_CHLRE	S-adenosylmethionine decarboxylase proenzyme	2e-96	tr|D8UGD2|D8UGD2_VOLCA	8e-102	scaffold19.g1750.t1	1e-53	scaffold19_size774562	3e-16
I0YJ19_9CHLO	DUF500-domain-containing protein	DUF500-domain-containing protein	F:binding		IPR000306 (SMART); IPR013083 (G3DSA:3.30.40.GENE3D); IPR007461 (PFAM); IPR000306 (PFAM); PTHR15629 (PANTHER); PTHR15629:SF2 (PANTHER); IPR017455 (PROSITE_PROFILES); IPR011011 (SUPERFAMILY)	tr|A8JB37|A8JB37_CHLRE	Predicted protein	2e-82	tr|D8UFH3|D8UFH3_VOLCA	8e-71	scaffold20.g7669.t1	3e-53	scaffold20_size1437327	5e-34
I0YJ28_9CHLO	Kinase-like protein (Fragment)	kinase partial	F:nucleotide binding; P:cellular protein modification process; F:kinase activity		IPR000719 (SMART); IPR001245 (PFAM); G3DSA:1.10.510.10 (GENE3D); PTHR23257 (PANTHER); IPR000719 (PROSITE_PROFILES); IPR011009 (SUPERFAMILY)	tr|A8JBD4|A8JBD4_CHLRE	Predicted protein (Fragment)	3e-39	tr|D8TL14|D8TL14_VOLCA	2e-34	scaffold7.g3741.t1	2e-31	scaffold2_size3998120	5e-09
I0YJ34_9CHLO	DNA-directed RNA polymerase (Fragment)	DNA-directed RNA polymerase I subunit RPA2-like	F:DNA binding; P:biosynthetic process; F:transferase activity; C:nucleolus; P:nucleobase-containing compound metabolic process	EC:2.7.7.6	IPR007641 (PFAM); IPR009674 (PFAM); G3DSA:3.90.1100.10 (GENE3D); IPR007645 (PFAM); IPR007120 (G3DSA:2.40.270.GENE3D); IPR007120 (PFAM); IPR014724 (G3DSA:2.40.50.GENE3D); IPR015712 (PANTHER); PTHR20856:SF5 (PANTHER); SSF64484 (SUPERFAMILY)	tr|A8I793|A8I793_CHLRE	DNA-directed RNA polymerase	0	tr|D8U8Q8|D8U8Q8_VOLCA	0	scaffold1.g5708.t1	1e-95	scaffold41_size205970	3e-19
I0YJ39_9CHLO	Uncharacterized protein	aarF domain-containing kinase	F:ATP binding; C:membrane; C:integral component of membrane; F:protein kinase activity; P:phosphorylation; P:protein phosphorylation; F:kinase activity		IPR004147 (PFAM); G3DSA:1.10.510.10 (GENE3D); PTHR10566 (PANTHER); PTHR10566:SF72 (PANTHER); IPR011009 (SUPERFAMILY)	tr|A8IMV6|A8IMV6_CHLRE	ABC1/COQ8 ser/thr kinase	4e-26	tr|D8TKA0|D8TKA0_VOLCA	2e-34	scaffold3.g6757.t1	8e-38
I0YJ43_9CHLO	Uncharacterized protein	Heterogeneous nuclear ribonucleo A1-like 2	F:nucleotide binding; F:nucleic acid binding		IPR000504 (SMART); IPR000504 (PFAM); IPR012677 (G3DSA:3.30.70.GENE3D); PTHR24012 (PANTHER); IPR000504 (PROSITE_PROFILES); IPR012677 (SUPERFAMILY); IPR012677 (SUPERFAMILY)	tr|A8J8S4|A8J8S4_CHLRE	RNA binding protein (Fragment)	2e-16	tr|D8TWE2|D8TWE2_VOLCA	8e-18	scaffold2.g7211.t1	6e-28	scaffold4_size2474039	4e-10
I0YJ45_9CHLO	ARID-like protein	high mobility group B 9	F:DNA binding		SM01014 (SMART); IPR001606 (SMART); IPR009071 (SMART); IPR001606 (PFAM); IPR009071 (G3DSA:1.10.30.GENE3D); IPR001606 (G3DSA:1.10.150.GENE3D); IPR009071 (PFAM); PTHR13711:SF202 (PANTHER); PTHR13711 (PANTHER); IPR001606 (PROSITE_PROFILES); IPR009071 (PROSITE_PROFILES); IPR001606 (SUPERFAMILY); IPR009071 (SUPERFAMILY)	tr|A8HSE8|A8HSE8_CHLRE	HMGB protein	2e-17	tr|D8UEP8|D8UEP8_VOLCA	1e-11	scaffold20.g7650.t1	6e-11
I0YJ46_9CHLO	3-oxoacyl-[acyl-carrier-protein] synthase	3-oxoacyl-[acyl-carrier- ] synthase chloroplastic	P:response to abiotic stimulus; P:lipid metabolic process; C:cytosol; P:biosynthetic process; F:transferase activity; C:plastid; P:cellular process; P:response to stress	EC:2.3.1.85; EC:2.3.1.41	IPR020841 (SMART); IPR017568 (PIRSF); IPR016039 (G3DSA:3.40.47.GENE3D); IPR017568 (TIGRFAM); IPR014031 (PFAM); IPR016039 (G3DSA:3.40.47.GENE3D); IPR014030 (PFAM); PTHR11712 (PANTHER); PTHR11712:SF287 (PANTHER); IPR016039 (SUPERFAMILY); IPR016039 (SUPERFAMILY)	tr|A8JCK1|A8JCK1_CHLRE	3-oxoacyl-[acyl-carrier-protein] synthase	0	tr|D8TXC7|D8TXC7_VOLCA	0	scaffold12.g7954.t1	0	scaffold3_size2545224	3e-28
I0YJ53_9CHLO	Copine-domain-containing protein	BONZAI 1-like isoform X2	F:protein binding		IPR000008 (G3DSA:2.60.40.GENE3D); IPR010734 (PFAM); IPR000008 (PFAM); PTHR10857 (PANTHER); PTHR10857:SF0 (PANTHER); IPR000008 (SUPERFAMILY)	tr|A8IES0|A8IES0_CHLRE	Predicted protein (Fragment)	2e-45	tr|D8UBC6|D8UBC6_VOLCA	1e-39	scaffold24.g2975.t1	2e-68
I0YJ54_9CHLO	Rab8/RabE-family small GTPase	ras-related RABE1c-like	F:nucleotide binding; P:signal transduction; P:lipid metabolic process; P:transport; C:intracellular; F:hydrolase activity	EC:3.1; EC:3.1.4.12; EC:3.1.1	PR00449 (PRINTS); SM00176 (SMART); SM00175 (SMART); SM00173 (SMART); SM00174 (SMART); IPR001806 (PFAM); IPR005225 (TIGRFAM); IPR027417 (G3DSA:3.40.50.GENE3D); PTHR24073:SF541 (PANTHER); PTHR24073 (PANTHER); PS51419 (PROSITE_PROFILES); IPR027417 (SUPERFAMILY)	tr|A8JHI5|A8JHI5_CHLRE	Small rab-related GTPase	9e-94	tr|D8UA71|D8UA71_VOLCA	1e-101	scaffold1.g5509.t1	1e-107	scaffold1_size3450625	2e-25
I0YJ55_9CHLO	DUF1084-domain-containing protein	tobamovirus multiplication 1-like	C:membrane		IPR009457 (PFAM); PTHR31142:SF3 (PANTHER); PTHR31142 (PANTHER)	tr|A8IL75|A8IL75_CHLRE	Predicted protein	5e-107	tr|D8TPE6|D8TPE6_VOLCA	2e-105	scaffold21.g2095.t1	3e-120	scaffold21_size696144	1e-30
I0YJ56_9CHLO	S-adenosyl-L-methionine-dependent methyltransferase (Fragment)	DNA (cytosine-5)-methyltransferase 1-like	F:chromatin binding; F:transferase activity; P:DNA metabolic process; C:intracellular	EC:2.1.1.37; EC:2.1.1	IPR001525 (PRINTS); IPR029063 (G3DSA:3.40.50.GENE3D); G3DSA:3.90.120.10 (GENE3D); IPR029063 (PFAM); PTHR10629 (PANTHER); PTHR10629:SF11 (PANTHER); IPR001525 (PROSITE_PROFILES); IPR029063 (SUPERFAMILY)	tr|A8I196|A8I196_CHLRE	Cytosine-C5 specific DNA methyltransferase	0	tr|Q208B6|Q208B6_VOLCA	0	scaffold1.g5231.t1	0	scaffold1_size3450625	5e-34
I0YJ57_9CHLO	Uncharacterized protein	glycosyltransferase family 34	C:membrane; F:transferase activity		IPR029044 (G3DSA:3.90.550.GENE3D); IPR008630 (PFAM); PTHR31306 (PANTHER); IPR029044 (SUPERFAMILY)	tr|A8HQK9|A8HQK9_CHLRE	Protein with potential galactosyl transferase activity	5e-14	tr|D8TL87|D8TL87_VOLCA	1e-25
I0YJ67_9CHLO	S-adenosyl-L-methionine-dependent methyltransferase (Fragment)	DNA (cytosine-5)-methyltransferase 1-like	P:metabolic process; F:transferase activity		IPR029063 (PFAM); G3DSA:3.90.120.10 (GENE3D); IPR029063 (G3DSA:3.40.50.GENE3D); PTHR10629 (PANTHER); PTHR10629:SF28 (PANTHER); IPR001525 (PROSITE_PROFILES); IPR029063 (SUPERFAMILY)	tr|A8I196|A8I196_CHLRE	Cytosine-C5 specific DNA methyltransferase	7e-33	tr|Q208B6|Q208B6_VOLCA	2e-18	scaffold4.g4866.t1	2e-54	scaffold4_size2474039	9e-09
I0YJ68_9CHLO	Aldehyde dehydrogenase	aldehyde dehydrogenase family 2 member mitochondrial-like	P:carbohydrate metabolic process; P:generation of precursor metabolites and energy; F:catalytic activity; P:catabolic process; P:lipid metabolic process; P:biosynthetic process; P:nucleobase-containing compound metabolic process	EC:1.2.1.3	IPR016162 (G3DSA:3.40.605.GENE3D); IPR016163 (G3DSA:3.40.309.GENE3D); IPR015590 (PFAM); PTHR11699:SF211 (PANTHER); PTHR11699 (PANTHER); IPR016161 (SUPERFAMILY)	tr|A8IJ19|A8IJ19_CHLRE	Aldehyde dehydrogenase	0	tr|D8TN65|D8TN65_VOLCA	0	scaffold12.g7910.t1	1e-164	scaffold5_size2028652	2e-12
I0YJ71_9CHLO	Aldehyde dehydrogenase	aldehyde dehydrogenase family 2 member mitochondrial-like	P:carbohydrate metabolic process; P:generation of precursor metabolites and energy; F:catalytic activity; P:catabolic process; P:lipid metabolic process; P:biosynthetic process; P:nucleobase-containing compound metabolic process	EC:1.2.1.3	IPR016162 (G3DSA:3.40.605.GENE3D); IPR015590 (PFAM); IPR016163 (G3DSA:3.40.309.GENE3D); PTHR11699:SF211 (PANTHER); PTHR11699 (PANTHER); IPR016161 (SUPERFAMILY)	tr|A8IJ19|A8IJ19_CHLRE	Aldehyde dehydrogenase	0	tr|D8TN65|D8TN65_VOLCA	0	scaffold12.g7910.t1	3e-160	scaffold5_size2028652	2e-11
I0YJ72_9CHLO	Uncharacterized protein	P-loop containing nucleoside triphosphate hydrolase partial	F:nucleotide binding; P:cellular protein modification process; F:hydrolase activity	EC:3.1.3.16; EC:3.6.1; EC:3.6.1.3; EC:3.1; EC:3.1.3.41; EC:3.6.1.15	IPR027417 (G3DSA:3.40.50.GENE3D); PTHR19211:SF58 (PANTHER); PTHR19211 (PANTHER); IPR027417 (SUPERFAMILY)	tr|A8I2H7|A8I2H7_CHLRE	Predicted protein	2e-11	tr|D8TY99|D8TY99_VOLCA	4e-13	scaffold2.g7453.t1	7e-19	scaffold2_size3998120	2e-09
I0YJ73_9CHLO	Uncharacterized protein	alpha beta-hydrolase	C:membrane; P:lipid metabolic process; F:hydrolase activity		IPR029058 (G3DSA:3.40.50.GENE3D); IPR002921 (PFAM); PTHR21493 (PANTHER); IPR029058 (SUPERFAMILY)	tr|D5LAW3|D5LAW3_CHLRE	LPS1p	1e-40	tr|D8TLX4|D8TLX4_VOLCA	5e-55	scaffold3.g6490.t1	6e-81	scaffold3_size2545224	3e-06
I0YJ75_9CHLO	DEAD-domain-containing protein	DEAD-box ATP-dependent RNA helicase chloroplastic	F:nucleotide binding; C:nucleus; F:RNA binding; C:plastid; F:hydrolase activity	EC:3.6.1; EC:3.6.1.15	IPR014001 (SMART); IPR001650 (SMART); IPR012562 (PFAM); IPR027417 (G3DSA:3.40.50.GENE3D); IPR001650 (PFAM); IPR011545 (PFAM); IPR027417 (G3DSA:3.40.50.GENE3D); PTHR24031:SF155 (PANTHER); PTHR24031 (PANTHER); IPR001650 (PROSITE_PROFILES); IPR014001 (PROSITE_PROFILES); IPR014014 (PROSITE_PROFILES); IPR012677 (SUPERFAMILY); IPR027417 (SUPERFAMILY)	tr|A8J6S5|A8J6S5_CHLRE	Predicted protein (Fragment)	3e-138	tr|D8U7E7|D8U7E7_VOLCA	4e-143	scaffold2.g7182.t1	0	scaffold37_size123908	1e-51
I0YJ76_9CHLO	Uncharacterized protein	AAA+-type ATPase (ISS)	C:nucleus; F:DNA binding; F:transcription factor activity, sequence-specific DNA binding; P:multicellular organism development; P:biosynthetic process; P:nucleobase-containing compound metabolic process		IPR001471 (SMART); IPR001471 (PFAM); IPR018962 (PFAM); IPR001471 (G3DSA:3.30.730.GENE3D); PTHR32467:SF15 (PANTHER); IPR031112 (PANTHER); IPR001471 (PROSITE_PROFILES); IPR001878 (PROSITE_PROFILES); IPR001878 (SUPERFAMILY); IPR016177 (SUPERFAMILY)	tr|A8J230|A8J230_CHLRE	Predicted protein	4e-39	tr|D8UJ99|D8UJ99_VOLCA	5e-35	scaffold2.g7238.t1	4e-19	scaffold4_size2474039	2e-09
I0YJ79_9CHLO	WD40 repeat-like protein	glutamate-rich WD repeat-containing 1	C:nucleus; F:protein binding		IPR020472 (PRINTS); IPR001680 (SMART); IPR001680 (PFAM); IPR022052 (PFAM); IPR015943 (G3DSA:2.130.10.GENE3D); PTHR22850:SF6 (PANTHER); PTHR22850 (PANTHER); IPR001680 (PROSITE_PROFILES); IPR017986 (PROSITE_PROFILES); IPR017986 (SUPERFAMILY)	tr|A8J6L8|A8J6L8_CHLRE	Predicted protein	4e-136	tr|D8TJM9|D8TJM9_VOLCA	4e-166	scaffold3.g6376.t1	3e-161	scaffold3_size2545224	6e-43
I0YJ80_9CHLO	Uncharacterized protein	hypothetical protein COCSUDRAFT_60117			no IPS match	tr|A8I2Y8|A8I2Y8_CHLRE	Predicted protein	2e-78	tr|D8U3P6|D8U3P6_VOLCA	8e-88	scaffold8.g1445.t1	2e-40	scaffold8_size1730130	3e-10
I0YJ83_9CHLO	S-adenosyl-L-methionine-dependent methyltransferase	methyltransferase 5	F:nucleic acid binding; P:metabolic process; F:transferase activity		IPR029063 (G3DSA:3.40.50.GENE3D); IPR007848 (PFAM); PTHR23290 (PANTHER); IPR029063 (SUPERFAMILY)	tr|A8IZ01|A8IZ01_CHLRE	Predicted protein (Fragment)	3e-87	tr|D8U718|D8U718_VOLCA	3e-94	scaffold34.g4518.t1	7e-73	scaffold34_size139598	3e-12
I0YJ85_9CHLO	Iron-sulfur cluster assembly protein IscA	Iron-sulfur assembly -like mitochondrial	P:protein metabolic process; C:mitochondrion; F:structural molecule activity; P:cellular component organization; P:biosynthetic process; F:binding		IPR016092 (TIGRFAM); IPR000361 (G3DSA:2.60.300.GENE3D); IPR000361 (PFAM); PTHR10072:SF41 (PANTHER); PTHR10072 (PANTHER); IPR000361 (SUPERFAMILY)	tr|Q944M8|Q944M8_CHLRE	Iron-sulfur cluster assembly protein	5e-60	tr|D8U7Q8|D8U7Q8_VOLCA	1e-53	scaffold34.g4519.t1	9e-55	scaffold34_size139598	3e-12
I0YJ87_9CHLO	Sec7-domain-containing protein	ARF guanine-nucleotide exchange factor GNL2	C:cytoplasm; P:signal transduction; C:Golgi apparatus; P:transport; F:molecular_function		IPR000904 (SMART); IPR000904 (PFAM); G3DSA:1.10.220.20 (GENE3D); IPR023394 (G3DSA:1.10.1000.GENE3D); PTHR10663 (PANTHER); PTHR10663:SF134 (PANTHER); IPR000904 (PROSITE_PROFILES); IPR000904 (SUPERFAMILY)	tr|A8JCM5|A8JCM5_CHLRE	EMB30/GNOM-like protein	4e-42	tr|D8TPX3|D8TPX3_VOLCA	2e-42	scaffold9.g3135.t1	7e-27	scaffold9_size1652423	1e-07
I0YJ89_9CHLO	Uncharacterized protein	MULTISPECIES: N-acetyltransferase	P:biosynthetic process; F:transferase activity; P:cellular process	EC:2.3.1	IPR000182 (PFAM); IPR016181 (G3DSA:3.40.630.GENE3D); IPR000182 (PROSITE_PROFILES); IPR016181 (SUPERFAMILY)	tr|A8HUK8|A8HUK8_CHLRE	Predicted protein	1e-22	tr|D8TZ90|D8TZ90_VOLCA	1e-15	scaffold13.g254.t1	1e-12
I0YJ90_9CHLO	GTP-binding protein Obg/CgtA	GTP-binding Obg	F:nucleotide binding; F:hydrolase activity	EC:3.6.1; EC:3.6.1.15	IPR006073 (PRINTS); IPR014100 (PIRSF); IPR027417 (G3DSA:3.40.50.GENE3D); IPR006169 (G3DSA:2.70.210.GENE3D); IPR006169 (PFAM); IPR006073 (PFAM); PTHR11702 (PANTHER); IPR014100 (PTHR11702:PANTHER); IPR031167 (PROSITE_PROFILES); IPR027417 (SUPERFAMILY); IPR006169 (SUPERFAMILY)	tr|A8IZY1|A8IZY1_CHLRE	Predicted protein	3e-76	tr|D8U949|D8U949_VOLCA	8e-96	scaffold18.g2031.t1	6e-47	scaffold18_size793176	2e-20
I0YJ91_9CHLO	Arginase/deacetylase	histone deacetylase 14 isoform X1	F:protein binding; C:cytoskeleton; C:cytoplasm; F:hydrolase activity		IPR000286 (PRINTS); IPR023801 (PFAM); IPR023801 (G3DSA:3.40.800.GENE3D); PTHR10625:SF104 (PANTHER); IPR000286 (PANTHER); SSF52768 (SUPERFAMILY)	tr|A8J2H9|A8J2H9_CHLRE	Histone deacetylase (Fragment)	4e-68	tr|D8UI22|D8UI22_VOLCA	2e-57	scaffold6.g2887.t1	2e-99	scaffold29_size256459	9e-35
I0YJ92_9CHLO	Aldehyde dehydrogenase	aldehyde dehydrogenase	P:carbohydrate metabolic process; P:generation of precursor metabolites and energy; F:catalytic activity; P:catabolic process; C:mitochondrion; P:lipid metabolic process; P:biosynthetic process; F:binding; P:nucleobase-containing compound metabolic process; C:plastid	EC:1.5.1.12; EC:1.2.1.3; EC:1.2.1	IPR016162 (G3DSA:3.40.605.GENE3D); IPR015590 (PFAM); IPR016163 (G3DSA:3.40.309.GENE3D); PTHR11699:SF148 (PANTHER); PTHR11699 (PANTHER); IPR016161 (SUPERFAMILY)	tr|A8J5Z8|A8J5Z8_CHLRE	Aldehyde dehydrogenase	0	tr|D8UHH5|D8UHH5_VOLCA	0	scaffold2.g7282.t1	0	scaffold2_size3998120	3e-14
I0YJ93_9CHLO	Uncharacterized protein	40S ribosomal S10	F:structural molecule activity; P:cellular component organization; C:cytosol; C:ribosome		IPR005326 (PFAM); PTHR12146 (PANTHER)	tr|A8J4Q3|A8J4Q3_CHLRE	Ribosomal protein S10	4e-70	tr|D8U934|D8U934_VOLCA	1e-69	scaffold2.g7232.t1	1e-65	scaffold2_size3998120	9e-13
I0YJ94_9CHLO	Brix-domain-containing protein (Fragment)	Peter Pan	F:RNA binding; P:cellular component organization; C:intracellular		IPR007109 (SMART); IPR007109 (PFAM); PTHR12661 (PANTHER); IPR007109 (PROSITE_PROFILES)	tr|A8HZV5|A8HZV5_CHLRE	Predicted protein	1e-99	tr|D8TUL8|D8TUL8_VOLCA	3e-136	scaffold2.g7231.t1	2e-78	scaffold2_size3998120	2e-20
I0YJ97_9CHLO	Uncharacterized protein	Transmembrane 45B	C:membrane		IPR006904 (PFAM); IPR006904 (PANTHER)	tr|A8INX9|A8INX9_CHLRE	Flagellar/basal body protein (Fragment)	1e-22	tr|D8UJB0|D8UJB0_VOLCA	1e-36	scaffold6.g2855.t1	7e-52	scaffold6_size1922994	8e-08
I0YJ99_9CHLO	Uncharacterized protein	hypothetical protein COCSUDRAFT_34498	F:binding; P:transport		G3DSA:3.30.70.100 (GENE3D); IPR006121 (PROSITE_PROFILES); IPR006121 (SUPERFAMILY)	tr|A8IX44|A8IX44_CHLRE	Predicted protein	8e-15	tr|D8UGA2|D8UGA2_VOLCA	3e-12
I0YJA2_9CHLO	Carbonic anhydrase	carbonic anhydrase	F:catalytic activity; P:metabolic process; F:binding; P:cellular process	EC:4.2.1.1	IPR001765 (SMART); IPR001765 (G3DSA:3.40.1050.GENE3D); IPR001765 (PFAM); PTHR11002:SF20 (PANTHER); IPR001765 (PANTHER); IPR001765 (SUPERFAMILY)	tr|A7UCH8|A7UCH8_CHLRE	CAH7	5e-66	tr|D8TXI1|D8TXI1_VOLCA	8e-66	scaffold23.g4090.t1	2e-61	scaffold39_size111754	7e-17
I0YJA3_9CHLO	Oxidoreductase	3-ketoacyl-ACP reductase	F:ATP binding; F:3-oxoacyl-[acyl-carrier-protein] reductase (NADPH) activity; F:oxidoreductase activity; P:oxidation-reduction process; F:protein kinase activity; P:protein phosphorylation		IPR002347 (PRINTS); IPR002347 (PRINTS); IPR016040 (G3DSA:3.40.50.GENE3D); IPR002347 (PFAM); IPR002347 (PANTHER); IPR016040 (SUPERFAMILY)	tr|A8JDL8|A8JDL8_CHLRE	Predicted protein	3e-12	tr|D8UAH9|D8UAH9_VOLCA	5e-12	scaffold10.g2485.t1	2e-32	scaffold56_size38850	3e-10
I0YJA4_9CHLO	Nucleotide-sugar transporter	CMP-sialic acid transporter 2	C:cytoplasm; C:membrane; C:Golgi apparatus; F:transporter activity		IPR007271 (PIRSF); IPR007271 (PFAM); IPR007271 (PANTHER); PTHR10231:SF25 (PANTHER); SSF103481 (SUPERFAMILY)	tr|A8JEJ7|A8JEJ7_CHLRE	UDP galactose transporter	4e-60	tr|D8UDS5|D8UDS5_VOLCA	7e-82	scaffold14.g1280.t1	1e-153	scaffold14_size1568905	6e-20
I0YJA5_9CHLO	Kinase-like protein	mitogen-activated kinase kinase 3	F:nucleotide binding; F:DNA binding; P:cellular protein modification process; P:biosynthetic process; F:signal transducer activity; F:kinase activity; P:nucleobase-containing compound metabolic process; C:intracellular	EC:2.7.11	IPR002853 (SMART); IPR000719 (SMART); IPR032710 (G3DSA:3.10.450.GENE3D); G3DSA:1.10.510.10 (GENE3D); IPR013083 (G3DSA:3.30.40.GENE3D); G3DSA:3.30.200.20 (GENE3D); IPR000719 (PFAM); PTHR24361:SF408 (PANTHER); PTHR24361 (PANTHER); IPR000719 (PROSITE_PROFILES); IPR018222 (PROSITE_PROFILES); IPR017919 (PROSITE_PROFILES); SSF57783 (SUPERFAMILY); IPR032710 (SUPERFAMILY); IPR011009 (SUPERFAMILY)	tr|A8HYY7|A8HYY7_CHLRE	Mitogen-activated protein kinase kinase 1	6e-151	tr|D8TMB5|D8TMB5_VOLCA	6e-51	scaffold20.g7812.t1	2e-134	scaffold20_size1437327	2e-27
I0YJA6_9CHLO	SUMO-conjugating enzyme	SUMO-conjugating enzyme SCE1	F:nucleotide binding; C:nucleus; F:protein binding; C:cytoplasm; P:cellular protein modification process; F:transferase activity		SM00212 (SMART); IPR000608 (PFAM); IPR016135 (G3DSA:3.10.110.GENE3D); PTHR24067:SF112 (PANTHER); PTHR24067 (PANTHER); IPR000608 (PROSITE_PROFILES); IPR016135 (SUPERFAMILY)	tr|A8J0P9|A8J0P9_CHLRE	SUMO-conjugating enzyme	2e-69	tr|D8U6Q4|D8U6Q4_VOLCA	1e-69	scaffold9.g2996.t1	3e-42	scaffold9_size1652423	3e-16
I0YJA9_9CHLO	Uncharacterized protein (Fragment)	zinc finger CCCH domain-containing 29	F:binding		IPR000571 (SMART); IPR000571 (G3DSA:4.10.1000.GENE3D); IPR000571 (PFAM); PTHR14493 (PANTHER); PTHR14493:SF41 (PANTHER); IPR000571 (PROSITE_PROFILES); IPR000571 (SUPERFAMILY)	tr|A8J2X2|A8J2X2_CHLRE	Predicted protein (Fragment)	7e-35	tr|D8UIN8|D8UIN8_VOLCA	8e-38	scaffold2.g7240.t1	3e-35	scaffold2_size3998120	1e-33
I0YJB0_9CHLO	L domain-like protein	L domain	F:protein binding; C:membrane		PR00019 (PRINTS); IPR003591 (SMART); G3DSA:2.60.120.380 (GENE3D); IPR001611 (PFAM); IPR032675 (G3DSA:3.80.10.GENE3D); PTHR27000 (PANTHER); IPR032675 (SUPERFAMILY)	tr|A8J370|A8J370_CHLRE	Predicted protein	4e-34	tr|D8U7M1|D8U7M1_VOLCA	1e-23	scaffold18.g1951.t1	2e-29	scaffold16_size857609	4e-15
I0YJB2_9CHLO	Uncharacterized protein (Fragment)	hypothetical protein COCSUDRAFT_5974, partial			IPR001453 (SMART); IPR001453 (G3DSA:3.40.980.GENE3D); IPR001453 (PFAM); PTHR23293 (PANTHER); PTHR23293:SF5 (PANTHER); IPR001453 (SUPERFAMILY)	tr|A8HQ78|A8HQ78_CHLRE	Predicted protein	4e-99	tr|D8UJE1|D8UJE1_VOLCA	2e-93	scaffold3.g6355.t1	2e-69	scaffold37_size123908	1e-15
I0YJB4_9CHLO	Uncharacterized protein	hypothetical protein COCSUDRAFT_38586			G3DSA:3.10.20.90 (GENE3D); PF13881 (PFAM); IPR029071 (SUPERFAMILY)	tr|A8JCI6|A8JCI6_CHLRE	Predicted protein (Fragment)	1e-78	tr|D8UG92|D8UG92_VOLCA	2e-81	scaffold1.g5694.t1	8e-61	scaffold1_size3450625	7e-22
I0YJB7_9CHLO	Clavaminate synthase-like protein	Bifunctional arginine demethylase and lysyl-hydroxylase JMJD6	F:catalytic activity; P:metabolic process		IPR003347 (SMART); PF13621 (PFAM); G3DSA:2.60.120.650 (GENE3D); PTHR12480 (PANTHER); PTHR12480:SF5 (PANTHER); IPR003347 (PROSITE_PROFILES); SSF51197 (SUPERFAMILY)	tr|A8J7U9|A8J7U9_CHLRE	Predicted protein (Fragment)	1e-143	tr|D8U7Q3|D8U7Q3_VOLCA	4e-93	scaffold2.g7253.t1	2e-104	scaffold2_size3998120	1e-13
I0YJB8_9CHLO	Uncharacterized protein	hypothetical protein COCSUDRAFT_68226			IPR019494 (SMART); IPR013702 (SMART); IPR013702 (PFAM); IPR019494 (PFAM); PTHR14939 (PANTHER); PTHR14939:SF5 (PANTHER)	tr|A8I6U8|A8I6U8_CHLRE	Predicted protein	5e-59	tr|D8U8Z4|D8U8Z4_VOLCA	7e-70	scaffold2.g7179.t1	8e-53	scaffold2_size3998120	4e-07
I0YJC1_9CHLO	Uncharacterized protein	GDA1 CD39 nucleoside phosphatase family	P:multicellular organism development; P:catabolic process; C:membrane; P:cellular process; F:hydrolase activity	EC:3.1.1.14; EC:3.1.1.1	IPR017395 (PFAM); IPR000407 (PFAM); IPR029058 (G3DSA:3.40.50.GENE3D); IPR000407 (PANTHER); PTHR11782:SF3 (PANTHER); IPR029058 (SUPERFAMILY)	tr|A8IEM4|A8IEM4_CHLRE	Predicted protein	2e-38	tr|D8TK49|D8TK49_VOLCA	4e-33	scaffold2.g7229.t1	1e-66	scaffold2_size3998120	2e-26
I0YJC2_9CHLO	Uncharacterized protein	APETALA2 2 (ISS)	C:nucleus; F:DNA binding; F:transcription factor activity, sequence-specific DNA binding; P:multicellular organism development; P:biosynthetic process; P:nucleobase-containing compound metabolic process		IPR001471 (SMART); IPR001471 (PFAM); IPR001471 (G3DSA:3.30.730.GENE3D); PTHR32467:SF15 (PANTHER); IPR031112 (PANTHER); IPR001471 (PROSITE_PROFILES); IPR016177 (SUPERFAMILY); IPR016177 (SUPERFAMILY)	tr|A8JD02|A8JD02_CHLRE	Predicted protein (Fragment)	2e-13	tr|D8UFK5|D8UFK5_VOLCA	4e-15	scaffold3.g6643.t1	1e-17
I0YJC9_9CHLO	Kinase-like protein (Fragment)	kinase superfamily with octicosapeptide Phox Bem1p domain-containing	F:nucleotide binding; P:cellular protein modification process; F:kinase activity		IPR001245 (PRINTS); PIRSF000654 (PIRSF); IPR000719 (SMART); G3DSA:3.30.200.20 (GENE3D); IPR001245 (PFAM); G3DSA:1.10.510.10 (GENE3D); PTHR23257:SF537 (PANTHER); PTHR23257 (PANTHER); IPR000719 (PROSITE_PROFILES); IPR011009 (SUPERFAMILY)	tr|A8JEH7|A8JEH7_CHLRE	Predicted protein (Fragment)	3e-78	tr|D8UDT0|D8UDT0_VOLCA	2e-69	scaffold1.g5538.t1	9e-44	scaffold6_size1922994	2e-11
I0YJD2_9CHLO	Uncharacterized protein	splicing suppressor of white-apricot homolog isoform X1	F:RNA binding; P:nucleobase-containing compound metabolic process		IPR019147 (SMART); IPR000061 (SMART); IPR000061 (PFAM); IPR019147 (PFAM); PTHR13161 (PANTHER); PTHR13161:SF15 (PANTHER); IPR000061 (PROSITE_PROFILES); IPR000061 (SUPERFAMILY); IPR000061 (SUPERFAMILY)	tr|A8J789|A8J789_CHLRE	Predicted protein (Fragment)	4e-16	tr|D8UER0|D8UER0_VOLCA	2e-12	scaffold14.g1338.t1	4e-15	scaffold14_size1568905	7e-08
I0YJD3_9CHLO	Uncharacterized protein	vacuolar-sorting receptor 3-like	C:membrane; F:binding		IPR003137 (PFAM); G3DSA:3.50.30.30 (GENE3D); G3DSA:2.10.25.10 (GENE3D); PTHR22765:SF56 (PANTHER); PTHR22765 (PANTHER); SSF57196 (SUPERFAMILY); SSF52025 (SUPERFAMILY)	tr|A8JEJ5|A8JEJ5_CHLRE	Vacuolar sorting receptor	1e-116	tr|D8UDS3|D8UDS3_VOLCA	1e-95	scaffold14.g1340.t1	0	scaffold14_size1568905	3e-32
I0YJD4_9CHLO	MFS general substrate transporter	MFS transporter	C:membrane; P:transport		IPR011701 (PFAM); G3DSA:1.20.1250.20 (GENE3D); PTHR23520:SF5 (PANTHER); PTHR23520 (PANTHER); IPR020846 (PROSITE_PROFILES); IPR020846 (SUPERFAMILY)	tr|Q8L6U4|Q8L6U4_CHLRE	Putative transporter	1e-69	tr|D8TQQ0|D8TQQ0_VOLCA	3e-126
I0YJD5_9CHLO	Patatin-domain-containing protein	triacylglycerol lipase SDP1-like	P:catabolic process; C:membrane; P:lipid metabolic process; P:cellular process; F:hydrolase activity	EC:3.1.1; EC:3.1.1.1; EC:3.1.1.3	IPR002641 (PFAM); G3DSA:3.40.1090.10 (GENE3D); IPR021771 (PFAM); PTHR14226 (PANTHER); PTHR14226:SF30 (PANTHER); IPR016035 (SUPERFAMILY)	tr|A8IQP6|A8IQP6_CHLRE	Predicted protein (Fragment)	4e-167	tr|D8TT81|D8TT81_VOLCA	6e-163	scaffold17.g538.t1	1e-85	scaffold17_size836474	6e-10
I0YJD6_9CHLO	T-complex protein 1 beta subunit	T-complex 1 subunit beta	F:nucleotide binding; F:protein binding; C:cell wall; C:cytosol; C:plasma membrane; P:cellular process		IPR017998 (PRINTS); IPR002423 (PFAM); IPR027413 (G3DSA:1.10.560.GENE3D); IPR027410 (G3DSA:3.30.260.GENE3D); IPR027409 (G3DSA:3.50.7.GENE3D); IPR012716 (TIGRFAM); PTHR11353 (PANTHER); PTHR11353:SF23 (PANTHER); SSF48592 (SUPERFAMILY); IPR027409 (SUPERFAMILY); SSF54849 (SUPERFAMILY)	tr|A8J524|A8J524_CHLRE	T-complex protein 1, beta subunit	0	tr|D8UBW1|D8UBW1_VOLCA	0	scaffold12.g7942.t1	0	scaffold12_size2011427	2e-18
I0YJE2_9CHLO	DNA-directed RNA polymerase II, 36 kDa polypeptide	DNA-directed RNA polymerases IV and V subunit 3	F:DNA binding; F:protein binding; P:biosynthetic process; F:transferase activity; P:nucleobase-containing compound metabolic process; C:nucleoplasm	EC:2.7.7.6	IPR011263 (SMART); IPR009025 (PFAM); G3DSA:3.30.1360.10 (GENE3D); IPR011262 (PFAM); IPR011262 (G3DSA:2.170.120.GENE3D); PTHR11800 (PANTHER); PTHR11800:SF2 (PANTHER); IPR009025 (SUPERFAMILY); IPR011262 (SUPERFAMILY)	tr|A8ICX5|A8ICX5_CHLRE	DNA-directed RNA polymerase II, 36 kDa polypeptide (Fragment)	2e-88	tr|D8TPK6|D8TPK6_VOLCA	1e-87	scaffold2.g7108.t1	1e-125	scaffold25_size399123	2e-09
I0YJE3_9CHLO	Zn-dependent exopeptidase	metallocarboxypeptidase A MCYG_01475 isoform X1	P:protein metabolic process; C:extracellular space; C:membrane; F:binding; F:hydrolase activity	EC:3.4.17	IPR000834 (SMART); G3DSA:3.40.630.10 (GENE3D); IPR000834 (PFAM); PTHR11705 (PANTHER); PTHR11705:SF81 (PANTHER); SSF53187 (SUPERFAMILY)	tr|A8JA31|A8JA31_CHLRE	Predicted protein	5e-114	tr|D8TMG6|D8TMG6_VOLCA	2e-117	scaffold2.g7071.t1	2e-73	scaffold2_size3998120	4e-08
I0YJE4_9CHLO	Uncharacterized protein (Fragment)	hypothetical protein COCSUDRAFT_9312, partial	C:intracellular		PTHR12416:SF3 (PANTHER); PTHR12416 (PANTHER)	tr|A8J773|A8J773_CHLRE	Predicted protein	6e-33	tr|D8UEP5|D8UEP5_VOLCA	1e-15	scaffold2.g7072.t1	6e-18	scaffold2_size3998120	6e-15
I0YJE5_9CHLO	Chromatin associated protein KTI12	KTI12 homolog	F:calmodulin binding; P:root meristem growth; P:leaf development; P:5-carbamoylmethyl uridine residue modification; C:Elongator holoenzyme complex; P:tRNA wobble uridine modification; P:meristem structural organization; P:tRNA modification; P:regulation of transcription from RNA polymerase II promoter		IPR013641 (PFAM); IPR027417 (G3DSA:3.40.50.GENE3D); PTHR12435 (PANTHER); PTHR12435:SF2 (PANTHER); IPR027417 (SUPERFAMILY)	tr|A8IR25|A8IR25_CHLRE	Predicted protein	2e-86	tr|D8UB72|D8UB72_VOLCA	3e-71	scaffold1.g5681.t1	7e-69	scaffold1_size3450625	2e-40
I0YJE6_9CHLO	Uncharacterized protein	basal body	P:centriole replication; P:centriole-centriole cohesion		no IPS match	tr|Q764P7|Q764P7_CHLRE	Basal body protein	4e-46	tr|D8TPR8|D8TPR8_VOLCA	2e-40	scaffold2.g7126.t1	2e-34
I0YJE7_9CHLO	Uncharacterized protein	E3 ubiquitin- ligase synoviolin	F:protein binding; C:cytoplasm; P:catabolic process; P:signal transduction; C:membrane; P:cellular protein modification process; C:endoplasmic reticulum; F:transferase activity; P:response to stress		IPR001841 (SMART); IPR013083 (G3DSA:3.30.40.GENE3D); IPR001841 (PFAM); IPR032832 (PTHR22763:PANTHER); PTHR22763 (PANTHER); IPR001841 (PROSITE_PROFILES); SSF57850 (SUPERFAMILY)	tr|A8JEP8|A8JEP8_CHLRE	Predicted protein (Fragment)	2e-153	tr|D8UDJ3|D8UDJ3_VOLCA	6e-158	scaffold14.g1286.t1	2e-153	scaffold14_size1568905	3e-21
I0YJE8_9CHLO	Signal recognition particle protein	signal recognition particle	F:nucleotide binding; F:RNA binding; P:cellular component organization; P:transport; C:plastid; F:hydrolase activity	EC:3.6.1; EC:3.6.1.15	IPR013822 (SMART); IPR000897 (SMART); IPR003593 (SMART); IPR004125 (G3DSA:1.10.260.GENE3D); IPR027417 (G3DSA:3.40.50.GENE3D); IPR013822 (PFAM); G3DSA:1.20.120.140 (GENE3D); IPR004780 (TIGRFAM); IPR004125 (PFAM); IPR000897 (PFAM); PTHR11564 (PANTHER); IPR004780 (PTHR11564:PANTHER); IPR022941 (HAMAP); IPR027417 (SUPERFAMILY); IPR004125 (SUPERFAMILY)	tr|A8J758|A8J758_CHLRE	Chloroplast SRP54 subunit of signal recognition particle	0	tr|D8UEN3|D8UEN3_VOLCA	2e-59	scaffold14.g1287.t1	0	scaffold39_size111754	8e-110
I0YJF0_9CHLO	SOUL-domain-containing protein	SOUL-domain-containing protein			IPR006917 (PFAM); IPR018790 (PFAM); PTHR11220:SF35 (PANTHER); IPR006917 (PANTHER); IPR032710 (SUPERFAMILY); IPR011256 (SUPERFAMILY)	tr|A8IN89|A8IN89_CHLRE	Predicted protein	2e-112	tr|D8TLU0|D8TLU0_VOLCA	1e-89	scaffold14.g1320.t1	5e-99	scaffold14_size1568905	3e-30
I0YJF4_9CHLO	LSU ribosomal protein L11P	50S ribosomal L11	F:RNA binding; F:structural molecule activity; C:ribosome; P:translation		IPR000911 (SMART); IPR020783 (G3DSA:1.10.10.GENE3D); IPR020783 (PFAM); IPR020784 (PFAM); IPR020784 (G3DSA:3.30.1550.GENE3D); IPR006519 (TIGRFAM); IPR000911 (PANTHER); PTHR11661:SF7 (PANTHER); PD001367 (PRODOM); IPR000911 (HAMAP); IPR020783 (SUPERFAMILY); IPR020784 (SUPERFAMILY)	tr|A8ICE4|A8ICE4_CHLRE	Plastid ribosomal protein L11	5e-68	tr|D8TYY1|D8TYY1_VOLCA	5e-72	scaffold17.g451.t1	2e-67	scaffold17_size836474	9e-16
I0YJF7_9CHLO	Uncharacterized protein (Fragment)	lys-63-specific deubiquitinase BRCC36- partial	F:protein binding		IPR000555 (SMART); G3DSA:3.40.140.10 (GENE3D); IPR000555 (PFAM); PTHR10410 (PANTHER); PTHR10410:SF2 (PANTHER); SSF102712 (SUPERFAMILY)	tr|A8JFQ4|A8JFQ4_CHLRE	Predicted protein	2e-64	tr|D8U8N7|D8U8N7_VOLCA	4e-49
I0YJG0_9CHLO	Tubulin alpha chain	alpha tubulin	F:nucleotide binding; C:cytoskeleton; C:cytoplasm; F:structural molecule activity; P:cellular process; F:hydrolase activity	EC:3.6.1; EC:3.6.1.15	IPR002452 (PRINTS); IPR000217 (PRINTS); IPR003008 (SMART); IPR018316 (SMART); IPR018316 (G3DSA:3.30.1330.GENE3D); IPR003008 (G3DSA:3.40.50.GENE3D); IPR018316 (PFAM); IPR003008 (PFAM); IPR023123 (G3DSA:1.10.287.GENE3D); IPR000217 (PANTHER); PTHR11588:SF101 (PANTHER); IPR003008 (SUPERFAMILY); IPR008280 (SUPERFAMILY)	tr|Q540H1|Q540H1_CHLRE	Alpha tubulin 1	0	tr|D8TXF3|D8TXF3_VOLCA	0	scaffold1.g5327.t1	0	scaffold1_size3450625	9e-81
I0YJG5_9CHLO	Uncharacterized protein (Fragment)	GTP cyclohydrolase II	F:hydrolase activity		IPR032677 (PFAM); PTHR21327:SF12 (PANTHER); PTHR21327 (PANTHER); IPR032677 (SUPERFAMILY)	tr|A8IZV5|A8IZV5_CHLRE	Bifunctional GTP cyclohydrolase II	1e-88	tr|D8TM23|D8TM23_VOLCA	1e-92	scaffold14.g1171.t1	6e-87	scaffold14_size1568905	2e-13
I0YJG7_9CHLO	U1 small nuclear ribonucleoprotein C	U1 small nuclear ribonucleo C	C:nucleus; F:RNA binding; P:cellular component organization; P:nucleobase-containing compound metabolic process		IPR003604 (SMART); IPR017340 (PIRSF); IPR013085 (PFAM); IPR017340 (PANTHER); PTHR31148:SF1 (PANTHER); IPR017340 (HAMAP); IPR000690 (PROSITE_PROFILES); SSF57667 (SUPERFAMILY)	tr|A8J1I2|A8J1I2_CHLRE	U1 small nuclear ribonucleoprotein C	3e-19	tr|D8TL31|D8TL31_VOLCA	2e-19	scaffold11.g4062.t1	2e-25	scaffold11_size1415723	5e-11
I0YJG8_9CHLO	Uncharacterized protein	phytol kinase-related	C:membrane; F:kinase activity		PTHR32523:SF7 (PANTHER); PTHR32523 (PANTHER)	tr|A8IZZ1|A8IZZ1_CHLRE	Phytol kinase-related protein	2e-78	tr|D8U991|D8U991_VOLCA	1e-76	scaffold14.g1173.t1	2e-80	scaffold3_size2545224	8e-25
I0YJG9_9CHLO	Aldo/keto reductase	aldo keto reductase	F:catalytic activity; P:nucleobase-containing compound metabolic process		IPR020471 (PRINTS); IPR023210 (G3DSA:3.20.20.GENE3D); IPR023210 (PFAM); IPR001395 (PANTHER); PTHR11732:SF146 (PANTHER); IPR023210 (SUPERFAMILY)	tr|A8IS90|A8IS90_CHLRE	Aldo/keto reductase	4e-148	tr|D8U350|D8U350_VOLCA	1e-131	scaffold13.g162.t1	2e-125	scaffold13_size1291228	5e-15
I0YJH1_9CHLO	Uncharacterized protein	hypothetical protein COCSUDRAFT_60209			IPR032801 (PFAM); IPR012336 (SUPERFAMILY)	tr|A8IQW5|A8IQW5_CHLRE	Predicted protein	6e-90	tr|D8TR67|D8TR67_VOLCA	3e-94	scaffold7.g3707.t1	2e-64	scaffold7_size1837125	1e-10
I0YJH3_9CHLO	Uncharacterized protein	rhomboid-like protease	P:protein metabolic process; C:membrane; P:biosynthetic process; P:nucleobase-containing compound metabolic process; F:hydrolase activity	EC:3.4.21	IPR003822 (G3DSA:1.20.1160.GENE3D); IPR022764 (PFAM); IPR022764 (G3DSA:1.20.1540.GENE3D); IPR002610 (PANTHER); SSF144091 (SUPERFAMILY); IPR003822 (SUPERFAMILY)	tr|A8J380|A8J380_CHLRE	Rhomboid-like protein	2e-18	tr|D8TVA4|D8TVA4_VOLCA	2e-16	scaffold5.g606.t1	9e-11	scaffold5_size2028652	1e-08
I0YJH4_9CHLO	Ras-domain-containing protein	ras-related Rab-21-like isoform X1	F:nucleotide binding; C:endosome; P:signal transduction; P:cellular component organization; C:vacuole; P:transport		PR00449 (PRINTS); SM00174 (SMART); SM00173 (SMART); SM00175 (SMART); SM00176 (SMART); IPR001806 (PFAM); IPR027417 (G3DSA:3.40.50.GENE3D); IPR005225 (TIGRFAM); PTHR24073 (PANTHER); PTHR24073:SF509 (PANTHER); PS51419 (PROSITE_PROFILES); IPR027417 (SUPERFAMILY)	tr|A8J6A0|A8J6A0_CHLRE	Small rab-related GTPase	1e-46	tr|D8TNV8|D8TNV8_VOLCA	6e-45	scaffold10.g2381.t1	6e-43	scaffold10_size1428175	1e-13
I0YJH5_9CHLO	Peroxisomal biogenesis factor 11	peroxisomal membrane 11A	C:peroxisome; C:membrane; P:cellular component organization		IPR008733 (PFAM); PTHR12652:SF10 (PANTHER); PTHR12652 (PANTHER)	tr|A8IYU9|A8IYU9_CHLRE	Predicted protein (Fragment)	2e-49	tr|D8UAR8|D8UAR8_VOLCA	4e-57	scaffold14.g1174.t1	2e-46	scaffold14_size1568905	4e-06
I0YJH6_9CHLO	ABC family transporter (Fe-S assembly/SufBCD system)	ABC transporter I family member chloroplastic	F:nucleotide binding; P:cellular component organization; C:plastid; F:transporter activity; F:hydrolase activity	EC:3.6.1; EC:3.6.1.3; EC:3.6.3.31; EC:3.6.1.15	IPR010230 (TIGRFAM); IPR003439 (PFAM); IPR027417 (G3DSA:3.40.50.GENE3D); PTHR24220 (PANTHER); PTHR24220:SF85 (PANTHER); IPR027417 (SUPERFAMILY)	tr|A8ITJ3|A8ITJ3_CHLRE	Iron-sulfur cluster assembly protein	3e-107	tr|D8TZE6|D8TZE6_VOLCA	4e-107	scaffold6.g2546.t1	2e-87	scaffold6_size1922994	2e-21
I0YJI0_9CHLO	Uncharacterized protein	TVP38 TMEM64 family	C:membrane		IPR032816 (PFAM); IPR015414 (PANTHER)	tr|A8HXB2|A8HXB2_CHLRE	Predicted protein (Fragment)	1e-31	tr|D8THZ0|D8THZ0_VOLCA	3e-39	scaffold14.g1185.t1	7e-51	scaffold16_size857609	3e-12
I0YJI3_9CHLO	MFS general substrate transporter (Fragment)	probable anion transporter chloroplastic	C:membrane; C:plastid; F:transporter activity		G3DSA:1.20.1250.20 (GENE3D); IPR011701 (PFAM); G3DSA:1.20.1250.20 (GENE3D); PTHR11662:SF243 (PANTHER); PTHR11662 (PANTHER); IPR020846 (PROSITE_PROFILES); IPR020846 (SUPERFAMILY)	tr|A8J006|A8J006_CHLRE	Permease of major facilitator superfamily	1e-149	tr|D8U9A7|D8U9A7_VOLCA	4e-149	scaffold6.g2760.t1	3e-100	scaffold5_size2028652	3e-15
I0YJI4_9CHLO	Clavaminate synthase-like protein (Fragment)	probable 2-oxoglutarate-dependent dioxygenase At3g49630	F:catalytic activity; P:metabolic process; F:binding		PR00682 (PRINTS); IPR005123 (PFAM); IPR027443 (G3DSA:2.60.120.GENE3D); IPR026992 (PFAM); PTHR10209:SF144 (PANTHER); PTHR10209 (PANTHER); IPR005123 (PROSITE_PROFILES); SSF51197 (SUPERFAMILY)	tr|A8I1T0|A8I1T0_CHLRE	Oxygenase-like protein	7e-32	tr|D8TU52|D8TU52_VOLCA	2e-45	scaffold1.g5736.t1	9e-27	scaffold1_size3450625	5e-13
I0YJI5_9CHLO	L domain-like protein	L domain	F:protein binding		IPR006553 (SMART); IPR032675 (G3DSA:3.80.10.GENE3D); IPR001611 (PFAM); PTHR24006 (PANTHER); IPR001810 (SUPERFAMILY); SSF52047 (SUPERFAMILY); IPR032675 (SUPERFAMILY)	tr|A8ING7|A8ING7_CHLRE	Predicted protein	9e-15	tr|D8UCF7|D8UCF7_VOLCA	2e-25	scaffold14.g1149.t1	9e-132	scaffold14_size1568905	2e-16
I0YJI6_9CHLO	Glutathione reductase	glutathione chloroplastic	F:nucleotide binding; P:cellular homeostasis; P:generation of precursor metabolites and energy; F:catalytic activity; C:plastid		PR00411 (PRINTS); PR00368 (PRINTS); PIRSF000350 (PIRSF); IPR004099 (G3DSA:3.30.390.GENE3D); IPR023753 (G3DSA:3.50.50.GENE3D); IPR004099 (PFAM); IPR023753 (PFAM); IPR023753 (G3DSA:3.50.50.GENE3D); PTHR22912:SF135 (PANTHER); PTHR22912 (PANTHER); IPR016156 (SUPERFAMILY); IPR023753 (SUPERFAMILY)	tr|A8HXA6|A8HXA6_CHLRE	Glutathione reductase	1e-159	tr|D8U8C2|D8U8C2_VOLCA	0	scaffold2.g7110.t1	0	scaffold2_size3998120	8e-16
I0YJJ0_9CHLO	HSP90-domain-containing protein	heat shock 90A	F:nucleotide binding; F:protein binding; P:cellular process; P:response to stress		IPR020575 (PRINTS); IPR001404 (PIRSF); IPR003594 (SMART); IPR003594 (PFAM); IPR001404 (PFAM); IPR003594 (G3DSA:3.30.565.GENE3D); IPR001404 (PANTHER); IPR001404 (HAMAP); IPR020568 (SUPERFAMILY); SSF110942 (SUPERFAMILY); IPR003594 (SUPERFAMILY)	tr|A8J1U1|A8J1U1_CHLRE	Heat shock protein 90A	0	tr|D8TLB0|D8TLB0_VOLCA	0	scaffold14.g1160.t1	0	scaffold14_size1568905	2e-22
I0YJJ2_9CHLO	50S ribosomal protein L31	RAN GTPase-activating 2-like	F:protein binding; F:structural molecule activity; C:ribosome; P:translation		IPR002150 (PRINTS); SM00368 (SMART); IPR001611 (PFAM); IPR025265 (PFAM); IPR002150 (TIGRFAM); IPR032675 (G3DSA:3.80.10.GENE3D); IPR002150 (PFAM); PTHR24106:SF115 (PANTHER); PTHR24106 (PANTHER); SSF52047 (SUPERFAMILY); SSF143800 (SUPERFAMILY)	tr|A8J750|A8J750_CHLRE	RAN GTPase activating protein, RANGAP1 (Fragment)	2e-73	tr|D8UEM6|D8UEM6_VOLCA	3e-99	scaffold14.g1191.t1	8e-104	scaffold14_size1568905	3e-19
I0YJJ3_9CHLO	Kinesin-like protein	125 kDa kinesin-related -like	F:nucleotide binding; C:cytoskeleton; F:protein binding; P:cellular process; F:motor activity	EC:3.6.1; EC:3.6.1.3; EC:3.6.1.15; EC:3.6.4.4	IPR001752 (PRINTS); IPR001752 (SMART); IPR001752 (PFAM); IPR001752 (G3DSA:3.40.850.GENE3D); IPR027640 (PANTHER); PTHR24115:SF105 (PANTHER); IPR001752 (PROSITE_PROFILES); IPR027417 (SUPERFAMILY)	tr|A8J3D2|A8J3D2_CHLRE	Kinesin-like protein (Fragment)	2e-179	tr|D8U2D1|D8U2D1_VOLCA	3e-158	scaffold14.g1275.t1	2e-150	scaffold14_size1568905	3e-44
I0YJJ4_9CHLO	Lem3/Cdc50	Lem3 Cdc50	C:membrane		IPR005045 (PIRSF); IPR005045 (PFAM); IPR005045 (PANTHER)	tr|A8J1W0|A8J1W0_CHLRE	Predicted protein	3e-69	tr|D8TIN0|D8TIN0_VOLCA	3e-71	scaffold14.g1274.t1	3e-89	scaffold14_size1568905	5e-17
I0YJJ5_9CHLO	Uncharacterized protein	ribosomal RNA large subunit methyltransferase N	C:cytoplasm; F:transferase activity; F:binding; P:nucleobase-containing compound metabolic process	EC:2.1.1	IPR004383 (PIRSF); IPR007197 (PFAM); IPR013785 (G3DSA:3.20.20.GENE3D); IPR004383 (TIGRFAM); PTHR30544:SF3 (PANTHER); IPR004383 (PANTHER); SSF102114 (SUPERFAMILY)	tr|A8I8N2|A8I8N2_CHLRE	Predicted Fe-S-cluster redox enzyme	2e-134	tr|D8UF95|D8UF95_VOLCA	5e-129	scaffold14.g1273.t1	1e-102	scaffold17_size836474	9e-11
I0YJJ6_9CHLO	Uncharacterized protein	beta-1,3-galactosyltransferase 15-like	C:cytoplasm; C:membrane; P:cellular protein modification process; C:Golgi apparatus; P:biosynthetic process; F:transferase activity	EC:2.4.1	IPR002659 (PFAM); IPR002659 (PANTHER)	tr|A8JH93|A8JH93_CHLRE	Glycosyl transferase, family 31 (Fragment)	3e-11	tr|D8TN57|D8TN57_VOLCA	6e-14	scaffold14.g1336.t1	5e-82	scaffold14_size1568905	3e-09
I0YJJ7_9CHLO	Uncharacterized protein	serrate RNA effector molecule	F:metal ion binding; C:plastid		IPR007042 (PFAM); IPR021933 (PFAM); PTHR13165 (PANTHER)	tr|A8HT66|A8HT66_CHLRE	Predicted protein	5e-59	tr|D8TSE5|D8TSE5_VOLCA	3e-69	scaffold14.g1351.t1	6e-28
I0YJJ9_9CHLO	Uncharacterized protein (Fragment)	hypothetical protein COCSUDRAFT_9085, partial	C:membrane		IPR021855 (PFAM); PTHR34575 (PANTHER)	tr|A8IHE9|A8IHE9_CHLRE	Predicted membrane protein	7e-24	tr|D8U3Y1|D8U3Y1_VOLCA	7e-25	scaffold7.g3442.t1	2e-21	scaffold7_size1837125	1e-07
I0YJK1_9CHLO	DNase I-like protein	DNase I	C:membrane		IPR005135 (G3DSA:3.60.10.GENE3D); PTHR12393 (PANTHER); IPR005135 (SUPERFAMILY)	tr|A8I048|A8I048_CHLRE	Predicted protein	7e-33	tr|D8U8M1|D8U8M1_VOLCA	1e-43
I0YJK3_9CHLO	VAMP-associated protein	vesicle-associated 1-2-like	C:cytoplasm; C:membrane; C:endoplasmic reticulum		IPR016763 (PIRSF); IPR000535 (PFAM); IPR008962 (G3DSA:2.60.40.GENE3D); IPR016763 (PANTHER); PTHR10809:SF6 (PANTHER); IPR000535 (PROSITE_PROFILES); IPR008962 (SUPERFAMILY)	tr|A8IWT7|A8IWT7_CHLRE	Predicted protein	6e-53	tr|D8UBR9|D8UBR9_VOLCA	5e-45	scaffold14.g1219.t1	1e-42	scaffold14_size1568905	3e-26
I0YJK5_9CHLO	SFT2-domain-containing protein	vesicle transport SFT2B	C:membrane; P:transport		IPR007305 (PFAM); IPR011691 (PANTHER)	tr|A8IYH0|A8IYH0_CHLRE	Tetraspanning membrane protein, SFT2-like protein	4e-22	tr|D8UCJ5|D8UCJ5_VOLCA	4e-21	scaffold14.g1241.t1	3e-38
I0YJK9_9CHLO	Uncharacterized protein	methyltransferase MT- (ISS)	F:transferase activity; P:nucleobase-containing compound metabolic process		IPR007757 (PFAM); IPR007757 (PROSITE_PROFILES)	tr|A8I014|A8I014_CHLRE	Predicted protein (Fragment)	3e-47	tr|D8UFC6|D8UFC6_VOLCA	5e-48	scaffold14.g1347.t1	2e-74	scaffold14_size1568905	4e-23
I0YJL4_9CHLO	DUF221-domain-containing protein	ERD4-related membrane	C:membrane		IPR003864 (PFAM); IPR032880 (PFAM); IPR027815 (PFAM); PTHR13018 (PANTHER)	tr|A8JGH0|A8JGH0_CHLRE	ERD4-related membrane protein	3e-98	tr|D8U8Q2|D8U8Q2_VOLCA	8e-89	scaffold2.g7014.t1	1e-74	scaffold14_size1568905	1e-17
I0YJL5_9CHLO	Uncharacterized protein (Fragment)	hypothetical protein COCSUDRAFT_9732, partial			IPR012663 (TIGRFAM); IPR012663 (PFAM)	tr|A8HWB1|A8HWB1_CHLRE	Predicted protein (Fragment)	3e-16	tr|D8TIU5|D8TIU5_VOLCA	1e-12
I0YJL6_9CHLO	Uncharacterized protein	ubiquitin-conjugating enzyme E2 T	F:nucleotide binding; C:nucleus; F:protein binding; C:cytoplasm; P:cellular protein modification process; F:chromatin binding; F:transferase activity; P:DNA metabolic process; P:response to stress		SM00212 (SMART); IPR016135 (G3DSA:3.10.110.GENE3D); IPR000608 (PFAM); PTHR24067 (PANTHER); PTHR24067:SF59 (PANTHER); IPR000608 (PROSITE_PROFILES); IPR016135 (SUPERFAMILY)	tr|A8HSC2|A8HSC2_CHLRE	Predicted protein (Fragment)	3e-42	tr|D8TRH9|D8TRH9_VOLCA	7e-37	scaffold2.g7099.t1	2e-40	scaffold2_size3998120	4e-14
I0YJM2_9CHLO	Histone acetyltransferase	acetyltransferase NSI	P:biosynthetic process; F:transferase activity; C:plastid; P:cellular process	EC:2.3.1	IPR016181 (G3DSA:3.40.630.GENE3D); IPR000182 (PFAM); PTHR23091:SF206 (PANTHER); PTHR23091 (PANTHER); IPR000182 (PROSITE_PROFILES); IPR016181 (SUPERFAMILY)	tr|A8JD62|A8JD62_CHLRE	Histone acetyltransferase (Fragment)	5e-59	tr|D8U5A2|D8U5A2_VOLCA	2e-54	scaffold8.g1673.t1	8e-56	scaffold8_size1730130	1e-15
I0YJM3_9CHLO	Ribosomal protein L14	50S ribosomal L14	F:structural molecule activity; C:ribosome; P:translation		IPR000218 (SMART); IPR005745 (TIGRFAM); IPR000218 (G3DSA:2.40.150.GENE3D); IPR000218 (PFAM); PTHR11761:SF3 (PANTHER); IPR000218 (PANTHER); IPR000218 (HAMAP); IPR000218 (SUPERFAMILY)	sp|P11094|RK14_CHLRE	50S ribosomal protein L14, chloroplastic	3e-24	tr|D0VMV8|D0VMV8_VOLCA	6e-24	scaffold2.g7084.t1	1e-37	scaffold41_size205970	2e-17
I0YJM5_9CHLO	Uncharacterized protein	vacuolar-sorting receptor 3-like	C:endosome; F:protein binding; C:membrane; C:Golgi apparatus; P:transport		IPR001881 (SMART); IPR000742 (SMART); G3DSA:3.50.30.30 (GENE3D); G3DSA:2.10.25.10 (GENE3D); G3DSA:2.10.25.10 (GENE3D); IPR003137 (PFAM); IPR001881 (PFAM); G3DSA:2.10.25.10 (GENE3D); G3DSA:2.10.25.10 (GENE3D); IPR026823 (PFAM); PTHR22765:SF56 (PANTHER); PTHR22765 (PANTHER); IPR000742 (PROSITE_PROFILES); SSF52025 (SUPERFAMILY); SSF57196 (SUPERFAMILY); IPR009030 (SUPERFAMILY)	tr|A8JEJ5|A8JEJ5_CHLRE	Vacuolar sorting receptor	1e-65	tr|D8UDS3|D8UDS3_VOLCA	3e-48	scaffold14.g1336.t1	4e-81	scaffold14_size1568905	1e-25
I0YJM6_9CHLO	Six-hairpin glycosidase	Six-hairpin glycosidase	P:carbohydrate metabolic process; C:membrane; F:hydrolase activity		IPR001701 (PFAM); IPR029044 (G3DSA:3.90.550.GENE3D); IPR012341 (G3DSA:1.50.10.GENE3D); PF13641 (PFAM); PTHR22298:SF39 (PANTHER); PTHR22298 (PANTHER); IPR008928 (SUPERFAMILY); IPR029044 (SUPERFAMILY)	tr|A8HW25|A8HW25_CHLRE	Predicted protein	1e-37	tr|D8UIZ8|D8UIZ8_VOLCA	8e-29	scaffold20.g7637.t1	2e-149	scaffold20_size1437327	4e-20
I0YJM8_9CHLO	DNA repair protein rada	DNA repair	F:nucleotide binding; F:DNA binding; P:DNA metabolic process; P:response to stress; F:hydrolase activity	EC:3.6.1; EC:3.6.1.3; EC:3.6.1.15	PR01874 (PRINTS); IPR003593 (SMART); IPR027417 (G3DSA:3.40.50.GENE3D); IPR014721 (G3DSA:3.30.230.GENE3D); PF13541 (PFAM); PF13481 (PFAM); IPR004504 (TIGRFAM); PTHR32472:SF10 (PANTHER); PTHR32472 (PANTHER); IPR004504 (HAMAP); IPR020588 (PROSITE_PROFILES); IPR020568 (SUPERFAMILY); IPR027417 (SUPERFAMILY)	tr|A8I6M1|A8I6M1_CHLRE	Predicted protein	3e-26	tr|D8UAU2|D8UAU2_VOLCA	8e-36	scaffold14.g1326.t1	1e-96	scaffold14_size1568905	1e-31
I0YJN0_9CHLO	P-loop containing nucleoside triphosphate hydrolase protein	cell division control 6 homolog isoform X2	F:hydrolase activity		IPR015163 (SMART); PF13191 (PFAM); IPR011991 (G3DSA:1.10.10.GENE3D); G3DSA:1.10.8.60 (GENE3D); IPR015163 (PFAM); IPR027417 (G3DSA:3.40.50.GENE3D); PTHR10763 (PANTHER); PTHR10763:SF26 (PANTHER); IPR027417 (SUPERFAMILY); IPR011991 (SUPERFAMILY)	tr|A8JFM6|A8JFM6_CHLRE	Pre-initiation complex, subunit CDC6 (Fragment)	3e-22	tr|D8TYM7|D8TYM7_VOLCA	4e-20	scaffold2.g7089.t1	3e-53
I0YJN1_9CHLO	Phosphoribosyl pyrophosphate synthase isozyme 4	ribose-phosphate pyrophosphokinase	C:cytosol; P:biosynthetic process; F:binding; F:kinase activity; P:nucleobase-containing compound metabolic process; C:plasma membrane	EC:2.7.6.1	SM01400 (SMART); IPR029057 (G3DSA:3.40.50.GENE3D); IPR000836 (PFAM); IPR029057 (G3DSA:3.40.50.GENE3D); IPR005946 (TIGRFAM); IPR029099 (PFAM); PTHR10210 (PANTHER); PTHR10210:SF45 (PANTHER); IPR029057 (SUPERFAMILY); IPR029057 (SUPERFAMILY)	tr|A8IZW6|A8IZW6_CHLRE	Ribose-phosphate pyrophosphokinase	9e-172	tr|D8U973|D8U973_VOLCA	1e-168	scaffold14.g1310.t1	9e-138	scaffold14_size1568905	1e-15
I0YJN2_9CHLO	ATP-dependent DNA helicase	ATP-dependent DNA helicase Q-like 5 isoform X1	F:nucleic acid binding; F:nucleotide binding; P:DNA metabolic process; C:intracellular; F:hydrolase activity	EC:3.6.1; EC:3.6.1.3; EC:3.6.1.15	IPR001878 (SMART); IPR001650 (SMART); IPR014001 (SMART); IPR003034 (SMART); IPR001878 (G3DSA:4.10.60.GENE3D); IPR003034 (PFAM); IPR003034 (G3DSA:1.10.720.GENE3D); IPR004589 (TIGRFAM); IPR027417 (G3DSA:3.40.50.GENE3D); IPR027417 (G3DSA:3.40.50.GENE3D); IPR001650 (PFAM); IPR001878 (PFAM); IPR011545 (PFAM); PTHR13710:SF76 (PANTHER); PTHR13710 (PANTHER); IPR001650 (PROSITE_PROFILES); IPR001878 (PROSI…	tr|A8IJE8|A8IJE8_CHLRE	Predicted protein (Fragment)	3e-49	tr|D8UEP9|D8UEP9_VOLCA	1e-101	scaffold9.g3267.t1	7e-48	scaffold18_size793176	4e-37
I0YJN3_9CHLO	Glycoside hydrolase	glycoside hydrolase	P:carbohydrate metabolic process; F:hydrolase activity		IPR001547 (PFAM); IPR003609 (PFAM); IPR013781 (G3DSA:3.20.20.GENE3D); PTHR31451 (PANTHER); PS51257 (PROSITE_PROFILES); IPR017853 (SUPERFAMILY)	tr|A8JDR6|A8JDR6_CHLRE	Predicted protein (Fragment)	2e-34	tr|D8TQE7|D8TQE7_VOLCA	8e-35	scaffold3.g6510.t1	2e-63	scaffold5_size2028652	1e-17
I0YJN4_9CHLO	Uncharacterized protein (Fragment)	calcium uptake mitochondrial-like	F:binding		IPR002048 (SMART); IPR011992 (G3DSA:1.10.238.GENE3D); IPR011992 (G3DSA:1.10.238.GENE3D); IPR002048 (PFAM); IPR011992 (G3DSA:1.10.238.GENE3D); IPR002048 (PFAM); IPR011992 (G3DSA:1.10.238.GENE3D); PTHR12294 (PANTHER); PTHR12294:SF11 (PANTHER); IPR002048 (PROSITE_PROFILES); IPR011992 (SUPERFAMILY); IPR011992 (SUPERFAMILY); IPR011992 (SUPERFAMILY)	tr|A8JGI1|A8JGI1_CHLRE	Predicted protein	1e-65	tr|D8TNP3|D8TNP3_VOLCA	3e-59	scaffold12.g7991.t1	6e-45
I0YJN5_9CHLO	Thioredoxin dependent peroxidase	peroxiredoxin chloroplastic-like	P:cellular homeostasis; F:catalytic activity; P:metabolic process; P:response to stress	EC:1.11.1.7	IPR024706 (PIRSF); IPR000866 (PFAM); IPR012336 (G3DSA:3.40.30.GENE3D); PTHR10681 (PANTHER); IPR013766 (PROSITE_PROFILES); IPR012336 (SUPERFAMILY)	tr|A8ICK6|A8ICK6_CHLRE	Thioredoxin dependent peroxidase	2e-63	tr|D8U840|D8U840_VOLCA	1e-59
I0YJN8_9CHLO	Phosphoglycerate mutase-like protein	phosphoglycerate mutase	F:catalytic activity; P:metabolic process		IPR013078 (SMART); IPR029033 (G3DSA:3.40.50.GENE3D); IPR013078 (PFAM); PTHR16469 (PANTHER); IPR029033 (SUPERFAMILY)	tr|A8IFD6|A8IFD6_CHLRE	Predicted protein	2e-22	tr|D8TZ34|D8TZ34_VOLCA	1e-33
I0YJN9_9CHLO	Snf7-domain-containing protein	Vacuolar sorting-associated 24 1	C:nucleus; C:endosome; F:protein binding; C:membrane; P:cellular component organization; C:cytosol; C:vacuole; P:transport		IPR005024 (PFAM); PTHR10476:SF1 (PANTHER); PTHR10476 (PANTHER)	tr|A8I7J0|A8I7J0_CHLRE	Subunit of the ESCRT-III complex	3e-54	tr|D8U8U3|D8U8U3_VOLCA	7e-55	scaffold20.g7626.t1	1e-33
I0YJP0_9CHLO	Uncharacterized protein	hypothetical protein COCSUDRAFT_60270			IPR013536 (PFAM); PTHR23153:SF36 (PANTHER); PTHR23153 (PANTHER); IPR013536 (PROSITE_PROFILES)	tr|A8IS73|A8IS73_CHLRE	Predicted protein	4e-32	tr|D8TSY8|D8TSY8_VOLCA	8e-39	scaffold2.g7061.t1	2e-43	scaffold2_size3998120	2e-23
I0YJP6_9CHLO	Uncharacterized protein	L domain	F:ATP binding; P:self proteolysis; C:membrane; C:integral component of membrane; F:protein kinase activity; P:phosphorylation; P:protein phosphorylation; F:kinase activity		IPR032675 (G3DSA:3.80.10.GENE3D); IPR032675 (G3DSA:3.80.10.GENE3D); PTHR27000 (PANTHER); IPR032675 (SUPERFAMILY)	tr|A8J370|A8J370_CHLRE	Predicted protein	9e-34	tr|D8U7M1|D8U7M1_VOLCA	2e-26	scaffold18.g1951.t1	2e-28	scaffold16_size857609	1e-11
I0YJP7_9CHLO	DEAD-domain-containing protein	DEAD DEAH box helicase domain containing	F:nucleic acid binding; F:nucleotide binding; P:metabolic process; P:cellular process; F:hydrolase activity	EC:3.6.1; EC:3.6.1.15	IPR014001 (SMART); IPR001650 (SMART); IPR001650 (PFAM); IPR027417 (G3DSA:3.40.50.GENE3D); IPR011545 (PFAM); IPR027417 (G3DSA:3.40.50.GENE3D); PTHR24031 (PANTHER); PTHR24031:SF232 (PANTHER); IPR014014 (PROSITE_PROFILES); IPR014001 (PROSITE_PROFILES); IPR001650 (PROSITE_PROFILES); IPR027417 (SUPERFAMILY)	tr|A8J8R3|A8J8R3_CHLRE	Predicted protein (Fragment)	2e-129	tr|D8TWH6|D8TWH6_VOLCA	2e-120	scaffold14.g1294.t1	4e-115	scaffold37_size123908	1e-43
I0YJP8_9CHLO	DNA/RNA polymerase (Fragment)	DNA RNA partial	P:DNA metabolic process; P:response to stress		IPR001126 (PFAM); G3DSA:3.30.70.270 (GENE3D); PTHR11076:SF10 (PANTHER); PTHR11076 (PANTHER); IPR001126 (PROSITE_PROFILES); SSF56672 (SUPERFAMILY)	tr|A8J2U4|A8J2U4_CHLRE	Predicted protein (Fragment)	1e-62	tr|D8TV00|D8TV00_VOLCA	5e-62	scaffold13.g328.t1	4e-49	scaffold13_size1291228	4e-14
I0YJP9_9CHLO	DUF947-domain-containing protein	ribosomal RNA processing 36 homolog	C:nucleolus; P:nucleobase-containing compound metabolic process		IPR009292 (PFAM); IPR009292 (PANTHER); PTHR21738:SF0 (PANTHER)	tr|A8J7X4|A8J7X4_CHLRE	Predicted protein (Fragment)	2e-42	tr|D8ULV6|D8ULV6_VOLCA	5e-11	scaffold8.g1520.t1	9e-66	scaffold8_size1730130	4e-16
I0YJQ0_9CHLO	Uncharacterized protein	Surfeit locus 6			IPR029188 (PFAM); IPR029190 (PFAM); IPR007019 (PANTHER); PTHR14369:SF0 (PANTHER)	tr|A8I829|A8I829_CHLRE	Predicted protein	8e-29	tr|D8U4M4|D8U4M4_VOLCA	6e-51	scaffold1.g5180.t1	2e-23
I0YJQ2_9CHLO	P-loop containing nucleoside triphosphate hydrolase protein	GTP-binding At2g22870	F:nucleotide binding; P:cellular component organization; P:cell cycle; F:hydrolase activity		IPR006073 (PFAM); IPR027417 (G3DSA:3.40.50.GENE3D); IPR019987 (TIGRFAM); PTHR11649:SF49 (PANTHER); PTHR11649 (PANTHER); IPR019987 (HAMAP); IPR030393 (PROSITE_PROFILES); IPR027417 (SUPERFAMILY)	tr|A8J625|A8J625_CHLRE	Predicted protein (Fragment)	7e-75	tr|D8UHG4|D8UHG4_VOLCA	1e-80	scaffold1.g5181.t1	3e-84	scaffold1_size3450625	4e-22
I0YJQ3_9CHLO	Flagellar associated protein	flagellar associated	C:cell		IPR021610 (PFAM); PTHR38666 (PANTHER); PTHR38666:SF2 (PANTHER)	tr|A8ISN1|A8ISN1_CHLRE	Flagellar associated protein	1e-104	tr|D8UFU0|D8UFU0_VOLCA	1e-103	scaffold1.g5459.t1	5e-34	scaffold1_size3450625	1e-28
I0YJQ4_9CHLO	LETM1-domain-containing protein	LETM1 and EF-hand domain-containing mitochondrial	C:mitochondrion; C:membrane; F:binding		IPR011992 (G3DSA:1.10.238.GENE3D); IPR011685 (PFAM); PTHR14009:SF1 (PANTHER); PTHR14009 (PANTHER); IPR033122 (PROSITE_PROFILES); IPR002048 (PROSITE_PROFILES); IPR011992 (SUPERFAMILY)	tr|A8JEE6|A8JEE6_CHLRE	Predicted protein	4e-79	tr|D8UA96|D8UA96_VOLCA	8e-109	scaffold1.g5186.t1	7e-134	scaffold1_size3450625	4e-11
I0YJQ5_9CHLO	DUF185-domain-containing protein	NADH dehydrogenase [ubiquinone] complex assembly factor 7-like			IPR003788 (PFAM); IPR003788 (PANTHER); PTHR12049:SF7 (PANTHER); IPR029063 (SUPERFAMILY)	tr|A8I2D0|A8I2D0_CHLRE	Predicted protein (Fragment)	4e-52	tr|D8UIJ4|D8UIJ4_VOLCA	2e-94	scaffold1.g5187.t1	1e-124	scaffold1_size3450625	2e-35
I0YJQ6_9CHLO	Glutamyl-tRNA(Gln) amidotransferase subunit A, chloroplastic/mitochondrial	glutamyl-tRNA(Gln) amidotransferase subunit chloroplastic mitochondrial	F:nucleotide binding; C:mitochondrion; P:cellular component organization; F:transferase activity; P:nucleobase-containing compound metabolic process; C:plastid; P:translation	EC:6.3.5.7	IPR023631 (PFAM); IPR023631 (G3DSA:3.90.1300.GENE3D); IPR004412 (TIGRFAM); IPR000120 (PANTHER); PTHR11895:SF101 (PANTHER); IPR004412 (HAMAP); IPR023631 (SUPERFAMILY)	tr|A8IIN4|A8IIN4_CHLRE	Glutamyl-tRNA(Gln) amidotransferase subunit A, chloroplastic/mitochondrial	0	tr|D8TJB6|D8TJB6_VOLCA	2e-147	scaffold13.g286.t1	0	scaffold13_size1291228	9e-98
I0YJQ7_9CHLO	Uncharacterized protein	adp-ribose pyrophosphatase	C:membrane; F:hydrolase activity		IPR015797 (G3DSA:3.90.79.GENE3D); IPR000086 (PFAM); PTHR11839:SF11 (PANTHER); PTHR11839 (PANTHER); IPR000086 (PROSITE_PROFILES); IPR015797 (SUPERFAMILY)	tr|A8J8J3|A8J8J3_CHLRE	Predicted protein (Fragment)	3e-17	tr|D8U7A9|D8U7A9_VOLCA	6e-22	scaffold1.g5184.t1	9e-35	scaffold1_size3450625	1e-07
I0YJR3_9CHLO	DEHYDROASCORBATE reductase	DEHYDROASCORBATE reductase	F:protein binding; F:catalytic activity		IPR010987 (G3DSA:1.20.1050.GENE3D); IPR004045 (PFAM); IPR012336 (G3DSA:3.40.30.GENE3D); PTHR11260:SF128 (PANTHER); PTHR11260 (PANTHER); IPR010987 (SUPERFAMILY); IPR012336 (SUPERFAMILY)	tr|A8I0K9|A8I0K9_CHLRE	Dehydroascorbate reductase	2e-39	tr|D8TYM3|D8TYM3_VOLCA	1e-37	scaffold5.g793.t1	1e-39	scaffold32_size168507	5e-08
I0YJR4_9CHLO	Clavaminate synthase-like protein	taurine catabolism dioxygenase	F:catalytic activity; P:metabolic process		IPR003819 (PFAM); PTHR39290:SF2 (PANTHER); PTHR39290 (PANTHER); SSF51197 (SUPERFAMILY)	tr|A8HS86|A8HS86_CHLRE	Predicted protein	3e-33	tr|D8TV08|D8TV08_VOLCA	1e-42	scaffold7.g3510.t1	1e-27
I0YJR6_9CHLO	Uncharacterized protein	Seleno H			PTHR33638 (PANTHER); PTHR33638:SF1 (PANTHER)	tr|A8JGP7|A8JGP7_CHLRE	Selenoprotein H OS=Chlamydomonas reinhardtii GN=SelH PE=4 SV=2	2e-24	tr|D8UAF8|D8UAF8_VOLCA	2e-26
I0YJS5_9CHLO	Cytochrome P450	cytochrome P450	F:catalytic activity; P:metabolic process; F:binding		IPR002403 (PRINTS); IPR001128 (G3DSA:1.10.630.GENE3D); IPR001128 (PFAM); PTHR24286 (PANTHER); IPR001128 (SUPERFAMILY)	tr|A5YU13|A5YU13_CHLRE	CYP97C3	1e-16	tr|D8UA28|D8UA28_VOLCA	7e-14	scaffold84.g4562.t1	1e-12
I0YJS6_9CHLO	Uncharacterized protein	urea-proton symporter DUR3	C:membrane; F:transporter activity		IPR001734 (PFAM); IPR001734 (PANTHER); IPR031155 (PTHR11819:PANTHER); IPR001734 (PROSITE_PROFILES)	tr|A8JGG7|A8JGG7_CHLRE	Urea active transporter, isoform B	1e-148	tr|D8UF50|D8UF50_VOLCA	4e-145
I0YJS7_9CHLO	Lipoxygenase	lipoxygenase chloroplastic	F:protein binding; F:catalytic activity; P:metabolic process	EC:1.13.11	IPR001246 (PRINTS); IPR013819 (PRINTS); G3DSA:1.20.245.10 (GENE3D); IPR013819 (PFAM); G3DSA:3.10.450.60 (GENE3D); IPR027433 (G3DSA:4.10.372.GENE3D); G3DSA:4.10.375.10 (GENE3D); IPR001024 (G3DSA:2.60.60.GENE3D); IPR000907 (PANTHER); IPR013819 (PROSITE_PROFILES); IPR013819 (SUPERFAMILY)	tr|A8IKX4|A8IKX4_CHLRE	Lipoxygenase	2e-93	tr|D8UD18|D8UD18_VOLCA	7e-109
I0YJS8_9CHLO	Uncharacterized protein	trafficking particle complex subunit 11	C:membrane		IPR021773 (PFAM); PTHR14374 (PANTHER)	tr|A8J6X2|A8J6X2_CHLRE	Predicted protein (Fragment)	2e-23	tr|D8TT61|D8TT61_VOLCA	2e-32	scaffold1.g5191.t1	2e-69
I0YJT0_9CHLO	D-amino acid oxidase (Fragment)	oxidoreductase TDA3	F:catalytic activity; P:metabolic process		IPR006076 (PFAM); IPR023753 (G3DSA:3.50.50.GENE3D); PTHR13847 (PANTHER); PTHR13847:SF150 (PANTHER); IPR023753 (SUPERFAMILY)	tr|A8ISJ7|A8ISJ7_CHLRE	FAD-dependent oxidoreductase	4e-101	tr|D8UFJ0|D8UFJ0_VOLCA	8e-77	scaffold6.g2650.t1	3e-59	scaffold6_size1922994	3e-18
I0YJT9_9CHLO	Thiamin diphosphate-binding protein	2-oxoisovalerate dehydrogenase subunit beta mitochondrial	F:catalytic activity; P:metabolic process		IPR005475 (SMART); IPR009014 (G3DSA:3.40.50.GENE3D); IPR033248 (PFAM); IPR005475 (PFAM); IPR029061 (G3DSA:3.40.50.GENE3D); PTHR11624:SF21 (PANTHER); IPR033247 (PANTHER); IPR029061 (SUPERFAMILY); IPR009014 (SUPERFAMILY)	tr|A8JBC7|A8JBC7_CHLRE	Pyruvate dehydrogenase E1 beta subunit	6e-64	tr|D8TKH8|D8TKH8_VOLCA	7e-179	scaffold1.g5190.t1	2e-136	scaffold1_size3450625	2e-37
I0YJU2_9CHLO	Ribosomal protein S26 component of cytosolic 80S ribosome and 40S small subunit (Fragment)	40S ribosomal S26	F:structural molecule activity; C:ribosome; P:translation		IPR000892 (PFAM); IPR000892 (PANTHER)	tr|A8IS22|A8IS22_CHLRE	Ribosomal protein S26 (Fragment)	4e-42	tr|D8TT06|D8TT06_VOLCA	3e-48	scaffold7.g3748.t1	5e-52	scaffold7_size1837125	6e-08
I0YJU3_9CHLO	Uncharacterized protein	THO complex subunit 5B			IPR019163 (PFAM); PTHR13375:SF3 (PANTHER); PTHR13375 (PANTHER)	tr|A8IRD9|A8IRD9_CHLRE	Predicted protein	8e-48	tr|D8TTE5|D8TTE5_VOLCA	4e-54	scaffold1.g5185.t1	3e-33	scaffold1_size3450625	1e-14
I0YJU5_9CHLO	Cryptochrome/photolyase FAD-binding domain-containing protein	deoxyribodipyrimidine photo-lyase-like	F:catalytic activity		IPR006050 (PFAM); G3DSA:1.10.579.10 (GENE3D); IPR005101 (PFAM); IPR014729 (G3DSA:3.40.50.GENE3D); G3DSA:1.25.40.80 (GENE3D); PTHR11455 (PANTHER); PTHR11455:SF18 (PANTHER); IPR006050 (PROSITE_PROFILES); IPR005101 (SUPERFAMILY); IPR006050 (SUPERFAMILY)	tr|A8JFI1|A8JFI1_CHLRE	Cryptochrome photoreceptor	1e-51	tr|D8UF46|D8UF46_VOLCA	2e-46	scaffold1.g5593.t1	6e-46	scaffold31_size197302	5e-27
I0YJU6_9CHLO	Imidazoleglycerol-phosphate dehydratase	imidazoleglycerol-phosphate dehydratase	F:catalytic activity; P:biosynthetic process; P:cellular process	EC:4.2.1.19	IPR000807 (PFAM); G3DSA:3.30.230.40 (GENE3D); G3DSA:3.30.230.40 (GENE3D); PTHR23133:SF4 (PANTHER); PTHR23133 (PANTHER); IPR000807 (HAMAP); IPR020568 (SUPERFAMILY); IPR020568 (SUPERFAMILY)	tr|A8I4F6|A8I4F6_CHLRE	Imidazoleglycerol-phosphate dehydratase	1e-115	tr|D8U378|D8U378_VOLCA	9e-117	scaffold1.g5314.t1	2e-117	scaffold32_size168507	2e-52
I0YJU7_9CHLO	Cytochrome b5	cytochrome b5	C:cell; F:catalytic activity; C:membrane; P:metabolic process; F:binding	EC:1.7.1.1; EC:1.7.99.4	IPR001199 (PRINTS); IPR001199 (SMART); IPR001199 (G3DSA:3.10.120.GENE3D); IPR001199 (PFAM); PTHR19359 (PANTHER); IPR001199 (PROSITE_PROFILES); IPR001199 (SUPERFAMILY)	tr|A8J8L3|A8J8L3_CHLRE	Cytochrome b5 protein	4e-42	tr|D8U7A2|D8U7A2_VOLCA	2e-38	scaffold18.g2023.t1	3e-26	scaffold18_size793176	2e-10
I0YJU8_9CHLO	Uncharacterized protein	RETICULATA-RELATED chloroplastic-like	C:membrane; C:integral component of membrane; C:plastid		IPR021825 (PFAM); PTHR31620 (PANTHER)	tr|A8IDT3|A8IDT3_CHLRE	Putative uncharacterized protein	2e-25	tr|D8TKM1|D8TKM1_VOLCA	2e-27	scaffold11.g3879.t1	1e-31	scaffold11_size1415723	2e-08
I0YJV2_9CHLO	IBR-domain-containing protein	probable E3 ubiquitin- ligase ARI8	F:protein binding; C:membrane; P:cellular protein modification process; F:transferase activity; C:intracellular		IPR002867 (SMART); IPR013083 (G3DSA:3.30.40.GENE3D); IPR018957 (PFAM); IPR002867 (PFAM); IPR031127 (PANTHER); PTHR11685:SF154 (PANTHER); IPR001841 (PROSITE_PROFILES); SSF57850 (SUPERFAMILY); SSF57850 (SUPERFAMILY); SSF57850 (SUPERFAMILY)	tr|A8IS24|A8IS24_CHLRE	Predicted protein	5e-175	tr|D8TT05|D8TT05_VOLCA	1e-179	scaffold1.g5298.t1	6e-46	scaffold1_size3450625	1e-15
I0YJV5_9CHLO	Protein DETOXIFICATION (Fragment)	MATE efflux family	C:membrane; F:transporter activity		IPR002528 (TIGRFAM); IPR002528 (PFAM); PTHR11206 (PANTHER)	tr|A8IHW0|A8IHW0_CHLRE	Protein DETOXIFICATION (Fragment)	1e-81	tr|D8TT68|D8TT68_VOLCA	4e-85	scaffold10.g2392.t1	1e-66	scaffold1_size3450625	6e-12
I0YJV7_9CHLO	Uncharacterized protein	methyltransferase 13	P:metabolic process; F:methyltransferase activity; F:transferase activity; P:methylation		IPR029063 (G3DSA:3.40.50.GENE3D); IPR029063 (G3DSA:3.40.50.GENE3D); PTHR12176 (PANTHER); PTHR12176:SF18 (PANTHER); IPR029063 (SUPERFAMILY); IPR029063 (SUPERFAMILY)	tr|A8IN22|A8IN22_CHLRE	SAM-dependent methyltransferase	6e-13	tr|D8UDC5|D8UDC5_VOLCA	6e-13
I0YJV8_9CHLO	Uncharacterized protein	ribosome biogenesis RLP24	F:structural molecule activity; P:cellular component organization; C:cytosol; C:nucleolus; C:ribosome; P:translation		IPR011017 (SMART); IPR000988 (G3DSA:2.30.170.GENE3D); IPR000988 (PFAM); IPR000988 (PANTHER); IPR024546 (PTHR10792:PANTHER); SSF57716 (SUPERFAMILY)	tr|A8JH29|A8JH29_CHLRE	Predicted protein	3e-72	tr|D8U8W3|D8U8W3_VOLCA	2e-75	scaffold1.g5386.t1	7e-51	scaffold1_size3450625	2e-36
I0YJV9_9CHLO	RecF/RecN/SMC protein	structural maintenance of chromosomes 3 isoform X1	F:nucleotide binding; F:protein binding; P:cellular component organization; F:chromatin binding; P:DNA metabolic process; C:intracellular; P:response to stress; P:cell cycle		IPR010935 (SMART); IPR003395 (PFAM); IPR010935 (PFAM); IPR027417 (G3DSA:3.40.50.GENE3D); PTHR18937 (PANTHER); IPR029685 (PTHR18937:PANTHER); IPR027417 (SUPERFAMILY); IPR027417 (SUPERFAMILY); IPR010935 (SUPERFAMILY)	tr|A8HZ26|A8HZ26_CHLRE	Structural maintenance of chromosomes protein 3 (Fragment)	0	tr|D8U213|D8U213_VOLCA	0	scaffold1.g5387.t1	7e-145	scaffold1_size3450625	4e-23
I0YJW2_9CHLO	Aquaporin-like protein	aquaporin isoform X1	C:membrane; F:transporter activity		IPR000425 (PRINTS); IPR023271 (G3DSA:1.20.1080.GENE3D); IPR000425 (PFAM); IPR000425 (PANTHER); PTHR19139:SF103 (PANTHER); IPR023271 (SUPERFAMILY)	tr|Q5VLJ9|Q5VLJ9_CHLRE	Aquaporin, glycerol transport activity	5e-13	tr|D8UCI9|D8UCI9_VOLCA	4e-12	scaffold20.g7877.t1	6e-20
I0YJW4_9CHLO	Ribosomal protein S5 domain 2-like protein	glucuronokinase 1	F:nucleotide binding; C:ribosome; F:kinase activity		IPR006206 (PRINTS); IPR014721 (G3DSA:3.30.230.GENE3D); IPR013750 (G3DSA:3.30.70.GENE3D); IPR006204 (PFAM); IPR013750 (PFAM); IPR006206 (PANTHER); PTHR10457:SF13 (PANTHER); IPR020568 (SUPERFAMILY); IPR013750 (SUPERFAMILY)	tr|A8I3U5|A8I3U5_CHLRE	Predicted protein	1e-99	tr|D8U1K6|D8U1K6_VOLCA	3e-65	scaffold1.g5428.t1	8e-101	scaffold1_size3450625	1e-22
I0YJW6_9CHLO	Carbamoyl-phosphate synthase S chain	carbamoyl-phosphate synthase small chloroplastic-like	F:catalytic activity; P:biosynthetic process; P:nucleobase-containing compound metabolic process; C:plastid	EC:6.3.5.5	PR00099 (PRINTS); PR00096 (PRINTS); PR00097 (PRINTS); IPR002474 (SMART); IPR006274 (TIGRFAM); IPR002474 (PFAM); IPR029062 (G3DSA:3.40.50.GENE3D); IPR017926 (PFAM); IPR002474 (G3DSA:3.50.30.GENE3D); PTHR11405 (PANTHER); IPR006274 (HAMAP); IPR017926 (PROSITE_PROFILES); IPR029062 (SUPERFAMILY); IPR002474 (SUPERFAMILY)	tr|A8IMN5|A8IMN5_CHLRE	Carbamoyl phosphate synthase, small subunit	0	tr|D8TYJ4|D8TYJ4_VOLCA	0	scaffold1.g5426.t1	0	scaffold1_size3450625	1e-17
I0YJW7_9CHLO	IMP-specific 5-nucleotidase	IMP-specific 5-nucleotidase	P:biosynthetic process; F:binding; P:nucleobase-containing compound metabolic process; F:hydrolase activity	EC:3.1; EC:3.1.3.41; EC:3.1.3.5; EC:3.1.3.31	IPR009453 (PFAM); IPR023214 (G3DSA:3.40.50.GENE3D); IPR023214 (G3DSA:3.40.50.GENE3D); PTHR28213:SF1 (PANTHER); PTHR28213 (PANTHER); IPR023214 (SUPERFAMILY)	tr|A8IT69|A8IT69_CHLRE	Predicted protein (Fragment)	2e-160	tr|D8TZT0|D8TZT0_VOLCA	2e-93	scaffold2.g6869.t1	1e-138	scaffold2_size3998120	7e-15
I0YJW8_9CHLO	Kinesin-like protein	kinesin-1 PSS1	F:nucleotide binding; C:cytoskeleton; F:protein binding; P:cellular process; F:motor activity	EC:3.6.1; EC:3.6.1.15	IPR001752 (PRINTS); IPR001752 (SMART); IPR001752 (G3DSA:3.40.850.GENE3D); IPR001752 (PFAM); IPR027640 (PANTHER); IPR001752 (PROSITE_PROFILES); IPR027417 (SUPERFAMILY)	tr|A8JC77|A8JC77_CHLRE	Kinesin-like protein (Fragment)	7e-79	tr|D8UIY4|D8UIY4_VOLCA	5e-94	scaffold2.g7511.t1	8e-55	scaffold3_size2545224	1e-29
I0YJW9_9CHLO	Sulfhydryl oxidase	sulfhydryl oxidase 2 isoform X1	C:cell; P:cellular homeostasis; F:catalytic activity; C:membrane; P:metabolic process	EC:1.8.3.2	IPR017905 (G3DSA:1.20.120.GENE3D); IPR012336 (G3DSA:3.40.30.GENE3D); IPR017905 (PFAM); IPR013766 (PFAM); PTHR22897 (PANTHER); IPR013766 (PROSITE_PROFILES); IPR017905 (PROSITE_PROFILES); IPR017905 (SUPERFAMILY); IPR012336 (SUPERFAMILY)	tr|Q5UCB7|Q5UCB7_CHLRE	Sulfhydryl oxidase	2e-31	tr|D8U000|D8U000_VOLCA	4e-72	scaffold6.g2629.t1	1e-24	scaffold6_size1922994	6e-07
I0YJX2_9CHLO	SF3A1 splicing factor 3a, subunit 1	probable splicing factor 3A subunit 1	C:nucleus; F:RNA binding; F:protein binding; P:cellular component organization; P:nucleobase-containing compound metabolic process		IPR000626 (SMART); IPR000061 (SMART); IPR022030 (PFAM); G3DSA:3.10.20.90 (GENE3D); IPR000626 (PFAM); IPR000061 (PFAM); PTHR15316 (PANTHER); PTHR15316:SF1 (PANTHER); IPR000626 (PROSITE_PROFILES); IPR000061 (PROSITE_PROFILES); IPR000061 (SUPERFAMILY); IPR029071 (SUPERFAMILY); IPR000061 (SUPERFAMILY)	tr|A8IMT5|A8IMT5_CHLRE	SF3A1 splicing factor 3a, subunit 1	5e-142	tr|D8TZ13|D8TZ13_VOLCA	8e-43	scaffold13.g243.t1	5e-45	scaffold13_size1291228	8e-17
I0YJY0_9CHLO	Long chain acyl-CoA synthetase 4	long chain acyl- synthetase 4	F:catalytic activity; P:lipid metabolic process; C:Golgi apparatus; P:biosynthetic process; C:plasma membrane; P:cellular process	EC:6.2.1.3; EC:6.2.1	G3DSA:3.30.300.30 (GENE3D); G3DSA:3.40.50.980 (GENE3D); IPR000873 (PFAM); G3DSA:2.30.38.10 (GENE3D); G3DSA:3.40.50.980 (GENE3D); PTHR24096 (PANTHER); PTHR24096:SF221 (PANTHER); SSF56801 (SUPERFAMILY)	tr|A8JH58|A8JH58_CHLRE	Predicted protein	0	tr|D8TMY5|D8TMY5_VOLCA	0	scaffold9.g3085.t1	0	scaffold9_size1652423	6e-19
I0YJY1_9CHLO	Uncharacterized protein	hypothetical protein COCSUDRAFT_45178	C:membrane		no IPS match	tr|A8IFN3|A8IFN3_CHLRE	Predicted protein	3e-11	tr|D8TZ19|D8TZ19_VOLCA	2e-22	scaffold7.g3636.t1	4e-29
I0YJY5_9CHLO	Kinase-like protein	kinase partial	F:nucleotide binding; P:cellular protein modification process; F:kinase activity		IPR001245 (PRINTS); IPR001245 (PFAM); G3DSA:1.10.510.10 (GENE3D); G3DSA:3.30.200.20 (GENE3D); PTHR23257 (PANTHER); IPR000719 (PROSITE_PROFILES); IPR011009 (SUPERFAMILY)	tr|A8I2K1|A8I2K1_CHLRE	Predicted protein	4e-59	tr|D8U978|D8U978_VOLCA	9e-59	scaffold4.g5032.t1	2e-49	scaffold2_size3998120	3e-13
I0YJY8_9CHLO	Intramolecular transferase	phosphoacetylglucosamine mutase	P:carbohydrate metabolic process; F:binding; F:transferase activity	EC:5.4.2.3	IPR016657 (PIRSF); IPR005843 (G3DSA:3.30.310.GENE3D); IPR005846 (PFAM); IPR016055 (G3DSA:3.40.120.GENE3D); IPR005843 (PFAM); IPR016055 (G3DSA:3.40.120.GENE3D); IPR005844 (PFAM); IPR016055 (G3DSA:3.40.120.GENE3D); PTHR22573:SF15 (PANTHER); PTHR22573 (PANTHER); IPR016055 (SUPERFAMILY); IPR016055 (SUPERFAMILY); IPR005843 (SUPERFAMILY); IPR016055 (SUPERFAMILY)	tr|A8IZ78|A8IZ78_CHLRE	Predicted protein	4e-151	tr|D8U2X1|D8U2X1_VOLCA	2e-159	scaffold2.g6861.t1	2e-143	scaffold2_size3998120	3e-20
I0YJZ1_9CHLO	Uncharacterized protein (Fragment)	hypothetical protein COCSUDRAFT_20327, partial	C:membrane; C:integral component of membrane		PTHR31152 (PANTHER)	tr|A8J6S0|A8J6S0_CHLRE	Predicted protein	1e-21	tr|D8U7F1|D8U7F1_VOLCA	5e-13
I0YJZ2_9CHLO	Sterol reductase	sterol reductase	C:cytoplasm; F:catalytic activity; C:membrane; P:lipid metabolic process; C:endoplasmic reticulum; P:biosynthetic process	EC:1.3.1.70	IPR001171 (PFAM); PTHR21257:SF17 (PANTHER); PTHR21257 (PANTHER)	tr|A8IA67|A8IA67_CHLRE	Sterol reductase	4e-171	tr|D8TYK0|D8TYK0_VOLCA	2e-167	scaffold6.g2849.t1	0	scaffold6_size1922994	8e-23
I0YJZ3_9CHLO	Uncharacterized protein (Fragment)	ornithine decarboxylase	F:catalytic activity; P:biosynthetic process; P:cellular process		IPR000183 (PRINTS); IPR002433 (PRINTS); IPR022643 (PFAM); IPR022644 (PFAM); IPR009006 (G3DSA:2.40.37.GENE3D); IPR029066 (G3DSA:3.20.20.GENE3D); PTHR11482 (PANTHER); PTHR11482:SF6 (PANTHER); IPR009006 (SUPERFAMILY); IPR029066 (SUPERFAMILY)	tr|A8J7E8|A8J7E8_CHLRE	Ornithine decarboxylase 1	1e-105	tr|D8UJ04|D8UJ04_VOLCA	3e-106	scaffold12.g8014.t1	2e-119	scaffold19_size774562	1e-34
I0YJZ4_9CHLO	Transketolase 7	transketolase 7	F:transferase activity; F:binding; P:nucleobase-containing compound metabolic process	EC:2.2.1.1	IPR005475 (SMART); IPR005478 (TIGRFAM); IPR029061 (G3DSA:3.40.50.GENE3D); IPR029061 (G3DSA:3.40.50.GENE3D); IPR033248 (PFAM); IPR005475 (PFAM); IPR005474 (PFAM); IPR009014 (G3DSA:3.40.50.GENE3D); IPR033247 (PANTHER); PTHR11624:SF81 (PANTHER); IPR029061 (SUPERFAMILY); IPR029061 (SUPERFAMILY); IPR009014 (SUPERFAMILY)	tr|A8IAN1|A8IAN1_CHLRE	Transketolase	0	tr|D8U4Q1|D8U4Q1_VOLCA	0	scaffold6.g2496.t1	0	scaffold6_size1922994	1e-58
I0YJZ5_9CHLO	DUF163-domain-containing protein (Fragment)	RNA methyltransferase At5g10620	C:cytoplasm; F:transferase activity; P:nucleobase-containing compound metabolic process		IPR003742 (PIRSF); IPR003742 (PFAM); IPR029026 (G3DSA:3.40.1280.GENE3D); PTHR33603:SF1 (PANTHER); PTHR33603 (PANTHER); IPR003742 (HAMAP); IPR029028 (SUPERFAMILY)	tr|A8J3V1|A8J3V1_CHLRE	Predicted protein	4e-63	tr|D8TT33|D8TT33_VOLCA	3e-60			scaffold1_size3450625	1e-17
I0YJZ8_9CHLO	Threonine dehydratase	threonine deaminase	C:cytoplasm; F:catalytic activity; P:biosynthetic process; F:binding; P:cellular process	EC:4.3.1.19	IPR001721 (PFAM); G3DSA:3.40.50.1100 (GENE3D); IPR001926 (PFAM); G3DSA:3.40.1020.10 (GENE3D); IPR005787 (TIGRFAM); PTHR10314:SF30 (PANTHER); PTHR10314 (PANTHER); IPR001721 (PROSITE_PROFILES); SSF55021 (SUPERFAMILY); SSF55021 (SUPERFAMILY); IPR001926 (SUPERFAMILY)	tr|A8I9R1|A8I9R1_CHLRE	Threonine dehydratase	0	tr|D8TPW3|D8TPW3_VOLCA	1e-162	scaffold9.g3239.t1	4e-86	scaffold2_size3998120	5e-14
I0YJZ9_9CHLO	L domain-like protein	LRR repeats and ubiquitin-like domain-containing At2g30105	F:protein binding		SM00364 (SMART); IPR003591 (SMART); IPR000626 (PFAM); G3DSA:3.10.20.90 (GENE3D); IPR001611 (PFAM); IPR032675 (G3DSA:3.80.10.GENE3D); PTHR23155 (PANTHER); IPR001611 (PROSITE_PROFILES); IPR000626 (PROSITE_PROFILES); IPR032675 (SUPERFAMILY); IPR029071 (SUPERFAMILY)	tr|A8IJL5|A8IJL5_CHLRE	Predicted protein	2e-58	tr|D8U350|D8U350_VOLCA	2e-54	scaffold1.g5295.t1	1e-71	scaffold1_size3450625	4e-41
I0YK01_9CHLO	Uncharacterized protein	methanol dehydrogenase	C:membrane		PTHR35514:SF1 (PANTHER); PTHR35514 (PANTHER)	tr|A8J7M1|A8J7M1_CHLRE	Predicted protein (Fragment)	7e-65	tr|D8TUE5|D8TUE5_VOLCA	2e-69	scaffold6.g2803.t1	1e-32	scaffold6_size1922994	3e-13
I0YK02_9CHLO	Uncharacterized protein	Carotene biosynthesis-related CBR	C:membrane		IPR022796 (PFAM); G3DSA:1.20.1620.10 (GENE3D); SSF103511 (SUPERFAMILY)	tr|A8J0A7|A8J0A7_CHLRE	Early light-inducible protein	2e-15	tr|D8TLD7|D8TLD7_VOLCA	9e-17	scaffold9.g3027.t1	2e-18
I0YK04_9CHLO	Uncharacterized protein	hypothetical protein COCSUDRAFT_54867	C:membrane		no IPS match	tr|A8IZC3|A8IZC3_CHLRE	Predicted protein	2e-19	tr|D8U2P5|D8U2P5_VOLCA	2e-13	scaffold1.g5216.t1	6e-25	scaffold1_size3450625	3e-13
I0YK05_9CHLO	Fcf1-domain-containing protein	rRNA-processing FCF1 homolog	C:nucleolus; P:nucleobase-containing compound metabolic process		IPR002716 (SMART); IPR006984 (PFAM); IPR029060 (G3DSA:3.40.50.GENE3D); PTHR12416:SF2 (PANTHER); PTHR12416 (PANTHER); IPR029060 (SUPERFAMILY)	tr|A8J3T9|A8J3T9_CHLRE	Predicted protein	4e-116	tr|D8TSW5|D8TSW5_VOLCA	3e-120	scaffold1.g5215.t1	7e-110	scaffold1_size3450625	1e-25
I0YK06_9CHLO	Uncharacterized protein	multiple RNA-binding domain-containing 1	F:nucleotide binding; F:nucleic acid binding		IPR000504 (SMART); IPR012677 (G3DSA:3.30.70.GENE3D); IPR000504 (PFAM); IPR012677 (G3DSA:3.30.70.GENE3D); IPR012677 (G3DSA:3.30.70.GENE3D); IPR012677 (G3DSA:3.30.70.GENE3D); PTHR24012 (PANTHER); PTHR24012:SF477 (PANTHER); IPR000504 (PROSITE_PROFILES); IPR012677 (SUPERFAMILY); IPR012677 (SUPERFAMILY); IPR012677 (SUPERFAMILY); IPR012677 (SUPERFAMILY)	tr|A8HME6|A8HME6_CHLRE	Polyadenylate-binding protein	3e-13	tr|D8U346|D8U346_VOLCA	4e-155	scaffold1.g5214.t1	2e-167	scaffold1_size3450625	3e-38
I0YK10_9CHLO	DEAD-domain-containing protein	DEAD-box ATP-dependent RNA helicase 42	F:nucleotide binding; F:RNA binding; P:nucleobase-containing compound metabolic process; F:hydrolase activity	EC:3.6.1; EC:3.6.1.3; EC:2.7.7; EC:3.6.1.15	IPR014001 (SMART); IPR001650 (SMART); IPR001650 (PFAM); IPR027417 (G3DSA:3.40.50.GENE3D); IPR011545 (PFAM); IPR004088 (G3DSA:3.30.1370.GENE3D); IPR027417 (G3DSA:3.40.50.GENE3D); PTHR24031:SF25 (PANTHER); PTHR24031 (PANTHER); IPR001650 (PROSITE_PROFILES); IPR014001 (PROSITE_PROFILES); IPR014014 (PROSITE_PROFILES); IPR027417 (SUPERFAMILY)	tr|A8J3N3|A8J3N3_CHLRE	Predicted protein (Fragment)	0	tr|D8TSV0|D8TSV0_VOLCA	0	scaffold1.g5469.t1	0	scaffold37_size123908	2e-59
I0YK11_9CHLO	Uncharacterized protein	probable L-ascorbate peroxidase chloroplastic isoform X2	F:catalytic activity; C:membrane; P:metabolic process; F:binding; P:response to stress; P:cellular process	EC:1.11.1.7	IPR002207 (PRINTS); IPR002016 (PRINTS); IPR002016 (PFAM); G3DSA:1.10.420.10 (GENE3D); G3DSA:1.10.520.10 (GENE3D); PTHR31356:SF1 (PANTHER); PTHR31356 (PANTHER); IPR002016 (PROSITE_PROFILES); IPR010255 (SUPERFAMILY)	tr|O49822|O49822_CHLRE	Ascorbate peroxidase	2e-107	tr|D8U4R0|D8U4R0_VOLCA	8e-112	scaffold1.g5427.t1	4e-98	scaffold1_size3450625	4e-25
I0YK12_9CHLO	Stromal ascorbate peroxidase	probable L-ascorbate peroxidase chloroplastic isoform X2	F:catalytic activity; P:metabolic process; F:binding; P:response to stress; P:cellular process	EC:1.11.1.7	IPR002016 (PRINTS); IPR002207 (PRINTS); G3DSA:1.10.520.10 (GENE3D); IPR002016 (PFAM); G3DSA:1.10.420.10 (GENE3D); PTHR31356:SF1 (PANTHER); PTHR31356 (PANTHER); IPR002016 (PROSITE_PROFILES); IPR010255 (SUPERFAMILY)	tr|O49822|O49822_CHLRE	Ascorbate peroxidase	3e-110	tr|D8U4R0|D8U4R0_VOLCA	1e-112	scaffold1.g5427.t1	2e-107	scaffold1_size3450625	4e-32
I0YK13_9CHLO	Uncharacterized protein	hypothetical protein COCSUDRAFT_60039	P:biosynthetic process; F:transferase activity; P:cellular process	EC:2.3.1	IPR016181 (G3DSA:3.40.630.GENE3D); IPR000182 (PFAM); IPR000182 (PROSITE_PROFILES); IPR016181 (SUPERFAMILY)	tr|A8JAQ3|A8JAQ3_CHLRE	Predicted protein	6e-23	tr|D8TH66|D8TH66_VOLCA	7e-19
I0YK17_9CHLO	Aldo/keto reductase	Aldo keto reductase	F:catalytic activity; P:metabolic process		IPR020471 (PRINTS); IPR023210 (G3DSA:3.20.20.GENE3D); IPR023210 (PFAM); IPR001395 (PANTHER); PTHR11732:SF213 (PANTHER); IPR023210 (SUPERFAMILY)	tr|A8JFJ4|A8JFJ4_CHLRE	Predicted protein (Fragment)	3e-109	tr|D8TS35|D8TS35_VOLCA	8e-126	scaffold1.g5317.t1	4e-89	scaffold1_size3450625	9e-22
I0YK19_9CHLO	Metallo-dependent phosphatase	Metallo-dependent phosphatase	C:membrane; F:hydrolase activity		IPR004843 (PFAM); IPR029052 (G3DSA:3.60.21.GENE3D); PTHR24032 (PANTHER); IPR029052 (SUPERFAMILY)	tr|A8HQK6|A8HQK6_CHLRE	Predicted protein (Fragment)	2e-25	tr|D8U9U5|D8U9U5_VOLCA	8e-55	scaffold5.g920.t1	5e-54
I0YK20_9CHLO	Methionine adenosyltransferase regulatory beta subunit-related	methionine adenosyltransferase 2 subunit beta	F:transferase activity		IPR016040 (G3DSA:3.40.50.GENE3D); IPR029903 (PFAM); IPR005913 (PANTHER); PTHR10491:SF7 (PANTHER); IPR016040 (SUPERFAMILY)	tr|A8JIH9|A8JIH9_CHLRE	Predicted protein	9e-83	tr|D8TTB7|D8TTB7_VOLCA	4e-75	scaffold1.g5392.t1	6e-71	scaffold1_size3450625	3e-14
I0YK21_9CHLO	Uncharacterized protein	EH domain-containing 1-like	F:nucleotide binding; F:protein binding		IPR000261 (SMART); IPR027417 (G3DSA:3.40.50.GENE3D); IPR022812 (PFAM); IPR000261 (PFAM); IPR031692 (PFAM); IPR011992 (G3DSA:1.10.238.GENE3D); PTHR11216:SF31 (PANTHER); PTHR11216 (PANTHER); IPR030381 (PROSITE_PROFILES); IPR002048 (PROSITE_PROFILES); IPR000261 (PROSITE_PROFILES); IPR011992 (SUPERFAMILY); IPR027417 (SUPERFAMILY)	tr|A8JGY8|A8JGY8_CHLRE	Sarcaleumin-like protein	3e-13	tr|D8TI11|D8TI11_VOLCA	0	scaffold1.g5433.t1	6e-175	scaffold1_size3450625	1e-21
I0YK24_9CHLO	Probable cytosolic iron-sulfur protein assembly protein CIAO1 homolog	WD40 repeat	F:protein binding; P:cellular component organization; C:cytosol; P:biosynthetic process		IPR020472 (PRINTS); IPR001680 (SMART); IPR015943 (G3DSA:2.130.10.GENE3D); IPR001680 (PFAM); IPR015943 (G3DSA:2.130.10.GENE3D); PTHR19920 (PANTHER); PTHR19920:SF0 (PANTHER); IPR001680 (PROSITE_PROFILES); IPR028608 (HAMAP); IPR017986 (PROSITE_PROFILES); IPR017986 (SUPERFAMILY)	sp|A8IZG4|CIAO1_CHLRE	Probable cytosolic iron-sulfur protein assembly protein CIAO1 homolog	5e-129	tr|D8U2P0|D8U2P0_VOLCA	4e-117	scaffold1.g5430.t1	2e-127	scaffold1_size3450625	9e-48
I0YK30_9CHLO	Uncharacterized protein	NADH pyrophosphatase	F:hydrolase activity		IPR007702 (PFAM); IPR015375 (PFAM); IPR000086 (PFAM); IPR015797 (G3DSA:3.90.79.GENE3D); PTHR22769 (PANTHER); PTHR22769:SF7 (PANTHER); IPR000086 (PROSITE_PROFILES); IPR015797 (SUPERFAMILY); SSF143724 (SUPERFAMILY)	tr|A8J005|A8J005_CHLRE	Predicted protein (Fragment)	2e-15	tr|D8U965|D8U965_VOLCA	1e-29	scaffold1.g5196.t1	4e-24	scaffold1_size3450625	4e-06
I0YK32_9CHLO	Six-hairpin glycosidase	Six-hairpin glycosidase	P:carbohydrate metabolic process; F:hydrolase activity		IPR001701 (PFAM); IPR012341 (G3DSA:1.50.10.GENE3D); PTHR22298 (PANTHER); PTHR22298:SF39 (PANTHER); IPR008928 (SUPERFAMILY)	tr|A8JFG8|A8JFG8_CHLRE	Endoglucanase (Fragment)	3e-19	tr|D8UIZ8|D8UIZ8_VOLCA	2e-23	scaffold20.g7775.t1	1e-17	scaffold20_size1437327	6e-07
I0YK34_9CHLO	Six-hairpin glycosidase	Six-hairpin glycosidase	P:carbohydrate metabolic process; F:hydrolase activity		IPR001623 (SMART); PF13370 (PFAM); IPR012341 (G3DSA:1.50.10.GENE3D); IPR001701 (PFAM); G3DSA:3.30.70.20 (GENE3D); IPR001623 (G3DSA:1.10.287.GENE3D); PTHR22298 (PANTHER); PTHR22298:SF39 (PANTHER); IPR001623 (PROSITE_PROFILES); IPR017896 (PROSITE_PROFILES); SSF54862 (SUPERFAMILY); IPR001623 (SUPERFAMILY); IPR008928 (SUPERFAMILY)	tr|A8I6Z0|A8I6Z0_CHLRE	Chloroplast DnaJ-like protein	7e-39	tr|D8TY56|D8TY56_VOLCA	2e-37	scaffold2.g7272.t1	1e-38
I0YK35_9CHLO	Kinase-like protein	kinase	F:nucleotide binding; C:membrane; P:cellular protein modification process; F:kinase activity	EC:2.7.11	IPR000719 (SMART); G3DSA:3.30.200.20 (GENE3D); IPR001245 (PFAM); G3DSA:1.10.510.10 (GENE3D); PTHR23257 (PANTHER); IPR000719 (PROSITE_PROFILES); PS51257 (PROSITE_PROFILES); IPR011009 (SUPERFAMILY)	tr|A8JCP2|A8JCP2_CHLRE	Predicted protein	6e-36	tr|D8U978|D8U978_VOLCA	1e-36	scaffold1.g5599.t1	2e-37	scaffold8_size1730130	3e-10
I0YK36_9CHLO	Kinase-like protein	kinase	F:nucleotide binding; C:membrane; P:cellular protein modification process; F:kinase activity		IPR000719 (SMART); IPR001245 (PFAM); G3DSA:1.10.510.10 (GENE3D); G3DSA:3.30.200.20 (GENE3D); PTHR23257 (PANTHER); IPR000719 (PROSITE_PROFILES); IPR011009 (SUPERFAMILY)	tr|A8JCP2|A8JCP2_CHLRE	Predicted protein	5e-36	tr|D8U978|D8U978_VOLCA	4e-33	scaffold1.g5599.t1	1e-35	scaffold3_size2545224	9e-09
I0YK37_9CHLO	ABC family transporter: multidrug (Fragment)	ABC family transporter: partial	F:nucleotide binding; C:membrane; F:hydrolase activity	EC:3.6.1; EC:3.6.1.3; EC:3.6.1.15	IPR013525 (PFAM); IPR003439 (PFAM); IPR027417 (G3DSA:3.40.50.GENE3D); PTHR19241 (PANTHER); IPR003439 (PROSITE_PROFILES); IPR027417 (SUPERFAMILY)	tr|A8IVZ2|A8IVZ2_CHLRE	Predicted protein	5e-54	tr|D8U6E1|D8U6E1_VOLCA	2e-124	scaffold19.g1828.t1	1e-106	scaffold19_size774562	1e-11
I0YK41_9CHLO	Uncharacterized protein	Endoplasmic reticulum metallopeptidase 1	C:membrane		IPR007484 (PFAM); G3DSA:3.40.630.10 (GENE3D); PTHR12147:SF22 (PANTHER); PTHR12147 (PANTHER); SSF53187 (SUPERFAMILY)	tr|A8I3S3|A8I3S3_CHLRE	Predicted protein	6e-89	tr|D8UDI2|D8UDI2_VOLCA	1e-48	scaffold1.g5787.t1	1e-70	scaffold1_size3450625	3e-10
I0YK42_9CHLO	Pkinase-domain-containing protein	cyclin-dependent kinase D-3-like	F:nucleotide binding; P:cellular protein modification process; F:kinase activity	EC:2.7.11	IPR000719 (SMART); IPR000719 (PFAM); G3DSA:3.30.200.20 (GENE3D); G3DSA:1.10.510.10 (GENE3D); PTHR24056:SF0 (PANTHER); PTHR24056 (PANTHER); IPR000719 (PROSITE_PROFILES); IPR011009 (SUPERFAMILY)	tr|A8IZJ9|A8IZJ9_CHLRE	CDK activating kinase	2e-102	tr|D8U821|D8U821_VOLCA	6e-108	scaffold8.g1381.t1	4e-119	scaffold8_size1730130	7e-27
I0YK44_9CHLO	Uncharacterized protein	P-loop containing nucleoside triphosphate hydrolase	F:nucleotide binding; C:membrane; F:hydrolase activity	EC:3.6.1; EC:3.6.1.3; EC:3.6.1.15	IPR003593 (SMART); IPR027417 (G3DSA:3.40.50.GENE3D); IPR027417 (G3DSA:3.40.50.GENE3D); IPR013525 (PFAM); PTHR19241 (PANTHER); IPR003439 (PROSITE_PROFILES); IPR027417 (SUPERFAMILY)	tr|A8IEX1|A8IEX1_CHLRE	Predicted protein (Fragment)	2e-68	tr|D8ULB6|D8ULB6_VOLCA	1e-37	scaffold13.g413.t1	1e-106	scaffold42_size96234	2e-09
I0YK47_9CHLO	Ribosomal protein S11 component of cytosolic 80S ribosome and 40S small subunit	40S ribosomal S11	F:structural molecule activity; C:cytosol; C:ribosome; P:translation		IPR000266 (PRINTS); IPR028333 (TIGRFAM); G3DSA:2.40.50.140 (GENE3D); IPR000266 (PFAM); IPR032440 (PFAM); PTHR10744:SF10 (PANTHER); IPR000266 (PANTHER); IPR000266 (PRODOM); IPR000266 (HAMAP); IPR012340 (SUPERFAMILY)	tr|A8JHC3|A8JHC3_CHLRE	Ribosomal protein S11	4e-87	tr|D8TNR5|D8TNR5_VOLCA	3e-89	scaffold2.g6875.t1	5e-80	scaffold2_size3998120	5e-09
I0YK48_9CHLO	Uncharacterized protein	Tbc2 translation chloroplastic	C:membrane		IPR013584 (SMART); IPR011632 (PFAM); IPR013584 (PFAM); PTHR21228 (PANTHER); PTHR21228:SF20 (PANTHER); IPR013584 (PROSITE_PROFILES)	tr|A8JA15|A8JA15_CHLRE	Predicted protein of CLR family	1e-37	tr|D8TMF6|D8TMF6_VOLCA	1e-41	scaffold11.g3995.t1	5e-53	scaffold11_size1415723	3e-27
I0YK49_9CHLO	Uncharacterized protein	SWI SNF-related matrix-associated actin-dependent regulator of chromatin subfamily A 1 isoform X1	F:nucleotide binding		IPR014001 (SMART); IPR001650 (SMART); IPR027417 (G3DSA:3.40.50.GENE3D); IPR001650 (PFAM); IPR027417 (G3DSA:3.40.50.GENE3D); IPR000330 (PFAM); PTHR10799 (PANTHER); IPR001650 (PROSITE_PROFILES); IPR014001 (PROSITE_PROFILES); IPR027417 (SUPERFAMILY); IPR027417 (SUPERFAMILY)	tr|A8J8C2|A8J8C2_CHLRE	SNF2 superfamily protein (Fragment)	9e-69	tr|D8TLQ2|D8TLQ2_VOLCA	3e-71	scaffold2.g6963.t1	1e-81	scaffold8_size1730130	1e-14
I0YK51_9CHLO	RNA-binding domain-containing protein	RNA-binding domain-containing	F:nucleotide binding; F:RNA binding; C:intracellular		IPR000504 (SMART); IPR003954 (SMART); IPR012677 (G3DSA:3.30.70.GENE3D); IPR012677 (G3DSA:3.30.70.GENE3D); IPR000504 (PFAM); PTHR24012:SF31 (PANTHER); PTHR24012 (PANTHER); IPR000504 (PROSITE_PROFILES); IPR012677 (SUPERFAMILY); IPR012677 (SUPERFAMILY); IPR012677 (SUPERFAMILY)	tr|A8HME6|A8HME6_CHLRE	Polyadenylate-binding protein	7e-30	tr|D8U5R4|D8U5R4_VOLCA	5e-31	scaffold14.g1281.t1	5e-106	scaffold14_size1568905	1e-10
I0YK52_9CHLO	Uncharacterized protein	NASP-related sim3-like	F:protein binding		IPR019544 (PFAM); IPR011990 (G3DSA:1.25.40.GENE3D); PTHR15081:SF1 (PANTHER); PTHR15081 (PANTHER); IPR013026 (PROSITE_PROFILES); IPR019734 (PROSITE_PROFILES); IPR011990 (SUPERFAMILY)	tr|A8J211|A8J211_CHLRE	Predicted protein	3e-18	tr|D8UIX9|D8UIX9_VOLCA	2e-39	scaffold2.g7057.t1	2e-25
I0YK53_9CHLO	Uncharacterized protein	hypothetical protein COCSUDRAFT_60075	F:peptidyl-prolyl cis-trans isomerase activity; C:membrane; C:integral component of membrane; P:protein peptidyl-prolyl isomerization; P:protein folding; F:isomerase activity		PTHR33645 (PANTHER); PTHR33645:SF2 (PANTHER)	tr|A8I6P4|A8I6P4_CHLRE	Predicted protein	1e-41	tr|D8U6H1|D8U6H1_VOLCA	6e-40	scaffold3.g6555.t1	2e-27	scaffold3_size2545224	2e-08
I0YK54_9CHLO	Uncharacterized protein	hypothetical protein COCSUDRAFT_68195	C:membrane		IPR022227 (PFAM); PTHR33645 (PANTHER)	tr|A8I6P4|A8I6P4_CHLRE	Predicted protein	2e-34	tr|D8U6H1|D8U6H1_VOLCA	2e-51	scaffold3.g6692.t1	1e-27	scaffold1_size3450625	1e-11
I0YK56_9CHLO	Uncharacterized protein	MFS general substrate transporter	C:membrane; F:transporter activity		IPR024371 (PFAM); PTHR12778 (PANTHER); PTHR12778:SF9 (PANTHER); IPR020846 (SUPERFAMILY)	tr|A8ITI8|A8ITI8_CHLRE	Flagellar/basal body protein (Fragment)	2e-127	tr|D8TZE8|D8TZE8_VOLCA	7e-163	scaffold2.g7032.t1	3e-82	scaffold2_size3998120	1e-14
I0YK58_9CHLO	EF-hand	mitochondrial carrier	F:binding		IPR002048 (SMART); IPR011992 (G3DSA:1.10.238.GENE3D); IPR002048 (PFAM); PTHR10891 (PANTHER); IPR002048 (PROSITE_PROFILES); IPR011992 (SUPERFAMILY)	tr|A8IDP6|A8IDP6_CHLRE	Calmodulin	5e-16	tr|D8TKN5|D8TKN5_VOLCA	2e-15	scaffold12.g8156.t1	5e-18	scaffold2_size3998120	3e-06
I0YK59_9CHLO	Metal-dependent protein hydrolase	UPF0160 -like	F:hydrolase activity		IPR003226 (PFAM); IPR003226 (PANTHER); PTHR11215:SF1 (PANTHER)	tr|A8JGS3|A8JGS3_CHLRE	MYG1/GAMM1-like protein	5e-136	tr|D8UAF4|D8UAF4_VOLCA	3e-144	scaffold2.g7019.t1	2e-137	scaffold2_size3998120	1e-21
I0YK61_9CHLO	Barwin-like endoglucanase	barwin-like endoglucanase	C:extracellular region		IPR007118 (PRINTS); IPR009009 (G3DSA:2.40.40.GENE3D); IPR009009 (PFAM); IPR007117 (PFAM); IPR007117 (G3DSA:2.60.40.GENE3D); PTHR31867:SF1 (PANTHER); PTHR31867 (PANTHER); IPR007117 (PROSITE_PROFILES); IPR007112 (PROSITE_PROFILES); IPR009009 (SUPERFAMILY); IPR007117 (SUPERFAMILY)	tr|A8IT94|A8IT94_CHLRE	Predicted protein	1e-15	tr|D8U189|D8U189_VOLCA	1e-34	scaffold7.g3760.t1	1e-63	scaffold7_size1837125	8e-15
I0YK63_9CHLO	Putative histone H2B	histone H2B	C:nucleus; F:DNA binding; F:protein binding; P:cellular component organization		IPR000558 (PRINTS); IPR000558 (SMART); IPR007125 (PFAM); IPR009072 (G3DSA:1.10.20.GENE3D); IPR000558 (PANTHER); PTHR23428:SF53 (PANTHER); IPR009072 (SUPERFAMILY)	tr|A8JJN6|A8JJN6_CHLRE	Histone H2B	8e-39	tr|D8U9Y1|D8U9Y1_VOLCA	1e-38	scaffold12.g8167.t1	1e-40	scaffold7_size1837125	4e-32
I0YK64_9CHLO	Beta-glucosidase	beta-glucosidase 40-like	P:carbohydrate metabolic process; P:catabolic process; P:cellular process; F:hydrolase activity	EC:3.2.1.21; EC:3.2.1	IPR001360 (PRINTS); IPR001360 (PFAM); IPR017736 (TIGRFAM); IPR013781 (G3DSA:3.20.20.GENE3D); IPR001360 (PANTHER); IPR017853 (SUPERFAMILY)	tr|A8I718|A8I718_CHLRE	Predicted protein	2e-34	tr|D8UBE1|D8UBE1_VOLCA	7e-34	scaffold20.g7829.t1	2e-20
I0YK65_9CHLO	Uncharacterized protein (Fragment)	SWR1 complex SNF2 family DNA-dependent ATPase	F:nucleotide binding; F:hydrolase activity	EC:3.6.1; EC:3.6.1.15	IPR014012 (SMART); IPR014001 (SMART); IPR001650 (SMART); IPR000330 (PFAM); IPR001650 (PFAM); IPR014012 (PFAM); IPR027417 (G3DSA:3.40.50.GENE3D); IPR027417 (G3DSA:3.40.50.GENE3D); PTHR10799 (PANTHER); PTHR10799:SF603 (PANTHER); IPR014001 (PROSITE_PROFILES); IPR014012 (PROSITE_PROFILES); IPR001650 (PROSITE_PROFILES); IPR027417 (SUPERFAMILY); IPR027417 (SUPERFAMILY)	tr|Q4JLR9|Q4JLR9_CHLRE	Chromatin-remodelling complex ATPase ISWI2	4e-78	tr|D8TP34|D8TP34_VOLCA	2e-79	scaffold18.g1966.t1	4e-74	scaffold20_size1437327	1e-22
I0YK67_9CHLO	Dienelactone hydrolase (Fragment)	carboxymethylenebutenolidase homolog	C:cytoplasm; F:hydrolase activity		IPR002925 (PFAM); IPR029058 (G3DSA:3.40.50.GENE3D); PTHR17630 (PANTHER); IPR029058 (SUPERFAMILY)	tr|A8JFK2|A8JFK2_CHLRE	Predicted protein (Fragment)	1e-47	tr|D8TJI7|D8TJI7_VOLCA	7e-35	scaffold8.g1466.t1	2e-38
I0YK69_9CHLO	Mitochondrial glyco protein (Fragment)	mitochondrial glyco partial	C:mitochondrion		IPR003428 (PFAM); IPR003428 (G3DSA:3.10.280.GENE3D); PTHR10826:SF1 (PANTHER); PTHR10826 (PANTHER); IPR003428 (SUPERFAMILY)	tr|A8IT66|A8IT66_CHLRE	Predicted protein	4e-29	tr|D8UEL6|D8UEL6_VOLCA	3e-30	scaffold2.g6985.t1	6e-22
I0YK70_9CHLO	Uncharacterized protein (Fragment)	MYC-induced nuclear antigen			IPR003347 (PFAM); G3DSA:2.60.120.650 (GENE3D); PTHR13096 (PANTHER); SSF51197 (SUPERFAMILY)	tr|A8JI70|A8JI70_CHLRE	Predicted protein	3e-39	tr|D8UEA8|D8UEA8_VOLCA	2e-33	scaffold6.g2762.t1	1e-20
I0YK71_9CHLO	Uncharacterized protein	Transmembrane 205	C:membrane		IPR025423 (PFAM); PTHR23241 (PANTHER)	tr|A8J716|A8J716_CHLRE	Predicted protein (Fragment)	2e-24	tr|D8U8H6|D8U8H6_VOLCA	1e-41			scaffold16_size857609	4e-17
I0YK73_9CHLO	ARM repeat-containing protein	eukaryotic translation initiation factor 4G	F:RNA binding; F:protein binding		IPR003890 (SMART); IPR003890 (PFAM); IPR016021 (G3DSA:1.25.40.GENE3D); IPR016021 (G3DSA:1.25.40.GENE3D); IPR016021 (G3DSA:1.25.40.GENE3D); PTHR23253:SF9 (PANTHER); PTHR23253 (PANTHER); IPR003307 (PROSITE_PROFILES); IPR003891 (PROSITE_PROFILES); IPR016024 (SUPERFAMILY); IPR016024 (SUPERFAMILY)	tr|A8IQZ3|A8IQZ3_CHLRE	Predicted protein (Fragment)	7e-80	tr|D8TR80|D8TR80_VOLCA	3e-73	scaffold12.g8178.t1	6e-66	scaffold12_size2011427	8e-07
I0YK74_9CHLO	Sin3 complex component	Sin3 complex component	P:response to abiotic stimulus; C:nucleolus; P:response to stress		IPR010516 (PFAM); IPR010516 (PANTHER)	tr|A8J1N7|A8J1N7_CHLRE	Sin3 complex component (Fragment)	1e-49	tr|D8TL43|D8TL43_VOLCA	3e-57	scaffold2.g6996.t1	7e-53	scaffold2_size3998120	5e-13
I0YK75_9CHLO	Uncharacterized protein	eukaryotic peptide chain release factor GTP-binding subunit ERF3A-like isoform X1 [Tarenaya hassleriana]	F:nucleotide binding; F:translation factor activity, RNA binding; C:ribosome; F:hydrolase activity	EC:3.6.1; EC:3.6.1.15	IPR000795 (PRINTS); G3DSA:2.40.30.10 (GENE3D); IPR004160 (PFAM); G3DSA:2.40.30.10 (GENE3D); IPR027417 (G3DSA:3.40.50.GENE3D); PF00009 (PFAM); PTHR23115 (PANTHER); PTHR23115:SF36 (PANTHER); IPR000795 (PROSITE_PROFILES); IPR027417 (SUPERFAMILY); IPR009001 (SUPERFAMILY); IPR009000 (SUPERFAMILY)	tr|A8J280|A8J280_CHLRE	Elongation factor-like protein (Fragment)	0	tr|D8UJ87|D8UJ87_VOLCA	0	scaffold1.g5761.t1	0	scaffold41_size205970	2e-31
I0YK76_9CHLO	Uncharacterized protein	hypothetical protein COCSUDRAFT_26256	F:catalytic activity; P:metabolic process; C:extracellular region; C:plastid		IPR013328 (G3DSA:1.10.1040.GENE3D); PTHR34044 (PANTHER)	tr|A8IGI0|A8IGI0_CHLRE	Predicted protein	1e-117	tr|D8THB6|D8THB6_VOLCA	1e-112	scaffold3.g6592.t1	5e-109	scaffold3_size2545224	4e-13
I0YK78_9CHLO	Uncharacterized protein	hypothetical protein COCSUDRAFT_20416			IPR021848 (PFAM)	tr|A8IVD9|A8IVD9_CHLRE	Predicted protein (Fragment)	1e-39	tr|D8TWT5|D8TWT5_VOLCA	2e-26
I0YK79_9CHLO	Proteasome subunit beta type	20S proteasome beta type 4	C:nucleus; P:protein metabolic process; P:catabolic process; C:cytosol; P:cellular process; F:hydrolase activity	EC:3.4.25	IPR001353 (PFAM); IPR029055 (G3DSA:3.60.20.GENE3D); PTHR11599:SF5 (PANTHER); PTHR11599 (PANTHER); IPR023333 (PROSITE_PROFILES); IPR029055 (SUPERFAMILY)	tr|A8J212|A8J212_CHLRE	Proteasome subunit beta type	8e-129	tr|D8UIU8|D8UIU8_VOLCA	2e-127	scaffold2.g6992.t1	7e-118	scaffold2_size3998120	9e-17
I0YK82_9CHLO	Uncharacterized protein	IMP-specific 5 -nucleotidase 1	C:membrane; P:biosynthetic process; F:binding; P:nucleobase-containing compound metabolic process; F:hydrolase activity	EC:3.1; EC:3.1.3.41; EC:3.1.3.5; EC:3.1.3.31	no IPS match	tr|A8IT69|A8IT69_CHLRE	Predicted protein (Fragment)	1e-11	tr|D8TZT0|D8TZT0_VOLCA	1e-22	scaffold2.g6869.t1	2e-28	scaffold2_size3998120	1e-09
I0YK84_9CHLO	Uncharacterized protein	hypothetical protein COCSUDRAFT_59934	F:zinc ion binding; F:metal ion binding; C:membrane; C:integral component of membrane		PTHR21530 (PANTHER)	tr|A8JDS6|A8JDS6_CHLRE	Predicted protein	1e-32	tr|D8TPI4|D8TPI4_VOLCA	2e-95	scaffold5.g855.t1	3e-31	scaffold5_size2028652	7e-07
I0YK88_9CHLO	Katanin-like protein	katanin p60 ATPase-containing subunit A1	F:nucleotide binding; C:nucleus; C:cytoskeleton; F:protein binding; C:cytoplasm; P:cellular component organization; F:hydrolase activity	EC:3.6.1; EC:3.6.1.3; EC:3.6.1.15; EC:3.6.4.3	IPR003593 (SMART); IPR015415 (PFAM); G3DSA:1.10.8.60 (GENE3D); IPR003959 (PFAM); IPR027417 (G3DSA:3.40.50.GENE3D); PTHR23074:SF19 (PANTHER); PTHR23074 (PANTHER); IPR027417 (SUPERFAMILY)	tr|Q9SNV7|Q9SNV7_CHLRE	Katanin p60 ATPase-containing subunit A1	7e-142	tr|D8U666|D8U666_VOLCA	3e-139	scaffold19.g1769.t1	4e-116	scaffold2_size3998120	7e-25
I0YK89_9CHLO	Uncharacterized protein	activating signal cointegrator 1	C:nucleus; F:zinc ion binding; P:regulation of transcription, DNA-templated		PTHR12963 (PANTHER)	tr|A8J4S8|A8J4S8_CHLRE	Predicted protein (Fragment)	6e-21	tr|D8TX82|D8TX82_VOLCA	7e-35	scaffold3.g6420.t1	2e-36	scaffold3_size2545224	2e-09
I0YK90_9CHLO	Glycerol-3-phosphate O-acyltransferase	glycerol-3-phosphate chloroplastic-like isoform X1	P:lipid metabolic process; P:biosynthetic process; F:transferase activity; C:plastid; P:cellular process	EC:2.3.1.15; EC:2.3.1	IPR002123 (SMART); IPR016222 (PIRSF); IPR023083 (G3DSA:1.10.1200.GENE3D); G3DSA:3.40.1130.10 (GENE3D); IPR002123 (PFAM); IPR023083 (PFAM); PTHR35695:SF1 (PANTHER); PTHR35695 (PANTHER); SSF69593 (SUPERFAMILY)	tr|A8J0R2|A8J0R2_CHLRE	Glycerol-3-phosphate acyltransferase	3e-142	tr|D8TVT7|D8TVT7_VOLCA	2e-138	scaffold7.g3400.t1	9e-118	scaffold7_size1837125	4e-12
I0YK91_9CHLO	NUC189-domain-containing protein	WD repeat-containing 43	F:protein binding		IPR001680 (SMART); IPR007148 (PFAM); IPR015943 (G3DSA:2.130.10.GENE3D); PTHR22847 (PANTHER); IPR017986 (PROSITE_PROFILES); IPR001680 (PROSITE_PROFILES); IPR011047 (SUPERFAMILY)	tr|A8IVB9|A8IVB9_CHLRE	Predicted protein (Fragment)	7e-77	tr|D8TWP6|D8TWP6_VOLCA	4e-83	scaffold8.g1574.t1	1e-49	scaffold8_size1730130	4e-07
I0YK92_9CHLO	Ribosomal protein L6	50S ribosomal chloroplastic	F:RNA binding; F:structural molecule activity; C:ribosome; P:translation		IPR019906 (PRINTS); IPR020040 (PFAM); IPR020040 (G3DSA:3.90.930.GENE3D); IPR019906 (TIGRFAM); IPR020040 (G3DSA:3.90.930.GENE3D); PTHR11655:SF14 (PANTHER); IPR000702 (PANTHER); IPR019906 (HAMAP); IPR020040 (SUPERFAMILY); IPR020040 (SUPERFAMILY)	tr|A8J503|A8J503_CHLRE	Plastid ribosomal protein L6	1e-59	tr|D8TV85|D8TV85_VOLCA	4e-57	scaffold7.g3397.t1	2e-75	scaffold7_size1837125	7e-32
I0YK95_9CHLO	Uncharacterized protein	proline-rich PRCC			IPR018800 (PFAM); PTHR13621 (PANTHER)	tr|A8J8V3|A8J8V3_CHLRE	Predicted protein	5e-18	tr|D8TIG7|D8TIG7_VOLCA	3e-30	scaffold7.g3398.t1	2e-20	scaffold7_size1837125	3e-09
I0YK96_9CHLO	Ribosomal protein 60S	60S acidic ribosomal P2B-like	F:RNA binding; F:structural molecule activity; C:cytosol; C:ribosome; P:translation		PF00428 (PFAM); PTHR21141 (PANTHER); IPR027534 (HAMAP)	tr|A8J0R4|A8J0R4_CHLRE	Acidic ribosomal protein P2	7e-22	tr|D8TVT6|D8TVT6_VOLCA	1e-20	scaffold7.g3393.t1	8e-15
I0YK98_9CHLO	Isy1-like splicing factor	pre-mRNA-splicing factor ISY1 homolog	C:nucleus; C:cytoplasm; F:catalytic activity; P:cellular component organization; P:nucleobase-containing compound metabolic process		IPR009360 (PFAM); IPR009360 (PANTHER); SSF140102 (SUPERFAMILY)	tr|A8IC04|A8IC04_CHLRE	Predicted protein	5e-122	tr|D8U670|D8U670_VOLCA	2e-124	scaffold21.g2085.t1	2e-124	scaffold21_size696144	2e-34
I0YK99_9CHLO	Uncharacterized protein	hypothetical protein COCSUDRAFT_59748	C:membrane		PTHR33825 (PANTHER)	tr|A8I3R5|A8I3R5_CHLRE	Predicted protein	1e-17	tr|D8U1J9|D8U1J9_VOLCA	5e-11	scaffold21.g2084.t1	8e-34	scaffold21_size696144	2e-08
I0YKA7_9CHLO	Uncharacterized protein	auxin efflux carrier family	F:RNA binding; C:membrane; F:transferase activity; P:nucleobase-containing compound metabolic process	EC:2.1.1	IPR003409 (SMART); IPR003409 (PFAM); IPR029026 (G3DSA:3.40.1280.GENE3D); G3DSA:2.20.110.10 (GENE3D); IPR001537 (PFAM); PTHR12029:SF45 (PANTHER); PTHR12029 (PANTHER); IPR029028 (SUPERFAMILY); SSF82185 (SUPERFAMILY)	tr|Q84X80|Q84X80_CHLRE	CR004 protein	2e-37	tr|D8UBH2|D8UBH2_VOLCA	6e-55	scaffold7.g3681.t1	4e-42	scaffold14_size1568905	5e-15
I0YKA8_9CHLO	Stabilizer of iron transporter SufD	iron-sulfur cluster assembly	P:cellular component organization; P:biosynthetic process		IPR000825 (PFAM); IPR011542 (TIGRFAM); PTHR30508 (PANTHER); PTHR30508:SF3 (PANTHER); SSF101960 (SUPERFAMILY)	tr|A8JHB2|A8JHB2_CHLRE	Iron-sulfur cluster assembly protein	4e-139	tr|D8TNQ7|D8TNQ7_VOLCA	5e-125	scaffold1.g5803.t1	1e-98	scaffold1_size3450625	8e-36
I0YKB3_9CHLO	NPL4-domain-containing protein	NPL4 1			IPR024682 (PFAM); G3DSA:3.10.20.90 (GENE3D); IPR007717 (PFAM); PTHR12710 (PANTHER); IPR029071 (SUPERFAMILY)	tr|A8JFM2|A8JFM2_CHLRE	Predicted protein (Fragment)	7e-16	tr|D8UI34|D8UI34_VOLCA	2e-147	scaffold7.g3425.t1	1e-154	scaffold7_size1837125	2e-08
I0YKB5_9CHLO	Ribosomal protein L35Ae	ribosomal L35Ae	F:structural molecule activity; C:cytosol; C:ribosome; P:translation		IPR001780 (PFAM); IPR001780 (PANTHER); IPR001780 (PRODOM); IPR009000 (SUPERFAMILY)	tr|A8I0Y2|A8I0Y2_CHLRE	Ribosomal protein L35a	6e-47	tr|D8TLV8|D8TLV8_VOLCA	5e-49	scaffold7.g3416.t1	8e-48	scaffold7_size1837125	5e-18
I0YKB8_9CHLO	Molybdenum cofactor-binding domain-containing protein	abscisic aldehyde oxidase 3	F:nucleotide binding; F:catalytic activity; P:catabolic process; P:nucleobase-containing compound metabolic process	EC:1.2.3.1	IPR000674 (SMART); IPR008274 (PFAM); IPR000674 (G3DSA:3.90.1170.GENE3D); IPR002888 (G3DSA:1.10.150.GENE3D); IPR002888 (PFAM); IPR005107 (PFAM); IPR000674 (PFAM); IPR008274 (G3DSA:3.30.365.GENE3D); IPR016169 (G3DSA:3.30.465.GENE3D); IPR008274 (G3DSA:3.30.365.GENE3D); G3DSA:3.30.390.50 (GENE3D); IPR008274 (G3DSA:3.30.365.GENE3D); IPR002346 (PFAM); IPR008274 (G3DSA:3.30.365.GENE3D); PTHR11908 (PANTH…	tr|A8IY70|A8IY70_CHLRE	Xanthine dehydrogenase/oxidase (Fragment)	6e-70	tr|D8UEG4|D8UEG4_VOLCA	4e-121	scaffold3.g6651.t1	7e-14
I0YKB9_9CHLO	N-carbamyl-L-amino acid amidohydrolase	N-carbamyl-L-amino acid amidohydrolase	P:catabolic process; P:cellular process; F:hydrolase activity		IPR010158 (PIRSF); IPR011650 (G3DSA:3.30.70.GENE3D); G3DSA:3.40.630.10 (GENE3D); IPR010158 (TIGRFAM); IPR002933 (PFAM); PTHR32494 (PANTHER); PTHR32494:SF5 (PANTHER); IPR011650 (SUPERFAMILY); SSF53187 (SUPERFAMILY)	tr|A8JIN8|A8JIN8_CHLRE	N-carbamyl-L-amino acid amidohydrolase	0	tr|D8TIA2|D8TIA2_VOLCA	5e-153	scaffold12.g8244.t1	1e-70	scaffold12_size2011427	3e-11
I0YKC1_9CHLO	Uncharacterized protein	Fork head transcription factor 1	F:protein binding; F:catalytic activity		IPR000253 (SMART); IPR000253 (G3DSA:2.60.200.GENE3D); IPR000253 (PFAM); PTHR21712:SF35 (PANTHER); PTHR21712 (PANTHER); IPR000253 (PROSITE_PROFILES); IPR008984 (SUPERFAMILY)	tr|A8J9L3|A8J9L3_CHLRE	Predicted protein	3e-12	tr|D8U0T8|D8U0T8_VOLCA	6e-40	scaffold7.g3413.t1	9e-23	scaffold7_size1837125	5e-11
I0YKC2_9CHLO	Anti-silence-domain-containing protein	histone chaperone	C:nucleus; F:protein binding; P:cellular component organization; P:cellular protein modification process		IPR006818 (G3DSA:2.60.40.GENE3D); IPR006818 (PFAM); IPR006818 (PANTHER); IPR006818 (SUPERFAMILY)	tr|A8IZD4|A8IZD4_CHLRE	Anti-silencing factor	1e-68	tr|D8U2U1|D8U2U1_VOLCA	6e-67	scaffold7.g3412.t1	2e-77	scaffold7_size1837125	2e-15
I0YKC4_9CHLO	WD40 repeat-like protein	ROOT INITIATION DEFECTIVE 3	F:protein binding		IPR020472 (PRINTS); IPR001680 (SMART); IPR015943 (G3DSA:2.130.10.GENE3D); IPR001680 (PFAM); PTHR18763 (PANTHER); IPR001680 (PROSITE_PROFILES); IPR017986 (PROSITE_PROFILES); IPR017986 (SUPERFAMILY)	tr|A8HYN6|A8HYN6_CHLRE	Predicted protein	7e-16	tr|D9CJ51|D9CJ51_VOLCA	7e-49	scaffold7.g3431.t1	7e-79	scaffold7_size1837125	2e-16
I0YKC6_9CHLO	Alpha/beta-hydrolase	alpha beta-hydrolase	F:protein binding; P:lipid metabolic process; F:hydrolase activity		IPR000008 (SMART); IPR000008 (PFAM); IPR029058 (G3DSA:3.40.50.GENE3D); IPR002921 (PFAM); IPR000008 (G3DSA:2.60.40.GENE3D); PTHR21493 (PANTHER); IPR000008 (PROSITE_PROFILES); IPR000008 (SUPERFAMILY); IPR029058 (SUPERFAMILY)	tr|D5LAZ6|D5LAZ6_CHLRE	LPS1m	2e-16	tr|D8U5A6|D8U5A6_VOLCA	2e-42	scaffold15.g4348.t1	6e-22	scaffold15_size880018	3e-08
I0YKC9_9CHLO	Uncharacterized protein	transcription initiation factor TFIID subunit 10-like	C:nucleus; P:biosynthetic process; P:nucleobase-containing compound metabolic process		IPR003923 (PRINTS); IPR003923 (PFAM); IPR003923 (PANTHER); PTHR21242:SF0 (PANTHER)	tr|A8J8H6|A8J8H6_CHLRE	Predicted protein	1e-19	tr|D8U7C9|D8U7C9_VOLCA	1e-22	scaffold17.g502.t1	7e-31	scaffold17_size836474	2e-18
I0YKD0_9CHLO	Alpha/beta-hydrolase	ovarian cancer-associated gene 2 homolog	F:hydrolase activity		IPR029058 (G3DSA:3.40.50.GENE3D); IPR005645 (PFAM); PTHR22778 (PANTHER); PTHR22778:SF0 (PANTHER); IPR029058 (SUPERFAMILY)	tr|A8JBQ1|A8JBQ1_CHLRE	Predicted protein	2e-47	tr|D8UJN1|D8UJN1_VOLCA	2e-24	scaffold17.g503.t1	2e-39	scaffold17_size836474	6e-45
I0YKD2_9CHLO	Uncharacterized protein	transport SEC31 homolog B	F:protein binding		IPR001680 (SMART); IPR009917 (PFAM); IPR001680 (PFAM); IPR015943 (G3DSA:2.130.10.GENE3D); PTHR13923:SF11 (PANTHER); PTHR13923 (PANTHER); IPR017986 (PROSITE_PROFILES); IPR001680 (PROSITE_PROFILES); IPR017986 (SUPERFAMILY)	tr|A8J5T5|A8J5T5_CHLRE	COP-II coat subunit	4e-158	tr|D8TN82|D8TN82_VOLCA	2e-89	scaffold7.g3687.t1	9e-50	scaffold7_size1837125	3e-25
I0YKD3_9CHLO	Nucleotide-diphospho-sugar transferase	dolichol-phosphate mannosyltransferase subunit 1	C:nucleus; C:cytoplasm; C:membrane; P:lipid metabolic process; P:cellular protein modification process; C:endoplasmic reticulum; C:Golgi apparatus; P:biosynthetic process; F:transferase activity	EC:2.4.1.109; EC:2.4.1.83; EC:2.4.1	IPR001173 (PFAM); IPR029044 (G3DSA:3.90.550.GENE3D); PTHR10859 (PANTHER); IPR029044 (SUPERFAMILY)	tr|A8J2N5|A8J2N5_CHLRE	Glycosyl transferase	2e-92	tr|D8TUH8|D8TUH8_VOLCA	2e-87	scaffold7.g3688.t1	5e-105	scaffold7_size1837125	3e-28
I0YKD5_9CHLO	Uncharacterized protein	hypothetical protein COCSUDRAFT_59782			PTHR38585 (PANTHER); PTHR38585:SF1 (PANTHER)	tr|A8JAN1|A8JAN1_CHLRE	Predicted protein (Fragment)	1e-24	tr|D8UG01|D8UG01_VOLCA	4e-21	scaffold3.g6755.t1	5e-34	scaffold3_size2545224	2e-31
I0YKD6_9CHLO	Uncharacterized protein	hypothetical protein COCSUDRAFT_68054	C:membrane; F:transporter activity		IPR005821 (PFAM)	tr|F2Z8J6|F2Z8J6_CHLRE	Transient receptor potential channel	8e-43	tr|D8TN37|D8TN37_VOLCA	1e-34	scaffold17.g526.t1	2e-71	scaffold17_size836474	4e-12
I0YKD9_9CHLO	Metallo-dependent phosphatase (Fragment)	purple acid phosphatase 17-like	F:hydrolase activity		IPR029052 (G3DSA:3.60.21.GENE3D); IPR004843 (PFAM); PTHR10161 (PANTHER); IPR029052 (SUPERFAMILY)	tr|A8HXN6|A8HXN6_CHLRE	Predicted protein (Fragment)	3e-17	tr|D9CIW3|D9CIW3_VOLCA	1e-32	scaffold1.g5353.t1	4e-73	scaffold1_size3450625	1e-16
I0YKE0_9CHLO	tRNA uridine 5-carboxymethylaminomethyl modification enzyme	tRNA uridine 5-carboxymethylaminomethyl modification enzyme	F:nucleotide binding; F:catalytic activity; P:nucleobase-containing compound metabolic process		SM01228 (SMART); IPR026904 (PFAM); IPR004416 (TIGRFAM); IPR002218 (PFAM); IPR023753 (G3DSA:3.50.50.GENE3D); IPR010621 (G3DSA:2.60.120.GENE3D); PTHR11806 (PANTHER); PTHR11806:SF4 (PANTHER); IPR004416 (HAMAP); IPR023753 (SUPERFAMILY); SSF160935 (SUPERFAMILY)	tr|A8IBR6|A8IBR6_CHLRE	tRNA uridine 5-carboxymethylaminomethyl modification enzyme (Fragment)	0	tr|D8U600|D8U600_VOLCA	3e-155	scaffold7.g3376.t1	0	scaffold7_size1837125	2e-33
I0YKF0_9CHLO	Short-chain dehydrogenase/reductase SDR	3-oxoacyl-[acyl-carrier- ] reductase -like			IPR002347 (PRINTS); IPR002347 (PRINTS); PF13561 (PFAM); IPR016040 (G3DSA:3.40.50.GENE3D); IPR002347 (PANTHER); IPR016040 (SUPERFAMILY)	tr|A8IWD2|A8IWD2_CHLRE	Predicted protein	8e-26	tr|D8UEW7|D8UEW7_VOLCA	1e-28	scaffold56.g4544.t1	5e-21	scaffold56_size38850	3e-19
I0YKF1_9CHLO	Glutathione synthetase ATP-binding domain-like protein	glutathione synthetase ATP-binding domain	F:nucleotide binding; F:kinase activity		IPR013816 (G3DSA:3.30.470.GENE3D); IPR013815 (G3DSA:3.30.1490.GENE3D); IPR002192 (PFAM); PTHR22931 (PANTHER); PTHR22931:SF1 (PANTHER); SSF56059 (SUPERFAMILY)	tr|A8I6T5|A8I6T5_CHLRE	R1 protein, alpha-glucan water dikinase	2e-136	tr|D8UJU5|D8UJU5_VOLCA	2e-128	scaffold29.g5925.t1	0	scaffold29_size256459	4e-39
I0YKF3_9CHLO	Uncharacterized protein	hypothetical protein COCSUDRAFT_45025	C:membrane		PS51257 (PROSITE_PROFILES)	tr|A8IP29|A8IP29_CHLRE	Predicted protein (Fragment)	1e-31	tr|D8TS76|D8TS76_VOLCA	9e-14	scaffold7.g3689.t1	7e-27	scaffold7_size1837125	2e-14
I0YKF5_9CHLO	RUB1 conjugating enzyme	RUB1-conjugating enzyme E2	F:nucleotide binding; F:protein binding; C:cytoplasm; P:cellular protein modification process; F:transferase activity		SM00212 (SMART); IPR016135 (G3DSA:3.10.110.GENE3D); IPR000608 (PFAM); PTHR24067:SF123 (PANTHER); PTHR24067 (PANTHER); IPR000608 (PROSITE_PROFILES); IPR016135 (SUPERFAMILY)	tr|A8JES7|A8JES7_CHLRE	Predicted protein	3e-84	tr|D8UHF6|D8UHF6_VOLCA	8e-88	scaffold7.g3690.t1	7e-85	scaffold7_size1837125	7e-17
I0YKF7_9CHLO	Uncharacterized protein	hypothetical protein COCSUDRAFT_59803	F:metal ion binding; C:membrane; C:integral component of membrane; P:regulation of transcription, DNA-templated		G3DSA:3.90.1410.10 (GENE3D); PTHR33538 (PANTHER)	tr|A8J208|A8J208_CHLRE	Predicted protein	8e-11	tr|D8UIX1|D8UIX1_VOLCA	3e-15
I0YKG2_9CHLO	Aldose 1-epimerase	galactose mutarotase	P:carbohydrate metabolic process; P:generation of precursor metabolites and energy; F:catalytic activity; P:catabolic process; P:biosynthetic process; F:carbohydrate binding; P:nucleobase-containing compound metabolic process	EC:5.1.3.3	IPR015443 (PIRSF); IPR014718 (G3DSA:2.70.98.GENE3D); IPR008183 (PFAM); PTHR10091 (PANTHER); IPR011013 (SUPERFAMILY)	tr|A8HXA9|A8HXA9_CHLRE	Aldose 1-epimerase	9e-97	tr|D8THZ6|D8THZ6_VOLCA	3e-90	scaffold9.g3017.t1	7e-91	scaffold9_size1652423	4e-13
I0YKG5_9CHLO	Pkinase-domain-containing protein (Fragment)	Pkinase-domain-containing partial	F:nucleotide binding; C:nucleus; F:protein binding; C:cytoplasm; P:signal transduction; P:response to endogenous stimulus; P:cellular protein modification process; F:kinase activity; C:plasma membrane	EC:2.7.11; EC:2.7.11.17	IPR000719 (SMART); IPR002048 (SMART); IPR002048 (PFAM); IPR002048 (PFAM); IPR011992 (G3DSA:1.10.238.GENE3D); G3DSA:1.10.510.10 (GENE3D); G3DSA:3.30.200.20 (GENE3D); IPR000719 (PFAM); PTHR24349:SF84 (PANTHER); PTHR24349 (PANTHER); IPR002048 (PROSITE_PROFILES); IPR000719 (PROSITE_PROFILES); IPR011009 (SUPERFAMILY); IPR011992 (SUPERFAMILY)	tr|A8IZ29|A8IZ29_CHLRE	Predicted protein (Fragment)	8e-160	tr|D8TVN3|D8TVN3_VOLCA	1e-129	scaffold19.g1826.t1	1e-67	scaffold20_size1437327	1e-16
I0YKG6_9CHLO	Ribosomal protein S5 domain 2-like protein	3 exoribonuclease domain 1-containing family	C:nucleus; P:catabolic process; C:ribosome; P:nucleobase-containing compound metabolic process		IPR027408 (G3DSA:3.30.230.GENE3D); IPR015847 (PFAM); IPR001247 (PFAM); PTHR11953 (PANTHER); PTHR11953:SF2 (PANTHER); IPR015847 (SUPERFAMILY); IPR020568 (SUPERFAMILY)	tr|A8J275|A8J275_CHLRE	3'-5' exoribonuclease PH component of the exosome	6e-17	tr|D8TR89|D8TR89_VOLCA	2e-53	scaffold7.g3749.t1	2e-30	scaffold7_size1837125	2e-19
I0YKG7_9CHLO	Uncharacterized protein	transcription factor GTE4	F:protein binding		IPR001487 (SMART); IPR001487 (G3DSA:1.20.920.GENE3D); IPR027353 (PFAM); IPR001487 (PFAM); PTHR22880 (PANTHER); IPR001487 (PROSITE_PROFILES); IPR027353 (PROSITE_PROFILES); IPR001487 (SUPERFAMILY)	tr|A8J429|A8J429_CHLRE	Ring3 protein (Fragment)	2e-31	tr|D8TQQ1|D8TQQ1_VOLCA	5e-37	scaffold1.g5831.t1	2e-52	scaffold1_size3450625	6e-07
I0YKG9_9CHLO	Aminoacyl-histidine dipeptidase	aminoacyl-histidine dipeptidase	P:protein metabolic process; F:hydrolase activity		IPR001160 (PRINTS); IPR001160 (PIRSF); IPR011650 (PFAM); G3DSA:3.40.630.10 (GENE3D); IPR002933 (PFAM); IPR001160 (TIGRFAM); PTHR11014 (PANTHER); PTHR11014:SF54 (PANTHER); SSF53187 (SUPERFAMILY)	tr|A8JB05|A8JB05_CHLRE	Predicted protein	2e-28	tr|D8UC32|D8UC32_VOLCA	5e-138	scaffold7.g3745.t1	3e-150	scaffold7_size1837125	4e-15
I0YKH0_9CHLO	Uncharacterized protein	hypothetical protein COCSUDRAFT_45036	P:biological_process		IPR003728 (PFAM); PTHR34544:SF1 (PANTHER); PTHR34544 (PANTHER); IPR003728 (HAMAP); IPR028989 (SUPERFAMILY)	tr|A8J2H5|A8J2H5_CHLRE	Predicted protein	6e-23	tr|D8TJS4|D8TJS4_VOLCA	2e-38	scaffold25.g5108.t1	2e-31	scaffold25_size399123	2e-07
I0YKH1_9CHLO	Uncharacterized protein	hypothetical protein COCSUDRAFT_20202			PTHR35100:SF1 (PANTHER); PTHR35100 (PANTHER)	tr|A8IEB0|A8IEB0_CHLRE	Predicted protein (Fragment)	2e-48	tr|D8TK38|D8TK38_VOLCA	2e-61	scaffold14.g1292.t1	1e-33
I0YKH4_9CHLO	Uncharacterized protein	N-acetyltransferase 10	F:nucleotide binding; C:membrane; P:biosynthetic process; F:transferase activity; P:nucleobase-containing compound metabolic process	EC:2.3.1	IPR000182 (PFAM); IPR033688 (PTHR10925:PANTHER); IPR032672 (PANTHER)	tr|A8IWF9|A8IWF9_CHLRE	Predicted protein (Fragment)	2e-65	tr|D8UF13|D8UF13_VOLCA	1e-31	scaffold7.g3429.t1	3e-28
I0YKH7_9CHLO	DUF699-domain-containing protein	N-acetyltransferase 10	F:nucleotide binding; C:membrane; P:biosynthetic process; F:transferase activity; P:nucleobase-containing compound metabolic process	EC:2.3.1	IPR013562 (PFAM); IPR007807 (PFAM); IPR027992 (PFAM); IPR000182 (PFAM); IPR032672 (PANTHER); IPR033688 (PTHR10925:PANTHER); IPR033688 (HAMAP)	tr|A8IWF9|A8IWF9_CHLRE	Predicted protein (Fragment)	0	tr|D8UF13|D8UF13_VOLCA	0	scaffold7.g3429.t1	0	scaffold7_size1837125	1e-11
I0YKH8_9CHLO	Uncharacterized protein	probable glycosyltransferase At5g03795	C:membrane; C:integral component of membrane		IPR004263 (PFAM); PTHR11062 (PANTHER); PTHR11062:SF21 (PANTHER)	tr|A8J983|A8J983_CHLRE	Exostosin-like glycosyltransferase	6e-14	tr|D8TRR6|D8TRR6_VOLCA	4e-14
I0YKI0_9CHLO	Mitochondrial carrier protein	mitochondrial adenine nucleotide transporter ADNT1	C:mitochondrion; C:membrane; F:structural molecule activity; C:ribosome; P:transport; P:translation		IPR002067 (PRINTS); IPR018108 (PFAM); IPR023395 (G3DSA:1.50.40.GENE3D); PTHR24089 (PANTHER); PTHR24089:SF325 (PANTHER); IPR018108 (PROSITE_PROFILES); IPR023395 (SUPERFAMILY)	tr|A8IXI7|A8IXI7_CHLRE	Mitochondrial carrier protein	3e-159	tr|D8UGP6|D8UGP6_VOLCA	2e-160	scaffold7.g3371.t1	2e-158	scaffold7_size1837125	4e-34
I0YKI1_9CHLO	Uncharacterized protein	chloroplast-specific ribosomal	C:cytoplasm; P:metabolic process		IPR003489 (PFAM); IPR032528 (PFAM); IPR003489 (G3DSA:3.30.160.GENE3D); IPR003489 (TIGRFAM); PTHR33231 (PANTHER); PTHR33231:SF1 (PANTHER); IPR003489 (SUPERFAMILY)	tr|A8J8B2|A8J8B2_CHLRE	Plastid-specific ribosomal protein 1	5e-61	tr|D8UKP7|D8UKP7_VOLCA	2e-60	scaffold10.g2371.t1	8e-52	scaffold10_size1428175	2e-07
I0YKI2_9CHLO	Uncharacterized protein	helicase-like transcription factor	F:nucleotide binding; F:protein binding		IPR001841 (SMART); IPR014001 (SMART); IPR001650 (SMART); IPR000330 (PFAM); IPR027370 (PFAM); IPR027417 (G3DSA:3.40.50.GENE3D); IPR027417 (G3DSA:3.40.50.GENE3D); IPR027417 (G3DSA:3.40.50.GENE3D); IPR001650 (PFAM); IPR013083 (G3DSA:3.30.40.GENE3D); IPR013083 (G3DSA:3.30.40.GENE3D); IPR001841 (PFAM); PTHR10799:SF721 (PANTHER); PTHR10799 (PANTHER); IPR001650 (PROSITE_PROFILES); IPR001841 (PROSITE_PRO…	tr|A8JBW1|A8JBW1_CHLRE	Predicted protein	3e-170	tr|D8TX23|D8TX23_VOLCA	1e-87	scaffold7.g3475.t1	0	scaffold7_size1837125	1e-18
I0YKI6_9CHLO	Flavo protein	Diflavin flavo A 1	F:nucleotide binding; F:catalytic activity; P:metabolic process		IPR002563 (SMART); IPR001279 (SMART); IPR029039 (G3DSA:3.40.50.GENE3D); IPR002563 (PFAM); IPR001279 (G3DSA:3.60.15.GENE3D); IPR001279 (PFAM); IPR012349 (G3DSA:2.30.110.GENE3D); PTHR32145 (PANTHER); PTHR32145:SF18 (PANTHER); IPR008254 (PROSITE_PROFILES); IPR001279 (SUPERFAMILY); IPR012349 (SUPERFAMILY); IPR029039 (SUPERFAMILY)	tr|A8JBG5|A8JBG5_CHLRE	Flavoprotein	0	tr|D8TRD4|D8TRD4_VOLCA	0	scaffold4.g4579.t1	0	scaffold4_size2474039	1e-16
I0YKI7_9CHLO	Heat shock protein 70	heat shock cognate 70 kDa 2-like	F:nucleotide binding		IPR013126 (PRINTS); IPR013126 (PFAM); IPR029047 (G3DSA:2.60.34.GENE3D); G3DSA:3.90.640.10 (GENE3D); G3DSA:3.30.420.40 (GENE3D); IPR029048 (G3DSA:1.20.1270.GENE3D); G3DSA:3.30.30.30 (GENE3D); G3DSA:3.30.420.40 (GENE3D); PTHR19375 (PANTHER); PTHR19375:SF232 (PANTHER); IPR029047 (SUPERFAMILY); IPR029048 (SUPERFAMILY); SSF53067 (SUPERFAMILY); SSF53067 (SUPERFAMILY)	tr|A8JEU4|A8JEU4_CHLRE	Heat shock protein 70A	0	tr|Q3I5Q5|Q3I5Q5_VOLCA	0	scaffold8.g1581.t1	0	scaffold8_size1730130	5e-73
I0YKI8_9CHLO	Uncharacterized protein	flavin oxidoreductase	F:nucleotide binding; F:catalytic activity; P:metabolic process		IPR002563 (SMART); IPR002563 (PFAM); IPR008254 (PFAM); IPR001279 (G3DSA:3.60.15.GENE3D); IPR029039 (G3DSA:3.40.50.GENE3D); IPR012349 (G3DSA:2.30.110.GENE3D); PTHR32145 (PANTHER); PTHR32145:SF22 (PANTHER); IPR008254 (PROSITE_PROFILES); IPR029039 (SUPERFAMILY); IPR001279 (SUPERFAMILY); IPR012349 (SUPERFAMILY)	tr|A8IVV9|A8IVV9_CHLRE	Flavodoxin-like protein (Fragment)	0	tr|D8TMB0|D8TMB0_VOLCA	3e-167	scaffold4.g4582.t1	0	scaffold4_size2474039	1e-12
I0YKJ1_9CHLO	Sulfurtransferase	rhodanese domain-containing	F:transferase activity	EC:2.8.1.1	IPR001763 (SMART); IPR001763 (G3DSA:3.40.250.GENE3D); IPR001763 (PFAM); IPR001763 (G3DSA:3.40.250.GENE3D); PTHR11364 (PANTHER); PTHR11364:SF13 (PANTHER); IPR001763 (PROSITE_PROFILES); IPR001763 (SUPERFAMILY); IPR001763 (SUPERFAMILY)	tr|A8JB06|A8JB06_CHLRE	Sulfurtransferase	2e-86	tr|D8UC33|D8UC33_VOLCA	4e-43	scaffold13.g171.t1	8e-79	scaffold13_size1291228	2e-21
I0YKJ2_9CHLO	RNA-binding domain-containing protein	zinc finger CCCH domain-containing 25-like	F:nucleotide binding; C:nucleus; F:RNA binding; F:catalytic activity; P:nucleobase-containing compound metabolic process; P:transport		IPR000504 (SMART); IPR000504 (PFAM); IPR012677 (G3DSA:3.30.70.GENE3D); PTHR23139 (PANTHER); IPR000504 (PROSITE_PROFILES); IPR012677 (SUPERFAMILY)	tr|A8J206|A8J206_CHLRE	RNA binding protein	1e-64	tr|D8UIX2|D8UIX2_VOLCA	2e-62	scaffold7.g3588.t1	1e-54	scaffold7_size1837125	1e-20
I0YKJ3_9CHLO	Patatin (Fragment)	patatin-domain-containing partial	P:catabolic process; P:lipid metabolic process; F:hydrolase activity		IPR000595 (SMART); IPR014710 (G3DSA:2.60.120.GENE3D); G3DSA:3.40.1090.10 (GENE3D); IPR014710 (G3DSA:2.60.120.GENE3D); IPR000595 (PFAM); IPR002641 (PFAM); IPR014710 (G3DSA:2.60.120.GENE3D); PTHR14226:SF29 (PANTHER); PTHR14226 (PANTHER); IPR000595 (PROSITE_PROFILES); IPR018490 (SUPERFAMILY); IPR016035 (SUPERFAMILY); IPR018490 (SUPERFAMILY); IPR018490 (SUPERFAMILY)	tr|A8HX98|A8HX98_CHLRE	Patatin	3e-113	tr|D8THZ8|D8THZ8_VOLCA	4e-117
I0YKJ6_9CHLO	tRNA modification GTPase TrmE	tRNA modification GTPase	F:nucleotide binding; F:protein binding; P:nucleobase-containing compound metabolic process; C:intracellular; F:hydrolase activity	EC:3.6.1; EC:3.6.1.15	IPR018948 (PFAM); IPR027266 (G3DSA:3.30.1360.GENE3D); IPR027417 (G3DSA:3.40.50.GENE3D); IPR006073 (PFAM); IPR027368 (G3DSA:1.20.120.GENE3D); IPR004520 (TIGRFAM); IPR025867 (PFAM); IPR005225 (TIGRFAM); PTHR11649:SF63 (PANTHER); PTHR11649 (PANTHER); IPR004520 (HAMAP); IPR027417 (SUPERFAMILY); SSF116878 (SUPERFAMILY)	tr|A8JAA8|A8JAA8_CHLRE	Predicted protein	1e-156	tr|D8U2F3|D8U2F3_VOLCA	2e-143	scaffold6.g2684.t1	3e-110	scaffold6_size1922994	2e-14
I0YKJ8_9CHLO	3-oxoacyl-synth	3-oxoacyl-[acyl-carrier- ] synthase chloroplastic	P:lipid metabolic process; P:biosynthetic process; F:transferase activity; P:cellular process		IPR020841 (SMART); IPR017568 (TIGRFAM); IPR014031 (PFAM); IPR016039 (G3DSA:3.40.47.GENE3D); IPR014030 (PFAM); IPR016039 (G3DSA:3.40.47.GENE3D); PTHR11712 (PANTHER); PTHR11712:SF226 (PANTHER); IPR016039 (SUPERFAMILY); IPR016039 (SUPERFAMILY)	tr|A8JEF7|A8JEF7_CHLRE	3-ketoacyl-CoA-synthase	0	tr|D8UDW0|D8UDW0_VOLCA	0	scaffold11.g4021.t1	0	scaffold3_size2545224	1e-43
I0YKJ9_9CHLO	TPR-like protein	maturation stability factor for petA mRNA	F:protein binding		IPR002885 (PFAM); IPR011990 (G3DSA:1.25.40.GENE3D); IPR033443 (PFAM); IPR002885 (TIGRFAM); IPR002885 (PFAM); PTHR24015 (PANTHER); IPR002885 (PROSITE_PROFILES); IPR011990 (SUPERFAMILY)	tr|Q9AXF7|Q9AXF7_CHLRE	Maturation/stability factor for petA mRNA	2e-123	tr|D8TLP9|D8TLP9_VOLCA	6e-133	scaffold6.g2650.t1	9e-157	scaffold6_size1922994	1e-100
I0YKK0_9CHLO	Flagellar associated protein	hypersensitive-induced response 1	C:cell; C:membrane		IPR001107 (SMART); IPR001107 (PFAM); PTHR10264:SF84 (PANTHER); IPR001972 (PANTHER); IPR001107 (SUPERFAMILY)	tr|A8JAF7|A8JAF7_CHLRE	Flagellar associated protein	7e-114	tr|D8U2E0|D8U2E0_VOLCA	2e-113	scaffold13.g190.t1	3e-139	scaffold13_size1291228	2e-12
I0YKK2_9CHLO	Uncharacterized protein (Fragment)	hypothetical protein COCSUDRAFT_6492, partial	C:membrane		PTHR15852:SF8 (PANTHER); PTHR15852 (PANTHER)	tr|A8J1Y5|A8J1Y5_CHLRE	Predicted protein	2e-90	tr|D8TGT1|D8TGT1_VOLCA	1e-92	scaffold13.g191.t1	1e-89	scaffold13_size1291228	6e-27
I0YKK4_9CHLO	Putative valyl tRNA synthetase	valyl tRNA synthetase	F:nucleotide binding; C:cytosol; P:nucleobase-containing compound metabolic process; F:hydrolase activity; P:translation	EC:6.1.1; EC:6.1.1.9; EC:3.1.1.1	IPR002303 (PRINTS); IPR019499 (PFAM); IPR009080 (G3DSA:1.10.730.GENE3D); IPR014729 (G3DSA:3.40.50.GENE3D); IPR002300 (PFAM); IPR002303 (TIGRFAM); IPR009008 (G3DSA:3.90.740.GENE3D); IPR013155 (PFAM); PTHR11946 (PANTHER); IPR002303 (PTHR11946:PANTHER); IPR002303 (HAMAP); SSF52374 (SUPERFAMILY); IPR009080 (SUPERFAMILY); IPR009008 (SUPERFAMILY)	tr|A8IVG7|A8IVG7_CHLRE	Valyl-tRNA synthetase (Fragment)	0	tr|D8TWM5|D8TWM5_VOLCA	0	scaffold2.g7370.t1	0	scaffold2_size3998120	4e-17
I0YKK5_9CHLO	DNA ligase	ATP-dependent DNA ligase	F:nucleotide binding; C:nucleus; F:DNA binding; F:catalytic activity; C:mitochondrion; P:biosynthetic process; P:DNA metabolic process; P:response to stress	EC:6.5.1; EC:6.5.1.1	G3DSA:3.30.1490.70 (GENE3D); G3DSA:2.40.50.140 (GENE3D); IPR000977 (TIGRFAM); IPR012308 (PFAM); IPR012309 (PFAM); G3DSA:3.30.470.30 (GENE3D); IPR012310 (PFAM); IPR012308 (G3DSA:1.10.3260.GENE3D); PTHR10459:SF10 (PANTHER); PTHR10459 (PANTHER); IPR012310 (PROSITE_PROFILES); IPR012340 (SUPERFAMILY); IPR012308 (SUPERFAMILY); SSF56091 (SUPERFAMILY)	tr|A8JH25|A8JH25_CHLRE	DNA ligase	0	tr|D8U8W1|D8U8W1_VOLCA	0	scaffold13.g181.t1	1e-90	scaffold13_size1291228	7e-17
I0YKK6_9CHLO	Rhomboid-like protein	rhomboid-like protease	P:protein metabolic process; C:membrane; F:hydrolase activity	EC:3.4.21	IPR022764 (G3DSA:1.20.1540.GENE3D); IPR022764 (PFAM); IPR002610 (PANTHER); PTHR22936:SF4 (PANTHER); SSF144091 (SUPERFAMILY)	tr|A8J380|A8J380_CHLRE	Rhomboid-like protein	3e-24	tr|D8TVA4|D8TVA4_VOLCA	2e-33	scaffold5.g606.t1	3e-28	scaffold5_size2028652	5e-23
I0YKK8_9CHLO	Uncharacterized protein	hypothetical protein COCSUDRAFT_49110			IPR014848 (PFAM); PTHR12507 (PANTHER); PTHR12507:SF3 (PANTHER)	tr|A8HXV4|A8HXV4_CHLRE	Predicted protein	9e-19	tr|D9CJ66|D9CJ66_VOLCA	3e-22	scaffold6.g2645.t1	1e-22	scaffold6_size1922994	8e-19
I0YKK9_9CHLO	MFS general substrate transporter	probable sphingolipid transporter spinster homolog 2	C:cytoplasm; C:membrane; P:transport		G3DSA:1.20.1250.20 (GENE3D); G3DSA:1.20.1250.20 (GENE3D); IPR011701 (PFAM); PTHR23505:SF21 (PANTHER); PTHR23505 (PANTHER); IPR020846 (PROSITE_PROFILES); IPR020846 (SUPERFAMILY)	tr|A8INM9|A8INM9_CHLRE	Predicted protein	7e-116	tr|D8TTX4|D8TTX4_VOLCA	3e-124	scaffold13.g167.t1	3e-135	scaffold13_size1291228	5e-35
I0YKL1_9CHLO	Mitochondrial carrier	peroxisomal nicotinamide adenine dinucleotide carrier	C:membrane; P:transport; P:cellular process		IPR023395 (G3DSA:1.50.40.GENE3D); IPR018108 (PFAM); PTHR24089:SF377 (PANTHER); PTHR24089 (PANTHER); IPR018108 (PROSITE_PROFILES); IPR023395 (SUPERFAMILY)	tr|A8IUD0|A8IUD0_CHLRE	Predicted protein (Fragment)	1e-48	tr|D8TZ68|D8TZ68_VOLCA	8e-77	scaffold6.g2640.t1	4e-76	scaffold6_size1922994	2e-06
I0YKL2_9CHLO	Nicotinate-nucleotide pyrophosphorylase [carboxylating]	nicotinate-nucleotide pyrophosphorylase [carboxylating] chloroplastic isoform X1	C:cytoplasm; P:catabolic process; P:biosynthetic process; F:transferase activity; P:nucleobase-containing compound metabolic process	EC:2.4.2.19	IPR027277 (PIRSF); IPR013785 (G3DSA:3.20.20.GENE3D); IPR002638 (PFAM); IPR004393 (TIGRFAM); IPR022412 (PFAM); IPR022412 (G3DSA:3.90.1170.GENE3D); PTHR32179 (PANTHER); IPR002638 (SUPERFAMILY); SSF54675 (SUPERFAMILY)	tr|A8J0N3|A8J0N3_CHLRE	Nicotinate-nucleotide pyrophosphorylase [carboxylating]	6e-107	tr|D8U6Q1|D8U6Q1_VOLCA	1e-108	scaffold6.g2696.t1	1e-120	scaffold6_size1922994	8e-22
I0YKL3_9CHLO	Elongation factor Tu	translation elongation mitochondrial	F:nucleotide binding; C:cell wall; C:mitochondrion; F:translation factor activity, RNA binding; C:ribosome; F:hydrolase activity	EC:3.6.1; EC:3.6.1.15	IPR000795 (PRINTS); G3DSA:2.40.30.10 (GENE3D); IPR004160 (PFAM); G3DSA:2.40.30.10 (GENE3D); IPR005225 (TIGRFAM); IPR004161 (PFAM); PF00009 (PFAM); IPR004541 (TIGRFAM); IPR027417 (G3DSA:3.40.50.GENE3D); PTHR23115 (PANTHER); PTHR23115:SF155 (PANTHER); IPR000795 (PROSITE_PROFILES); IPR004541 (HAMAP); IPR027417 (SUPERFAMILY); IPR009001 (SUPERFAMILY); IPR009000 (SUPERFAMILY)	tr|A8HXR2|A8HXR2_CHLRE	Elongation factor Tu (Fragment)	0	tr|D9CJ50|D9CJ50_VOLCA	0	scaffold6.g2697.t1	0	scaffold41_size205970	1e-157
I0YKL4_9CHLO	alpha-1,2-Mannosidase (Fragment)	mannosyl-oligosaccharide 1,2-alpha-mannosidase MNS1-like	P:carbohydrate metabolic process; C:membrane; F:binding; F:hydrolase activity	EC:3.2.1.113; EC:3.2.1.24; EC:3.2.1	IPR001382 (PRINTS); IPR001382 (G3DSA:1.50.10.GENE3D); IPR001382 (PFAM); PTHR11742 (PANTHER); PTHR11742:SF6 (PANTHER); IPR001382 (SUPERFAMILY)	tr|A8JCH8|A8JCH8_CHLRE	alpha-1,2-Mannosidase	2e-44	tr|D8UG85|D8UG85_VOLCA	2e-71	scaffold11.g3907.t1	5e-123	scaffold20_size1437327	1e-11
I0YKL5_9CHLO	ADP/ATP carrier protein	ADP,ATP carrier chloroplastic-like	F:nucleotide binding; C:membrane; F:transporter activity		IPR004667 (PFAM); IPR004667 (TIGRFAM); PTHR31187:SF3 (PANTHER); IPR004667 (PANTHER); IPR020846 (SUPERFAMILY)	tr|A8JID6|A8JID6_CHLRE	Plastidic ADP/ATP translocase	0	tr|D8TLN9|D8TLN9_VOLCA	0	scaffold27.g6020.t1	0	scaffold27_size312300	1e-62
I0YKL7_9CHLO	Peptidyl-prolyl cis-trans isomerase	peptidyl-prolyl cis-trans isomerase	F:catalytic activity; P:cellular protein modification process	EC:5.2.1.8	IPR002130 (PRINTS); IPR024936 (PIRSF); IPR029000 (G3DSA:2.40.100.GENE3D); IPR002130 (PFAM); IPR024936 (PANTHER); IPR002130 (PROSITE_PROFILES); IPR029000 (SUPERFAMILY)	tr|A8JD64|A8JD64_CHLRE	Peptidyl-prolyl cis-trans isomerase	1e-99	tr|D8U5A4|D8U5A4_VOLCA	3e-96	scaffold6.g2799.t1	1e-78	scaffold3_size2545224	2e-19
I0YKL8_9CHLO	Phophatdylinositol 4-kinase	phosphatidylinositol 4-kinase beta 2-like isoform X1	C:cytoplasm; P:signal transduction; P:lipid metabolic process; F:kinase activity	EC:2.7.1.67	IPR000403 (SMART); IPR000403 (G3DSA:1.10.1070.GENE3D); IPR000403 (PFAM); G3DSA:3.30.1010.10 (GENE3D); IPR015433 (PANTHER); PTHR10048:SF22 (PANTHER); IPR000403 (PROSITE_PROFILES); IPR011009 (SUPERFAMILY)	tr|A8IN76|A8IN76_CHLRE	Smilar to phosphatidylinositol 3-or 4-kinase	3e-153	tr|D8TLS5|D8TLS5_VOLCA	3e-158	scaffold6.g2805.t1	2e-133	scaffold6_size1922994	1e-25
I0YKL9_9CHLO	Cleft lip and palate transmembrane 1	cleft lip and palate transmembrane 1 homolog	C:membrane		IPR008429 (PFAM); PTHR21347:SF0 (PANTHER); IPR008429 (PANTHER)	tr|A8J027|A8J027_CHLRE	Transmembrane protein (Fragment)	0	tr|D8U9A1|D8U9A1_VOLCA	0	scaffold4.g4806.t1	5e-158	scaffold4_size2474039	4e-18
I0YKM0_9CHLO	DNA-directed RNA polymerase	DNA-directed RNA polymerase II subunit RPB2	F:DNA binding; C:cytosol; P:biosynthetic process; F:transferase activity; P:nucleobase-containing compound metabolic process; C:nucleoplasm	EC:2.7.7.6	IPR007642 (PFAM); G3DSA:3.90.1100.10 (GENE3D); IPR007644 (PFAM); IPR007647 (PFAM); IPR007646 (PFAM); IPR014724 (G3DSA:2.40.50.GENE3D); IPR007645 (PFAM); IPR007641 (PFAM); IPR007120 (G3DSA:2.40.270.GENE3D); IPR007120 (PFAM); IPR007642 (G3DSA:3.90.1110.GENE3D); IPR015712 (PANTHER); PTHR20856:SF7 (PANTHER); SSF64484 (SUPERFAMILY)	tr|Q1L5X1|Q1L5X1_CHLRE	DNA-directed RNA polymerase	0	tr|D8TN12|D8TN12_VOLCA	0	scaffold2.g6808.t1	0	scaffold2_size3998120	3e-48
I0YKM1_9CHLO	Uncharacterized protein	peptidase S8	P:protein metabolic process; F:hydrolase activity	EC:3.4.21	IPR015500 (PRINTS); IPR000209 (PFAM); IPR000209 (G3DSA:3.40.50.GENE3D); IPR015500 (PANTHER); PTHR10795:SF419 (PANTHER); IPR000209 (SUPERFAMILY); IPR000209 (SUPERFAMILY)	tr|A8ISA2|A8ISA2_CHLRE	Predicted protein	6e-35	tr|D8TSY6|D8TSY6_VOLCA	4e-27	scaffold10.g2405.t1	3e-35	scaffold19_size774562	2e-08
I0YKM3_9CHLO	Subtilisin-like protein	peptidase S8	P:protein metabolic process; F:hydrolase activity	EC:3.4.21	IPR015500 (PRINTS); IPR000209 (PFAM); IPR000209 (G3DSA:3.40.50.GENE3D); PTHR10795:SF419 (PANTHER); IPR015500 (PANTHER); IPR000209 (SUPERFAMILY)	tr|A8ISA2|A8ISA2_CHLRE	Predicted protein	1e-36	tr|D8TSY6|D8TSY6_VOLCA	9e-31	scaffold12.g8121.t1	2e-48	scaffold8_size1730130	2e-12
I0YKM4_9CHLO	Putative glyoxysomal fatty acid beta-oxidation multifunctional protein	Glyoxysomal fatty acid beta-oxidation multifunctional MFP-a	F:catalytic activity; P:catabolic process; P:lipid metabolic process; P:biosynthetic process; P:cellular process	EC:1.1.1.35	IPR013328 (G3DSA:1.10.1040.GENE3D); IPR001753 (PFAM); IPR016040 (G3DSA:3.40.50.GENE3D); IPR006108 (PFAM); IPR013328 (G3DSA:1.10.1040.GENE3D); IPR029045 (G3DSA:3.90.226.GENE3D); IPR006176 (PFAM); PTHR23309:SF23 (PANTHER); PTHR23309 (PANTHER); IPR008927 (SUPERFAMILY); IPR008927 (SUPERFAMILY); IPR029045 (SUPERFAMILY); IPR016040 (SUPERFAMILY)	tr|A8JBL6|A8JBL6_CHLRE	Predicted protein	0	tr|D8TRG5|D8TRG5_VOLCA	0	scaffold11.g4051.t1	4e-86	scaffold11_size1415723	7e-25
I0YKM7_9CHLO	Uncharacterized protein	hypothetical protein COCSUDRAFT_68096	C:membrane; C:integral component of membrane; F:aminoacyl-tRNA hydrolase activity		IPR003582 (SMART); PTHR31485:SF7 (PANTHER); PTHR31485 (PANTHER)	tr|H3JU05|H3JU05_CHLRE	Peptidyl serine alpha-galactosyltransferase	3e-93	tr|D8UHH7|D8UHH7_VOLCA	4e-75	scaffold1.g5754.t1	1e-82	scaffold14_size1568905	6e-10
I0YKM8_9CHLO	ATP-dependent Clp protease proteolytic subunit	ATP-dependent Clp protease proteolytic subunit partial	P:protein metabolic process; F:hydrolase activity	EC:3.4.21	IPR001907 (PRINTS); IPR029045 (G3DSA:3.90.226.GENE3D); IPR023562 (PFAM); PTHR10381:SF15 (PANTHER); IPR023562 (PANTHER); IPR001907 (HAMAP); IPR029045 (SUPERFAMILY)	tr|A8IS47|A8IS47_CHLRE	ATP-dependent Clp protease proteolytic subunit	3e-66	tr|D8TSX4|D8TSX4_VOLCA	2e-67	scaffold13.g393.t1	1e-123	scaffold41_size205970	7e-56
I0YKM9_9CHLO	Translation initiation factor IF-2	translation initiation factor IF- chloroplastic	F:nucleotide binding; F:translation factor activity, RNA binding; C:ribosome; C:plastid; F:hydrolase activity	EC:3.6.1; EC:3.6.1.15	IPR000795 (PRINTS); IPR023115 (PFAM); PF00009 (PFAM); IPR006847 (PFAM); IPR027417 (G3DSA:3.40.50.GENE3D); IPR005225 (TIGRFAM); G3DSA:2.40.30.10 (GENE3D); IPR023115 (G3DSA:3.40.50.GENE3D); G3DSA:2.40.30.10 (GENE3D); IPR000178 (TIGRFAM); PTHR23115 (PANTHER); PTHR23115:SF138 (PANTHER); IPR000795 (PROSITE_PROFILES); IPR000178 (HAMAP); IPR009000 (SUPERFAMILY); IPR009000 (SUPERFAMILY); IPR027417 (SUPER…	tr|A8ITP1|A8ITP1_CHLRE	Organellar translation initiation factor	6e-122	tr|D8U1M6|D8U1M6_VOLCA	8e-81	scaffold2.g6846.t1	4e-92	scaffold2_size3998120	4e-12
I0YKN1_9CHLO	Defective in cullin neddylation protein	DCN1 2	F:protein binding; P:cellular protein modification process; C:intracellular		G3DSA:1.10.8.10 (GENE3D); IPR005176 (PFAM); PF14555 (PFAM); IPR014764 (PANTHER); IPR005176 (PROSITE_PROFILES); IPR009060 (SUPERFAMILY)	tr|A8HPH8|A8HPH8_CHLRE	Defective in cullin neddylation protein	3e-71	tr|D8TPE8|D8TPE8_VOLCA	4e-49	scaffold4.g4837.t1	4e-76	scaffold4_size2474039	2e-07
I0YKN2_9CHLO	Concanavalin A-like lectin/glucanase	concanavalin A-like lectin glucanase	C:membrane; F:carbohydrate binding		IPR001759 (SMART); PF13385 (PFAM); IPR001759 (PFAM); IPR011936 (TIGRFAM); IPR013320 (G3DSA:2.60.120.GENE3D); IPR011936 (PFAM); PTHR19277 (PANTHER); PTHR19277:SF102 (PANTHER); IPR013320 (SUPERFAMILY); IPR013320 (SUPERFAMILY); IPR013320 (SUPERFAMILY)	tr|A8JH04|A8JH04_CHLRE	Predicted protein (Fragment)	1e-161	tr|D8TGT6|D8TGT6_VOLCA	1e-52	scaffold13.g397.t1	0	scaffold13_size1291228	2e-15
I0YKN4_9CHLO	Uncharacterized protein	agmatine deiminase	P:biosynthetic process; P:cellular process; F:hydrolase activity	EC:3.5.3.12; EC:3.5.3.15	IPR017754 (TIGRFAM); G3DSA:3.75.10.10 (GENE3D); IPR007466 (PFAM); PTHR31377 (PANTHER); PTHR31377:SF0 (PANTHER); SSF55909 (SUPERFAMILY)	tr|A8JD06|A8JD06_CHLRE	Agmatine iminohydrolase	1e-169	tr|D8U565|D8U565_VOLCA	2e-178	scaffold9.g3254.t1	9e-81	scaffold11_size1415723	4e-14
I0YKN5_9CHLO	Uncharacterized protein	dihydrofolate reductase-like			IPR029058 (G3DSA:3.40.50.GENE3D); IPR005645 (PFAM); PTHR22778:SF22 (PANTHER); PTHR22778 (PANTHER); IPR029058 (SUPERFAMILY)	tr|A8J9Y5|A8J9Y5_CHLRE	Predicted protein	8e-23	tr|D8UEE4|D8UEE4_VOLCA	1e-12			scaffold6_size1922994	4e-06
I0YKN8_9CHLO	TBC-domain-containing protein	TBC1 domain family member 2A	C:cell; P:biological_process		IPR000195 (SMART); G3DSA:1.10.8.270 (GENE3D); IPR000195 (PFAM); PTHR22957:SF305 (PANTHER); PTHR22957 (PANTHER); IPR000195 (PROSITE_PROFILES); IPR000195 (SUPERFAMILY); IPR000195 (SUPERFAMILY)	tr|A8JCA4|A8JCA4_CHLRE	RabGAP/TBC protein	5e-108	tr|D8TMW6|D8TMW6_VOLCA	1e-99	scaffold8.g1441.t1	5e-121	scaffold8_size1730130	4e-49
I0YKP0_9CHLO	Uncharacterized protein	hypothetical protein COCSUDRAFT_59885	P:cellular protein modification process; P:biosynthetic process; F:transferase activity		IPR029044 (G3DSA:3.90.550.GENE3D); IPR022751 (PFAM); PTHR31646:SF1 (PANTHER); PTHR31646 (PANTHER); IPR029044 (SUPERFAMILY)	tr|A8IBZ0|A8IBZ0_CHLRE	Predicted protein (Fragment)	9e-44	tr|D8U9M7|D8U9M7_VOLCA	1e-25	scaffold5.g981.t1	8e-26
I0YKP1_9CHLO	AAA-domain-containing protein	ATPase family AAA domain-containing 3-B	F:nucleotide binding		IPR003593 (SMART); IPR027417 (G3DSA:3.40.50.GENE3D); IPR021911 (PFAM); IPR003959 (PFAM); PTHR23075 (PANTHER); PTHR23075:SF0 (PANTHER); IPR027417 (SUPERFAMILY)	tr|A8IR41|A8IR41_CHLRE	26S proteasome regulatory subunit	2e-17	tr|D8U7P9|D8U7P9_VOLCA	0	scaffold13.g415.t1	0	scaffold13_size1291228	6e-17
I0YKP3_9CHLO	PHF5-like protein	PHD finger-like domain-containing 5B	C:nucleus; P:nucleobase-containing compound metabolic process		IPR005345 (PIRSF); IPR005345 (PFAM); IPR005345 (PANTHER)	tr|A8JDZ8|A8JDZ8_CHLRE	Predicted protein	1e-68	tr|D8TW30|D8TW30_VOLCA	4e-70	scaffold2.g7353.t1	6e-73	scaffold2_size3998120	2e-34
I0YKP4_9CHLO	DEAD-domain-containing protein (Fragment)	DEAD-domain-containing partial	F:nucleotide binding; F:RNA binding; C:cytosol; C:nucleolus; P:nucleobase-containing compound metabolic process; F:hydrolase activity	EC:3.6.1; EC:3.6.1.3; EC:2.7.7; EC:3.6.1.15	IPR025313 (SMART); IPR001650 (SMART); IPR014001 (SMART); IPR027417 (G3DSA:3.40.50.GENE3D); IPR011545 (PFAM); IPR001650 (PFAM); IPR027417 (G3DSA:3.40.50.GENE3D); IPR025313 (PFAM); PTHR24031 (PANTHER); PTHR24031:SF54 (PANTHER); IPR001650 (PROSITE_PROFILES); IPR014014 (PROSITE_PROFILES); IPR014001 (PROSITE_PROFILES); IPR027417 (SUPERFAMILY); IPR027417 (SUPERFAMILY)	tr|A8I675|A8I675_CHLRE	Predicted protein (Fragment)	4e-83	tr|D8TUW1|D8TUW1_VOLCA	0	scaffold6.g2616.t1	3e-55	scaffold37_size123908	2e-41
I0YKP7_9CHLO	Adenosylhomocysteinase	S-Adenosyl homocysteine hydrolase	C:cytosol; P:nucleobase-containing compound metabolic process; F:hydrolase activity	EC:3.3.1.1; EC:3.3.1	IPR000043 (SMART); IPR000043 (PIRSF); IPR015878 (SMART); G3DSA:3.40.50.1480 (GENE3D); IPR000043 (TIGRFAM); IPR015878 (PFAM); IPR000043 (PFAM); IPR016040 (G3DSA:3.40.50.GENE3D); G3DSA:3.40.50.1480 (GENE3D); IPR000043 (PANTHER); IPR000043 (HAMAP); SSF52283 (SUPERFAMILY); SSF52283 (SUPERFAMILY); IPR016040 (SUPERFAMILY)	tr|A8IXE0|A8IXE0_CHLRE	Adenosylhomocysteinase	0	tr|D8TV30|D8TV30_VOLCA	0	scaffold13.g189.t1	0	scaffold13_size1291228	8e-32
I0YKQ1_9CHLO	Uncharacterized protein	hypothetical protein COCSUDRAFT_45098	C:membrane; P:transport		IPR020966 (PFAM)	tr|A8J7I7|A8J7I7_CHLRE	Predicted protein	2e-24	tr|D8TUT0|D8TUT0_VOLCA	6e-11
I0YKQ3_9CHLO	Cullin-domain-containing protein	cullin-3A-like isoform X1	F:protein binding; P:catabolic process; P:cellular protein modification process; F:transferase activity; C:intracellular		IPR016158 (SMART); IPR019559 (SMART); G3DSA:4.10.1030.10 (GENE3D); G3DSA:1.20.1310.10 (GENE3D); IPR001373 (PFAM); G3DSA:1.20.1310.10 (GENE3D); IPR019559 (PFAM); IPR011991 (G3DSA:1.10.10.GENE3D); G3DSA:1.20.1310.10 (GENE3D); IPR011991 (G3DSA:1.10.10.GENE3D); G3DSA:1.20.1310.10 (GENE3D); PTHR11932 (PANTHER); PTHR11932:SF86 (PANTHER); IPR016158 (PROSITE_PROFILES); IPR016158 (SUPERFAMILY); IPR011991 …	tr|A8I7H0|A8I7H0_CHLRE	Ubiquitin ligase SCF complex subunit cullin	0	tr|D8U8T8|D8U8T8_VOLCA	0	scaffold13.g390.t1	8e-82	scaffold13_size1291228	8e-17
I0YKQ6_9CHLO	Putative acyltransfersase (Fragment)	N-alpha-acetyltransferase MAK3-like	C:cytoplasm; P:cellular protein modification process; P:biosynthetic process; F:transferase activity	EC:2.3.1.88; EC:2.3.1	IPR000182 (PFAM); IPR016181 (G3DSA:3.40.630.GENE3D); PTHR23091 (PANTHER); PTHR23091:SF66 (PANTHER); IPR000182 (PROSITE_PROFILES); IPR016181 (SUPERFAMILY)	tr|A8IUH9|A8IUH9_CHLRE	Predicted protein (Fragment)	7e-56	tr|D8U166|D8U166_VOLCA	2e-63	scaffold3.g6203.t1	3e-66	scaffold3_size2545224	7e-34
I0YKQ7_9CHLO	Mog1p/PsbP-like protein	psbP domain-containing chloroplastic	C:membrane; P:photosynthesis; F:binding; C:thylakoid		IPR016123 (G3DSA:3.40.1000.GENE3D); IPR002683 (PFAM); PTHR31407:SF14 (PANTHER); PTHR31407 (PANTHER); IPR016123 (SUPERFAMILY)	tr|A8J1Z8|A8J1Z8_CHLRE	PsbP-like protein	1e-33	tr|D8TGU6|D8TGU6_VOLCA	2e-54	scaffold20.g7709.t1	2e-24
I0YKQ8_9CHLO	Uncharacterized protein	cell cycle checkpoint RAD17	F:nucleotide binding; C:nucleus; P:DNA metabolic process; P:response to stress; P:cell cycle		IPR003593 (SMART); IPR027417 (G3DSA:3.40.50.GENE3D); G3DSA:1.10.8.60 (GENE3D); PF03215 (PFAM); IPR027417 (G3DSA:3.40.50.GENE3D); IPR004582 (PANTHER); PTHR12172:SF0 (PANTHER); IPR027417 (SUPERFAMILY)	tr|A8IWS9|A8IWS9_CHLRE	DNA damage checkpoint protein	2e-19	tr|D8UBR5|D8UBR5_VOLCA	7e-54	scaffold13.g359.t1	7e-55	scaffold13_size1291228	2e-14
I0YKR3_9CHLO	Acyl-CoA dehydrogenase domain-containing protein	acyl- dehydrogenase	F:nucleotide binding; F:catalytic activity; P:metabolic process	EC:1.3.99.3	PIRSF016578 (PIRSF); G3DSA:2.40.110.10 (GENE3D); IPR006091 (PFAM); IPR013786 (PFAM); IPR009075 (PFAM); G3DSA:1.20.140.10 (GENE3D); IPR013786 (G3DSA:1.10.540.GENE3D); PTHR10909:SF145 (PANTHER); PTHR10909 (PANTHER); IPR009100 (SUPERFAMILY); IPR009075 (SUPERFAMILY)	tr|A8IPE0|A8IPE0_CHLRE	Predicted protein	1e-59	tr|D8TTY3|D8TTY3_VOLCA	3e-60	scaffold2.g7195.t1	0	scaffold2_size3998120	4e-25
I0YKR4_9CHLO	Kinase-like protein	aurora other	F:nucleotide binding; P:cellular protein modification process; F:kinase activity; C:intracellular	EC:2.7.11	IPR000719 (SMART); G3DSA:1.10.510.10 (GENE3D); G3DSA:3.30.200.20 (GENE3D); IPR000719 (PFAM); PTHR24349 (PANTHER); PTHR24349:SF79 (PANTHER); IPR000719 (PROSITE_PROFILES); IPR011009 (SUPERFAMILY)	tr|A8IEX7|A8IEX7_CHLRE	Predicted protein	1e-75	tr|D8UB99|D8UB99_VOLCA	6e-65	scaffold13.g271.t1	4e-47	scaffold20_size1437327	3e-27
I0YKR7_9CHLO	Glutaredoxin	monothiol glutaredoxin- chloroplastic	C:cell; P:cellular homeostasis; F:catalytic activity; P:metabolic process; F:binding		IPR004480 (TIGRFAM); IPR012336 (G3DSA:3.40.30.GENE3D); IPR002109 (PFAM); PTHR10293:SF37 (PANTHER); IPR004480 (PANTHER); IPR002109 (PROSITE_PROFILES); IPR012336 (SUPERFAMILY)	tr|A8JH05|A8JH05_CHLRE	Glutaredoxin, CGFS type	7e-56	tr|D8U8W7|D8U8W7_VOLCA	7e-53	scaffold16.g35.t1	5e-30	scaffold43_size92162	1e-27
I0YKR8_9CHLO	Putative RNA 3'-terminal phosphate cyclase	RNA 3 -terminal phosphate cyclase	F:RNA binding; F:nuclease activity; C:nucleolus	EC:6.5.1.4; EC:3.1	IPR013791 (PFAM); IPR016443 (TIGRFAM); IPR023797 (PFAM); IPR023797 (G3DSA:3.65.10.GENE3D); PTHR11096:SF1 (PANTHER); IPR000228 (PANTHER); PD397608 (PRODOM); IPR013792 (SUPERFAMILY)	tr|A8J7U7|A8J7U7_CHLRE	RNA terminal 3' phosphate cyclase	1e-166	tr|D8TL03|D8TL03_VOLCA	3e-164	scaffold11.g3908.t1	9e-178	scaffold11_size1415723	2e-71
I0YKS0_9CHLO	Uncharacterized protein	pre-mRNA-splicing regulator WTAP	C:nucleus; P:nucleobase-containing compound metabolic process		IPR029732 (PFAM); PTHR15217 (PANTHER); IPR033757 (PTHR15217:PANTHER)	tr|A8ITZ4|A8ITZ4_CHLRE	Target of FKB12/rapamycin complex (Fragment)	1e-34	tr|D8TZC3|D8TZC3_VOLCA	7e-39	scaffold8.g1621.t1	9e-37
I0YKS3_9CHLO	Heme peroxidase	L-ascorbate peroxidase 6 isoform X1	F:catalytic activity; P:metabolic process; F:binding; P:response to stress; P:cellular process	EC:1.11.1.7	IPR002207 (PRINTS); IPR002016 (PRINTS); G3DSA:1.10.520.10 (GENE3D); G3DSA:1.10.420.10 (GENE3D); IPR002016 (PFAM); PTHR31356 (PANTHER); IPR002016 (PROSITE_PROFILES); IPR010255 (SUPERFAMILY)	tr|A8J285|A8J285_CHLRE	L-ascorbate peroxidase	2e-19	tr|D8U094|D8U094_VOLCA	9e-16
I0YKS4_9CHLO	S-adenosyl-L-methionine-dependent methyltransferase	S-adenosyl-L-methionine-dependent methyltransferase	C:cytoplasm; P:metabolic process; F:transferase activity		IPR013216 (PFAM); IPR029063 (G3DSA:3.40.50.GENE3D); PTHR10108:SF702 (PANTHER); PTHR10108 (PANTHER); IPR029063 (SUPERFAMILY)	tr|A8J054|A8J054_CHLRE	Predicted protein	1e-103	tr|D8U7W0|D8U7W0_VOLCA	6e-124	scaffold2.g7194.t1	1e-56	scaffold2_size3998120	3e-51
I0YKS6_9CHLO	Proteasome subunit beta type	20S proteasome beta subunit type beta 5	C:nucleus; P:protein metabolic process; C:cytoplasm; P:catabolic process; P:cellular process; F:hydrolase activity	EC:3.4.25	IPR000243 (PRINTS); IPR001353 (PFAM); IPR029055 (G3DSA:3.60.20.GENE3D); PTHR11599 (PANTHER); PTHR11599:SF63 (PANTHER); IPR023333 (PROSITE_PROFILES); IPR029055 (SUPERFAMILY)	tr|A8I1A7|A8I1A7_CHLRE	Proteasome subunit beta type	5e-151	tr|D8TUA3|D8TUA3_VOLCA	9e-145	scaffold6.g2713.t1	1e-150	scaffold6_size1922994	1e-36
I0YKS9_9CHLO	Uncharacterized protein	hypothetical protein COCSUDRAFT_20201	P:carbohydrate metabolic process; P:catabolic process; P:lipid metabolic process; F:carbohydrate binding; C:cellular_component; P:cellular process; F:hydrolase activity	EC:3.2.1.23; EC:3.2.1	IPR006101 (PRINTS); IPR004199 (SMART); IPR013781 (G3DSA:3.20.20.GENE3D); IPR013812 (G3DSA:2.60.40.GENE3D); IPR008979 (G3DSA:2.60.120.GENE3D); IPR004199 (PFAM); IPR014718 (G3DSA:2.70.98.GENE3D); IPR013812 (G3DSA:2.60.40.GENE3D); IPR006104 (PFAM); IPR006103 (PFAM); IPR006102 (PFAM); PTHR10066 (PANTHER); PTHR10066:SF72 (PANTHER); IPR008979 (SUPERFAMILY); IPR017853 (SUPERFAMILY); IPR006102 (SUPERFAMI…	tr|A8IZ85|A8IZ85_CHLRE	Predicted protein (Fragment)	3e-173	tr|D8U2U9|D8U2U9_VOLCA	4e-85	scaffold6.g2901.t1	0	scaffold6_size1922994	2e-41
I0YKT0_9CHLO	Thioredoxin-like protein	thioredoxin-related transmembrane 1	C:cell; P:cellular homeostasis; C:membrane		IPR012336 (G3DSA:3.40.30.GENE3D); IPR013766 (PFAM); PTHR18929 (PANTHER); IPR013766 (PROSITE_PROFILES); IPR012336 (SUPERFAMILY)	tr|A8JDF1|A8JDF1_CHLRE	Predicted protein	5e-38	tr|D8TRC4|D8TRC4_VOLCA	5e-35	scaffold6.g2883.t1	1e-35	scaffold3_size2545224	2e-06
I0YKT1_9CHLO	Uncharacterized protein	hypothetical protein COCSUDRAFT_54839	F:DNA binding; F:protein binding		IPR011722 (SMART); IPR011722 (TIGRFAM); IPR011722 (PFAM); IPR001943 (PFAM); PTHR31350 (PANTHER); IPR011722 (SUPERFAMILY)	tr|A8I2Y1|A8I2Y1_CHLRE	Predicted protein	7e-58	tr|D8U3P3|D8U3P3_VOLCA	7e-56	scaffold2.g7314.t1	2e-52	scaffold2_size3998120	1e-10
I0YKT2_9CHLO	Uncharacterized protein	zinc transporter At3g08650	C:membrane; F:transporter activity		PTHR11040:SF68 (PANTHER); PTHR11040 (PANTHER)	tr|A8J232|A8J232_CHLRE	ZIP family transporter	2e-88	tr|D8UIU6|D8UIU6_VOLCA	7e-77	scaffold2.g7316.t1	8e-85	scaffold2_size3998120	5e-11
I0YKT5_9CHLO	Intramembrane metalloprotease	intramembrane metalloprotease	P:protein metabolic process; F:protein binding; C:membrane; F:hydrolase activity	EC:3.4.24	IPR001478 (SMART); IPR008915 (PFAM); IPR001478 (PFAM); IPR001478 (G3DSA:2.30.42.GENE3D); IPR004387 (TIGRFAM); PTHR22939 (PANTHER); PTHR22939:SF97 (PANTHER); IPR001478 (PROSITE_PROFILES); IPR001478 (SUPERFAMILY)	tr|A8J375|A8J375_CHLRE	Intramembrane metalloprotease	2e-123	tr|D8TV05|D8TV05_VOLCA	6e-111	scaffold13.g182.t1	8e-77	scaffold13_size1291228	2e-07
I0YKT6_9CHLO	Uncharacterized protein	Zn-dependent hydrolase			IPR001279 (G3DSA:3.60.15.GENE3D); PF13483 (PFAM); PTHR36142:SF2 (PANTHER); PTHR36142 (PANTHER)	tr|A8II58|A8II58_CHLRE	Predicted protein	4e-48	tr|D8TJ45|D8TJ45_VOLCA	5e-41	scaffold2.g7356.t1	1e-50	scaffold2_size3998120	2e-14
I0YKT9_9CHLO	Uncharacterized protein (Fragment)	probable peptidyl-tRNA hydrolase 2	F:hydrolase activity	EC:3.1.1.29; EC:3.1.1.1	IPR023476 (G3DSA:3.40.1490.GENE3D); IPR002833 (TIGRFAM); IPR002833 (PFAM); PTHR12649 (PANTHER); IPR023476 (SUPERFAMILY)	tr|A8JI10|A8JI10_CHLRE	Peptidyl-trna hydrolase (Fragment)	2e-22	tr|D8UI62|D8UI62_VOLCA	5e-28	scaffold22.g6069.t1	3e-25	scaffold22_size697397	9e-07
I0YKU0_9CHLO	Uncharacterized protein	MOR1 isoform X2	F:binding		SM01349 (SMART); IPR011989 (G3DSA:1.25.10.GENE3D); IPR011989 (G3DSA:1.25.10.GENE3D); PTHR12609:SF0 (PANTHER); PTHR12609 (PANTHER); IPR016024 (SUPERFAMILY); IPR016024 (SUPERFAMILY)	tr|A8J2Q6|A8J2Q6_CHLRE	Microtubule associated protein	0	tr|D8U7I8|D8U7I8_VOLCA	0	scaffold13.g367.t1	2e-159	scaffold13_size1291228	3e-15
I0YKU2_9CHLO	Uncharacterized protein	probable GTP diphosphokinase chloroplastic	P:nucleobase-containing compound metabolic process		IPR007685 (SMART); IPR003607 (PFAM); IPR007685 (PFAM); G3DSA:3.30.460.10 (GENE3D); PTHR21262 (PANTHER); PTHR21262:SF0 (PANTHER); SSF109604 (SUPERFAMILY); SSF81301 (SUPERFAMILY)	tr|Q8LSZ7|Q8LSZ7_CHLRE	Chloroplast ppGpp synthase/degradase	2e-73	tr|D8UJ00|D8UJ00_VOLCA	2e-77	scaffold7.g3694.t1	2e-70	scaffold7_size1837125	2e-09
I0YKU3_9CHLO	Alpha/beta-hydrolase	aminoacrylate hydrolase	F:hydrolase activity		IPR000639 (PRINTS); IPR000073 (PRINTS); IPR029058 (G3DSA:3.40.50.GENE3D); IPR000073 (PFAM); PTHR10992:SF699 (PANTHER); PTHR10992 (PANTHER); IPR029058 (SUPERFAMILY)	tr|A8IA94|A8IA94_CHLRE	Predicted protein (Fragment)	4e-50	tr|D8TYL2|D8TYL2_VOLCA	3e-63
I0YKU4_9CHLO	Uncharacterized protein	GTP diphosphokinase chloroplastic isoform X1	P:response to extracellular stimulus; F:transferase activity; P:nucleobase-containing compound metabolic process; C:plastid; P:response to stress; F:hydrolase activity	EC:3.1; EC:2.7.6.5; EC:3.1.7.2	IPR003607 (SMART); IPR007685 (SMART); IPR003607 (PFAM); G3DSA:3.30.460.10 (GENE3D); IPR007685 (PFAM); IPR004095 (PFAM); G3DSA:3.30.70.260 (GENE3D); IPR012675 (G3DSA:3.10.20.GENE3D); PTHR21262:SF13 (PANTHER); PTHR21262 (PANTHER); SSF109604 (SUPERFAMILY); SSF55021 (SUPERFAMILY); SSF81301 (SUPERFAMILY); IPR012676 (SUPERFAMILY)	tr|Q8LSZ7|Q8LSZ7_CHLRE	Chloroplast ppGpp synthase/degradase	3e-40	tr|D8UJ00|D8UJ00_VOLCA	4e-47	scaffold12.g8298.t1	1e-79	scaffold12_size2011427	1e-27
I0YKU6_9CHLO	UDP-sulfoquinovose synthase	UDP-sulfoquinovose chloroplastic	F:nucleic acid binding; P:lipid metabolic process; P:biosynthetic process; F:transferase activity; P:nucleobase-containing compound metabolic process; C:plastid; F:hydrolase activity	EC:3.13.1.1	IPR016040 (G3DSA:3.40.50.GENE3D); IPR001509 (PFAM); G3DSA:3.90.25.10 (GENE3D); PTHR10366 (PANTHER); PTHR10366:SF337 (PANTHER); IPR016040 (SUPERFAMILY)	tr|Q763T6|Q763T6_CHLRE	UDP-sulfoquinovose synthase	0	tr|D8U7C0|D8U7C0_VOLCA	0	scaffold12.g8243.t1	6e-163	scaffold12_size2011427	6e-18
I0YKU9_9CHLO	Centrin	centrin	F:binding		IPR002048 (SMART); IPR002048 (PFAM); IPR011992 (G3DSA:1.10.238.GENE3D); IPR002048 (PFAM); IPR011992 (G3DSA:1.10.238.GENE3D); PTHR23050 (PANTHER); IPR002048 (PROSITE_PROFILES); IPR011992 (SUPERFAMILY)	tr|A8JC40|A8JC40_CHLRE	Centrin	1e-89	tr|D8UCZ3|D8UCZ3_VOLCA	3e-96	scaffold12.g8280.t1	8e-101	scaffold12_size2011427	4e-35
I0YKV0_9CHLO	Metallo-dependent hydrolase	8-oxoguanine deaminase	P:metabolic process; F:hydrolase activity		G3DSA:3.20.20.140 (GENE3D); IPR006680 (PFAM); IPR011059 (G3DSA:2.30.40.GENE3D); PTHR11271 (PANTHER); PTHR11271:SF37 (PANTHER); IPR032466 (SUPERFAMILY); IPR011059 (SUPERFAMILY)	tr|A8J3T4|A8J3T4_CHLRE	Predicted protein	0	tr|D8TSV8|D8TSV8_VOLCA	7e-140	scaffold2.g7350.t1	5e-161	scaffold2_size3998120	6e-45
I0YKV3_9CHLO	Riboflavin synthase	riboflavin synthase	P:catabolic process; P:cellular component organization; P:cellular protein modification process; F:transferase activity	EC:2.1.1.43; EC:2.1.1	IPR001783 (PIRSF); IPR026017 (PFAM); IPR001783 (TIGRFAM); IPR023366 (G3DSA:2.40.30.GENE3D); PTHR21098:SF4 (PANTHER); IPR001783 (PANTHER); IPR026017 (PROSITE_PROFILES); IPR017938 (SUPERFAMILY); IPR017938 (SUPERFAMILY)	tr|A8IPC9|A8IPC9_CHLRE	Riboflavin synthase	7e-97	tr|D8TS86|D8TS86_VOLCA	2e-92	scaffold2.g7256.t1	2e-77	scaffold2_size3998120	3e-22
I0YKV5_9CHLO	Rhodanese-like protein	rhodanese-related sulfurtransferase	F:transferase activity		IPR001763 (SMART); IPR001763 (PFAM); IPR001763 (G3DSA:3.40.250.GENE3D); PTHR10657:SF12 (PANTHER); PTHR10657 (PANTHER); IPR001763 (PROSITE_PROFILES); IPR001763 (SUPERFAMILY)	tr|A8IU62|A8IU62_CHLRE	Peptidyl-prolyl cis-trans isomerase, parvulin-type	3e-36	tr|D8TVK0|D8TVK0_VOLCA	6e-36	scaffold2.g7001.t1	1e-42	scaffold2_size3998120	2e-18
I0YKV8_9CHLO	General substrate transporter	general substrate transporter	C:plasma membrane; F:transporter activity		IPR003663 (PRINTS); IPR003663 (TIGRFAM); G3DSA:1.20.1250.20 (GENE3D); IPR005828 (PFAM); PTHR23500:SF47 (PANTHER); PTHR23500 (PANTHER); IPR020846 (PROSITE_PROFILES); IPR020846 (SUPERFAMILY)	tr|A8IX73|A8IX73_CHLRE	Hexose transporter	1e-20	tr|D8TV55|D8TV55_VOLCA	3e-24	scaffold4.g4783.t1	2e-108	scaffold16_size857609	7e-08
I0YKV9_9CHLO	P-loop containing nucleoside triphosphate hydrolase protein	ABC transporter I family member chloroplastic	F:nucleotide binding; C:plastid; F:hydrolase activity	EC:3.6.1; EC:3.6.1.3; EC:3.6.1.15	IPR003593 (SMART); IPR027417 (G3DSA:3.40.50.GENE3D); IPR003439 (PFAM); PTHR24220 (PANTHER); IPR003439 (PROSITE_PROFILES); IPR027417 (SUPERFAMILY)	tr|A8IFM3|A8IFM3_CHLRE	Predicted protein (Fragment)	4e-81	tr|D8TZ16|D8TZ16_VOLCA	1e-86	scaffold2.g6944.t1	1e-55	scaffold42_size96234	4e-19
I0YKW0_9CHLO	Sumo-1 in complex with A sumo-binding motif-containing protein	small ubiquitin-related modifier 1	F:protein binding		IPR022617 (PFAM); G3DSA:3.10.20.90 (GENE3D); PTHR10562 (PANTHER); IPR000626 (PROSITE_PROFILES); IPR029071 (SUPERFAMILY)	tr|A8J3A8|A8J3A8_CHLRE	Small ubiquitin-related modifier	7e-19	tr|D8U2G3|D8U2G3_VOLCA	8e-21	scaffold6.g2709.t1	3e-18	scaffold2_size3998120	3e-08
I0YKW3_9CHLO	S-acyltransferase	probable S-acyltransferase 16	C:membrane; P:biosynthetic process; F:binding; F:transferase activity; P:cellular process	EC:2.3.1.225; EC:2.3.1	IPR001594 (PFAM); PTHR22883:SF92 (PANTHER); PTHR22883 (PANTHER); IPR001594 (PROSITE_PROFILES)	tr|A8JIP5|A8JIP5_CHLRE	S-acyltransferase (Fragment)	7e-55	tr|D8TI58|D8TI58_VOLCA	3e-67	scaffold8.g1586.t1	1e-26
I0YKW4_9CHLO	Uncharacterized protein	hypothetical protein COCSUDRAFT_67942	C:membrane		PTHR34116 (PANTHER)	tr|A8I7V6|A8I7V6_CHLRE	Predicted protein	1e-27	tr|D8U4Q4|D8U4Q4_VOLCA	1e-26	scaffold12.g8264.t1	9e-26
I0YKW7_9CHLO	Amidase signature enzyme	amidase signature enzyme	F:catalytic activity; F:binding		IPR023631 (PFAM); IPR023631 (G3DSA:3.90.1300.GENE3D); IPR000120 (PANTHER); IPR032710 (SUPERFAMILY); IPR023631 (SUPERFAMILY)	tr|A8IIN4|A8IIN4_CHLRE	Glutamyl-tRNA(Gln) amidotransferase subunit A, chloroplastic/mitochondrial	6e-28	tr|D8U537|D8U537_VOLCA	4e-33	scaffold1.g5475.t1	2e-132	scaffold4_size2474039	2e-24
I0YKX0_9CHLO	Uncharacterized protein	hypothetical protein COCSUDRAFT_67944	C:chloroplast stroma; C:chloroplast; P:response to stress		PTHR36081 (PANTHER); PTHR36081:SF1 (PANTHER)	tr|A8JHK1|A8JHK1_CHLRE	Predicted protein of CLR family (Fragment)	2e-16	tr|D8UA94|D8UA94_VOLCA	2e-31	scaffold20.g7638.t1	8e-25	scaffold20_size1437327	4e-12
I0YKX1_9CHLO	Mitogen-activated protein kinase 7	mitogen-activated kinase 7	F:nucleotide binding; P:cellular protein modification process; C:cytosol; P:biosynthetic process; F:kinase activity	EC:2.7.11; EC:4.1.3.27	IPR000719 (SMART); IPR000719 (PFAM); G3DSA:1.10.510.10 (GENE3D); G3DSA:3.30.200.20 (GENE3D); PTHR24055:SF184 (PANTHER); PTHR24055 (PANTHER); IPR000719 (PROSITE_PROFILES); IPR011009 (SUPERFAMILY)	tr|A8J8P5|A8J8P5_CHLRE	Mitogen-activated protein kinase 7 (Fragment)	6e-171	tr|D8TTN1|D8TTN1_VOLCA	6e-167	scaffold2.g6950.t1	1e-156	scaffold2_size3998120	4e-28
I0YKX5_9CHLO	NAD(P)-binding protein	Peroxisomal 2,4-dienoyl- reductase	C:membrane		IPR002347 (PRINTS); IPR002347 (PRINTS); SM00822 (SMART); PF13561 (PFAM); IPR016040 (G3DSA:3.40.50.GENE3D); IPR002347 (PANTHER); PTHR24322:SF427 (PANTHER); IPR016040 (SUPERFAMILY)	tr|A8JFE5|A8JFE5_CHLRE	Predicted protein	2e-123	tr|D8UD74|D8UD74_VOLCA	2e-127	scaffold2.g6952.t1	2e-53	scaffold2_size3998120	4e-18
I0YKX6_9CHLO	Chlorophyll a/b-binding protein	chlorophyll a b-binding	P:generation of precursor metabolites and energy; C:membrane; P:cellular protein modification process; P:photosynthesis; F:binding; C:plastid; C:thylakoid		IPR022796 (PFAM); IPR023329 (G3DSA:1.10.3460.GENE3D); IPR001344 (PANTHER); SSF103511 (SUPERFAMILY)	tr|A8IKC8|A8IKC8_CHLRE	Light-harvesting protein of photosystem I	3e-24	tr|D8TP48|D8TP48_VOLCA	3e-23	scaffold16.g31.t1	2e-23	scaffold16_size857609	2e-12
I0YKX7_9CHLO	Uncharacterized protein	ring-hydroxylating dioxygenase	F:catalytic activity; C:membrane; P:metabolic process; F:binding	EC:1.13.12; EC:1.14.13.122	IPR013626 (PFAM); IPR023329 (G3DSA:1.10.3460.GENE3D); IPR017941 (PFAM); IPR022796 (PFAM); IPR017941 (G3DSA:2.102.10.GENE3D); PTHR21266:SF25 (PANTHER); PTHR21266 (PANTHER); IPR017941 (PROSITE_PROFILES); SSF103511 (SUPERFAMILY); IPR017941 (SUPERFAMILY); SSF55961 (SUPERFAMILY)	tr|A8J6L3|A8J6L3_CHLRE	Pheophorbide a oxygenase	1e-68	tr|D8TQK1|D8TQK1_VOLCA	8e-51	scaffold2.g7093.t1	3e-55	scaffold318_size2899	1e-14
I0YKX8_9CHLO	S-adenosyl-L-methionine-dependent methyltransferase (Fragment)	S-adenosyl-L-methionine-dependent partial	C:cytoplasm; P:metabolic process; F:transferase activity		IPR013216 (PFAM); IPR029063 (G3DSA:3.40.50.GENE3D); PTHR10108 (PANTHER); PTHR10108:SF788 (PANTHER); IPR029063 (SUPERFAMILY)	tr|A8IYB8|A8IYB8_CHLRE	Methyltransferase	2e-109	tr|D8UCG0|D8UCG0_VOLCA	3e-112	scaffold9.g3185.t1	5e-46	scaffold9_size1652423	5e-07
I0YKX9_9CHLO	MFS general substrate transporter	probable sphingolipid transporter spinster homolog 2	C:membrane; P:transport		IPR011701 (PFAM); G3DSA:1.20.1250.20 (GENE3D); G3DSA:1.20.1250.20 (GENE3D); PTHR23505 (PANTHER); PTHR23505:SF21 (PANTHER); IPR020846 (PROSITE_PROFILES); IPR020846 (SUPERFAMILY)	tr|A8INM9|A8INM9_CHLRE	Predicted protein	4e-93	tr|D8TTX4|D8TTX4_VOLCA	7e-96	scaffold13.g167.t1	1e-93	scaffold13_size1291228	4e-26
I0YKY0_9CHLO	tRNA-dihydrouridine(47) synthase [NAD(P)(+)]	tRNA-dihydrouridine(47) synthase [NAD(P)(+)]-like	F:nucleotide binding; F:catalytic activity; P:nucleobase-containing compound metabolic process		IPR000571 (G3DSA:4.10.1000.GENE3D); IPR013785 (G3DSA:3.20.20.GENE3D); IPR001269 (PFAM); IPR001269 (PANTHER); PTHR11082:SF8 (PANTHER); IPR000571 (PROSITE_PROFILES); SSF51395 (SUPERFAMILY)	tr|A8ICF9|A8ICF9_CHLRE	Predicted protein (Fragment)	3e-34	tr|D8TZX2|D8TZX2_VOLCA	1e-169	scaffold2.g6956.t1	8e-165	scaffold37_size123908	5e-20
I0YKY1_9CHLO	DUF924-domain-containing protein	DUF924-domain-containing protein	F:protein binding		G3DSA:1.20.58.320 (GENE3D); IPR010323 (PFAM); IPR011990 (G3DSA:1.25.40.GENE3D); PTHR23004 (PANTHER); PTHR23004:SF7 (PANTHER); IPR011990 (SUPERFAMILY)	tr|A8IHB6|A8IHB6_CHLRE	Predicted protein	5e-40	tr|D8UE20|D8UE20_VOLCA	6e-16	scaffold8.g1464.t1	2e-39
I0YKY3_9CHLO	Uncharacterized protein	brefeldin A-inhibited guanine nucleotide-exchange 5	P:signal transduction; F:binding		IPR000904 (SMART); IPR015403 (PFAM); IPR000904 (PFAM); IPR032691 (PFAM); G3DSA:1.10.220.20 (GENE3D); IPR011989 (G3DSA:1.25.10.GENE3D); IPR023394 (G3DSA:1.10.1000.GENE3D); IPR032629 (PFAM); PTHR10663 (PANTHER); PTHR10663:SF189 (PANTHER); IPR000904 (PROSITE_PROFILES); IPR016024 (SUPERFAMILY); IPR000904 (SUPERFAMILY)	tr|A8IEI2|A8IEI2_CHLRE	SEC7/BIG-like ARF-GEF	5e-52	tr|D8TK76|D8TK76_VOLCA	6e-54	scaffold2.g6944.t1	2e-54	scaffold2_size3998120	5e-12
I0YKY9_9CHLO	Uncharacterized protein	glycoside hydrolase	P:carbohydrate metabolic process; F:hydrolase activity		IPR029058 (G3DSA:3.40.50.GENE3D); IPR008979 (G3DSA:2.60.120.GENE3D); IPR006104 (PFAM); IPR013781 (G3DSA:3.20.20.GENE3D); IPR013812 (G3DSA:2.60.40.GENE3D); IPR006102 (PFAM); PTHR10066 (PANTHER); PTHR10066:SF44 (PANTHER); IPR029058 (SUPERFAMILY); IPR006102 (SUPERFAMILY); IPR017853 (SUPERFAMILY); IPR008979 (SUPERFAMILY)	tr|A8J960|A8J960_CHLRE	Predicted protein	3e-50	tr|D8THR7|D8THR7_VOLCA	8e-54	scaffold2.g6932.t1	6e-28	scaffold1_size3450625	1e-06
I0YKZ0_9CHLO	Uncharacterized protein	COP9 signalosome complex subunit 7-like isoform X1	F:protein binding		IPR000717 (SMART); SM00753 (SMART); PTHR15350 (PANTHER)	tr|A8J9F7|A8J9F7_CHLRE	Predicted protein	2e-66	tr|D8U0K6|D8U0K6_VOLCA	2e-67	scaffold1.g5621.t1	2e-45	scaffold1_size3450625	1e-20
I0YKZ1_9CHLO	Cytochrome P450	cytochrome P450	F:nucleotide binding; C:membrane; P:cellular protein modification process; F:kinase activity		IPR001128 (PRINTS); IPR002401 (PRINTS); IPR001128 (PFAM); IPR001128 (G3DSA:1.10.630.GENE3D); PTHR24305 (PANTHER); IPR001128 (SUPERFAMILY)	tr|A8IG04|A8IG04_CHLRE	Cytochrome P450	2e-39	tr|D8UBI0|D8UBI0_VOLCA	9e-42	scaffold1.g5422.t1	2e-75
I0YKZ2_9CHLO	Cytochrome P450	cytochrome P450	F:nucleotide binding; C:membrane; P:cellular protein modification process; F:kinase activity		IPR002401 (PRINTS); IPR000719 (SMART); IPR001245 (PFAM); IPR001128 (PFAM); IPR001128 (G3DSA:1.10.630.GENE3D); G3DSA:1.10.510.10 (GENE3D); G3DSA:3.30.200.20 (GENE3D); PTHR23257 (PANTHER); IPR000719 (PROSITE_PROFILES); IPR011009 (SUPERFAMILY); IPR001128 (SUPERFAMILY)	tr|A8J8L4|A8J8L4_CHLRE	Predicted protein (Fragment)	4e-42	tr|D8UBI0|D8UBI0_VOLCA	9e-45	scaffold4.g5023.t1	1e-64	scaffold4_size2474039	5e-11
I0YKZ3_9CHLO	Vacuolar ATP synthase, subunit A	vacuolar ATP subunit A	P:generation of precursor metabolites and energy; C:Golgi apparatus; C:extracellular region; C:vacuole; P:nucleobase-containing compound metabolic process; C:plasma membrane; C:plastid; F:transporter activity; F:nucleotide binding; F:protein binding; C:cell wall; P:cellular component organization; F:hydrolase activity	EC:3.6.1; EC:3.6.1.3; EC:3.6.1.15	IPR027417 (G3DSA:3.40.50.GENE3D); IPR024034 (G3DSA:1.10.1140.GENE3D); IPR000194 (PFAM); IPR005725 (TIGRFAM); IPR031686 (PFAM); IPR004100 (PFAM); PTHR15184 (PANTHER); PTHR15184:SF7 (PANTHER); IPR022878 (HAMAP); IPR027417 (SUPERFAMILY); IPR000793 (SUPERFAMILY); IPR004100 (SUPERFAMILY)	tr|A8I164|A8I164_CHLRE	Vacuolar ATP synthase, subunit A	0	tr|D8TUD2|D8TUD2_VOLCA	0	scaffold12.g8165.t1	0	scaffold12_size2011427	4e-37
I0YKZ5_9CHLO	Uncharacterized protein	FFD and TFG box motifscontaining			IPR019050 (SMART); IPR025609 (SMART); IPR025609 (PFAM); PTHR13586:SF0 (PANTHER); PTHR13586 (PANTHER); IPR025762 (PROSITE_PROFILES); IPR025768 (PROSITE_PROFILES); IPR010920 (SUPERFAMILY)	tr|A8IZA8|A8IZA8_CHLRE	Predicted protein (Fragment)	4e-22	tr|D8U2R4|D8U2R4_VOLCA	8e-26	scaffold12.g8213.t1	8e-20
I0YL00_9CHLO	Kinesin-like protein	Kif12 type kinesin	F:nucleotide binding; C:cytoskeleton; F:protein binding; P:cellular process; F:motor activity	EC:3.6.1; EC:3.6.1.15	IPR001752 (PRINTS); IPR001752 (SMART); IPR001752 (PFAM); IPR001752 (G3DSA:3.40.850.GENE3D); IPR027640 (PANTHER); IPR001752 (PROSITE_PROFILES); IPR027417 (SUPERFAMILY)	tr|A8JI66|A8JI66_CHLRE	Kinesin-like protein	8e-99	tr|D8TVX6|D8TVX6_VOLCA	8e-113	scaffold3.g6286.t1	7e-51	scaffold2_size3998120	2e-26
I0YL01_9CHLO	Uncharacterized protein	fatty acid synthase	C:membrane; P:metabolic process; F:transferase activity; F:binding		SM00822 (SMART); IPR020806 (SMART); IPR020841 (SMART); IPR020801 (SMART); IPR020807 (SMART); IPR020843 (SMART); IPR001227 (G3DSA:3.40.366.GENE3D); IPR029063 (G3DSA:3.40.50.GENE3D); IPR014043 (PFAM); IPR009081 (G3DSA:1.10.1200.GENE3D); PF13489 (PFAM); IPR009081 (PFAM); IPR016039 (G3DSA:3.40.47.GENE3D); IPR032821 (PFAM); IPR016040 (G3DSA:3.40.50.GENE3D); IPR013968 (PFAM); G3DSA:2.160.10.10 (GENE3D)…	tr|A8HZR1|A8HZR1_CHLRE	Type I polyketide synthase	7e-36	tr|D8TZK2|D8TZK2_VOLCA	3e-43	scaffold31.g3799.t1	1e-80	scaffold31_size197302	2e-70
I0YL02_9CHLO	Kinase-like protein	sulfur stress regulator	F:nucleotide binding; P:cellular protein modification process; F:kinase activity		IPR000719 (SMART); IPR000719 (PFAM); G3DSA:3.30.200.20 (GENE3D); G3DSA:1.10.510.10 (GENE3D); PTHR24343 (PANTHER); IPR000719 (PROSITE_PROFILES); IPR011009 (SUPERFAMILY)	tr|Q9ZSM9|Q9ZSM9_CHLRE	Snf1-like protein kinase	5e-44	tr|D8TNP5|D8TNP5_VOLCA	3e-45	scaffold13.g352.t1	7e-36	scaffold1_size3450625	4e-14
I0YL04_9CHLO	Histone H2A (Fragment)	histone H2A	C:nucleus; F:DNA binding; F:protein binding		IPR002119 (PRINTS); IPR002119 (SMART); IPR007125 (PFAM); IPR009072 (G3DSA:1.10.20.GENE3D); IPR032454 (PFAM); PTHR23430 (PANTHER); IPR009072 (SUPERFAMILY)	tr|A8HWF6|A8HWF6_CHLRE	Histone H2A	2e-70	tr|D8TSQ5|D8TSQ5_VOLCA	9e-72	scaffold14.g1245.t1	2e-73	scaffold7_size1837125	3e-40
I0YL05_9CHLO	NAD(P)-binding protein	short-chain dehydrogenase			IPR002347 (PRINTS); IPR016040 (G3DSA:3.40.50.GENE3D); IPR002347 (PFAM); PTHR24320:SF72 (PANTHER); PTHR24320 (PANTHER); IPR016040 (SUPERFAMILY)	tr|A8ISA5|A8ISA5_CHLRE	Predicted protein	1e-82	tr|D8TSY1|D8TSY1_VOLCA	2e-88	scaffold2.g6924.t1	5e-42	scaffold3_size2545224	3e-06
I0YL06_9CHLO	UDP-glucose 4-epimerase	UDP-glucose 4-epimerase	P:carbohydrate metabolic process; F:catalytic activity; P:nucleobase-containing compound metabolic process	EC:5.1.3.2	IPR005886 (TIGRFAM); IPR016040 (G3DSA:3.40.50.GENE3D); G3DSA:3.90.25.10 (GENE3D); IPR016040 (PFAM); PTHR10366 (PANTHER); PTHR10366:SF308 (PANTHER); IPR016040 (SUPERFAMILY)	tr|A8J9S9|A8J9S9_CHLRE	UDP-glucose 4-epimerase	0	tr|D8UFR2|D8UFR2_VOLCA	2e-168	scaffold8.g1393.t1	6e-50	scaffold8_size1730130	6e-17
I0YL07_9CHLO	Kinesin-like protein	kinesin KIN-13A	F:nucleotide binding; C:cytoskeleton; F:protein binding; P:cellular process; F:motor activity	EC:3.6.1; EC:3.6.1.3; EC:3.6.1.15	IPR001752 (PRINTS); IPR001752 (SMART); IPR001752 (PFAM); IPR001752 (G3DSA:3.40.850.GENE3D); IPR027640 (PANTHER); PTHR24115:SF410 (PANTHER); IPR001752 (PROSITE_PROFILES); IPR027417 (SUPERFAMILY)	tr|A8J1B4|A8J1B4_CHLRE	Kinesin-like protein (Fragment)	4e-128	tr|D8TL96|D8TL96_VOLCA	7e-139	scaffold11.g4075.t1	5e-143	scaffold11_size1415723	1e-28
I0YL08_9CHLO	RabGAP/TBC protein	GTPase-activating gyp1	F:protein binding; P:cellular component organization; F:enzyme regulator activity; P:transport; C:intracellular		IPR000195 (SMART); IPR000195 (PFAM); G3DSA:1.10.8.270 (GENE3D); PTHR22957:SF26 (PANTHER); PTHR22957 (PANTHER); IPR000195 (PROSITE_PROFILES); IPR000195 (SUPERFAMILY); IPR000195 (SUPERFAMILY)	tr|A8IL38|A8IL38_CHLRE	RabGAP/TBC protein	2e-138	tr|D8TPC7|D8TPC7_VOLCA	3e-146	scaffold2.g6931.t1	7e-133	scaffold2_size3998120	1e-17
I0YL10_9CHLO	Uncharacterized protein	probable ubiquitin-conjugating enzyme E2 23			SM00212 (SMART); IPR000608 (PFAM); IPR016135 (G3DSA:3.10.110.GENE3D); PTHR24067 (PANTHER); PTHR24067:SF150 (PANTHER); IPR000608 (PROSITE_PROFILES); IPR016135 (SUPERFAMILY)	tr|A8IKM3|A8IKM3_CHLRE	Ubiquitin conjugating enzyme family protein	7e-28	tr|D8TP82|D8TP82_VOLCA	3e-25	scaffold27.g5986.t1	7e-28	scaffold27_size312300	5e-08
I0YL13_9CHLO	S-syntaxin-like protein	syntaxin-132-like isoform X2	F:protein binding; C:membrane; P:cellular component organization; P:transport; C:intracellular		IPR006011 (SMART); IPR000727 (SMART); G3DSA:1.20.58.70 (GENE3D); IPR006011 (PFAM); G3DSA:1.20.5.110 (GENE3D); IPR000727 (PFAM); PTHR19957 (PANTHER); PTHR19957:SF80 (PANTHER); IPR000727 (PROSITE_PROFILES); IPR010989 (SUPERFAMILY)	tr|A8HUY7|A8HUY7_CHLRE	Qa-SNARE Sso1/Syntaxin1, PM-type	6e-93	tr|D8TQR6|D8TQR6_VOLCA	5e-95	scaffold2.g6954.t1	2e-94	scaffold2_size3998120	5e-10
I0YL15_9CHLO	Pyruvate dehydrogenase E1 component subunit alpha	pyruvate dehydrogenase E1 component subunit alpha- chloroplastic-like	P:carbohydrate metabolic process; P:generation of precursor metabolites and energy; F:catalytic activity; P:catabolic process; C:cytoplasm; P:biosynthetic process; P:nucleobase-containing compound metabolic process	EC:1.2.4.1	IPR001017 (PFAM); IPR029061 (G3DSA:3.40.50.GENE3D); IPR017597 (TIGRFAM); PTHR11516 (PANTHER); PTHR11516:SF25 (PANTHER); IPR029061 (SUPERFAMILY)	tr|A8IYT7|A8IYT7_CHLRE	Mitochondrial branched-chain alpha-ketoacid dehydrogenase complex, E1 alpha (Fragment)	2e-25	tr|D8TW10|D8TW10_VOLCA	0	scaffold2.g6925.t1	0	scaffold2_size3998120	7e-16
I0YL16_9CHLO	ATP-NAD kinase	NAD kinase-like isoform X6	P:biosynthetic process; F:kinase activity; P:nucleobase-containing compound metabolic process	EC:2.7.1.23	IPR017438 (G3DSA:3.40.50.GENE3D); IPR017437 (G3DSA:2.60.200.GENE3D); IPR002504 (PFAM); IPR002504 (PANTHER); PTHR20275:SF0 (PANTHER); IPR002504 (HAMAP); IPR016064 (SUPERFAMILY)	tr|A8IB90|A8IB90_CHLRE	Predicted protein	5e-142	tr|D8TUE1|D8TUE1_VOLCA	9e-137	scaffold2.g6919.t1	2e-87	scaffold26_size333660	7e-15
I0YL17_9CHLO	P-loop containing nucleoside triphosphate hydrolase protein (Fragment)	ATP-dependent RNA helicase DHX36 isoform X2	F:nucleic acid binding; F:nucleotide binding; F:hydrolase activity	EC:3.6.1; EC:3.6.1.3; EC:3.6.1.15	IPR001650 (SMART); IPR007502 (SMART); IPR014001 (SMART); IPR027417 (G3DSA:3.40.50.GENE3D); IPR007502 (PFAM); IPR011709 (PFAM); IPR011545 (PFAM); IPR001650 (PFAM); IPR027417 (G3DSA:3.40.50.GENE3D); PTHR18934 (PANTHER); PTHR18934:SF145 (PANTHER); IPR014001 (PROSITE_PROFILES); IPR001650 (PROSITE_PROFILES); IPR027417 (SUPERFAMILY)	tr|A8HNH3|A8HNH3_CHLRE	Predicted protein (Fragment)	3e-71	tr|D8TIM8|D8TIM8_VOLCA	0	scaffold1.g5373.t1	2e-172	scaffold1_size3450625	3e-30
I0YL18_9CHLO	Uncharacterized protein	transmembrane of CMA family	C:membrane		no IPS match	tr|A8ISB6|A8ISB6_CHLRE	Transmembrane protein of CMA family	1e-22	tr|D8U344|D8U344_VOLCA	2e-19	scaffold3.g6402.t1	3e-17
I0YL19_9CHLO	Uncharacterized protein	hypothetical protein COCSUDRAFT_44868	F:protein binding		IPR001680 (SMART); IPR015943 (G3DSA:2.130.10.GENE3D); IPR017986 (SUPERFAMILY)	tr|A8IVL6|A8IVL6_CHLRE	Predicted protein	6e-37	tr|D8TWU7|D8TWU7_VOLCA	2e-32	scaffold1.g5680.t1	6e-143	scaffold1_size3450625	1e-48
I0YL20_9CHLO	Heme peroxidase-related protein	heme peroxidase-related	F:catalytic activity; F:binding; P:cellular process; P:response to stress	EC:1.11.1.7	IPR001509 (PFAM); IPR016040 (G3DSA:3.40.50.GENE3D); PTHR10366 (PANTHER); PTHR10366:SF411 (PANTHER); IPR016040 (SUPERFAMILY)	tr|A8JGL7|A8JGL7_CHLRE	Heme peroxidase-related protein	4e-95	tr|D8UDB8|D8UDB8_VOLCA	2e-82	scaffold10.g2477.t1	5e-65	scaffold26_size333660	3e-06
I0YL21_9CHLO	Galactose oxidase	galactose oxidase	F:protein binding		PF13854 (PFAM); IPR015915 (G3DSA:2.120.10.GENE3D); IPR006652 (PFAM); PTHR23244 (PANTHER); SSF117281 (SUPERFAMILY); SSF117281 (SUPERFAMILY)	tr|A8J1G0|A8J1G0_CHLRE	Predicted protein	7e-24	tr|D8U9B6|D8U9B6_VOLCA	2e-56
I0YL22_9CHLO	Ribosomal protein L18 component of cytosolic 80S ribosome and 60S large subunit	60S ribosomal L18-3	F:RNA binding; F:structural molecule activity; C:cytosol; C:ribosome; P:translation		IPR021131 (PFAM); G3DSA:3.100.10.10 (GENE3D); IPR000039 (PANTHER); IPR021131 (SUPERFAMILY)	tr|A8IKZ2|A8IKZ2_CHLRE	Ribosomal protein L18	2e-102	tr|D8TPB6|D8TPB6_VOLCA	9e-103	scaffold12.g8232.t1	1e-96	scaffold12_size2011427	6e-15
I0YL23_9CHLO	Uncharacterized protein	SMG7-like isoform X1	F:protein binding		IPR018834 (PFAM); IPR019458 (PFAM); PTHR15696 (PANTHER); PTHR15696:SF0 (PANTHER); IPR011990 (SUPERFAMILY)	tr|A8J9L4|A8J9L4_CHLRE	Predicted protein	8e-28	tr|D8U0T7|D8U0T7_VOLCA	3e-57	scaffold12.g8231.t1	5e-38
I0YL24_9CHLO	Ribosomal protein S7 component of cytosolic 80S ribosome and 40S small subunit	40S ribosomal S7	F:structural molecule activity; C:cytosol; C:ribosome; P:nucleobase-containing compound metabolic process; P:translation		IPR000554 (PFAM); IPR000554 (PANTHER)	tr|A8JGI9|A8JGI9_CHLRE	Ribosomal protein S7	3e-107	tr|D8TNN9|D8TNN9_VOLCA	1e-108	scaffold12.g8219.t1	1e-94	scaffold12_size2011427	9e-15
I0YL25_9CHLO	Serine/threonine-protein phosphatase	serine threonine- phosphatase PP-X isozyme 2	C:membrane; P:cellular protein modification process; P:biosynthetic process; F:kinase activity; C:plastid; F:hydrolase activity	EC:2.7.1; EC:3.1.3.16; EC:3.1; EC:3.1.3.41	IPR006186 (PRINTS); IPR006186 (SMART); IPR004843 (PFAM); IPR029052 (G3DSA:3.60.21.GENE3D); PTHR11668:SF278 (PANTHER); PTHR11668 (PANTHER); IPR029052 (SUPERFAMILY)	tr|A8JDN1|A8JDN1_CHLRE	Serine/threonine-protein phosphatase	0	tr|D8UDZ3|D8UDZ3_VOLCA	0	scaffold12.g8233.t1	0	scaffold12_size2011427	8e-36
I0YL29_9CHLO	TFIID-31kDa-domain-containing protein	transcription initiation factor TFIID subunit 9	F:protein binding; C:membrane; P:biosynthetic process; P:nucleobase-containing compound metabolic process		IPR009072 (G3DSA:1.10.20.GENE3D); IPR003162 (PFAM); PTHR12595 (PANTHER); PTHR12595:SF6 (PANTHER); IPR009072 (SUPERFAMILY)	tr|A8JFR8|A8JFR8_CHLRE	Predicted protein	3e-18	tr|D8TZ69|D8TZ69_VOLCA	4e-19	scaffold12.g8248.t1	1e-19	scaffold12_size2011427	2e-11
I0YL34_9CHLO	ARM repeat-containing protein	transportin-1-like isoform X1	C:nucleus; F:protein binding; P:transport		IPR001494 (PFAM); PF13513 (PFAM); IPR011989 (G3DSA:1.25.10.GENE3D); PTHR10527 (PANTHER); PTHR10527:SF3 (PANTHER); IPR001494 (PROSITE_PROFILES); IPR021133 (PROSITE_PROFILES); IPR016024 (SUPERFAMILY)	tr|A8J5Y9|A8J5Y9_CHLRE	Transportin	0	tr|D8UHH9|D8UHH9_VOLCA	0	scaffold12.g8169.t1	0	scaffold12_size2011427	9e-13
I0YL36_9CHLO	Soluble inorganic pyrophosphatase 2	soluble inorganic pyrophosphatase	P:generation of precursor metabolites and energy; C:mitochondrion; F:binding; P:nucleobase-containing compound metabolic process; F:hydrolase activity	EC:3.6.1.1; EC:3.6.1	IPR008162 (PFAM); IPR008162 (G3DSA:3.90.80.GENE3D); PTHR10286:SF13 (PANTHER); IPR008162 (PANTHER); IPR008162 (HAMAP); IPR008162 (SUPERFAMILY)	tr|A8J133|A8J133_CHLRE	Soluble inorganic pyrophosphatase	6e-107	tr|D8U7Y6|D8U7Y6_VOLCA	1e-107	scaffold1.g5801.t1	5e-92	scaffold1_size3450625	3e-16
I0YL37_9CHLO	Thioredoxin-like protein	Thioredoxin H2-2	C:cell; P:cellular homeostasis; F:catalytic activity; P:metabolic process		IPR013766 (PFAM); IPR012336 (G3DSA:3.40.30.GENE3D); IPR005746 (PANTHER); IPR013766 (PROSITE_PROFILES); IPR012336 (SUPERFAMILY)	tr|A8JGN2|A8JGN2_CHLRE	Thioredoxin-like protein	2e-21	tr|D8TN48|D8TN48_VOLCA	3e-22	scaffold12.g8290.t1	7e-31
I0YL39_9CHLO	Spliceosome component, nuclear pre-mRNA splicing factor	pre-mRNA-processing factor 19-like	F:protein binding; P:cellular protein modification process; F:transferase activity		IPR003613 (SMART); IPR001680 (SMART); IPR015943 (G3DSA:2.130.10.GENE3D); IPR013915 (PFAM); IPR013083 (G3DSA:3.30.40.GENE3D); IPR001680 (PFAM); PTHR22840 (PANTHER); IPR003613 (PROSITE_PROFILES); IPR017986 (PROSITE_PROFILES); IPR001680 (PROSITE_PROFILES); IPR017986 (SUPERFAMILY); SSF57850 (SUPERFAMILY)	tr|A8I9S6|A8I9S6_CHLRE	Spliceosome component, nuclear pre-mRNA splicing factor	1e-179	tr|D8TPV8|D8TPV8_VOLCA	2e-176	scaffold12.g8229.t1	2e-77	scaffold18_size793176	3e-19
I0YL40_9CHLO	60S ribosomal protein L7	60S ribosomal L7-2	C:ribosome		IPR016082 (PFAM); IPR016082 (G3DSA:3.30.1390.GENE3D); IPR005998 (TIGRFAM); IPR012988 (PFAM); PTHR11524 (PANTHER); IPR016082 (SUPERFAMILY)	tr|A8IVE2|A8IVE2_CHLRE	Ribosomal protein L7	2e-111	tr|D8TWQ8|D8TWQ8_VOLCA	7e-116	scaffold12.g8230.t1	9e-106	scaffold12_size2011427	8e-14
I0YL41_9CHLO	Pyruvate decarboxylase	pyruvate decarboxylase 2	F:catalytic activity; F:binding		IPR012110 (PIRSF); IPR011766 (PFAM); IPR029035 (G3DSA:3.40.50.GENE3D); IPR029061 (G3DSA:3.40.50.GENE3D); IPR012000 (PFAM); IPR012001 (PFAM); IPR029061 (G3DSA:3.40.50.GENE3D); PTHR18968 (PANTHER); PTHR18968:SF125 (PANTHER); IPR029061 (SUPERFAMILY); IPR029061 (SUPERFAMILY); IPR029035 (SUPERFAMILY)	tr|A8IFE2|A8IFE2_CHLRE	Mitochondrial pyruvate dehydrogenase complex, E1 component, alpha subunit	0	tr|D8TZ32|D8TZ32_VOLCA	1e-169	scaffold6.g2867.t1	2e-130	scaffold6_size1922994	1e-10
I0YL44_9CHLO	Histone H2B (Fragment)	histone partial	C:nucleus; F:DNA binding; F:protein binding; P:cellular component organization		IPR000558 (PRINTS); IPR000558 (SMART); IPR007125 (PFAM); IPR009072 (G3DSA:1.10.20.GENE3D); IPR000558 (PANTHER); IPR009072 (SUPERFAMILY)	tr|A8JJV5|A8JJV5_CHLRE	Histone H2B (Fragment)	3e-54	tr|D8U9Y1|D8U9Y1_VOLCA	2e-54	scaffold12.g8167.t1	1e-56	scaffold7_size1837125	2e-41
I0YL45_9CHLO	Histone H2A	Histone H2A	C:nucleus; F:DNA binding; F:protein binding		IPR002119 (PRINTS); IPR002119 (SMART); IPR007125 (PFAM); IPR032454 (PFAM); IPR009072 (G3DSA:1.10.20.GENE3D); PTHR23430 (PANTHER); IPR009072 (SUPERFAMILY)	tr|A8IR81|A8IR81_CHLRE	Histone H2A	5e-70	tr|D8UDT8|D8UDT8_VOLCA	7e-70	scaffold7.g3645.t1	7e-73	scaffold7_size1837125	1e-32
I0YL46_9CHLO	Peptide methionine sulfoxide reductase	peptide methionine sulfoxide reductase	F:catalytic activity; P:cellular protein modification process; P:response to stress	EC:1.8.4; EC:1.8.4.11	IPR002569 (PFAM); IPR002569 (G3DSA:3.30.1060.GENE3D); IPR002569 (TIGRFAM); PTHR10173:SF6 (PANTHER); IPR028427 (PANTHER); IPR002569 (HAMAP); IPR002569 (SUPERFAMILY)	tr|A8I1K5|A8I1K5_CHLRE	Peptide methionine sulfoxide reductase	3e-50	tr|D8TU67|D8TU67_VOLCA	5e-46	scaffold16.g113.t1	4e-43	scaffold16_size857609	5e-08
I0YL48_9CHLO	Kinase-like protein	Dual specificity kinase splA	F:nucleotide binding; F:protein binding; P:cellular protein modification process; F:kinase activity		IPR002110 (SMART); IPR000719 (SMART); G3DSA:1.10.510.10 (GENE3D); IPR020683 (G3DSA:1.25.40.GENE3D); IPR020683 (PFAM); IPR000719 (PFAM); PTHR23257 (PANTHER); PTHR23257:SF366 (PANTHER); IPR020683 (PROSITE_PROFILES); IPR000719 (PROSITE_PROFILES); IPR002110 (PROSITE_PROFILES); IPR011009 (SUPERFAMILY); IPR020683 (SUPERFAMILY)	tr|A8IK77|A8IK77_CHLRE	Protein kinase	9e-158	tr|D8TP31|D8TP31_VOLCA	8e-124	scaffold27.g6013.t1	3e-128	scaffold27_size312300	6e-23
I0YL49_9CHLO	Uncharacterized protein (Fragment)	Glutathione gamma-glutamylcysteinyltransferase 1	P:secondary metabolic process; P:biosynthetic process; F:transferase activity; F:binding; P:cellular process	EC:2.3.2.15	IPR007719 (PFAM); PTHR33447 (PANTHER); PTHR33447:SF2 (PANTHER); IPR007719 (PROSITE_PROFILES); SSF54001 (SUPERFAMILY)	tr|A8I6U6|A8I6U6_CHLRE	Predicted protein (Fragment)	2e-87	tr|D8U8Z5|D8U8Z5_VOLCA	3e-89			scaffold2_size3998120	2e-25
I0YL51_9CHLO	T-complex protein 1 subunit delta	T-complex 1 subunit delta	F:nucleotide binding; F:protein binding; C:cytosol; P:cellular process		IPR017998 (PRINTS); IPR027409 (G3DSA:3.50.7.GENE3D); IPR012717 (TIGRFAM); IPR027413 (G3DSA:1.10.560.GENE3D); IPR002423 (PFAM); IPR027410 (G3DSA:3.30.260.GENE3D); PTHR11353 (PANTHER); SSF48592 (SUPERFAMILY); SSF54849 (SUPERFAMILY); IPR027409 (SUPERFAMILY)	tr|A8JE04|A8JE04_CHLRE	T-complex protein 1 subunit delta (Fragment)	0	tr|D8TKY9|D8TKY9_VOLCA	0	scaffold6.g2804.t1	0	scaffold6_size1922994	3e-22
I0YL52_9CHLO	Uncharacterized protein	Histone H1	C:nucleus; F:DNA binding; P:cellular component organization		PR01217 (PRINTS); IPR005818 (SMART); IPR011991 (G3DSA:1.10.10.GENE3D); IPR005818 (PFAM); PTHR11467 (PANTHER); IPR005818 (PROSITE_PROFILES); IPR011991 (SUPERFAMILY)	tr|A8HRZ0|A8HRZ0_CHLRE	Histone H1	4e-11	tr|D8TMZ2|D8TMZ2_VOLCA	9e-12
I0YL53_9CHLO	Uncharacterized protein	endonuclease 2-like isoform X1	F:nucleotide binding; F:DNA binding; F:nuclease activity; P:DNA metabolic process; P:response to stress	EC:3.6.1; EC:3.6.1.3; EC:3.1; EC:3.6.1.15	IPR000432 (SMART); IPR005747 (PIRSF); IPR000432 (PFAM); IPR027417 (G3DSA:3.40.50.GENE3D); PTHR11361 (PANTHER); IPR005747 (PTHR11361:PANTHER); IPR007696 (SUPERFAMILY); IPR027417 (SUPERFAMILY)	tr|A8HMH7|A8HMH7_CHLRE	Predicted protein	4e-135	tr|D8U5Q2|D8U5Q2_VOLCA	3e-171	scaffold2.g7015.t1	1e-67	scaffold3_size2545224	6e-19
I0YL54_9CHLO	Uncharacterized protein	hypothetical protein COCSUDRAFT_59606	C:membrane; C:integral component of membrane		no IPS match	tr|A8HPT0|A8HPT0_CHLRE	Putative uncharacterized protein	4e-12	tr|D8U0E0|D8U0E0_VOLCA	4e-17
I0YL57_9CHLO	RCC1/BLIP-II	RCC1 BLIP-II	F:metal ion binding		IPR000408 (PRINTS); IPR013591 (PFAM); IPR000408 (PFAM); IPR011993 (G3DSA:2.30.29.GENE3D); IPR009091 (G3DSA:2.130.10.GENE3D); PTHR22870 (PANTHER); IPR000408 (PROSITE_PROFILES); IPR013591 (PROSITE_PROFILES); IPR009091 (SUPERFAMILY); IPR011993 (SUPERFAMILY); IPR009091 (SUPERFAMILY)	tr|A8JGB3|A8JGB3_CHLRE	Predicted protein	4e-25	tr|D8UIR7|D8UIR7_VOLCA	2e-36	scaffold2.g6935.t1	9e-56	scaffold2_size3998120	4e-20
I0YL58_9CHLO	Urea carboxylase	urea carboxylase	F:nucleotide binding; F:catalytic activity; C:cytoplasm; P:lipid metabolic process; P:biosynthetic process; P:cellular process	EC:6.3.4.14	IPR003778 (SMART); IPR005482 (SMART); IPR003833 (SMART); IPR024946 (G3DSA:3.30.1360.GENE3D); IPR005479 (PFAM); G3DSA:2.40.50.100 (GENE3D); IPR003778 (TIGRFAM); IPR005482 (PFAM); IPR029000 (G3DSA:2.40.100.GENE3D); IPR013816 (G3DSA:3.30.470.GENE3D); IPR014084 (TIGRFAM); IPR000089 (PFAM); IPR003833 (PFAM); IPR005481 (PFAM); IPR013815 (G3DSA:3.30.1490.GENE3D); IPR003778 (PFAM); IPR016185 (G3DSA:3.40.…	tr|A8JGG4|A8JGG4_CHLRE	Urea carboxylase	0	tr|D8UF47|D8UF47_VOLCA	0	scaffold8.g1379.t1	5e-94	scaffold32_size168507	3e-52
I0YL59_9CHLO	Aldo/keto reductase	Aldo keto reductase	F:catalytic activity; P:metabolic process; C:plastid		IPR020471 (PRINTS); IPR023210 (G3DSA:3.20.20.GENE3D); IPR023210 (PFAM); IPR001395 (PANTHER); PTHR11732:SF150 (PANTHER); IPR023210 (SUPERFAMILY)	tr|A8JFJ4|A8JFJ4_CHLRE	Predicted protein (Fragment)	1e-101	tr|D8TS35|D8TS35_VOLCA	2e-119	scaffold1.g5317.t1	7e-75	scaffold1_size3450625	8e-32
I0YL60_9CHLO	Nodulin-like-domain-containing protein	MFS general substrate transporter	C:membrane		IPR010658 (PFAM); G3DSA:1.20.1250.20 (GENE3D); G3DSA:1.20.1250.20 (GENE3D); PTHR21576 (PANTHER); IPR020846 (SUPERFAMILY); IPR020846 (SUPERFAMILY)	tr|A8HMG5|A8HMG5_CHLRE	Predicted protein	6e-40	tr|D8U5Q8|D8U5Q8_VOLCA	3e-38	scaffold20.g7685.t1	7e-28	scaffold20_size1437327	9e-16
I0YL65_9CHLO	Uncharacterized protein	hypothetical protein COCSUDRAFT_59618	C:membrane		IPR009790 (PFAM)	tr|A8I657|A8I657_CHLRE	Predicted protein	2e-37	tr|D8U6N7|D8U6N7_VOLCA	5e-39	scaffold2.g6937.t1	5e-22
I0YL67_9CHLO	Uncharacterized protein	peptidyl-prolyl cis-trans isomerase CYP65	P:cellular protein modification process; F:transferase activity	EC:5.2.1.8	IPR002130 (PRINTS); IPR003613 (SMART); IPR013083 (G3DSA:3.30.40.GENE3D); IPR002130 (PFAM); IPR029000 (G3DSA:2.40.100.GENE3D); IPR024936 (PANTHER); PTHR11071:SF147 (PANTHER); IPR002130 (PROSITE_PROFILES); IPR003613 (PROSITE_PROFILES); IPR029000 (SUPERFAMILY); SSF57850 (SUPERFAMILY)	tr|A8I0M0|A8I0M0_CHLRE	Peptidyl-prolyl cis-trans isomerase, cyclophilin-type	0	tr|D8TW46|D8TW46_VOLCA	6e-56	scaffold12.g8218.t1	2e-92	scaffold12_size2011427	3e-12
I0YL68_9CHLO	Pkinase-domain-containing protein (Fragment)	Pkinase-domain-containing partial	F:nucleotide binding; P:cellular protein modification process; F:kinase activity	EC:2.7.11	IPR000719 (SMART); G3DSA:1.10.510.10 (GENE3D); G3DSA:3.30.200.20 (GENE3D); IPR000719 (PFAM); IPR020636 (PANTHER); IPR000719 (PROSITE_PROFILES); IPR011009 (SUPERFAMILY)	tr|Q6V8K6|Q6V8K6_CHLRE	Gliding motility related CaM kinase	3e-139	tr|D8UKJ5|D8UKJ5_VOLCA	1e-139	scaffold2.g6947.t1	7e-109	scaffold2_size3998120	2e-22
I0YL69_9CHLO	ClpP/crotonase	3-hydroxyisobutyryl- hydrolase mitochondrial isoform X2	P:catabolic process; P:cellular process; F:hydrolase activity	EC:3.1.2.4; EC:3.1.2	IPR029045 (G3DSA:3.90.226.GENE3D); IPR032259 (PFAM); PTHR11941 (PANTHER); PTHR11941:SF47 (PANTHER); IPR029045 (SUPERFAMILY)	tr|A8J8Y6|A8J8Y6_CHLRE	Predicted protein	4e-38	tr|D8TII0|D8TII0_VOLCA	5e-26	scaffold6.g2791.t1	2e-40	scaffold6_size1922994	7e-07
I0YL73_9CHLO	Uncharacterized protein	peroxisome biogenesis 22	F:nucleic acid binding; C:membrane		IPR000467 (SMART); IPR000467 (PFAM); PTHR34126:SF1 (PANTHER); PTHR34126 (PANTHER); IPR000467 (PROSITE_PROFILES)	tr|A8J251|A8J251_CHLRE	Predicted protein	1e-35	tr|D8UIW6|D8UIW6_VOLCA	6e-44	scaffold3.g6418.t1	4e-20	scaffold2_size3998120	6e-10
I0YL74_9CHLO	Uncharacterized protein	probable DNA primase large subunit	P:biosynthetic process; F:transferase activity; F:binding; P:DNA metabolic process; C:nucleolus	EC:2.7.7; EC:2.7.7.6	IPR007238 (PFAM); PTHR10537:SF3 (PANTHER); PTHR10537 (PANTHER)	tr|A8JFM3|A8JFM3_CHLRE	Predicted protein (Fragment)	4e-41	tr|D8U5D4|D8U5D4_VOLCA	4e-101	scaffold2.g6989.t1	1e-130	scaffold2_size3998120	5e-27
I0YL75_9CHLO	DUF1042-domain-containing protein	sperm flagellar	F:protein binding		IPR010441 (PFAM); IPR010441 (PANTHER); PTHR12509:SF9 (PANTHER); IPR001715 (SUPERFAMILY)	tr|Q52WZ8|Q52WZ8_CHLRE	Predicted protein	5e-74	tr|D8TJL1|D8TJL1_VOLCA	9e-59	scaffold2.g7000.t1	1e-27	scaffold2_size3998120	5e-15
I0YL76_9CHLO	Uncharacterized protein	ATP synthase I	C:membrane		PTHR34118:SF3 (PANTHER); PTHR34118 (PANTHER)	tr|A8HNA8|A8HNA8_CHLRE	ATP synthase I-like protein	7e-51	tr|D8TQG4|D8TQG4_VOLCA	8e-49	scaffold2.g6999.t1	1e-44	scaffold2_size3998120	1e-14
I0YL77_9CHLO	ADP-ribosylation factor 1	ADP-ribosylation factor-like	F:nucleotide binding; P:signal transduction; C:intracellular; F:transporter activity		IPR006689 (PRINTS); SM00175 (SMART); SM00177 (SMART); SM00178 (SMART); IPR005225 (TIGRFAM); IPR006689 (PFAM); IPR027417 (G3DSA:3.40.50.GENE3D); PTHR11711 (PANTHER); PTHR11711:SF181 (PANTHER); IPR024156 (PROSITE_PROFILES); IPR027417 (SUPERFAMILY)	sp|P51821|ARF1_CHLRE	ADP-ribosylation factor 1 OS=Chlamydomonas reinhardtii GN=ARF1 PE=2 SV=2	3e-126	tr|D8TPC8|D8TPC8_VOLCA	1e-120	scaffold2.g6998.t1	1e-129	scaffold2_size3998120	7e-28
I0YL78_9CHLO	Protein phosphatase methylesterase	phosphatase methylesterase 1-like	C:nucleus; P:cellular protein modification process; C:vacuole; F:hydrolase activity	EC:3.1.1.1	IPR000073 (PFAM); IPR029058 (G3DSA:3.40.50.GENE3D); IPR016812 (PANTHER); IPR029058 (SUPERFAMILY)	tr|A8J5W6|A8J5W6_CHLRE	Predicted protein (Fragment)	2e-110	tr|D8UHI9|D8UHI9_VOLCA	2e-122			scaffold2_size3998120	7e-19
I0YL79_9CHLO	Uncharacterized protein	chloroplast photosystem II-associated 22 kDa	C:membrane		IPR023329 (G3DSA:1.10.3460.GENE3D); PTHR14154 (PANTHER); PTHR14154:SF17 (PANTHER); SSF103511 (SUPERFAMILY)	tr|A8HPM5|A8HPM5_CHLRE	Chloroplast photosystem II-associated 22 kDa protein	5e-34	tr|D8UAT1|D8UAT1_VOLCA	4e-35	scaffold8.g1356.t1	8e-28	scaffold8_size1730130	8e-12
I0YL84_9CHLO	Uncharacterized protein (Fragment)	switch 2	F:nucleotide binding		IPR001650 (SMART); IPR014001 (SMART); IPR000330 (PFAM); IPR001650 (PFAM); IPR027417 (G3DSA:3.40.50.GENE3D); IPR027417 (G3DSA:3.40.50.GENE3D); PTHR10799:SF65 (PANTHER); PTHR10799 (PANTHER); IPR014001 (PROSITE_PROFILES); IPR001650 (PROSITE_PROFILES); IPR027417 (SUPERFAMILY); IPR027417 (SUPERFAMILY)	tr|A8HW07|A8HW07_CHLRE	SNF2/RAD54 family protein	3e-59	tr|D8TIE9|D8TIE9_VOLCA	6e-75	scaffold2.g6990.t1	4e-139	scaffold20_size1437327	3e-20
I0YL86_9CHLO	Uncharacterized protein	TIC chloroplastic			IPR006636 (SMART)	tr|A8IK91|A8IK91_CHLRE	Translocon component Tic40-related protein	2e-37	tr|D8TP24|D8TP24_VOLCA	4e-49	scaffold12.g8207.t1	4e-36	scaffold12_size2011427	1e-10
I0YL87_9CHLO	TLD-domain-containing protein	TLD domain-containing 2	C:membrane; C:integral component of membrane		IPR006571 (SMART); IPR006571 (PFAM); PTHR23354 (PANTHER)	tr|A8IIM4|A8IIM4_CHLRE	Predicted protein	5e-56	tr|D8TJB0|D8TJB0_VOLCA	3e-59	scaffold12.g7982.t1	4e-45	scaffold12_size2011427	2e-08
I0YL88_9CHLO	Histone H2B	histone partial	C:nucleus; F:DNA binding; F:protein binding; P:cellular component organization		IPR000558 (PRINTS); IPR000558 (SMART); IPR007125 (PFAM); IPR009072 (G3DSA:1.10.20.GENE3D); IPR000558 (PANTHER); IPR009072 (SUPERFAMILY)	tr|A8JJV5|A8JJV5_CHLRE	Histone H2B (Fragment)	4e-54	tr|D8U9Y1|D8U9Y1_VOLCA	3e-54	scaffold12.g8167.t1	3e-57	scaffold7_size1837125	3e-41
I0YL89_9CHLO	WD40 repeat-like protein	WD40 repeat	F:protein binding		IPR020472 (PRINTS); IPR001680 (SMART); IPR001680 (PFAM); IPR015943 (G3DSA:2.130.10.GENE3D); PTHR14221 (PANTHER); IPR001680 (PROSITE_PROFILES); IPR017986 (PROSITE_PROFILES); IPR017986 (SUPERFAMILY)	tr|A8HV78|A8HV78_CHLRE	Predicted protein (Fragment)	2e-25	tr|D8TI98|D8TI98_VOLCA	5e-37	scaffold12.g8211.t1	7e-129	scaffold12_size2011427	5e-15
I0YL90_9CHLO	Uncharacterized protein	Histone H1	C:nucleus; F:DNA binding; P:cellular component organization		IPR005819 (PRINTS); IPR005818 (SMART); IPR005818 (PFAM); IPR011991 (G3DSA:1.10.10.GENE3D); PTHR11467 (PANTHER); IPR005818 (PROSITE_PROFILES); IPR011991 (SUPERFAMILY)	tr|Q39576|Q39576_CHLRE	Histone H1	2e-11	tr|D8TMZ2|D8TMZ2_VOLCA	1e-16			scaffold12_size2011427	4e-06
I0YL92_9CHLO	Uncharacterized protein	single helix LHC light	C:plastid		IPR023329 (G3DSA:1.10.3460.GENE3D); IPR022796 (PFAM); PTHR14154:SF11 (PANTHER); PTHR14154 (PANTHER); SSF103511 (SUPERFAMILY)	tr|Q5W9T3|Q5W9T3_CHLRE	Lhc-like protein Lhl2	2e-16	tr|D8TZQ5|D8TZQ5_VOLCA	2e-16	scaffold12.g8160.t1	4e-14
I0YL99_9CHLO	Uncharacterized protein	UBX domain-containing	F:protein binding		IPR006577 (SMART); G3DSA:3.10.20.90 (GENE3D); IPR012336 (G3DSA:3.40.30.GENE3D); IPR001012 (PFAM); PF13899 (PFAM); G3DSA:1.10.8.10 (GENE3D); PF14555 (PFAM); PTHR23322:SF6 (PANTHER); PTHR23322 (PANTHER); IPR003903 (PROSITE_PROFILES); IPR001012 (PROSITE_PROFILES); IPR029071 (SUPERFAMILY); IPR012336 (SUPERFAMILY); IPR009060 (SUPERFAMILY)	tr|A8IRX8|A8IRX8_CHLRE	Predicted protein	6e-68	tr|D8UEX6|D8UEX6_VOLCA	9e-76	scaffold12.g8221.t1	5e-70	scaffold12_size2011427	4e-08
I0YLA3_9CHLO	Serine hydroxymethyltransferase	serine hydroxymethyltransferase mitochondrial-like	F:nucleotide binding; F:nucleic acid binding; P:metabolic process; F:transferase activity; P:cellular process	EC:2.1.2.1	IPR001085 (PIRSF); IPR015421 (G3DSA:3.40.640.GENE3D); IPR015422 (G3DSA:3.90.1150.GENE3D); IPR001085 (PFAM); IPR001085 (PANTHER); PTHR11680:SF10 (PANTHER); IPR001085 (HAMAP); IPR015424 (SUPERFAMILY)	tr|Q8W4V3|Q8W4V3_CHLRE	Serine hydroxymethyltransferase	0	tr|D8UK48|D8UK48_VOLCA	0	scaffold12.g8197.t1	0	scaffold21_size696144	2e-53
I0YLA4_9CHLO	Uncharacterized protein	hypothetical protein COCSUDRAFT_59655	F:DNA binding; F:transcription factor activity, sequence-specific DNA binding; P:biosynthetic process; P:nucleobase-containing compound metabolic process; C:intracellular		IPR004827 (SMART); G3DSA:1.20.5.170 (GENE3D); IPR004827 (PROSITE_PROFILES); SSF57959 (SUPERFAMILY)	tr|A8J9C6|A8J9C6_CHLRE	Predicted protein	9e-25	tr|D8UEN9|D8UEN9_VOLCA	1e-13	scaffold20.g7855.t1	1e-12
I0YLA5_9CHLO	P-loop containing nucleoside triphosphate hydrolase protein (Fragment)	P-loop containing nucleoside triphosphate hydrolase partial	F:nucleotide binding; C:membrane; F:hydrolase activity	EC:3.6.1; EC:3.6.1.3; EC:3.6.1.15	IPR003593 (SMART); IPR003439 (PFAM); IPR013525 (PFAM); IPR027417 (G3DSA:3.40.50.GENE3D); PTHR19241 (PANTHER); IPR003439 (PROSITE_PROFILES); IPR027417 (SUPERFAMILY)	tr|A8JIS8|A8JIS8_CHLRE	Predicted protein	2e-52	tr|D8UDV8|D8UDV8_VOLCA	6e-174	scaffold19.g1828.t1	9e-125	scaffold19_size774562	8e-11
I0YLA6_9CHLO	Uncharacterized protein	peroxisomal membrane PMP22	C:membrane		IPR007248 (PFAM); IPR007248 (PANTHER)	tr|A8IP68|A8IP68_CHLRE	Predicted protein (Fragment)	2e-33	tr|D8TGV3|D8TGV3_VOLCA	4e-22	scaffold20.g7656.t1	8e-26	scaffold20_size1437327	3e-12
I0YLA7_9CHLO	Uncharacterized protein	hypothetical protein COCSUDRAFT_54765	F:nucleic acid binding; F:protein binding		IPR001878 (SMART); IPR001202 (SMART); G3DSA:2.20.70.10 (GENE3D); IPR001878 (PFAM); IPR001202 (PFAM); IPR001878 (G3DSA:4.10.60.GENE3D); IPR001202 (PROSITE_PROFILES); IPR001878 (PROSITE_PROFILES); IPR001202 (SUPERFAMILY); IPR001878 (SUPERFAMILY)	tr|A8IL19|A8IL19_CHLRE	Predicted protein	2e-11	tr|D8TPD2|D8TPD2_VOLCA	4e-52	scaffold1.g5488.t1	5e-11	scaffold1_size3450625	6e-17
I0YLA9_9CHLO	Prohibitin	prohibitin- mitochondrial	C:membrane		IPR000163 (PRINTS); IPR001107 (SMART); IPR001107 (PFAM); IPR000163 (PANTHER); IPR001107 (SUPERFAMILY)	tr|A8J633|A8J633_CHLRE	Prohibitin	9e-151	tr|D8TNL8|D8TNL8_VOLCA	6e-149	scaffold1.g5357.t1	5e-157	scaffold1_size3450625	8e-27
I0YLB0_9CHLO	Uncharacterized protein	Diphthamide biosynthesis 1	P:cellular protein modification process; P:biosynthetic process		PIRSF004967 (PIRSF); IPR016435 (PFAM); IPR016435 (TIGRFAM); IPR016435 (PANTHER); PTHR10762:SF1 (PANTHER)	tr|A8J4I7|A8J4I7_CHLRE	Predicted protein (Fragment)	1e-169	tr|D8U6W2|D8U6W2_VOLCA	3e-162	scaffold12.g8026.t1	3e-43	scaffold12_size2011427	4e-18
I0YLB1_9CHLO	Cytochrome P450	cytochrome P450	F:catalytic activity; C:membrane; P:metabolic process; F:binding		IPR002401 (PRINTS); IPR001128 (PRINTS); IPR001128 (G3DSA:1.10.630.GENE3D); IPR001128 (PFAM); PTHR24301:SF2 (PANTHER); PTHR24301 (PANTHER); IPR001128 (SUPERFAMILY)	tr|A8JFT7|A8JFT7_CHLRE	Cytochrome P450, CYP711 clan	1e-75	tr|D8TZI9|D8TZI9_VOLCA	2e-48	scaffold4.g4737.t1	7e-58
I0YLB5_9CHLO	WD40 repeat-like protein	WD40 repeat	F:protein binding		IPR020472 (PRINTS); IPR001680 (SMART); IPR015943 (G3DSA:2.130.10.GENE3D); IPR001680 (PFAM); PTHR22847 (PANTHER); IPR017986 (PROSITE_PROFILES); IPR001680 (PROSITE_PROFILES); IPR017986 (SUPERFAMILY)	tr|A8IST2|A8IST2_CHLRE	Predicted protein (Fragment)	3e-25	tr|D8TRU6|D8TRU6_VOLCA	3e-14	scaffold8.g1715.t1	9e-14	scaffold1_size3450625	9e-10
I0YLB6_9CHLO	Zinc/iron permease	zinc transporter ZIP2-like isoform X2	C:membrane; F:transporter activity		IPR003689 (PFAM); PTHR11040:SF57 (PANTHER); PTHR11040 (PANTHER)	tr|A8INX4|A8INX4_CHLRE	ZIP family transporter	1e-46	tr|D8TS52|D8TS52_VOLCA	1e-31	scaffold12.g8196.t1	5e-54	scaffold12_size2011427	7e-12
I0YLB8_9CHLO	UPF0187-domain-containing protein	UPF0187 chloroplastic	C:membrane		IPR021134 (PFAM); PTHR33281:SF1 (PANTHER); PTHR33281 (PANTHER)	tr|A8JFR7|A8JFR7_CHLRE	Predicted protein	2e-77	tr|D8TWF8|D8TWF8_VOLCA	4e-75	scaffold12.g8256.t1	3e-94	scaffold12_size2011427	2e-24
I0YLB9_9CHLO	Carboxyl transferase	Methylcrotonoyl- carboxylase beta mitochondrial	P:catabolic process; C:mitochondrion; F:binding; F:transferase activity; P:cellular process		IPR029045 (G3DSA:3.90.226.GENE3D); IPR000022 (PFAM); PTHR22855 (PANTHER); PTHR22855:SF35 (PANTHER); IPR011763 (PROSITE_PROFILES); IPR011762 (PROSITE_PROFILES); IPR029045 (SUPERFAMILY); IPR029045 (SUPERFAMILY)	tr|A8JH46|A8JH46_CHLRE	Predicted protein	0	tr|D8TKT6|D8TKT6_VOLCA	0	scaffold12.g8292.t1	0	scaffold12_size2011427	6e-25
I0YLC0_9CHLO	Plasma-membrane proton-e	plasma membrane-type proton ATPase	F:nucleotide binding; P:cellular homeostasis; P:generation of precursor metabolites and energy; P:biosynthetic process; P:nucleobase-containing compound metabolic process; C:plasma membrane; C:intracellular; F:transporter activity; F:hydrolase activity	EC:3.6.1; EC:3.6.1.3; EC:3.6.3.6; EC:3.6.1.15	IPR001757 (PRINTS); PR00119 (PRINTS); IPR006534 (TIGRFAM); IPR023299 (G3DSA:3.40.1110.GENE3D); IPR008250 (PFAM); IPR001757 (TIGRFAM); IPR004014 (PFAM); IPR023298 (G3DSA:1.20.1110.GENE3D); PF00702 (PFAM); IPR008250 (G3DSA:2.70.150.GENE3D); IPR023299 (G3DSA:3.40.1110.GENE3D); PTHR24093:SF351 (PANTHER); PTHR24093 (PANTHER); SSF81665 (SUPERFAMILY); IPR023214 (SUPERFAMILY); SSF81653 (SUPERFAMILY)	tr|Q93Z22|Q93Z22_CHLRE	Plasma membrane ATPase	0	tr|D8TLV9|D8TLV9_VOLCA	0	scaffold20.g7731.t1	9e-108	scaffold43_size92162	2e-33
I0YLC1_9CHLO	AB-hydrolase YheT	abhydrolase domain-containing 3	F:hydrolase activity		IPR012020 (PIRSF); IPR029058 (G3DSA:3.40.50.GENE3D); IPR000073 (PFAM); PTHR10794 (PANTHER); PTHR10794:SF55 (PANTHER); IPR029058 (SUPERFAMILY)	tr|A8IWM0|A8IWM0_CHLRE	Predicted protein (Fragment)	4e-65	tr|D8UEV0|D8UEV0_VOLCA	3e-66	scaffold20.g7801.t1	9e-24	scaffold37_size123908	2e-18
I0YLC3_9CHLO	ClpP/crotonase (Fragment)	Methylglutaconyl- mitochondrial	F:catalytic activity; C:mitochondrion; P:metabolic process		IPR029045 (G3DSA:3.90.226.GENE3D); IPR014748 (G3DSA:1.10.12.GENE3D); IPR001753 (PFAM); PTHR11941 (PANTHER); PTHR11941:SF61 (PANTHER); IPR029045 (SUPERFAMILY)	tr|A8I9B0|A8I9B0_CHLRE	Predicted protein	7e-116	tr|D8TIZ3|D8TIZ3_VOLCA	5e-112	scaffold12.g8206.t1	1e-58	scaffold43_size92162	4e-27
I0YLC4_9CHLO	Biotin carboxylase	3-methylcrotonyl- carboxylase	F:nucleotide binding; F:catalytic activity; P:catabolic process; C:mitochondrion; P:lipid metabolic process; C:cytosol; P:biosynthetic process; C:ribosome; P:cellular process	EC:6.4.1.4; EC:6.4.1; EC:6.3.4.14	IPR005482 (SMART); IPR005482 (PFAM); IPR005481 (PFAM); IPR005479 (PFAM); IPR016185 (G3DSA:3.40.50.GENE3D); IPR013816 (G3DSA:3.30.470.GENE3D); IPR013815 (G3DSA:3.30.1490.GENE3D); PTHR18866 (PANTHER); IPR011764 (PROSITE_PROFILES); IPR011761 (PROSITE_PROFILES); SSF56059 (SUPERFAMILY); IPR011054 (SUPERFAMILY); IPR016185 (SUPERFAMILY)	tr|A8J979|A8J979_CHLRE	Methylcrotonoyl-CoA carboxylase alpha subunit	0	tr|D8UF54|D8UF54_VOLCA	2e-141	scaffold12.g8205.t1	0	scaffold32_size168507	2e-71
I0YLC5_9CHLO	DUF382-domain-containing protein	splicing factor 3B subunit 2-like	C:nucleus; C:membrane		IPR006568 (SMART); IPR007180 (PFAM); IPR007052 (PFAM); IPR006568 (PFAM); IPR008978 (G3DSA:2.60.40.GENE3D); PTHR12785:SF6 (PANTHER); PTHR12785 (PANTHER); IPR007052 (PROSITE_PROFILES); IPR008978 (SUPERFAMILY)	tr|A8JHC1|A8JHC1_CHLRE	Nuclear pre-mRNA splicing factor, component of splicing factor 3b (Fragment)	1e-162	tr|D8TNR4|D8TNR4_VOLCA	3e-169	scaffold12.g8170.t1	0	scaffold12_size2011427	1e-26
I0YLC6_9CHLO	ARM repeat-containing protein	ARM repeat-containing	F:RNA binding		IPR001313 (SMART); IPR001313 (PFAM); IPR011989 (G3DSA:1.25.10.GENE3D); PTHR12537:SF12 (PANTHER); PTHR12537 (PANTHER); IPR001313 (PROSITE_PROFILES); IPR033133 (PROSITE_PROFILES); IPR016024 (SUPERFAMILY)	tr|A8JI00|A8JI00_CHLRE	Puf protein (Fragment)	1e-75	tr|D8UI80|D8UI80_VOLCA	6e-84	scaffold12.g8204.t1	2e-65
I0YLC9_9CHLO	3',5'-cyclic-nucleotide phosphodiesterase (Fragment)	3 ,5 -cyclic-nucleotide phosphodiesterase	P:signal transduction; P:nucleobase-containing compound metabolic process; F:hydrolase activity	EC:3.1.4; EC:3.1.4.17; EC:3.1	IPR023088 (PRINTS); IPR002073 (G3DSA:1.10.1300.GENE3D); IPR002073 (PFAM); PTHR11347 (PANTHER); SSF109604 (SUPERFAMILY)	tr|A8ITN3|A8ITN3_CHLRE	3',5'-cyclic-nucleotide phosphodiesterase (Fragment)	1e-87	tr|D8TVU3|D8TVU3_VOLCA	9e-85	scaffold22.g6128.t1	5e-27
I0YLD2_9CHLO	Uncharacterized protein	hypothetical protein COCSUDRAFT_19866			PTHR36749 (PANTHER); PTHR36749:SF1 (PANTHER)	tr|A8I462|A8I462_CHLRE	Predicted protein	4e-49	tr|D8TW57|D8TW57_VOLCA	2e-23	scaffold12.g8277.t1	8e-38	scaffold12_size2011427	2e-08
I0YLD3_9CHLO	Uncharacterized protein	hypothetical protein COCSUDRAFT_59686	C:cytoskeleton; P:cellular component organization; P:anatomical structure morphogenesis		PTHR21694 (PANTHER); IPR029652 (PTHR21694:PANTHER)	sp|A8JF70|ODA1_CHLRE	Outer dynein arm protein 1	2e-33	tr|D8U773|D8U773_VOLCA	2e-34	scaffold12.g8164.t1	5e-29
I0YLD5_9CHLO	3-ketoacyl-CoA synthase	very-long-chain 3-ketoacyl- synthase	P:response to abiotic stimulus; C:membrane; P:lipid metabolic process; P:biosynthetic process; F:transferase activity; P:cellular process; P:response to stress		IPR012392 (PIRSF); IPR013601 (PFAM); IPR013747 (PFAM); IPR016039 (G3DSA:3.40.47.GENE3D); IPR016039 (G3DSA:3.40.47.GENE3D); IPR012392 (PANTHER); IPR016039 (SUPERFAMILY); IPR016039 (SUPERFAMILY)	tr|A8J6G8|A8J6G8_CHLRE	Predicted protein	1e-138	tr|D8THF4|D8THF4_VOLCA	9e-140	scaffold3.g6245.t1	2e-117	scaffold3_size2545224	4e-20
I0YLD6_9CHLO	Uncharacterized protein	guanosine-3 ,5 -bis(diphosphate) 3 -pyrophosphohydrolase isoform X2	P:nucleobase-containing compound metabolic process		IPR003607 (SMART); IPR007685 (SMART); IPR007685 (PFAM); IPR003607 (PFAM); IPR006674 (G3DSA:1.10.3210.GENE3D); G3DSA:3.30.460.10 (GENE3D); PTHR21262:SF7 (PANTHER); PTHR21262 (PANTHER); SSF109604 (SUPERFAMILY); SSF81301 (SUPERFAMILY)	tr|A8HP52|A8HP52_CHLRE	Predicted protein	4e-32	tr|D8UJ00|D8UJ00_VOLCA	2e-25	scaffold12.g8297.t1	2e-79	scaffold12_size2011427	3e-27
I0YLD9_9CHLO	HSP40/DnaJ peptide-binding protein	dnaJ homolog subfamily B member 4-like	F:protein binding; P:cellular process		G3DSA:2.60.260.20 (GENE3D); G3DSA:2.60.260.20 (GENE3D); IPR002939 (PFAM); PTHR24078:SF294 (PANTHER); PTHR24078 (PANTHER); IPR008971 (SUPERFAMILY); IPR008971 (SUPERFAMILY)	tr|A8HPT5|A8HPT5_CHLRE	DnaJ-like protein	2e-36	tr|D8U0F4|D8U0F4_VOLCA	1e-39	scaffold8.g1443.t1	1e-35	scaffold8_size1730130	4e-09
I0YLE0_9CHLO	60S ribosomal protein L5	60S ribosomal L5	F:RNA binding; F:structural molecule activity; P:cellular component organization; C:cytosol; C:ribosome; P:translation		IPR005485 (PRINTS); G3DSA:3.30.420.100 (GENE3D); IPR005485 (PFAM); IPR025607 (PFAM); IPR005485 (PANTHER); IPR005485 (HAMAP); SSF53137 (SUPERFAMILY)	tr|A8HP55|A8HP55_CHLRE	Ribosomal protein L5	8e-131	tr|D8TTR2|D8TTR2_VOLCA	2e-135	scaffold12.g8191.t1	9e-87	scaffold12_size2011427	3e-13
I0YLE1_9CHLO	Uncharacterized protein	hypothetical protein COCSUDRAFT_59693	F:protein binding		IPR032675 (G3DSA:3.80.10.GENE3D); IPR001611 (PFAM); SSF52047 (SUPERFAMILY)	tr|A8IL43|A8IL43_CHLRE	Predicted protein (Fragment)	4e-34	tr|D8TPC3|D8TPC3_VOLCA	5e-66	scaffold12.g8292.t1	4e-12
I0YLE2_9CHLO	UPF0016-domain-containing protein	GDT1 5	C:membrane; P:transport		IPR001727 (PFAM); IPR001727 (PANTHER)	tr|A8JFF7|A8JFF7_CHLRE	Predicted protein	7e-93	tr|D8UD61|D8UD61_VOLCA	1e-92	scaffold12.g8267.t1	5e-60	scaffold12_size2011427	3e-16
I0YLE3_9CHLO	Alpha/beta-hydrolase (Fragment)	alpha beta- partial	F:protein binding; P:catabolic process; C:plastid; P:cellular process; F:hydrolase activity	EC:3.1.1.1	IPR000073 (PFAM); IPR029058 (G3DSA:3.40.50.GENE3D); PTHR10992 (PANTHER); PTHR10992:SF879 (PANTHER); IPR029058 (SUPERFAMILY)	tr|A8JHC8|A8JHC8_CHLRE	Predicted protein (Fragment)	6e-62	tr|D8TNS6|D8TNS6_VOLCA	2e-78	scaffold13.g374.t1	3e-15
I0YLE4_9CHLO	Enhancer of polycomb-like protein	hypothetical protein COCSUDRAFT_68016	P:biosynthetic process; P:nucleobase-containing compound metabolic process; C:nucleoplasm		IPR013083 (G3DSA:3.30.40.GENE3D); IPR019542 (PFAM); IPR024943 (PANTHER)	tr|A8HRS2|A8HRS2_CHLRE	Enhancer of polycomb-like protein	1e-22	tr|D8UGN4|D8UGN4_VOLCA	9e-22	scaffold12.g8161.t1	6e-29
I0YLE7_9CHLO	Uncharacterized protein	polyadenylate-binding -interacting 11	F:nucleotide binding; F:nucleic acid binding		IPR000504 (SMART); IPR000504 (PFAM); IPR012677 (G3DSA:3.30.70.GENE3D); IPR009818 (PFAM); PTHR24012 (PANTHER); IPR000504 (PROSITE_PROFILES); IPR012677 (SUPERFAMILY); IPR012677 (SUPERFAMILY)	tr|A8IIL8|A8IIL8_CHLRE	RNA binding protein	3e-68	tr|D8TJA7|D8TJA7_VOLCA	2e-72	scaffold3.g6387.t1	1e-65	scaffold3_size2545224	4e-16
I0YLE8_9CHLO	DNA mismatch repair protein MutL	DNA mismatch repair MLH1	F:nucleotide binding; C:nucleus; F:DNA binding; P:DNA metabolic process; P:response to stress		IPR013507 (SMART); IPR014721 (G3DSA:3.30.230.GENE3D); IPR002099 (TIGRFAM); IPR003594 (G3DSA:3.30.565.GENE3D); IPR013507 (PFAM); IPR032189 (PFAM); PF13589 (PFAM); PTHR10073:SF40 (PANTHER); PTHR10073 (PANTHER); IPR020568 (SUPERFAMILY); IPR003594 (SUPERFAMILY)	tr|A8HM54|A8HM54_CHLRE	Mismatch repair protein	3e-105	tr|D8U5I5|D8U5I5_VOLCA	4e-102	scaffold23.g4087.t1	1e-69	scaffold2_size3998120	1e-08
I0YLE9_9CHLO	Uncharacterized protein	Oxysterol-binding -related 1C			IPR000648 (PFAM); IPR000648 (PANTHER); PTHR10972:SF100 (PANTHER); SSF144000 (SUPERFAMILY)	tr|A8J9C1|A8J9C1_CHLRE	Predicted protein	1e-36	tr|D8UJP2|D8UJP2_VOLCA	3e-21	scaffold9.g3091.t1	2e-27
I0YLF1_9CHLO	2-oxoglutarate dehydrogenase, E1 component	2-oxoglutarate mitochondrial-like	P:generation of precursor metabolites and energy; F:catalytic activity; P:catabolic process; C:cytoplasm; F:binding	EC:1.2.4.2	IPR011603 (PIRSF); IPR005475 (SMART); IPR001017 (PFAM); IPR011603 (TIGRFAM); IPR029061 (G3DSA:3.40.50.GENE3D); IPR005475 (PFAM); IPR029061 (G3DSA:3.40.50.GENE3D); IPR031717 (PFAM); PTHR23152:SF4 (PANTHER); IPR011603 (PANTHER); IPR029061 (SUPERFAMILY); IPR029061 (SUPERFAMILY)	tr|A8IVG0|A8IVG0_CHLRE	2-oxoglutarate dehydrogenase, E1 subunit	0	tr|D8TWV0|D8TWV0_VOLCA	0	scaffold7.g3603.t1	8e-83
I0YLF2_9CHLO	Amine oxidase	amine oxidase	F:catalytic activity; P:metabolic process		IPR001613 (PRINTS); IPR023753 (G3DSA:3.50.50.GENE3D); IPR002937 (PFAM); PTHR10742 (PANTHER); PTHR10742:SF288 (PANTHER); SSF54373 (SUPERFAMILY); IPR023753 (SUPERFAMILY)	tr|A8IZM6|A8IZM6_CHLRE	Amine oxidase-like protein	1e-121	tr|D8U817|D8U817_VOLCA	3e-127
I0YLF3_9CHLO	Signal recognition particle subunit SRP68	signal recognition particle subunit SRP68	F:RNA binding; C:cytoplasm; P:cellular component organization; P:transport		IPR026258 (PIRSF); IPR026258 (PFAM); PTHR12860 (PANTHER)	tr|A8HWK8|A8HWK8_CHLRE	Subunit of the signal recognition particle	5e-73	tr|D8TIL4|D8TIL4_VOLCA	7e-67	scaffold6.g2852.t1	1e-102	scaffold6_size1922994	4e-14
I0YLF5_9CHLO	P-loop containing nucleoside triphosphate hydrolase protein	P-loop containing nucleoside triphosphate hydrolase	F:nucleotide binding; C:membrane; F:hydrolase activity	EC:3.6.1; EC:3.6.1.3; EC:3.6.1.15	IPR003593 (SMART); IPR027417 (G3DSA:3.40.50.GENE3D); IPR003439 (PFAM); IPR013525 (PFAM); PTHR19241 (PANTHER); IPR003439 (PROSITE_PROFILES); IPR027417 (SUPERFAMILY)	tr|A8IVZ2|A8IVZ2_CHLRE	Predicted protein	1e-61	tr|D8UDV8|D8UDV8_VOLCA	0	scaffold19.g1828.t1	6e-159	scaffold32_size168507	4e-12
I0YLF6_9CHLO	Uncharacterized protein	S-adenosyl-L-methionine-dependent methyltransferases superfamily	C:nucleus		IPR029063 (G3DSA:3.40.50.GENE3D); IPR019410 (PFAM); PTHR14614:SF30 (PANTHER); PTHR14614 (PANTHER); IPR029063 (SUPERFAMILY)	tr|A8IU01|A8IU01_CHLRE	Predicted protein	8e-73	tr|D8TZB4|D8TZB4_VOLCA	3e-72	scaffold5.g623.t1	3e-37	scaffold6_size1922994	2e-07
I0YLF7_9CHLO	Short-chain dehydrogenase/reductase SDR (Fragment)	3-oxoacyl-ACP reductase	F:catalytic activity; P:metabolic process		IPR002347 (PRINTS); IPR002347 (PRINTS); SM00822 (SMART); IPR016040 (G3DSA:3.40.50.GENE3D); PF13561 (PFAM); IPR002347 (PANTHER); IPR016040 (SUPERFAMILY)	tr|A8JBX4|A8JBX4_CHLRE	Short-chain dehydrogenase/reductase SDR	9e-112	tr|D8TV99|D8TV99_VOLCA	4e-117	scaffold4.g4863.t1	6e-103	scaffold56_size38850	1e-26
I0YLF9_9CHLO	WD40 repeat-like protein	uncharacterized WD repeat-containing	F:protein binding		IPR001680 (SMART); IPR015943 (G3DSA:2.130.10.GENE3D); PTHR22847 (PANTHER); PTHR22847:SF453 (PANTHER); IPR017986 (PROSITE_PROFILES); IPR017986 (SUPERFAMILY)	tr|A8J051|A8J051_CHLRE	Predicted protein (Fragment)	3e-103	tr|D8U7V7|D8U7V7_VOLCA	3e-105	scaffold2.g6987.t1	5e-28
I0YLG0_9CHLO	Uncharacterized protein (Fragment)	hypothetical protein COCSUDRAFT_8175, partial	C:membrane		PTHR31485 (PANTHER); PTHR31485:SF7 (PANTHER)	tr|A8J5Z2|A8J5Z2_CHLRE	Predicted protein (Fragment)	1e-60	tr|D8UHH7|D8UHH7_VOLCA	5e-56	scaffold24.g2967.t1	2e-68	scaffold1_size3450625	1e-17
I0YLG1_9CHLO	Uncharacterized protein	Coiled-coil domain-containing 6			IPR019152 (PFAM); IPR019152 (PANTHER); PTHR15276:SF0 (PANTHER)	tr|A8J246|A8J246_CHLRE	Coiled-coil domain 6-like protein	6e-50	tr|D8UJB3|D8UJB3_VOLCA	9e-52
I0YLG2_9CHLO	Eukaryotic-type signal peptide peptidase	signal peptide peptidase-like	P:protein metabolic process; C:cytoplasm; C:membrane; C:endoplasmic reticulum; F:hydrolase activity	EC:3.4.23	IPR006639 (SMART); IPR007369 (PFAM); IPR007369 (PANTHER)	tr|A8IGT6|A8IGT6_CHLRE	Signal peptide peptidase, eukaryotic-type	4e-111	tr|D8TPI8|D8TPI8_VOLCA	3e-112	scaffold2.g6988.t1	3e-112	scaffold2_size3998120	6e-11
I0YLG3_9CHLO	Nuclear RNA helicase-like protein Bat1	DEAD-box ATP-dependent RNA helicase 56-like	F:nucleic acid binding; F:nucleotide binding; F:hydrolase activity	EC:3.6.1; EC:3.6.1.15	IPR001650 (SMART); IPR014001 (SMART); IPR001650 (PFAM); IPR027417 (G3DSA:3.40.50.GENE3D); IPR011545 (PFAM); IPR027417 (G3DSA:3.40.50.GENE3D); PTHR24031 (PANTHER); PTHR24031:SF290 (PANTHER); IPR001650 (PROSITE_PROFILES); IPR014001 (PROSITE_PROFILES); IPR014014 (PROSITE_PROFILES); IPR027417 (SUPERFAMILY)	tr|A8JIJ1|A8JIJ1_CHLRE	Subunit of exon junction complex	0	tr|D8TTL1|D8TTL1_VOLCA	0	scaffold2.g6983.t1	4e-152	scaffold37_size123908	9e-46
I0YLG4_9CHLO	Alpha/beta-hydrolase	alpha beta-hydrolase	C:membrane; P:lipid metabolic process; F:hydrolase activity		IPR002921 (PFAM); IPR029058 (G3DSA:3.40.50.GENE3D); PTHR21493:SF135 (PANTHER); PTHR21493 (PANTHER); IPR029058 (SUPERFAMILY)	tr|A8J364|A8J364_CHLRE	Predicted protein (Fragment)	3e-45	tr|D8U7M5|D8U7M5_VOLCA	1e-23	scaffold2.g7031.t1	6e-32	scaffold4_size2474039	1e-13
I0YLG5_9CHLO	PIN domain-like protein	flap endonuclease 1 isoform X2	F:DNA binding; P:catabolic process; C:mitochondrion; F:nuclease activity; C:cytosol; P:biosynthetic process; C:nucleolus; P:DNA metabolic process; P:response to stress; C:nucleoplasm	EC:3.1.30; EC:3.1.21; EC:3.1	IPR006084 (PRINTS); IPR006086 (SMART); IPR008918 (SMART); IPR006085 (SMART); IPR029060 (G3DSA:3.40.50.GENE3D); G3DSA:1.10.150.20 (GENE3D); IPR006085 (PFAM); IPR006086 (PFAM); PTHR11081:SF9 (PANTHER); IPR006084 (PANTHER); IPR023426 (HAMAP); IPR020045 (SUPERFAMILY); IPR029060 (SUPERFAMILY)	sp|A8J2Z9|FEN1_CHLRE	Flap endonuclease 1	1e-176	tr|D8U423|D8U423_VOLCA	6e-174	scaffold2.g6878.t1	2e-149	scaffold2_size3998120	1e-13
I0YLG7_9CHLO	Exonuclease component of the exosome	exosome complex component rrp40	C:nucleus; F:RNA binding; C:cytoplasm; P:catabolic process; F:nuclease activity	EC:3.1	IPR004088 (PFAM); IPR026699 (PANTHER); IPR004088 (SUPERFAMILY); SSF110324 (SUPERFAMILY); IPR012340 (SUPERFAMILY)	tr|A8I6W9|A8I6W9_CHLRE	3'-5' exonuclease component of the exosome	6e-92	tr|D8TY61|D8TY61_VOLCA	2e-83	scaffold2.g7047.t1	2e-72	scaffold2_size3998120	3e-23
I0YLG8_9CHLO	Pkinase-domain-containing protein	Pkinase-domain-containing partial	F:nucleotide binding; P:signal transduction; P:cellular protein modification process; F:kinase activity; C:intracellular	EC:2.7.11	IPR000719 (SMART); G3DSA:3.30.200.20 (GENE3D); G3DSA:1.10.510.10 (GENE3D); IPR000719 (PFAM); IPR011992 (G3DSA:1.10.238.GENE3D); PTHR24349:SF84 (PANTHER); PTHR24349 (PANTHER); IPR000719 (PROSITE_PROFILES); IPR011992 (SUPERFAMILY); IPR011009 (SUPERFAMILY)	tr|A8J5F2|A8J5F2_CHLRE	Predicted protein (Fragment)	3e-147	tr|D8U4E1|D8U4E1_VOLCA	1e-155	scaffold3.g6333.t1	6e-150	scaffold3_size2545224	5e-30
I0YLH8_9CHLO	Starch branching enzyme	starch branching enzyme	P:carbohydrate metabolic process; P:generation of precursor metabolites and energy; P:biosynthetic process; F:transferase activity; F:binding; F:hydrolase activity	EC:2.4.1.18	IPR006047 (SMART); IPR004193 (PFAM); IPR006047 (PFAM); IPR013780 (G3DSA:2.60.40.GENE3D); IPR006048 (PFAM); IPR013783 (G3DSA:2.60.40.GENE3D); IPR013781 (G3DSA:3.20.20.GENE3D); PTHR10357:SF141 (PANTHER); IPR015902 (PANTHER); IPR014756 (SUPERFAMILY); IPR017853 (SUPERFAMILY); SSF51011 (SUPERFAMILY)	tr|A8IHX1|A8IHX1_CHLRE	Starch branching enzyme	0	tr|D8TIE8|D8TIE8_VOLCA	0	scaffold6.g2904.t1	0	scaffold6_size1922994	2e-14
I0YLH9_9CHLO	UBC-like protein (Fragment)	baculoviral IAP repeat-containing 6- partial	C:cytoplasm; P:signal transduction; P:cellular protein modification process; F:transferase activity		SM00212 (SMART); IPR016135 (G3DSA:3.10.110.GENE3D); IPR000608 (PFAM); PTHR10044:SF120 (PANTHER); PTHR10044 (PANTHER); IPR000608 (PROSITE_PROFILES); IPR016135 (SUPERFAMILY)	tr|A8IKM3|A8IKM3_CHLRE	Ubiquitin conjugating enzyme family protein	3e-42	tr|D8TP82|D8TP82_VOLCA	6e-38	scaffold27.g5986.t1	4e-45	scaffold27_size312300	2e-13
I0YLI0_9CHLO	Chloride channel protein	chloride Carrier Channel family	C:membrane; F:transporter activity		IPR001807 (PRINTS); IPR000644 (SMART); IPR003347 (SMART); G3DSA:2.60.120.650 (GENE3D); PF13621 (PFAM); IPR001807 (PFAM); IPR014743 (G3DSA:1.10.3080.GENE3D); G3DSA:3.10.580.10 (GENE3D); PTHR11689:SF59 (PANTHER); PTHR11689 (PANTHER); IPR003347 (PROSITE_PROFILES); IPR000644 (PROSITE_PROFILES); SSF51197 (SUPERFAMILY); SSF54631 (SUPERFAMILY); IPR014743 (SUPERFAMILY)	tr|A8HSY5|A8HSY5_CHLRE	Chloride channel protein	2e-67	tr|D8TSD4|D8TSD4_VOLCA	1e-53	scaffold14.g1101.t1	8e-48
I0YLI1_9CHLO	R-SNARE protein, VAMP72-family	R-SNARE VAMP72-family	F:protein binding; C:cytoplasm; C:membrane; P:cellular component organization; P:transport		IPR001388 (PRINTS); IPR010908 (SMART); IPR010908 (PFAM); IPR001388 (G3DSA:1.10.3840.GENE3D); IPR001388 (PFAM); IPR010908 (G3DSA:3.30.450.GENE3D); PTHR21136:SF73 (PANTHER); PTHR21136 (PANTHER); IPR001388 (PROSITE_PROFILES); IPR010908 (PROSITE_PROFILES); IPR011012 (SUPERFAMILY); SSF58038 (SUPERFAMILY)	tr|A8IT75|A8IT75_CHLRE	R-SNARE protein, VAMP72-family	5e-108	tr|D8UK66|D8UK66_VOLCA	5e-99	scaffold5.g620.t1	2e-98	scaffold5_size2028652	3e-16
I0YLI2_9CHLO	Uridine kinase	uridine kinase 3	F:nucleotide binding; C:cytosol; P:biosynthetic process; F:kinase activity; P:nucleobase-containing compound metabolic process	EC:2.7.1.48	IPR000764 (PRINTS); IPR029057 (PFAM); IPR029057 (G3DSA:3.40.50.GENE3D); IPR006083 (PFAM); IPR000764 (TIGRFAM); IPR027417 (G3DSA:3.40.50.GENE3D); PTHR10285 (PANTHER); PTHR10285:SF70 (PANTHER); IPR029057 (SUPERFAMILY); IPR027417 (SUPERFAMILY)	tr|A8IS13|A8IS13_CHLRE	Uridine kinase	0	tr|D8TT13|D8TT13_VOLCA	0	scaffold1.g5348.t1	0	scaffold1_size3450625	7e-29
I0YLI3_9CHLO	Acid protease	acid protease	P:protein metabolic process; F:hydrolase activity	EC:3.4.23	IPR001461 (PRINTS); IPR021109 (G3DSA:2.40.70.GENE3D); IPR021109 (G3DSA:2.40.70.GENE3D); IPR033121 (PFAM); PTHR13683:SF249 (PANTHER); IPR001461 (PANTHER); IPR033121 (PROSITE_PROFILES); IPR021109 (SUPERFAMILY)	tr|A8IT96|A8IT96_CHLRE	Pepsin-type aspartyl protease	3e-46	tr|D8TZV5|D8TZV5_VOLCA	2e-45	scaffold5.g693.t1	2e-33	scaffold5_size2028652	6e-06
I0YLI5_9CHLO	Thioredoxin	thiol reductase thioredoxin	C:cell; P:cellular homeostasis; F:catalytic activity; P:metabolic process		PR00421 (PRINTS); IPR005746 (PIRSF); IPR012336 (G3DSA:3.40.30.GENE3D); IPR005746 (TIGRFAM); IPR013766 (PFAM); IPR005746 (PANTHER); PTHR10438:SF280 (PANTHER); IPR013766 (PROSITE_PROFILES); IPR012336 (SUPERFAMILY)	tr|Q84XS2|Q84XS2_CHLRE	Thioredoxin y	2e-34	tr|D8TRR1|D8TRR1_VOLCA	1e-36	scaffold26.g3345.t1	1e-26	scaffold14_size1568905	1e-16
I0YLI8_9CHLO	HAD-like protein	haloacid dehalogenase-like hydrolase domain-containing At4g39970	P:metabolic process; C:plastid; F:hydrolase activity		IPR006439 (PRINTS); IPR023214 (PFAM); IPR006439 (TIGRFAM); IPR023214 (G3DSA:3.40.50.GENE3D); PTHR18901:SF30 (PANTHER); PTHR18901 (PANTHER); IPR023214 (SUPERFAMILY)	tr|A8J8H2|A8J8H2_CHLRE	Predicted protein	1e-121	tr|D8U7B6|D8U7B6_VOLCA	5e-121	scaffold2.g7221.t1	2e-103	scaffold2_size3998120	3e-21
I0YLJ0_9CHLO	Uncharacterized protein	hypothetical protein COCSUDRAFT_67818			no IPS match	tr|A8HTB0|A8HTB0_CHLRE	Predicted protein	2e-22	tr|D8UCQ1|D8UCQ1_VOLCA	8e-25
I0YLJ1_9CHLO	ATP synthase subunit beta	ATP synthase beta mitochondrial precursor	F:nucleotide binding; C:membrane; C:mitochondrion; P:biosynthetic process; P:nucleobase-containing compound metabolic process; F:transporter activity; F:hydrolase activity	EC:3.6.1; EC:3.6.1.3; EC:3.6.1.15	IPR003593 (SMART); PIRSF039072 (PIRSF); IPR004100 (PFAM); IPR024034 (G3DSA:1.10.1140.GENE3D); G3DSA:2.40.10.170 (GENE3D); IPR005722 (TIGRFAM); IPR027417 (G3DSA:3.40.50.GENE3D); IPR000194 (PFAM); PTHR15184:SF8 (PANTHER); PTHR15184 (PANTHER); IPR005722 (HAMAP); IPR004100 (SUPERFAMILY); IPR000793 (SUPERFAMILY); IPR027417 (SUPERFAMILY)	tr|A8IQU3|A8IQU3_CHLRE	ATP synthase subunit beta	0	tr|D8TRA2|D8TRA2_VOLCA	0	scaffold36.g5067.t1	2e-138	scaffold41_size205970	0
I0YLJ5_9CHLO	Uncharacterized protein	furry homolog-like	F:binding		IPR029473 (PFAM); IPR025614 (PFAM); IPR025481 (PFAM); PTHR12295 (PANTHER); IPR016024 (SUPERFAMILY)	tr|A8IQ02|A8IQ02_CHLRE	Predicted protein (Fragment)	4e-105	tr|D8TTH8|D8TTH8_VOLCA	4e-89	scaffold36.g5076.t1	3e-176	scaffold36_size124878	2e-15
I0YLJ6_9CHLO	Uncharacterized protein	hypothetical protein COCSUDRAFT_58561	C:membrane; C:integral component of membrane		IPR013830 (G3DSA:3.40.50.GENE3D); PTHR34407 (PANTHER); IPR013830 (SUPERFAMILY)	tr|A8JHF5|A8JHF5_CHLRE	Predicted protein	1e-45	tr|D8UDF3|D8UDF3_VOLCA	2e-46	scaffold17.g470.t1	4e-46	scaffold9_size1652423	3e-11
I0YLJ8_9CHLO	Carbonic anhydrase	carbonic anhydrase	F:catalytic activity		IPR001148 (SMART); IPR001148 (G3DSA:3.10.200.GENE3D); IPR001148 (PFAM); IPR023561 (PANTHER); PTHR18952:SF86 (PANTHER); IPR001148 (PROSITE_PROFILES); IPR001148 (SUPERFAMILY)	tr|A8IT01|A8IT01_CHLRE	Carbonic anhydrase	1e-17	tr|D8ULP0|D8ULP0_VOLCA	2e-18	scaffold1.g5775.t1	5e-11
I0YLK0_9CHLO	Uncharacterized protein	Translation initiation factor eIF-2B subunit epsilon	F:protein binding; P:biosynthetic process; F:transferase activity		IPR003307 (SMART); IPR029044 (G3DSA:3.90.550.GENE3D); G3DSA:2.160.10.10 (GENE3D); IPR001451 (PFAM); IPR003307 (PFAM); IPR005835 (PFAM); IPR016021 (G3DSA:1.25.40.GENE3D); PTHR22572:SF7 (PANTHER); PTHR22572 (PANTHER); IPR003307 (PROSITE_PROFILES); IPR016024 (SUPERFAMILY); IPR029044 (SUPERFAMILY)	tr|A8J5B2|A8J5B2_CHLRE	Predicted protein	2e-87	tr|D8TNG2|D8TNG2_VOLCA	2e-85	scaffold8.g1611.t1	2e-166	scaffold2_size3998120	1e-23
I0YLK1_9CHLO	DnaJ-domain-containing protein	chaperone dnaJ 15			IPR001623 (PRINTS); IPR001623 (SMART); IPR001623 (G3DSA:1.10.287.GENE3D); IPR001623 (PFAM); PTHR24078 (PANTHER); IPR001623 (PROSITE_PROFILES); IPR001623 (SUPERFAMILY)	tr|A8IYI9|A8IYI9_CHLRE	DnaJ-like protein	5e-15	tr|D8TPJ7|D8TPJ7_VOLCA	1e-14	scaffold12.g7941.t1	3e-14	scaffold12_size2011427	4e-11
I0YLK2_9CHLO	Metallophosphoesterase (Fragment)	metallophosphoesterase	F:hydrolase activity		IPR004843 (PFAM); IPR029052 (G3DSA:3.60.21.GENE3D); IPR027629 (TIGRFAM); PTHR35769:SF2 (PANTHER); PTHR35769 (PANTHER); IPR029052 (SUPERFAMILY)	tr|A8J6X0|A8J6X0_CHLRE	Metallophosphoesterase (Fragment)	7e-76	tr|D8TT39|D8TT39_VOLCA	1e-69	scaffold5.g635.t1	1e-58	scaffold5_size2028652	5e-13
I0YLK3_9CHLO	Succinyl-CoA ligase alpha chain	succinyl- ligase [ADP-forming] subunit alpha- mitochondrial	P:generation of precursor metabolites and energy; F:catalytic activity; C:mitochondrion; C:cytosol; P:biosynthetic process; F:binding; P:nucleobase-containing compound metabolic process	EC:6.2.1.5; EC:6.2.1.4; EC:6.2.1	PR01798 (PRINTS); IPR003781 (SMART); IPR005810 (PIRSF); IPR005810 (TIGRFAM); IPR003781 (PFAM); IPR016102 (G3DSA:3.40.50.GENE3D); IPR016040 (G3DSA:3.40.50.GENE3D); IPR005811 (PFAM); PTHR11117 (PANTHER); IPR016040 (SUPERFAMILY); IPR016102 (SUPERFAMILY)	tr|A8IWJ8|A8IWJ8_CHLRE	Succinyl-CoA ligase	6e-173	tr|D8UF19|D8UF19_VOLCA	1e-175	scaffold5.g623.t1	9e-148	scaffold5_size2028652	5e-19
I0YLK5_9CHLO	Isopentenyl transferase (Fragment)	tRNA dimethylallyltransferase 9	F:nucleotide binding; F:transferase activity; P:nucleobase-containing compound metabolic process		G3DSA:1.10.287.890 (GENE3D); IPR027417 (G3DSA:3.40.50.GENE3D); IPR018022 (PFAM); IPR018022 (TIGRFAM); PTHR11088:SF31 (PANTHER); PTHR11088 (PANTHER); IPR018022 (HAMAP); IPR027417 (SUPERFAMILY)	tr|A8JIF8|A8JIF8_CHLRE	Predicted protein (Fragment)	6e-35	tr|D8TTA6|D8TTA6_VOLCA	8e-75	scaffold5.g641.t1	1e-83	scaffold37_size123908	2e-31
I0YLK6_9CHLO	DNA/RNA polymerase (Fragment)	DNA polymerase eta	F:DNA binding; P:DNA metabolic process; P:response to stress		IPR017961 (G3DSA:3.30.1490.GENE3D); IPR001126 (PFAM); IPR017961 (PFAM); G3DSA:3.30.70.270 (GENE3D); G3DSA:1.10.150.20 (GENE3D); PTHR11076:SF11 (PANTHER); PTHR11076 (PANTHER); IPR001126 (PROSITE_PROFILES); IPR017961 (SUPERFAMILY); SSF56672 (SUPERFAMILY)	tr|A8JCD8|A8JCD8_CHLRE	DNA polymerase eta/iota	5e-28	tr|D8TNB1|D8TNB1_VOLCA	3e-67	scaffold13.g328.t1	6e-34	scaffold13_size1291228	4e-07
I0YLK7_9CHLO	Ferredoxin	chloroplast precursor	P:generation of precursor metabolites and energy; F:binding		IPR010241 (TIGRFAM); IPR012675 (G3DSA:3.10.20.GENE3D); IPR001041 (PFAM); PTHR19370:SF110 (PANTHER); PTHR19370 (PANTHER); IPR001041 (PROSITE_PROFILES); IPR001041 (SUPERFAMILY)	tr|A8IV40|A8IV40_CHLRE	Apoferredoxin	9e-37	tr|D8U0Z8|D8U0Z8_VOLCA	8e-40	scaffold7.g3401.t1	3e-35
I0YLL3_9CHLO	Hydrolase, carbon-nitrogen family	N-carbamoylputrescine amidase	P:biosynthetic process; P:cellular process; F:hydrolase activity	EC:3.5.1.53	IPR003010 (G3DSA:3.60.110.GENE3D); IPR003010 (PFAM); PTHR23088:SF26 (PANTHER); PTHR23088 (PANTHER); IPR003010 (PROSITE_PROFILES); IPR003010 (SUPERFAMILY)	tr|A8IVK4|A8IVK4_CHLRE	N-carbamoylputrescine amidase	5e-107	tr|D8TWN7|D8TWN7_VOLCA	4e-115	scaffold9.g3255.t1	5e-86	scaffold9_size1652423	2e-17
I0YLL7_9CHLO	Putative carbon-nitrogen family hydrolase putative	N-carbamoylputrescine amidase	P:biosynthetic process; P:cellular process; F:hydrolase activity	EC:3.5.1.53	IPR003010 (G3DSA:3.60.110.GENE3D); IPR017755 (TIGRFAM); IPR003010 (PFAM); PTHR23088 (PANTHER); PTHR23088:SF26 (PANTHER); IPR003010 (PROSITE_PROFILES); IPR003010 (SUPERFAMILY)	tr|A8IVK4|A8IVK4_CHLRE	N-carbamoylputrescine amidase	1e-117	tr|D8TWN7|D8TWN7_VOLCA	7e-133	scaffold9.g3255.t1	6e-99	scaffold9_size1652423	2e-17
I0YLL9_9CHLO	Sure-like protein	sure-like protein	F:hydrolase activity		IPR002828 (TIGRFAM); IPR002828 (PFAM); IPR002828 (G3DSA:3.40.1210.GENE3D); PTHR30457 (PANTHER); PTHR30457:SF0 (PANTHER); IPR002828 (SUPERFAMILY)	tr|A8IGE2|A8IGE2_CHLRE	Predicted protein (Fragment)	3e-14	tr|D8TJE9|D8TJE9_VOLCA	7e-13
I0YLM0_9CHLO	Uncharacterized protein	Multidrug resistance-associated 4	F:nucleotide binding; C:membrane; F:transporter activity; F:hydrolase activity	EC:3.6.1; EC:3.6.1.3; EC:3.6.1.15	G3DSA:1.20.1560.10 (GENE3D); IPR011527 (PFAM); PTHR24223:SF252 (PANTHER); PTHR24223 (PANTHER); IPR011527 (PROSITE_PROFILES); IPR011527 (SUPERFAMILY)	tr|A8JGZ5|A8JGZ5_CHLRE	Predicted protein (Fragment)	2e-46	tr|D8UGN0|D8UGN0_VOLCA	7e-20	scaffold15.g4200.t1	4e-36	scaffold15_size880018	2e-08
I0YLM1_9CHLO	P-loop containing nucleoside triphosphate hydrolase protein (Fragment)	multidrug resistance-associated 9 isoform X3	F:nucleotide binding; C:membrane; F:transporter activity; F:hydrolase activity	EC:3.6.1; EC:3.6.1.3; EC:3.6.1.15	IPR003593 (SMART); G3DSA:1.20.1560.10 (GENE3D); IPR027417 (G3DSA:3.40.50.GENE3D); IPR011527 (PFAM); IPR003439 (PFAM); PTHR24223 (PANTHER); IPR003439 (PROSITE_PROFILES); IPR011527 (PROSITE_PROFILES); IPR011527 (SUPERFAMILY); IPR027417 (SUPERFAMILY); IPR027417 (SUPERFAMILY)	tr|A8HRK2|A8HRK2_CHLRE	ABC transporter, multidrug resistance associated protein (Fragment)	5e-160	tr|D8TY67|D8TY67_VOLCA	0	scaffold15.g4200.t1	0	scaffold15_size880018	8e-62
I0YLM2_9CHLO	Heat shock protein 33 (Fragment)	heat shock partial	F:protein binding; C:cytoplasm; P:cellular process		IPR000397 (PIRSF); IPR000397 (PFAM); IPR016153 (G3DSA:3.55.30.GENE3D); IPR016154 (G3DSA:3.90.1280.GENE3D); PTHR30111 (PANTHER); PTHR30111:SF1 (PANTHER); IPR016154 (SUPERFAMILY); IPR016153 (SUPERFAMILY)	tr|Q944P3|Q944P3_CHLRE	Heat shock protein 33	3e-119	tr|D8U253|D8U253_VOLCA	2e-120	scaffold5.g602.t1	4e-131	scaffold5_size2028652	3e-20
I0YLM4_9CHLO	P-loop containing nucleoside triphosphate hydrolase protein	ABC transporter I family member 21-like	F:nucleotide binding; F:hydrolase activity	EC:3.6.1; EC:3.6.1.3; EC:3.6.1.15	IPR003593 (SMART); IPR027417 (G3DSA:3.40.50.GENE3D); IPR003439 (PFAM); PTHR12847:SF6 (PANTHER); PTHR12847 (PANTHER); IPR003439 (PROSITE_PROFILES); IPR027417 (SUPERFAMILY)	tr|A8HTT9|A8HTT9_CHLRE	Predicted protein	8e-121	tr|D8TR15|D8TR15_VOLCA	1e-119	scaffold5.g629.t1	2e-83	scaffold5_size2028652	5e-18
I0YLM8_9CHLO	ArfGap-domain-containing protein (Fragment)	probable ADP-ribosylation factor GTPase-activating AGD9	F:enzyme regulator activity		IPR001164 (PRINTS); IPR001164 (SMART); IPR001164 (PFAM); PTHR23180:SF16 (PANTHER); PTHR23180 (PANTHER); IPR001164 (PROSITE_PROFILES); SSF57863 (SUPERFAMILY)	tr|A8JDA5|A8JDA5_CHLRE	Predicted protein (Fragment)	3e-71	tr|D8TYH6|D8TYH6_VOLCA	8e-70	scaffold36.g5063.t1	5e-64	scaffold36_size124878	1e-29
I0YLN2_9CHLO	Uncharacterized protein	SKP1 21	P:protein metabolic process; P:catabolic process; P:cellular process		IPR001232 (SMART); IPR016072 (PFAM); G3DSA:3.30.710.10 (GENE3D); PTHR11165:SF62 (PANTHER); PTHR11165 (PANTHER); IPR016072 (SUPERFAMILY)	tr|A8IJ79|A8IJ79_CHLRE	E3 ubiquitin ligase	4e-14	tr|D8TNK5|D8TNK5_VOLCA	1e-15	scaffold36.g5072.t1	1e-51	scaffold36_size124878	9e-09
I0YLN3_9CHLO	Nucleotide-binding domain-containing protein	nucleotide-binding domain-containing	F:catalytic activity; P:metabolic process; F:binding		PR00368 (PRINTS); IPR023753 (G3DSA:3.50.50.GENE3D); IPR023753 (G3DSA:3.50.50.GENE3D); IPR023753 (PFAM); IPR002048 (PROSITE_PROFILES); IPR023753 (SUPERFAMILY); IPR023753 (SUPERFAMILY)	tr|A8JI60|A8JI60_CHLRE	Type-II calcium-dependent NADH dehydrogenase	0	tr|D8U989|D8U989_VOLCA	9e-110	scaffold6.g2727.t1	9e-93	scaffold53_size51945	1e-09
I0YLN6_9CHLO	Uncharacterized protein	chloroplastic isoform X2	C:membrane; C:plastid		IPR031610 (PFAM); IPR031610 (PANTHER)	tr|A8I023|A8I023_CHLRE	110 kDa translocon of chloroplast envelope inner membrane (Fragment)	2e-62	tr|D8UFD3|D8UFD3_VOLCA	0	scaffold30.g4420.t1	2e-52	scaffold30_size250005	4e-07
I0YLN7_9CHLO	Uncharacterized protein	caltractin (ISS)	C:membrane; F:binding		IPR002048 (SMART); IPR011992 (G3DSA:1.10.238.GENE3D); IPR002048 (PFAM); IPR002048 (PROSITE_PROFILES); IPR011992 (SUPERFAMILY)	tr|A8HPL4|A8HPL4_CHLRE	Predicted protein	1e-62	tr|D8UDD2|D8UDD2_VOLCA	9e-57	scaffold30.g4440.t1	5e-43
I0YLN8_9CHLO	Uncharacterized protein	family 69 glycosyltransferase	C:membrane		IPR021047 (PFAM); PTHR34144 (PANTHER); PTHR34144:SF5 (PANTHER)	tr|A8IVW7|A8IVW7_CHLRE	Predicted protein (Fragment)	7e-60	tr|D8TL78|D8TL78_VOLCA	4e-65
I0YLP0_9CHLO	Uncharacterized protein	cytokinin riboside 5 -monophosphate phosphoribohydrolase LOG8	C:nucleus; C:cytosol; P:biosynthetic process; P:cellular process; F:hydrolase activity		G3DSA:3.40.50.450 (GENE3D); IPR031100 (PFAM); IPR005269 (TIGRFAM); PTHR31223 (PANTHER); SSF102405 (SUPERFAMILY)	tr|A8ITR2|A8ITR2_CHLRE	Predicted protein (Fragment)	3e-77	tr|D8TZI7|D8TZI7_VOLCA	3e-78	scaffold1.g5639.t1	6e-38	scaffold1_size3450625	2e-22
I0YLP3_9CHLO	Ankyrin	ankyrin-3-like isoform X1	F:protein binding		IPR002110 (SMART); IPR020683 (G3DSA:1.25.40.GENE3D); IPR020683 (PFAM); PTHR24198 (PANTHER); IPR002110 (PROSITE_PROFILES); IPR020683 (PROSITE_PROFILES); IPR020683 (SUPERFAMILY)	tr|A8I5J0|A8I5J0_CHLRE	Predicted protein (Fragment)	5e-13	tr|D8U111|D8U111_VOLCA	7e-15	scaffold18.g1939.t1	2e-11
I0YLP5_9CHLO	Cytochrome P450	cytochrome P450	F:catalytic activity; P:metabolic process; F:binding		IPR002401 (PRINTS); IPR001128 (G3DSA:1.10.630.GENE3D); IPR001128 (PFAM); PTHR24305 (PANTHER); IPR001128 (SUPERFAMILY)	tr|A8IG04|A8IG04_CHLRE	Cytochrome P450	5e-36	tr|D8UBI0|D8UBI0_VOLCA	4e-40	scaffold1.g5422.t1	3e-72	scaffold1_size3450625	4e-08
I0YLP7_9CHLO	Uncharacterized protein	transcription factor MYB44-like	F:DNA binding		IPR001005 (SMART); IPR009057 (G3DSA:1.10.10.GENE3D); IPR009057 (G3DSA:1.10.10.GENE3D); IPR001005 (PFAM); PTHR10641 (PANTHER); IPR017930 (PROSITE_PROFILES); IPR009057 (SUPERFAMILY)	tr|A8J0K3|A8J0K3_CHLRE	Predicted protein (Fragment)	6e-31	tr|D8TH00|D8TH00_VOLCA	2e-32	scaffold15.g4283.t1	2e-33	scaffold18_size793176	5e-19
I0YLP9_9CHLO	TBPIP-domain-containing protein	homologous-pairing 2 homolog			IPR010776 (PFAM); IPR010776 (PANTHER)	tr|A8J273|A8J273_CHLRE	Predicted protein	6e-31	tr|D8U9K9|D8U9K9_VOLCA	1e-36	scaffold36.g5064.t1	2e-20
I0YLQ0_9CHLO	DnaJ-domain-containing protein	molecular chaperone	F:protein binding; P:cellular process		IPR001623 (PRINTS); IPR001623 (SMART); IPR001623 (G3DSA:1.10.287.GENE3D); IPR001623 (PFAM); PTHR24078 (PANTHER); IPR001623 (PROSITE_PROFILES); IPR001623 (SUPERFAMILY)	tr|A8J1Y6|A8J1Y6_CHLRE	Predicted protein	6e-24	tr|D8TGV9|D8TGV9_VOLCA	1e-18	scaffold14.g1330.t1	3e-95	scaffold14_size1568905	9e-08
I0YLQ1_9CHLO	Uncharacterized protein	dnaJ ERDJ2A	F:protein binding; C:membrane		IPR001623 (PRINTS); IPR001623 (SMART); IPR004179 (SMART); IPR001623 (PFAM); G3DSA:1.10.3380.10 (GENE3D); G3DSA:1.10.150.20 (GENE3D); IPR001623 (G3DSA:1.10.287.GENE3D); IPR000008 (G3DSA:2.60.40.GENE3D); IPR004179 (PFAM); PTHR24075:SF0 (PANTHER); PTHR24075 (PANTHER); IPR001623 (PROSITE_PROFILES); IPR014756 (SUPERFAMILY); SSF158702 (SUPERFAMILY); IPR001623 (SUPERFAMILY)	tr|A8J8J1|A8J8J1_CHLRE	ER-targeted preprotein translocase subunit	6e-170	tr|D8U7D8|D8U7D8_VOLCA	0	scaffold5.g703.t1	9e-123	scaffold5_size2028652	8e-15
I0YLQ2_9CHLO	DUF171-domain-containing protein (Fragment)	methyltransferase C9orf114			IPR003750 (PFAM); IPR029026 (G3DSA:3.40.1280.GENE3D); IPR003750 (PANTHER); PTHR12150:SF13 (PANTHER); IPR029028 (SUPERFAMILY); IPR012340 (SUPERFAMILY)	tr|A8JBE3|A8JBE3_CHLRE	Predicted protein	1e-60	tr|D8U135|D8U135_VOLCA	2e-31	scaffold11.g3984.t1	5e-82	scaffold11_size1415723	2e-14
I0YLQ4_9CHLO	S-adenosyl-L-methionine-dependent methyltransferase	S-adenosyl-L-methionine-dependent methyltransferase	P:response to external stimulus; P:post-embryonic development; P:cellular component organization; P:cell differentiation; C:cytosol; P:anatomical structure morphogenesis; P:biosynthetic process; F:transferase activity; P:pollination; P:cell growth	EC:2.1.1; EC:2.1.1.103	IPR029063 (G3DSA:3.40.50.GENE3D); IPR013216 (PFAM); IPR029063 (G3DSA:3.40.50.GENE3D); PF13489 (PFAM); PTHR10108:SF793 (PANTHER); PTHR10108 (PANTHER); IPR029063 (SUPERFAMILY); IPR029063 (SUPERFAMILY)	tr|Q6WEE4|Q6WEE4_CHLRE	Cyanobacterial-type MPBQ/MSBQ methyltransferase	9e-16	tr|D8U178|D8U178_VOLCA	5e-15	scaffold27.g5982.t1	0	scaffold27_size312300	7e-52
I0YLQ5_9CHLO	alpha-1,2-Mannosidase	probable alpha-mannosidase I MNS5	P:carbohydrate metabolic process; C:membrane; F:binding; F:hydrolase activity	EC:3.2.1.113; EC:3.2.1.24; EC:3.2.1	IPR001382 (PRINTS); IPR001382 (G3DSA:1.50.10.GENE3D); IPR001382 (PFAM); PTHR11742:SF44 (PANTHER); PTHR11742 (PANTHER); IPR001382 (SUPERFAMILY)	tr|A8JCH8|A8JCH8_CHLRE	alpha-1,2-Mannosidase	4e-17	tr|D8TTX5|D8TTX5_VOLCA	3e-18	scaffold18.g1933.t1	5e-79	scaffold18_size793176	3e-12
I0YLQ6_9CHLO	Heat shock protein Hsp90	heat shock Hsp90	F:nucleotide binding; F:protein binding; P:cellular process; P:response to stress		IPR020575 (PRINTS); IPR001404 (PIRSF); IPR003594 (SMART); IPR003594 (G3DSA:3.30.565.GENE3D); IPR003594 (PFAM); IPR001404 (PFAM); IPR001404 (PANTHER); IPR001404 (HAMAP); IPR003594 (SUPERFAMILY); IPR020568 (SUPERFAMILY); SSF110942 (SUPERFAMILY)	tr|Q66T67|Q66T67_CHLRE	Heat shock protein 90C	0	tr|D8TNS2|D8TNS2_VOLCA	0	scaffold12.g8257.t1	0	scaffold1_size3450625	1e-14
I0YLQ8_9CHLO	Rhomboid-like protein	rhomboid-like protease	P:protein metabolic process; C:membrane; F:hydrolase activity	EC:3.4.21	IPR022764 (PFAM); IPR022764 (G3DSA:1.20.1540.GENE3D); IPR002610 (PANTHER); PTHR22936:SF4 (PANTHER); SSF144091 (SUPERFAMILY)	tr|A8J380|A8J380_CHLRE	Rhomboid-like protein	2e-28	tr|D8TVA4|D8TVA4_VOLCA	1e-59	scaffold5.g606.t1	1e-71	scaffold5_size2028652	6e-55
I0YLQ9_9CHLO	Uncharacterized protein	conserved oligomeric Golgi complex subunit 7	C:cytoplasm; C:Golgi apparatus; P:transport		IPR019335 (PFAM); IPR019335 (PANTHER)	tr|A8I8P0|A8I8P0_CHLRE	Component of oligomeric golgi complex 7	3e-82	tr|D8U4R6|D8U4R6_VOLCA	4e-97	scaffold12.g7905.t1	9e-20	scaffold12_size2011427	5e-17
I0YLR1_9CHLO	Mg-dependent DNase	deoxyribonuclease TATDN1	P:catabolic process; F:nuclease activity; P:DNA metabolic process	EC:3.1.30; EC:3.1.21; EC:3.1	IPR001130 (PIRSF); G3DSA:3.20.20.140 (GENE3D); IPR001130 (PFAM); PTHR10060:SF15 (PANTHER); IPR001130 (PANTHER); IPR032466 (SUPERFAMILY)	tr|A8I8J2|A8I8J2_CHLRE	Predicted protein	1e-118	tr|D8TM06|D8TM06_VOLCA	4e-102	scaffold5.g630.t1	3e-125	scaffold5_size2028652	2e-14
I0YLR2_9CHLO	Uncharacterized protein (Fragment)	Strawberry notch 1	P:biosynthetic process; P:nucleobase-containing compound metabolic process		IPR027417 (G3DSA:3.40.50.GENE3D); IPR026937 (PFAM); PF13872 (PFAM); IPR026741 (PANTHER); PTHR12706:SF13 (PANTHER); IPR027417 (SUPERFAMILY)	tr|A8IU58|A8IU58_CHLRE	Predicted protein	5e-118	tr|D8TR47|D8TR47_VOLCA	3e-145	scaffold1.g5574.t1	9e-120	scaffold1_size3450625	1e-18
I0YLR3_9CHLO	Uncharacterized protein	sulfite exporter family	C:membrane		IPR002781 (PFAM); PTHR14255 (PANTHER); PTHR14255:SF3 (PANTHER)	tr|A8J8K2|A8J8K2_CHLRE	Predicted protein (Fragment)	8e-15	tr|D8TR85|D8TR85_VOLCA	7e-24	scaffold7.g3711.t1	1e-30
I0YLR8_9CHLO	Putative aspartic protease	aspartic ase oryzasin-1-like	P:protein metabolic process; C:cytoplasm; P:catabolic process; P:lipid metabolic process; F:hydrolase activity	EC:3.4.23	IPR001461 (PRINTS); IPR011001 (G3DSA:1.10.225.GENE3D); IPR021109 (G3DSA:2.40.70.GENE3D); IPR021109 (G3DSA:2.40.70.GENE3D); IPR033121 (PFAM); IPR008138 (PFAM); IPR011001 (G3DSA:1.10.225.GENE3D); IPR007856 (PFAM); PTHR13683:SF286 (PANTHER); IPR001461 (PANTHER); IPR008139 (PROSITE_PROFILES); IPR033121 (PROSITE_PROFILES); IPR011001 (SUPERFAMILY); IPR021109 (SUPERFAMILY)	tr|Q7XB41|Q7XB41_CHLRE	Aspartic proteinase	9e-129	tr|D8TZV5|D8TZV5_VOLCA	5e-130	scaffold5.g693.t1	2e-164	scaffold5_size2028652	9e-16
I0YLR9_9CHLO	Uncharacterized protein	psbP domain-containing chloroplastic	C:membrane; P:photosynthesis; F:binding; C:thylakoid		IPR002683 (PFAM); IPR016123 (G3DSA:3.40.1000.GENE3D); PTHR31407 (PANTHER); PTHR31407:SF17 (PANTHER); IPR016123 (SUPERFAMILY)	tr|A8HZ72|A8HZ72_CHLRE	Predicted protein	1e-43	tr|D8UBX9|D8UBX9_VOLCA	4e-29	scaffold5.g694.t1	8e-26
I0YLS0_9CHLO	Aldo/keto reductase	probable aldo-keto reductase 1	F:catalytic activity; P:metabolic process		IPR020471 (PRINTS); IPR023210 (G3DSA:3.20.20.GENE3D); IPR023210 (PFAM); IPR001395 (PANTHER); PTHR11732:SF12 (PANTHER); IPR023210 (SUPERFAMILY)	tr|A8JA38|A8JA38_CHLRE	Predicted protein	2e-82	tr|D8TMH4|D8TMH4_VOLCA	7e-87	scaffold3.g6471.t1	3e-57	scaffold4_size2474039	5e-17
I0YLS2_9CHLO	Uncharacterized protein	DNA-directed RNA polymerases and III subunit RPABC3	P:biosynthetic process; C:nucleolus; F:transferase activity; P:nucleobase-containing compound metabolic process; C:nucleoplasm	EC:2.7.7.6	IPR005570 (PIRSF); IPR005570 (SMART); G3DSA:2.40.50.140 (GENE3D); IPR005570 (PFAM); IPR005570 (PANTHER); IPR012340 (SUPERFAMILY)	tr|A8I4L4|A8I4L4_CHLRE	DNA-directed RNA polymerase II, 16.5 kDa polypeptide	3e-50	tr|D8U403|D8U403_VOLCA	4e-51	scaffold1.g5838.t1	6e-53	scaffold1_size3450625	3e-07
I0YLS5_9CHLO	Uncharacterized protein	L-arabinokinase-like	F:nucleotide binding; C:cytoplasm; F:kinase activity		IPR006206 (PRINTS); G3DSA:3.40.50.2000 (GENE3D); G3DSA:3.40.50.2000 (GENE3D); IPR006204 (PFAM); PF13528 (PFAM); IPR014721 (G3DSA:3.30.230.GENE3D); IPR013750 (G3DSA:3.30.70.GENE3D); PTHR10457:SF12 (PANTHER); IPR006206 (PANTHER); IPR013750 (SUPERFAMILY); IPR020568 (SUPERFAMILY); SSF53756 (SUPERFAMILY)	tr|A8IRI7|A8IRI7_CHLRE	Galactokinase-like protein	9e-137	tr|D8UGG2|D8UGG2_VOLCA	7e-11	scaffold5.g700.t1	8e-100	scaffold5_size2028652	3e-11
I0YLS6_9CHLO	NAD(P) dependent steroid dehydrogenase-like protein	sterol-4-alpha-carboxylate 3- decarboxylating	F:catalytic activity; C:membrane; P:lipid metabolic process; P:biosynthetic process; P:cellular process	EC:1.1.1; EC:1.1.1.145	IPR002225 (PFAM); IPR016040 (G3DSA:3.40.50.GENE3D); PTHR10366:SF242 (PANTHER); PTHR10366 (PANTHER); IPR016040 (SUPERFAMILY)	tr|A8J664|A8J664_CHLRE	Steroid dehydrogenase	6e-111	tr|D8TNW8|D8TNW8_VOLCA	5e-119	scaffold1.g5269.t1	1e-85	scaffold1_size3450625	3e-11
I0YLS7_9CHLO	NAP-domain-containing protein	NAP1-related 2	C:nucleus; P:cellular component organization		IPR002164 (PFAM); PTHR11875:SF49 (PANTHER); IPR002164 (PANTHER); SSF143113 (SUPERFAMILY)	tr|A8IMS6|A8IMS6_CHLRE	Nucleosome assembly protein	6e-37	tr|D8TKF8|D8TKF8_VOLCA	6e-43
I0YLT0_9CHLO	Alpha/beta-hydrolase (Fragment)	alpha beta- partial	F:hydrolase activity		IPR029058 (G3DSA:3.40.50.GENE3D); IPR019149 (PFAM); PTHR13617 (PANTHER); IPR029058 (SUPERFAMILY)	tr|A8IA34|A8IA34_CHLRE	Predicted protein	4e-37	tr|D8TMZ9|D8TMZ9_VOLCA	1e-88	scaffold1.g5866.t1	1e-65	scaffold1_size3450625	7e-09
I0YLT1_9CHLO	Class I glutamine amidotransferase-like protein	gamma-glutamyl hydrolase	P:protein metabolic process; F:transferase activity; C:vacuole; P:cellular process; F:hydrolase activity	EC:3.4.19.9; EC:3.4.19	IPR011697 (PFAM); IPR029062 (G3DSA:3.40.50.GENE3D); IPR015527 (PANTHER); IPR015527 (PROSITE_PROFILES); IPR029062 (SUPERFAMILY)	tr|A8I683|A8I683_CHLRE	Gamma-glutamyl hydrolase	2e-128	tr|D8U6J5|D8U6J5_VOLCA	2e-131	scaffold4.g5014.t1	1e-128	scaffold4_size2474039	4e-14
I0YLT4_9CHLO	Protein serine/threonine phosphatase 2C	kinase and PP2C-like domain-containing isoform X2	F:nucleotide binding; C:cell; P:cellular protein modification process; F:kinase activity; F:hydrolase activity	EC:3.1.3.16; EC:3.1; EC:3.1.3.41	IPR001932 (SMART); IPR000719 (SMART); IPR001932 (PFAM); G3DSA:1.10.510.10 (GENE3D); IPR000719 (PFAM); IPR001932 (G3DSA:3.60.40.GENE3D); IPR015655 (PANTHER); IPR001932 (PROSITE_PROFILES); IPR000719 (PROSITE_PROFILES); IPR001932 (SUPERFAMILY); IPR011009 (SUPERFAMILY)	tr|A8JDA0|A8JDA0_CHLRE	Protein phosphatase 2C-related protein (Fragment)	2e-108	tr|D8TRB4|D8TRB4_VOLCA	2e-50	scaffold30.g4465.t1	3e-53	scaffold30_size250005	7e-18
I0YLT5_9CHLO	Uncharacterized protein	zinc finger CCCH domain-containing 23-like	C:nucleus; F:DNA binding; F:transcription factor activity, sequence-specific DNA binding; F:RNA binding; C:cytoplasm; P:nucleobase-containing compound metabolic process; P:translation		IPR000571 (SMART); IPR000571 (PFAM); IPR000571 (G3DSA:4.10.1000.GENE3D); PTHR14493 (PANTHER); IPR000571 (PROSITE_PROFILES); IPR000571 (SUPERFAMILY)	tr|A8HRT5|A8HRT5_CHLRE	Predicted protein (Fragment)	1e-58	tr|D8TM77|D8TM77_VOLCA	6e-63	scaffold5.g688.t1	5e-57	scaffold2_size3998120	5e-30
I0YLU0_9CHLO	DSBA oxidoreductase	DSBA oxidoreductase	F:catalytic activity; P:metabolic process		IPR012336 (G3DSA:3.40.30.GENE3D); IPR001853 (PFAM); PTHR13887:SF10 (PANTHER); PTHR13887 (PANTHER); IPR012336 (SUPERFAMILY)	tr|A8IYM7|A8IYM7_CHLRE	Predicted protein	4e-31	tr|D8TRT0|D8TRT0_VOLCA	3e-63	scaffold3.g6442.t1	8e-16
I0YLU1_9CHLO	PspA/IM30	membrane-associated 30 kDa chloroplastic	C:membrane; P:cellular component organization; C:plastid; C:thylakoid		IPR007157 (PFAM); PTHR31088:SF6 (PANTHER); PTHR31088 (PANTHER)	tr|Q66YD0|Q66YD0_CHLRE	Chloroplast vesicle-inducing protein in plastids 1	3e-97	tr|D8TQZ1|D8TQZ1_VOLCA	8e-108	scaffold30.g4429.t1	3e-93	scaffold30_size250005	3e-07
I0YLU4_9CHLO	Iron hydrogenase	NAR1 isoform X1	P:response to oxygen levels; C:nucleus; C:cytosol		IPR003149 (SMART); G3DSA:3.40.950.10 (GENE3D); G3DSA:3.40.50.1780 (GENE3D); IPR004108 (PFAM); IPR003149 (G3DSA:4.10.260.GENE3D); IPR003149 (PFAM); PTHR11615:SF103 (PANTHER); PTHR11615 (PANTHER); IPR009016 (SUPERFAMILY)	tr|A8IXQ0|A8IXQ0_CHLRE	Iron hydrogenase/prelamin A binding protein (Fragment)	1e-150	tr|D8UBL6|D8UBL6_VOLCA	1e-134	scaffold5.g633.t1	4e-83	scaffold5_size2028652	6e-08
I0YLU5_9CHLO	Alpha/beta-hydrolase	alpha beta-hydrolase	P:biosynthetic process; F:hydrolase activity		IPR029058 (G3DSA:3.40.50.GENE3D); IPR001031 (PFAM); PTHR11487:SF0 (PANTHER); IPR012223 (PANTHER); IPR029058 (SUPERFAMILY)	tr|A8IZL8|A8IZL8_CHLRE	Predicted protein	2e-59	tr|D8U811|D8U811_VOLCA	4e-82	scaffold8.g1583.t1	2e-122	scaffold8_size1730130	8e-48
I0YLU6_9CHLO	Kinase-like protein	kinase	F:nucleotide binding; C:membrane; P:cellular protein modification process; F:kinase activity	EC:2.7.11	IPR000719 (SMART); IPR000719 (PFAM); G3DSA:1.10.510.10 (GENE3D); G3DSA:3.30.200.20 (GENE3D); PTHR23257 (PANTHER); IPR000719 (PROSITE_PROFILES); IPR011009 (SUPERFAMILY)	tr|A8JF93|A8JF93_CHLRE	Predicted protein (Fragment)	4e-50	tr|D8U0R0|D8U0R0_VOLCA	1e-46	scaffold4.g5032.t1	2e-46	scaffold2_size3998120	6e-11
I0YLU7_9CHLO	Uncharacterized protein	ATP synthase subunit delta mitochondrial	P:generation of precursor metabolites and energy; C:membrane; C:mitochondrion; P:biosynthetic process; P:nucleobase-containing compound metabolic process; F:transporter activity; F:hydrolase activity	EC:3.6.1; EC:3.6.1.3; EC:3.6.1.15	IPR020546 (G3DSA:2.60.15.GENE3D); IPR020546 (PFAM); IPR001469 (PANTHER); PTHR13822:SF7 (PANTHER); IPR020546 (PRODOM); IPR001469 (HAMAP); IPR020546 (SUPERFAMILY)	tr|A8J9X1|A8J9X1_CHLRE	Mitochondrial F1F0 ATP synthase, delta subunit	2e-36	tr|D8TMS1|D8TMS1_VOLCA	7e-41	scaffold9.g3161.t1	9e-89	scaffold9_size1652423	1e-16
I0YLU9_9CHLO	Aspartate aminotransferase	aspartate cytoplasmic	F:protein binding; P:biosynthetic process; F:transferase activity; P:cellular process	EC:2.6.1.9; EC:2.6.1.57; EC:2.6.1.5; EC:2.6.1.1	IPR000796 (PRINTS); IPR015421 (G3DSA:3.40.640.GENE3D); IPR004839 (PFAM); IPR000796 (PANTHER); IPR015424 (SUPERFAMILY)	tr|A8J129|A8J129_CHLRE	Aspartate aminotransferase	4e-175	tr|D8U7Y1|D8U7Y1_VOLCA	0	scaffold30.g4460.t1	1e-138	scaffold1_size3450625	1e-10
I0YLV0_9CHLO	Kinase-like protein	serine threonine- kinase A-Raf	F:nucleotide binding; P:cellular protein modification process; F:kinase activity		IPR001245 (PRINTS); IPR000719 (SMART); IPR000719 (PFAM); G3DSA:1.10.510.10 (GENE3D); PTHR23257 (PANTHER); IPR000719 (PROSITE_PROFILES); IPR011009 (SUPERFAMILY)	tr|A8ICZ0|A8ICZ0_CHLRE	Predicted protein (Fragment)	6e-62	tr|D8TPL9|D8TPL9_VOLCA	3e-65	scaffold30.g4451.t1	3e-74	scaffold30_size250005	2e-12
I0YLV2_9CHLO	Uncharacterized protein	lysine-specific demethylase JMJ25-like isoform X2			IPR014710 (G3DSA:2.60.120.GENE3D); IPR003347 (PFAM); PTHR12549:SF16 (PANTHER); PTHR12549 (PANTHER); IPR003347 (PROSITE_PROFILES); SSF51197 (SUPERFAMILY)	tr|A8HZA7|A8HZA7_CHLRE	Predicted protein	1e-22	tr|D8TZK3|D8TZK3_VOLCA	5e-26	scaffold30.g4446.t1	2e-21	scaffold30_size250005	8e-10
I0YLV3_9CHLO	Uncharacterized protein	lysine-specific demethylase JMJ25-like	F:zinc ion binding		IPR003347 (SMART); PTHR12549 (PANTHER); PTHR12549:SF15 (PANTHER); SSF51197 (SUPERFAMILY)	tr|A8HZA7|A8HZA7_CHLRE	Predicted protein	3e-15	tr|D8TZK3|D8TZK3_VOLCA	7e-30	scaffold30.g4446.t1	1e-32
I0YLV4_9CHLO	Uncharacterized protein	sentrin-specific protease 8	P:proteolysis; F:cysteine-type peptidase activity		SSF54001 (SUPERFAMILY)	tr|A8JCQ0|A8JCQ0_CHLRE	Predicted protein	3e-13	tr|D8TQ22|D8TQ22_VOLCA	4e-12
I0YLV5_9CHLO	P-loop containing nucleoside triphosphate hydrolase protein	pre-mRNA-splicing factor ATP-dependent RNA helicase DHX16 isoform X1	F:nucleic acid binding; F:nucleotide binding; F:hydrolase activity	EC:3.6.1; EC:3.6.1.3; EC:3.6.1.15	IPR014001 (SMART); IPR007502 (SMART); IPR001650 (SMART); IPR001650 (PFAM); IPR011709 (PFAM); IPR027417 (G3DSA:3.40.50.GENE3D); IPR007502 (PFAM); IPR027417 (G3DSA:3.40.50.GENE3D); PTHR18934 (PANTHER); PTHR18934:SF83 (PANTHER); IPR001650 (PROSITE_PROFILES); IPR014001 (PROSITE_PROFILES); IPR027417 (SUPERFAMILY)	tr|Q9FPR8|Q9FPR8_CHLRE	DEAH-box RNA helicase	0	tr|D8TRX0|D8TRX0_VOLCA	0	scaffold29.g5931.t1	0	scaffold29_size256459	1e-21
I0YLV7_9CHLO	Uncharacterized protein	zinc finger CCCH domain-containing 23-like	C:nucleus; F:DNA binding; F:transcription factor activity, sequence-specific DNA binding; F:RNA binding; C:cytoplasm; P:nucleobase-containing compound metabolic process; P:translation		IPR000571 (SMART); IPR000571 (G3DSA:4.10.1000.GENE3D); IPR000571 (PFAM); PTHR14493 (PANTHER); PTHR14493:SF41 (PANTHER); IPR000571 (PROSITE_PROFILES); IPR000571 (SUPERFAMILY)	tr|A8HRT5|A8HRT5_CHLRE	Predicted protein (Fragment)	7e-45	tr|D8UIN8|D8UIN8_VOLCA	4e-47	scaffold5.g611.t1	9e-43	scaffold2_size3998120	1e-32
I0YLV8_9CHLO	Myo-inositol-1-phosphate synthase (Fragment)	inositol-3-phosphate synthase	P:carbohydrate metabolic process; F:catalytic activity; P:lipid metabolic process; P:biosynthetic process; P:cellular process	EC:5.5.1.4	IPR002587 (PIRSF); IPR002587 (PFAM); IPR013021 (PFAM); G3DSA:3.30.360.10 (GENE3D); IPR016040 (G3DSA:3.40.50.GENE3D); PTHR11510:SF6 (PANTHER); IPR002587 (PANTHER); IPR016040 (SUPERFAMILY); SSF55347 (SUPERFAMILY)	tr|A8IDE6|A8IDE6_CHLRE	Myo-inositol-1-phosphate synthase	0	tr|D8TKS1|D8TKS1_VOLCA	0	scaffold1.g5487.t1	0	scaffold1_size3450625	6e-47
I0YLW4_9CHLO	Thioredoxin-like protein (Fragment)	thioredoxin-dependent peroxide	P:cellular homeostasis; F:catalytic activity; P:metabolic process	EC:1.11.1.15	IPR000866 (PFAM); IPR012336 (G3DSA:3.40.30.GENE3D); IPR019479 (PFAM); IPR012336 (G3DSA:3.40.30.GENE3D); PTHR10681:SF114 (PANTHER); PTHR10681 (PANTHER); IPR013766 (PROSITE_PROFILES); IPR012336 (SUPERFAMILY); IPR012336 (SUPERFAMILY)	tr|A8JIT5|A8JIT5_CHLRE	Peroxiredoxin (Fragment)	6e-89	tr|D8UGW8|D8UGW8_VOLCA	2e-85	scaffold30.g4448.t1	8e-60	scaffold30_size250005	5e-23
I0YLW6_9CHLO	P-loop containing nucleoside triphosphate hydrolase protein	ABC transporter C family member 13 isoform X3	F:nucleotide binding; C:membrane; F:transporter activity; F:hydrolase activity	EC:3.6.1; EC:3.6.1.3; EC:3.6.1.15	IPR003593 (SMART); IPR011527 (PFAM); IPR027417 (G3DSA:3.40.50.GENE3D); IPR003439 (PFAM); G3DSA:1.20.1560.10 (GENE3D); IPR027417 (G3DSA:3.40.50.GENE3D); PTHR24223:SF232 (PANTHER); PTHR24223 (PANTHER); IPR003439 (PROSITE_PROFILES); IPR011527 (PROSITE_PROFILES); IPR011527 (SUPERFAMILY); IPR027417 (SUPERFAMILY); IPR027417 (SUPERFAMILY); IPR011527 (SUPERFAMILY)	tr|A8I268|A8I268_CHLRE	ABC transporter	3e-104	tr|D8TK25|D8TK25_VOLCA	2e-90	scaffold30.g4434.t1	3e-83	scaffold30_size250005	6e-34
I0YLW7_9CHLO	Clavaminate synthase-like protein	2OG-Fe(II) oxygenase	F:catalytic activity; P:metabolic process; F:binding		IPR026992 (PFAM); IPR027443 (G3DSA:2.60.120.GENE3D); IPR005123 (PFAM); PTHR10209 (PANTHER); IPR005123 (PROSITE_PROFILES); SSF51197 (SUPERFAMILY)	tr|A8I1T0|A8I1T0_CHLRE	Oxygenase-like protein	1e-15	tr|D8TU52|D8TU52_VOLCA	4e-17	scaffold4.g4860.t1	3e-34
I0YLW8_9CHLO	Uncharacterized protein	camp-binding domain	F:transporter activity; P:cellular process; C:plasma membrane		IPR003938 (PRINTS); IPR000595 (SMART); G3DSA:1.10.287.630 (GENE3D); IPR013099 (PFAM); G3DSA:1.10.287.70 (GENE3D); IPR014710 (G3DSA:2.60.120.GENE3D); IPR000595 (PFAM); PTHR10217 (PANTHER); IPR000595 (PROSITE_PROFILES); SSF81324 (SUPERFAMILY); IPR018490 (SUPERFAMILY)	tr|A8J0U9|A8J0U9_CHLRE	Predicted protein	1e-59	tr|D8ULH4|D8ULH4_VOLCA	4e-68	scaffold1.g5526.t1	5e-49	scaffold1_size3450625	1e-08
I0YLW9_9CHLO	Uncharacterized protein	intraflagellar transport 172 homolog	C:cytoskeleton; F:protein binding		IPR001680 (SMART); IPR011990 (G3DSA:1.25.40.GENE3D); IPR015943 (G3DSA:2.130.10.GENE3D); PTHR15722 (PANTHER); PTHR15722:SF2 (PANTHER); IPR017986 (PROSITE_PROFILES); IPR017986 (SUPERFAMILY)	sp|Q5DM57|IF172_CHLRE	Intraflagellar transport protein 172	2e-93	tr|D8TTH3|D8TTH3_VOLCA	5e-90
I0YLX0_9CHLO	Succinyl-CoA ligase subunit beta	Succinyl- ligase [ADP-forming] subunit mitochondrial	F:nucleotide binding; F:catalytic activity; C:mitochondrion; P:metabolic process		IPR005809 (PIRSF); IPR005811 (PFAM); IPR005809 (TIGRFAM); IPR013650 (PFAM); IPR013816 (G3DSA:3.30.470.GENE3D); IPR016102 (G3DSA:3.40.50.GENE3D); IPR013815 (G3DSA:3.30.1490.GENE3D); IPR005809 (PANTHER); PTHR11815:SF1 (PANTHER); IPR011761 (PROSITE_PROFILES); IPR016102 (SUPERFAMILY); SSF56059 (SUPERFAMILY)	tr|A8IQ05|A8IQ05_CHLRE	Succinyl-CoA ligase subunit beta	0	tr|D8TTH7|D8TTH7_VOLCA	0	scaffold30.g4443.t1	0	scaffold30_size250005	6e-15
I0YLX3_9CHLO	Kinesin-like protein	kinesin motor domain	F:nucleotide binding; C:cytoskeleton; F:protein binding; P:cellular process; F:motor activity	EC:3.6.1; EC:3.6.1.15	IPR001752 (PRINTS); IPR001752 (SMART); IPR001752 (PFAM); IPR001752 (G3DSA:3.40.850.GENE3D); IPR027640 (PANTHER); IPR001752 (PROSITE_PROFILES); IPR027417 (SUPERFAMILY)	tr|A8IFN0|A8IFN0_CHLRE	Kinesin-like protein (Fragment)	2e-94	tr|D8UD54|D8UD54_VOLCA	1e-75	scaffold3.g6286.t1	9e-81	scaffold3_size2545224	2e-43
I0YLX4_9CHLO	Eukaryotic translation initiation factor 6	eukaryotic initiation factor	P:cellular component organization; C:cytosol; F:translation factor activity, RNA binding; C:nucleolus; C:ribosome; P:transport; P:nucleobase-containing compound metabolic process		IPR002769 (SMART); IPR002769 (PIRSF); IPR002769 (PFAM); IPR002769 (TIGRFAM); G3DSA:3.75.10.10 (GENE3D); IPR002769 (PANTHER); IPR002769 (HAMAP); SSF55909 (SUPERFAMILY)	tr|A8HUE0|A8HUE0_CHLRE	Eukaryotic translation initiation factor 6	3e-153	tr|D8TQW4|D8TQW4_VOLCA	2e-155	scaffold8.g1457.t1	2e-138	scaffold8_size1730130	4e-54
I0YLX7_9CHLO	Uncharacterized protein	Oocyte-specific histone RNA stem-loop-binding 2	F:RNA binding		IPR029344 (PFAM); IPR026502 (PANTHER)	tr|A8J2B6|A8J2B6_CHLRE	Histone gene transcript 5' hairpin-binding protein (Fragment)	3e-21	tr|D8U5D6|D8U5D6_VOLCA	5e-18	scaffold1.g5719.t1	4e-30	scaffold1_size3450625	5e-09
I0YLY0_9CHLO	Lipoxygenase (Fragment)	linoleate 13S-lipoxygenase 2- chloroplastic-like	F:nucleotide binding; F:DNA binding; F:protein binding; P:DNA metabolic process; P:response to stress; F:hydrolase activity	EC:1.13.11; EC:3.6.1; EC:3.6.1.3; EC:3.6.1.15	IPR001246 (PRINTS); IPR013819 (PRINTS); IPR013819 (PFAM); G3DSA:1.20.245.10 (GENE3D); G3DSA:4.10.375.10 (GENE3D); IPR027433 (G3DSA:4.10.372.GENE3D); IPR027417 (G3DSA:3.40.50.GENE3D); IPR001024 (G3DSA:2.60.60.GENE3D); IPR013632 (PFAM); G3DSA:3.10.450.60 (GENE3D); IPR000907 (PANTHER); IPR020588 (PROSITE_PROFILES); IPR013819 (PROSITE_PROFILES); IPR001024 (SUPERFAMILY); IPR027417 (SUPERFAMILY); IPR01…	tr|A8IKX4|A8IKX4_CHLRE	Lipoxygenase	6e-89	tr|D8U0N7|D8U0N7_VOLCA	3e-118	scaffold5.g609.t1	6e-32	scaffold5_size2028652	3e-14
I0YLY1_9CHLO	Camp-binding domain-like protein	cyclic nucleotide-binding	F:transporter activity; P:cellular process; C:plasma membrane		IPR003938 (PRINTS); IPR000595 (SMART); IPR000595 (PFAM); G3DSA:1.10.287.70 (GENE3D); IPR014710 (G3DSA:2.60.120.GENE3D); G3DSA:1.10.287.630 (GENE3D); IPR013099 (PFAM); PTHR10217 (PANTHER); IPR000595 (PROSITE_PROFILES); SSF81324 (SUPERFAMILY); IPR018490 (SUPERFAMILY)	tr|A8J0U9|A8J0U9_CHLRE	Predicted protein	1e-47	tr|D8ULH4|D8ULH4_VOLCA	7e-45	scaffold13.g211.t1	5e-44
I0YLY4_9CHLO	HECT-domain-containing protein	HECT E3 ubiquitin	P:cellular protein modification process; F:transferase activity		IPR000569 (SMART); G3DSA:3.30.2160.10 (GENE3D); IPR000569 (PFAM); PTHR11254 (PANTHER); IPR000569 (PROSITE_PROFILES); IPR000569 (SUPERFAMILY)	tr|A8J3Y0|A8J3Y0_CHLRE	Predicted protein	5e-127	tr|D8TQQ4|D8TQQ4_VOLCA	8e-144	scaffold6.g2588.t1	3e-103	scaffold6_size1922994	3e-37
I0YLY5_9CHLO	RCC1/BLIP-II	RCC1 BLIP-II	F:ubiquitin-protein transferase activity; F:protein homodimerization activity; P:signal transduction; F:photoreceptor activity; F:ligase activity; P:response to UV-B; P:protein ubiquitination		IPR000408 (PRINTS); IPR009091 (G3DSA:2.130.10.GENE3D); IPR000408 (PFAM); PTHR22870 (PANTHER); IPR000408 (PROSITE_PROFILES); IPR009091 (SUPERFAMILY); IPR009091 (SUPERFAMILY)	tr|A8JGB3|A8JGB3_CHLRE	Predicted protein	5e-45	tr|D8UKL7|D8UKL7_VOLCA	1e-45	scaffold5.g742.t1	5e-55	scaffold3_size2545224	5e-30
I0YLY6_9CHLO	DUF393-domain-containing protein	DCC family chloroplastic	C:plastoglobule		IPR007263 (PFAM); PTHR33639:SF2 (PANTHER); PTHR33639 (PANTHER)	tr|A8IUJ8|A8IUJ8_CHLRE	Predicted protein (Fragment)	6e-53	tr|D8TTD4|D8TTD4_VOLCA	3e-50	scaffold5.g739.t1	1e-27	scaffold5_size2028652	2e-25
I0YLY7_9CHLO	Uncharacterized protein	hypothetical protein COCSUDRAFT_48936			PTHR21228 (PANTHER)	tr|A8JA15|A8JA15_CHLRE	Predicted protein of CLR family	3e-12	tr|D8TMF6|D8TMF6_VOLCA	1e-21	scaffold3.g6564.t1	2e-11
I0YLY8_9CHLO	RCC1/BLIP-II	Regulator of chromosome condensation (RCC1) family	C:membrane		IPR000408 (PRINTS); IPR009091 (G3DSA:2.130.10.GENE3D); IPR000408 (PFAM); PTHR22870 (PANTHER); IPR000408 (PROSITE_PROFILES); IPR009091 (SUPERFAMILY); IPR009091 (SUPERFAMILY)	tr|A8JGB3|A8JGB3_CHLRE	Predicted protein	2e-20	tr|D8UKL7|D8UKL7_VOLCA	7e-17	scaffold2.g6967.t1	6e-40	scaffold3_size2545224	9e-12
I0YLZ1_9CHLO	ATP-dependent Clp protease proteolytic subunit	ATP-dependent Clp protease proteolytic subunit	P:protein metabolic process; F:hydrolase activity	EC:3.4.21	IPR001907 (PRINTS); IPR023562 (PFAM); IPR029045 (G3DSA:3.90.226.GENE3D); IPR023562 (PANTHER); PTHR10381:SF24 (PANTHER); IPR029045 (SUPERFAMILY)	tr|A8INX1|A8INX1_CHLRE	ATP-dependent Clp protease proteolytic subunit	2e-63	tr|D8TS53|D8TS53_VOLCA	3e-65	scaffold30.g4428.t1	5e-51	scaffold41_size205970	4e-33
I0YLZ4_9CHLO	Uncharacterized protein	50S ribosomal L22	F:RNA binding; F:structural molecule activity; C:ribosome; C:plastid; P:translation		IPR001063 (G3DSA:3.90.470.GENE3D); IPR005727 (TIGRFAM); IPR001063 (PFAM); IPR005727 (PANTHER); IPR005727 (HAMAP); IPR001063 (SUPERFAMILY)	sp|Q84U21|RK22_CHLRE	50S ribosomal protein L22, chloroplastic	2e-38	tr|D8THR4|D8THR4_VOLCA	2e-39	scaffold30.g4427.t1	2e-31	scaffold30_size250005	5e-11
I0YLZ5_9CHLO	Uncharacterized protein	SR factor	F:nucleotide binding; F:nucleic acid binding; F:protein binding; C:cytosol; C:nucleolus; P:nucleobase-containing compound metabolic process; C:nucleoplasm		IPR000504 (SMART); IPR012677 (G3DSA:3.30.70.GENE3D); IPR000504 (PFAM); PTHR23147 (PANTHER); PTHR23147:SF1 (PANTHER); IPR000504 (PROSITE_PROFILES); IPR012677 (SUPERFAMILY)	tr|A8J4I2|A8J4I2_CHLRE	SR protein factor	8e-31	tr|D8U6V5|D8U6V5_VOLCA	2e-31	scaffold3.g6175.t1	1e-23	scaffold3_size2545224	8e-09
I0YLZ6_9CHLO	Protein serine/threonine phosphatase 2C (Fragment)	serine threonine phosphatase partial	C:cell; P:cellular protein modification process; F:hydrolase activity	EC:3.1.3.16; EC:3.1; EC:3.1.3.41	IPR001932 (SMART); IPR001932 (PFAM); IPR001932 (G3DSA:3.60.40.GENE3D); IPR015655 (PANTHER); IPR001932 (PROSITE_PROFILES); IPR001932 (SUPERFAMILY)	tr|A8JBW4|A8JBW4_CHLRE	Protein phosphatase 2C catalytic subunit (Fragment)	1e-28	tr|D8TZV0|D8TZV0_VOLCA	2e-32	scaffold30.g4438.t1	9e-80	scaffold30_size250005	2e-11
I0YLZ7_9CHLO	Uncharacterized protein	signal recognition particle 19 kDa -like isoform X1	F:RNA binding; C:cytoplasm; P:cellular component organization; P:transport		IPR002778 (PFAM); IPR002778 (G3DSA:3.30.56.GENE3D); IPR002778 (PANTHER); IPR002778 (SUPERFAMILY)	tr|A8JG36|A8JG36_CHLRE	Subunit of the signal recognition particle (Fragment)	3e-11	tr|D8UKG5|D8UKG5_VOLCA	7e-18	scaffold21.g2125.t1	1e-18	scaffold21_size696144	6e-07
I0YM00_9CHLO	Uncharacterized protein	26S proteasome non-ATPase regulatory subunit 9	F:protein binding		IPR001478 (PFAM); IPR001478 (G3DSA:2.30.42.GENE3D); PTHR12651:SF1 (PANTHER); PTHR12651 (PANTHER); IPR001478 (SUPERFAMILY)	tr|A8IT97|A8IT97_CHLRE	Predicted protein (Fragment)	5e-41	tr|D8TZV7|D8TZV7_VOLCA	4e-43	scaffold30.g4437.t1	4e-50	scaffold30_size250005	1e-18
I0YM01_9CHLO	Raffinose synthase	raffinose synthase	F:catalytic activity		IPR008811 (PFAM); IPR013785 (G3DSA:3.20.20.GENE3D); PTHR31268 (PANTHER); IPR017853 (SUPERFAMILY)	tr|A8JF65|A8JF65_CHLRE	Raffinose synthase	4e-144	tr|D8UKY4|D8UKY4_VOLCA	1e-143	scaffold1.g5608.t1	3e-117	scaffold8_size1730130	7e-16
I0YM03_9CHLO	Uncharacterized protein	ATP-binding cassette sub-family B member 9-like isoform X1	F:nucleotide binding; C:membrane; F:transporter activity; F:hydrolase activity	EC:3.6.1; EC:3.6.1.3; EC:3.6.1.15	IPR003593 (SMART); PIRSF002773 (PIRSF); IPR027417 (G3DSA:3.40.50.GENE3D); IPR011527 (PFAM); G3DSA:1.20.1560.10 (GENE3D); IPR003439 (PFAM); PTHR24221 (PANTHER); IPR011527 (PROSITE_PROFILES); IPR003439 (PROSITE_PROFILES); IPR027417 (SUPERFAMILY); IPR011527 (SUPERFAMILY)	tr|A8I872|A8I872_CHLRE	Predicted protein	7e-172	tr|D8U0X3|D8U0X3_VOLCA	1e-108	scaffold3.g6350.t1	0	scaffold3_size2545224	6e-26
I0YM04_9CHLO	DEAD-domain-containing protein	DEAD-box ATP-dependent RNA helicase 38	F:nucleic acid binding; F:nucleotide binding; P:response to abiotic stimulus; P:nucleobase-containing compound metabolic process; C:intracellular; P:response to stress; F:hydrolase activity; P:translation	EC:3.6.1; EC:3.6.1.3; EC:2.7.7; EC:3.6.1.15	IPR001650 (SMART); IPR014001 (SMART); IPR027417 (G3DSA:3.40.50.GENE3D); IPR011545 (PFAM); IPR027417 (G3DSA:3.40.50.GENE3D); IPR001650 (PFAM); PTHR24031:SF318 (PANTHER); PTHR24031 (PANTHER); IPR014014 (PROSITE_PROFILES); IPR014001 (PROSITE_PROFILES); IPR001650 (PROSITE_PROFILES); IPR027417 (SUPERFAMILY)	tr|A8IMW9|A8IMW9_CHLRE	Predicted protein (Fragment)	0	tr|D8TKE7|D8TKE7_VOLCA	0	scaffold6.g2507.t1	3e-60	scaffold37_size123908	1e-31
I0YM06_9CHLO	DUF1751-domain-containing protein	rhomboid 19	C:membrane; P:transport; C:intracellular		SM01160 (SMART); IPR013861 (PFAM); PTHR13377 (PANTHER); SSF144091 (SUPERFAMILY)	tr|A8IRB6|A8IRB6_CHLRE	Predicted protein	5e-63	tr|D8TYD4|D8TYD4_VOLCA	3e-72	scaffold5.g679.t1	5e-46
I0YM07_9CHLO	Uncharacterized protein	RNA-binding 5-like isoform X1	F:nucleic acid binding; C:nucleus; P:nucleobase-containing compound metabolic process		IPR003604 (SMART); IPR013085 (PFAM); PTHR13173 (PANTHER); IPR000690 (PROSITE_PROFILES); SSF57667 (SUPERFAMILY)	tr|A8IMJ7|A8IMJ7_CHLRE	Predicted protein (Fragment)	1e-18	tr|D8TKE1|D8TKE1_VOLCA	1e-50	scaffold5.g816.t1	6e-53	scaffold5_size2028652	1e-07
I0YM08_9CHLO	Ribosomal protein L13a component of cytosolic 80S ribosome and 60S large subunit	60S ribosomal L13a-2-like	F:RNA binding; F:structural molecule activity; C:cytosol; C:ribosome; P:translation		IPR005822 (G3DSA:3.90.1180.GENE3D); IPR005822 (PFAM); IPR005755 (TIGRFAM); IPR005755 (PTHR11545:PANTHER); IPR005822 (PANTHER); IPR005822 (HAMAP); IPR005822 (SUPERFAMILY)	tr|A8IVU0|A8IVU0_CHLRE	Ribosomal protein L13a	4e-108	tr|D8U3Z9|D8U3Z9_VOLCA	7e-108	scaffold5.g804.t1	5e-85	scaffold5_size2028652	1e-40
I0YM09_9CHLO	Uncharacterized protein	thylakoid lumenal kDa chloroplastic	C:plastid; C:thylakoid		PTHR35514 (PANTHER)	tr|A8JDW2|A8JDW2_CHLRE	Predicted protein	4e-77	tr|D8U3S7|D8U3S7_VOLCA	3e-78	scaffold20.g7811.t1	3e-60	scaffold20_size1437327	1e-14
I0YM11_9CHLO	Uncharacterized protein	light-mediated development DET1-like isoform X1	F:protein binding		IPR019138 (PFAM); G3DSA:1.20.1280.50 (GENE3D); IPR001810 (PFAM); PTHR13374 (PANTHER); IPR001810 (PROSITE_PROFILES); IPR001810 (SUPERFAMILY)	tr|A8HSI4|A8HSI4_CHLRE	Predicted protein (Fragment)	6e-18	tr|D8TRZ9|D8TRZ9_VOLCA	2e-23	scaffold5.g716.t1	1e-17
I0YM12_9CHLO	Uncharacterized protein	probable RNA polymerase II transcription factor B subunit 1-1 isoform X1	C:nucleus; P:biosynthetic process; P:DNA metabolic process; P:response to stress		IPR005607 (SMART); IPR005607 (PFAM); IPR027079 (PANTHER); IPR005607 (PROSITE_PROFILES); SSF140383 (SUPERFAMILY); SSF140383 (SUPERFAMILY)	tr|A8I1S1|A8I1S1_CHLRE	Predicted protein	8e-11	tr|D8TU17|D8TU17_VOLCA	2e-18	scaffold5.g684.t1	2e-21
I0YM14_9CHLO	Ribosomal protein L25-like protein	50S ribosomal L25	F:RNA binding; F:structural molecule activity; C:ribosome; P:translation		IPR001021 (TIGRFAM); IPR020056 (G3DSA:2.40.240.GENE3D); IPR029751 (PFAM); IPR020057 (PFAM); IPR020057 (G3DSA:2.170.120.GENE3D); PTHR33284:SF1 (PANTHER); PTHR33284 (PANTHER); IPR029751 (PRODOM); IPR011035 (SUPERFAMILY)	tr|A8I7Y1|A8I7Y1_CHLRE	Predicted protein	4e-24	tr|D8U4P4|D8U4P4_VOLCA	2e-17	scaffold5.g673.t1	1e-17	scaffold53_size51945	1e-06
I0YM15_9CHLO	P-loop containing nucleoside triphosphate hydrolase protein	Eukaryotic translation initiation factor 5B	F:nucleotide binding; F:translation factor activity, RNA binding; C:ribosome; F:hydrolase activity	EC:3.6.1; EC:3.6.1.15	IPR000795 (PRINTS); IPR005225 (TIGRFAM); IPR004161 (PFAM); IPR023115 (G3DSA:3.40.50.GENE3D); PF00009 (PFAM); G3DSA:2.40.30.10 (GENE3D); IPR027417 (G3DSA:3.40.50.GENE3D); IPR023115 (PFAM); G3DSA:2.40.30.10 (GENE3D); PTHR23115:SF186 (PANTHER); PTHR23115 (PANTHER); IPR000795 (PROSITE_PROFILES); IPR027417 (SUPERFAMILY); IPR009000 (SUPERFAMILY); IPR023115 (SUPERFAMILY)	tr|A8IAC7|A8IAC7_CHLRE	Eukaryotic initiation factor (Fragment)	0	tr|D8U864|D8U864_VOLCA	0	scaffold5.g812.t1	1e-92	scaffold5_size2028652	9e-29
I0YM17_9CHLO	Aquaporin-like protein	glycerol transport activity	C:membrane; F:transporter activity		IPR000425 (PRINTS); IPR000425 (PFAM); IPR023271 (G3DSA:1.20.1080.GENE3D); PTHR19139:SF180 (PANTHER); IPR000425 (PANTHER); IPR023271 (SUPERFAMILY)	tr|Q5VLJ9|Q5VLJ9_CHLRE	Aquaporin, glycerol transport activity	1e-51	tr|D8UCI9|D8UCI9_VOLCA	2e-50	scaffold1.g5504.t1	1e-43	scaffold1_size3450625	2e-09
I0YM18_9CHLO	Dynamin-related protein 5A	dynamin-related 1E-like	F:nucleotide binding; P:catabolic process; P:biosynthetic process; F:transferase activity; P:cellular process; F:hydrolase activity	EC:3.6.1; EC:2.6.1.42; EC:3.6.1.15	IPR022812 (PRINTS); IPR003130 (SMART); IPR001401 (SMART); IPR003130 (PFAM); IPR000375 (PFAM); IPR027417 (G3DSA:3.40.50.GENE3D); IPR022812 (PFAM); IPR022812 (PANTHER); IPR030381 (PROSITE_PROFILES); IPR020850 (PROSITE_PROFILES); IPR027417 (SUPERFAMILY)	tr|A8I5K1|A8I5K1_CHLRE	Dynamin-related GTPase	0	tr|D8U219|D8U219_VOLCA	0	scaffold5.g725.t1	0	scaffold5_size2028652	3e-20
I0YM19_9CHLO	MFS general substrate transporter	sodium-dependent phosphate transport chloroplastic-like isoform X1	C:membrane; C:plastid; F:transporter activity		G3DSA:1.20.1250.20 (GENE3D); G3DSA:1.20.1250.20 (GENE3D); IPR011701 (PFAM); PTHR11662 (PANTHER); PTHR11662:SF226 (PANTHER); IPR020846 (PROSITE_PROFILES); IPR020846 (SUPERFAMILY)	tr|A8IRP0|A8IRP0_CHLRE	Predicted protein	3e-167	tr|D8TV41|D8TV41_VOLCA	5e-151	scaffold5.g660.t1	4e-142	scaffold5_size2028652	2e-15
I0YM20_9CHLO	Ribosomal protein L21	ribosomal L21	F:RNA binding; F:structural molecule activity; C:ribosome; P:translation		IPR028909 (PFAM); IPR001787 (TIGRFAM); PTHR21349 (PANTHER); PTHR21349:SF3 (PANTHER); IPR001787 (HAMAP); IPR028909 (SUPERFAMILY)	tr|A8IP00|A8IP00_CHLRE	Plastid ribosomal protein L21	9e-43	tr|D8TS73|D8TS73_VOLCA	8e-44	scaffold2.g7006.t1	2e-26	scaffold2_size3998120	1e-24
I0YM23_9CHLO	Delta-aminolevulinic acid dehydratase	delta-aminolevulinic acid dehydratase	F:nucleotide binding; F:protein binding; C:membrane; C:cytosol; P:biosynthetic process; P:nucleobase-containing compound metabolic process; F:transporter activity; F:hydrolase activity	EC:3.6.1; EC:3.6.1.3; EC:4.2.1.24; EC:3.6.1.15	IPR001731 (PRINTS); IPR001731 (SMART); IPR033391 (PFAM); IPR013785 (G3DSA:3.20.20.GENE3D); IPR005024 (PFAM); G3DSA:3.40.190.80 (GENE3D); G3DSA:3.30.540.10 (GENE3D); IPR001731 (PFAM); IPR001731 (PANTHER); SSF56655 (SUPERFAMILY); SSF51569 (SUPERFAMILY)	tr|A8I980|A8I980_CHLRE	Delta-aminolevulinic acid dehydratase	0	tr|D8TJ31|D8TJ31_VOLCA	0	scaffold3.g6504.t1	5e-67	scaffold3_size2545224	6e-23
I0YM24_9CHLO	RFC1-domain-containing protein (Fragment)	Replication factor C subunit 1	F:nucleotide binding; C:nucleus; F:DNA binding; P:biosynthetic process; P:DNA metabolic process; P:reproduction; P:response to stress; F:hydrolase activity	EC:3.6.1; EC:3.6.1.3; EC:3.6.1.15	IPR012178 (PIRSF); IPR003593 (SMART); G3DSA:1.10.8.60 (GENE3D); IPR027417 (G3DSA:3.40.50.GENE3D); IPR003959 (PFAM); G3DSA:1.20.272.10 (GENE3D); IPR013725 (PFAM); PTHR23389:SF10 (PANTHER); PTHR23389 (PANTHER); IPR027417 (SUPERFAMILY); IPR008921 (SUPERFAMILY)	tr|A8J5W8|A8J5W8_CHLRE	DNA replication factor C complex subunit 1 (Fragment)	4e-171	tr|D8UHI8|D8UHI8_VOLCA	7e-154	scaffold1.g5516.t1	1e-154	scaffold1_size3450625	2e-19
I0YM25_9CHLO	Uncharacterized protein	Glucose-6-phosphate phosphate and phosphoenolpyruvate phosphate antiporter (ISS)	C:membrane		IPR004853 (PFAM); PTHR11132 (PANTHER)	tr|A8J3W2|A8J3W2_CHLRE	Predicted protein (Fragment)	2e-35	tr|D8TYW7|D8TYW7_VOLCA	4e-40	scaffold5.g728.t1	8e-50
I0YM26_9CHLO	Nop53-domain-containing protein	Nop53-domain-containing protein			IPR011687 (PIRSF); IPR011687 (PFAM); IPR011687 (PANTHER)	tr|A8IU13|A8IU13_CHLRE	Predicted protein	2e-24	tr|D8TZA8|D8TZA8_VOLCA	2e-25	scaffold5.g644.t1	1e-34
I0YM27_9CHLO	Sarcosine oxidase (Fragment)	N-methyltryptophan oxidase	F:catalytic activity; P:metabolic process		IPR006076 (PFAM); G3DSA:3.30.9.10 (GENE3D); IPR023753 (G3DSA:3.50.50.GENE3D); PTHR10961 (PANTHER); PTHR10961:SF7 (PANTHER); IPR023753 (SUPERFAMILY); SSF54373 (SUPERFAMILY)	tr|A8JDQ2|A8JDQ2_CHLRE	Predicted protein	9e-97	tr|D8TXV0|D8TXV0_VOLCA	1e-72	scaffold30.g4458.t1	4e-80	scaffold30_size250005	4e-43
I0YM35_9CHLO	Uncharacterized protein	peroxisome biogenesis 2	F:protein binding; P:cellular process		IPR001841 (SMART); IPR018957 (PFAM); IPR013083 (G3DSA:3.30.40.GENE3D); IPR006845 (PFAM); IPR001841 (PROSITE_PROFILES); SSF57850 (SUPERFAMILY)	tr|A8IQR6|A8IQR6_CHLRE	Predicted protein	4e-19	tr|D8TT78|D8TT78_VOLCA	7e-57	scaffold5.g872.t1	5e-92	scaffold5_size2028652	1e-32
I0YM36_9CHLO	DEAD-domain-containing protein (Fragment)	DEAD-box ATP-dependent RNA helicase 24	F:nucleic acid binding; F:nucleotide binding; P:nucleobase-containing compound metabolic process; F:hydrolase activity	EC:3.6.1; EC:3.6.1.3; EC:2.7.7; EC:3.6.1.15	IPR014001 (SMART); IPR001650 (SMART); IPR011545 (PFAM); IPR027417 (G3DSA:3.40.50.GENE3D); IPR027417 (G3DSA:3.40.50.GENE3D); IPR001650 (PFAM); PTHR24031:SF125 (PANTHER); PTHR24031 (PANTHER); IPR001650 (PROSITE_PROFILES); IPR014001 (PROSITE_PROFILES); IPR014014 (PROSITE_PROFILES); IPR027417 (SUPERFAMILY); IPR027417 (SUPERFAMILY)	tr|A8HQA8|A8HQA8_CHLRE	DEAD-box RNA helicase	1e-126	tr|D8TSV0|D8TSV0_VOLCA	8e-126	scaffold5.g706.t1	8e-146	scaffold37_size123908	5e-56
I0YM37_9CHLO	Cytidine deaminase-like protein	tRNA-specific adenosine deaminase	F:binding; P:nucleobase-containing compound metabolic process; F:hydrolase activity	EC:3.5.4; EC:3.5.4.4	G3DSA:3.40.140.10 (GENE3D); IPR028883 (PFAM); PTHR11079:SF72 (PANTHER); PTHR11079 (PANTHER); IPR002125 (PROSITE_PROFILES); IPR028883 (HAMAP); IPR016193 (SUPERFAMILY)	tr|A8HSU4|A8HSU4_CHLRE	Predicted protein (Fragment)	8e-33	tr|D8TSB3|D8TSB3_VOLCA	5e-23	scaffold5.g738.t1	3e-37	scaffold5_size2028652	3e-31
I0YM38_9CHLO	Uncharacterized protein	SOUL heme-binding	C:membrane; C:integral component of membrane		IPR018790 (PFAM); PTHR34123:SF1 (PANTHER); PTHR34123 (PANTHER); IPR032710 (SUPERFAMILY)	tr|A8JFN5|A8JFN5_CHLRE	SOUL heme-binding protein	1e-72	tr|D8U5C7|D8U5C7_VOLCA	2e-73	scaffold12.g8266.t1	2e-67	scaffold12_size2011427	2e-08
I0YM39_9CHLO	T-complex protein 1 subunit gamma	T-complex 1 gamma subunit	F:nucleotide binding; F:protein binding; C:cytosol; P:cellular process		IPR017998 (PRINTS); IPR002423 (PFAM); IPR012719 (TIGRFAM); IPR027410 (G3DSA:3.30.260.GENE3D); IPR027409 (G3DSA:3.50.7.GENE3D); IPR027413 (G3DSA:1.10.560.GENE3D); IPR012719 (PTHR11353:PANTHER); PTHR11353 (PANTHER); SSF48592 (SUPERFAMILY); SSF54849 (SUPERFAMILY); IPR027409 (SUPERFAMILY)	tr|A8II42|A8II42_CHLRE	T-complex protein 1 subunit gamma	0	tr|D8U243|D8U243_VOLCA	0	scaffold5.g807.t1	0	scaffold5_size2028652	1e-31
I0YM40_9CHLO	Uncharacterized protein	prohibitin- mitochondrial-like isoform X1	C:membrane; C:plastid; F:transporter activity		IPR000163 (PRINTS); IPR001107 (SMART); IPR001107 (PFAM); PTHR23222:SF1 (PANTHER); IPR000163 (PANTHER); IPR001107 (SUPERFAMILY)	tr|A8I8V6|A8I8V6_CHLRE	Prohibitin	5e-153	tr|D8U4Q8|D8U4Q8_VOLCA	1e-155	scaffold5.g806.t1	2e-171	scaffold5_size2028652	8e-38
I0YM41_9CHLO	C-terminal autoproteolytic domain of nucleoporin nup98 (Fragment)	nuclear pore complex Nup96 homolog	C:nuclear envelope; P:transport		IPR007230 (PFAM); IPR007230 (G3DSA:3.30.1610.GENE3D); PTHR23198 (PANTHER); IPR007230 (PROSITE_PROFILES); IPR007230 (SUPERFAMILY)	tr|A8I8Q0|A8I8Q0_CHLRE	Predicted protein (Fragment)	7e-40	tr|D8U4R9|D8U4R9_VOLCA	1e-40	scaffold5.g748.t1	3e-48	scaffold5_size2028652	2e-10
I0YM43_9CHLO	Putative isoamylase-type starch debranching enzyme	Isoamylase chloroplastic	P:carbohydrate metabolic process; C:plastid; P:cellular process; F:hydrolase activity		IPR006047 (SMART); IPR004193 (PFAM); IPR013783 (G3DSA:2.60.40.GENE3D); IPR013780 (G3DSA:2.60.40.GENE3D); IPR006047 (PFAM); IPR013781 (G3DSA:3.20.20.GENE3D); IPR015902 (PANTHER); PTHR10357:SF74 (PANTHER); SSF51011 (SUPERFAMILY); IPR017853 (SUPERFAMILY); IPR014756 (SUPERFAMILY)	tr|A8JBU2|A8JBU2_CHLRE	Isoamylase, starch debranching enzyme	0	tr|D8TX01|D8TX01_VOLCA	0	scaffold5.g861.t1	0	scaffold5_size2028652	2e-16
I0YM44_9CHLO	Phosphoserine phosphatase (Fragment)	phosphoserine chloroplastic	P:biosynthetic process; F:binding; C:plastid; P:cellular process; F:hydrolase activity	EC:3.1; EC:3.1.3.3; EC:3.1.3.41	IPR006383 (TIGRFAM); IPR023190 (G3DSA:1.10.150.GENE3D); PF12710 (PFAM); IPR023214 (G3DSA:3.40.50.GENE3D); PTHR10000:SF7 (PANTHER); PTHR10000 (PANTHER); IPR023214 (SUPERFAMILY)	tr|A8JEM3|A8JEM3_CHLRE	Phosphoserine phosphatase	4e-100	tr|D8TXA4|D8TXA4_VOLCA	6e-85	scaffold5.g707.t1	3e-50	scaffold5_size2028652	2e-14
I0YM45_9CHLO	Ribosome biogenesis protein BOP1 homolog	ribosome biogenesis BOP1 homolog isoform X1	F:protein binding; C:nucleolus; P:nucleobase-containing compound metabolic process; C:nucleoplasm		IPR012953 (SMART); IPR001680 (SMART); IPR001680 (PFAM); IPR012953 (PFAM); IPR015943 (G3DSA:2.130.10.GENE3D); PTHR17605 (PANTHER); IPR001680 (PROSITE_PROFILES); IPR028598 (HAMAP); IPR017986 (PROSITE_PROFILES); IPR017986 (SUPERFAMILY)	sp|A8ID74|BOP1_CHLRE	Ribosome biogenesis protein BOP1 homolog OS=Chlamydomonas reinhardtii GN=CHLREDRAFT_111274 PE=3 SV=2	0	tr|D8UG18|D8UG18_VOLCA	6e-158	scaffold5.g863.t1	7e-145	scaffold5_size2028652	2e-12
I0YM46_9CHLO	Frataxin	frataxin mitochondrial	F:catalytic activity; C:mitochondrion; P:cellular component organization; P:biosynthetic process; F:binding	EC:1.16.3.1; EC:1.16.3	IPR002908 (SMART); IPR002908 (TIGRFAM); IPR002908 (G3DSA:3.30.920.GENE3D); IPR002908 (PFAM); IPR017789 (TIGRFAM); IPR002908 (PANTHER); IPR002908 (PROSITE_PROFILES); IPR002908 (SUPERFAMILY)	tr|A8IVC5|A8IVC5_CHLRE	Frataxin	8e-33	tr|D8TWP9|D8TWP9_VOLCA	3e-37			scaffold26_size333660	5e-12
I0YM47_9CHLO	Uncharacterized protein	hypothetical protein COCSUDRAFT_54701	C:membrane		PTHR37735 (PANTHER)	tr|A8IR86|A8IR86_CHLRE	Predicted protein	4e-12	tr|D8UB47|D8UB47_VOLCA	7e-14
I0YM48_9CHLO	Ribosomal protein S19	40S ribosomal S15	F:RNA binding; F:structural molecule activity; P:cellular component organization; C:cytosol; C:ribosome; P:translation		IPR002222 (PRINTS); IPR005713 (TIGRFAM); IPR023575 (G3DSA:3.30.860.GENE3D); IPR002222 (PFAM); IPR002222 (PANTHER); PTHR11880:SF10 (PANTHER); IPR002222 (HAMAP); IPR023575 (SUPERFAMILY)	tr|A8J493|A8J493_CHLRE	Ribosomal protein S15	2e-75	tr|D8TY14|D8TY14_VOLCA	1e-84	scaffold7.g3693.t1	2e-80	scaffold7_size1837125	1e-19
I0YM50_9CHLO	Uncharacterized protein	dynamin family	F:DNA binding; P:DNA metabolic process; P:response to stress		IPR022812 (PFAM); IPR027417 (G3DSA:3.40.50.GENE3D); IPR014751 (G3DSA:1.20.5.GENE3D); IPR027417 (SUPERFAMILY)	tr|A8HS69|A8HS69_CHLRE	Predicted protein (Fragment)	2e-62	tr|D8TN86|D8TN86_VOLCA	6e-80	scaffold5.g864.t1	8e-104	scaffold5_size2028652	5e-08
I0YM53_9CHLO	Phospholipid-transporting ATPase	phospholipid-transporting ATPase 3-like isoform X1	F:nucleotide binding; C:cytoplasm; P:cellular component organization; C:Golgi apparatus; C:plasma membrane; F:transporter activity; F:hydrolase activity	EC:3.6.1; EC:3.6.1.3; EC:3.6.3.1; EC:3.6.1.15	PR00119 (PRINTS); PF13246 (PFAM); IPR023214 (G3DSA:3.40.50.GENE3D); IPR006539 (TIGRFAM); IPR008250 (PFAM); IPR008250 (G3DSA:2.70.150.GENE3D); IPR032631 (PFAM); IPR032630 (PFAM); IPR001757 (TIGRFAM); IPR023299 (G3DSA:3.40.1110.GENE3D); IPR006539 (PANTHER); PTHR24092:SF55 (PANTHER); SSF81653 (SUPERFAMILY); IPR023299 (SUPERFAMILY); SSF81665 (SUPERFAMILY); IPR023214 (SUPERFAMILY)	tr|A8IVJ6|A8IVJ6_CHLRE	Phospholipid-transporting ATPase	0	tr|D8TWU4|D8TWU4_VOLCA	0	scaffold18.g1919.t1	8e-93	scaffold18_size793176	2e-13
I0YM54_9CHLO	Uncharacterized protein	flagellar basal body	C:motile cilium; C:ciliary basal body		PTHR14845 (PANTHER); PTHR14845:SF0 (PANTHER)	tr|A8I6L8|A8I6L8_CHLRE	Flagellar/basal body protein	3e-53	tr|D8UL33|D8UL33_VOLCA	4e-26	scaffold5.g647.t1	3e-16	scaffold5_size2028652	1e-07
I0YM55_9CHLO	Uncharacterized protein	hypothetical protein COCSUDRAFT_48957			IPR007138 (PFAM); G3DSA:3.30.70.900 (GENE3D); IPR011008 (SUPERFAMILY)	tr|A8J648|A8J648_CHLRE	Putative uncharacterized protein	4e-33	tr|D8TNX9|D8TNX9_VOLCA	3e-37	scaffold5.g712.t1	1e-48
I0YM56_9CHLO	ParB domain protein nuclease (Fragment)	chloroplastic mitochondrial	F:nucleotide binding; F:catalytic activity; P:metabolic process; P:cellular process	EC:1.8.98.2	IPR016692 (PIRSF); IPR003115 (SMART); IPR003115 (PFAM); G3DSA:3.90.1530.10 (GENE3D); IPR016692 (PANTHER); IPR003115 (SUPERFAMILY)	tr|A8JG77|A8JG77_CHLRE	Sulfiredoxin	5e-13	tr|D8TT62|D8TT62_VOLCA	4e-37	scaffold5.g713.t1	3e-34	scaffold5_size2028652	2e-21
I0YM57_9CHLO	Alpha/beta-hydrolase	oligopeptidase B	P:protein metabolic process; F:hydrolase activity	EC:3.4.21	IPR002470 (PRINTS); IPR029058 (G3DSA:3.40.50.GENE3D); IPR023302 (G3DSA:2.130.10.GENE3D); IPR001375 (PFAM); IPR023302 (PFAM); IPR002470 (PANTHER); PTHR11757:SF12 (PANTHER); SSF50993 (SUPERFAMILY); IPR029058 (SUPERFAMILY)	tr|A8IQU9|A8IQU9_CHLRE	Oligopeptidase (Fragment)	7e-30	tr|D8TR92|D8TR92_VOLCA	4e-52	scaffold2.g7435.t1	3e-56	scaffold5_size2028652	4e-17
I0YM58_9CHLO	Uncharacterized protein	Peptidyl-prolyl cis-trans isomerase E	F:nucleotide binding; F:nucleic acid binding; F:catalytic activity; P:cellular protein modification process	EC:5.2.1.8	IPR000504 (SMART); IPR012677 (G3DSA:3.30.70.GENE3D); IPR000504 (PFAM); PTHR11071:SF274 (PANTHER); IPR024936 (PANTHER); IPR000504 (PROSITE_PROFILES); IPR012677 (SUPERFAMILY)	tr|A8J2F0|A8J2F0_CHLRE	Nuclear cap-binding protein (Fragment)	9e-69	tr|D8TJK3|D8TJK3_VOLCA	8e-66	scaffold8.g1610.t1	2e-67	scaffold8_size1730130	8e-16
I0YM59_9CHLO	WD40 repeat-like protein (Fragment)	WD40 repeat partial	F:protein binding; P:cellular process		IPR001680 (SMART); IPR015943 (G3DSA:2.130.10.GENE3D); IPR001680 (PFAM); IPR011042 (G3DSA:2.120.10.GENE3D); PTHR32215 (PANTHER); IPR017986 (PROSITE_PROFILES); IPR001680 (PROSITE_PROFILES); SSF82171 (SUPERFAMILY); IPR011047 (SUPERFAMILY)	tr|A8JEQ4|A8JEQ4_CHLRE	Flagellar associated protein	0	tr|D8U0V7|D8U0V7_VOLCA	7e-62	scaffold12.g7960.t1	1e-169	scaffold12_size2011427	4e-57
I0YM62_9CHLO	Kinase-like protein (Fragment)	sulfur stress regulator	F:nucleotide binding; C:nucleus; C:cytoplasm; P:signal transduction; P:cellular protein modification process; F:kinase activity	EC:2.7.11	PIRSF000654 (PIRSF); IPR000719 (SMART); G3DSA:3.30.200.20 (GENE3D); G3DSA:1.10.510.10 (GENE3D); IPR000719 (PFAM); PTHR24343 (PANTHER); IPR000719 (PROSITE_PROFILES); IPR011009 (SUPERFAMILY)	tr|Q9ZSM9|Q9ZSM9_CHLRE	Snf1-like protein kinase	4e-131	tr|D8TNP5|D8TNP5_VOLCA	6e-134	scaffold5.g965.t1	2e-110	scaffold1_size3450625	5e-36
I0YM63_9CHLO	NLI interacting factor (Fragment)	NLI interacting partial	P:cellular protein modification process; F:hydrolase activity	EC:3.1.3.16; EC:3.1; EC:3.1.3.41	IPR004274 (SMART); IPR011948 (TIGRFAM); IPR023214 (G3DSA:3.40.50.GENE3D); IPR004274 (PFAM); PTHR12210:SF29 (PANTHER); PTHR12210 (PANTHER); IPR004274 (PROSITE_PROFILES); IPR023214 (SUPERFAMILY)	tr|A8J274|A8J274_CHLRE	Predicted protein	2e-86	tr|D8TJQ7|D8TJQ7_VOLCA	1e-89	scaffold5.g730.t1	4e-79	scaffold5_size2028652	2e-21
I0YM64_9CHLO	WD40 repeat-like protein	periodic tryptophan 2 homolog	F:protein binding		IPR020472 (PRINTS); IPR001680 (SMART); IPR015943 (G3DSA:2.130.10.GENE3D); IPR007148 (PFAM); IPR015943 (G3DSA:2.130.10.GENE3D); IPR001680 (PFAM); IPR027145 (PANTHER); IPR001680 (PROSITE_PROFILES); IPR017986 (PROSITE_PROFILES); IPR011047 (SUPERFAMILY); SSF82171 (SUPERFAMILY); IPR017986 (SUPERFAMILY)	tr|Q6PLP8|Q6PLP8_CHLRE	Putative uncharacterized protein (Fragment)	0	tr|D8UH33|D8UH33_VOLCA	0	scaffold5.g735.t1	1e-174	scaffold5_size2028652	2e-23
I0YM65_9CHLO	JmjC-domain-containing protein	Jumonji domain-containing	F:DNA binding; C:nucleus		IPR003347 (SMART); IPR003349 (SMART); IPR003349 (PFAM); IPR003347 (PFAM); PTHR10694:SF7 (PANTHER); PTHR10694 (PANTHER); IPR003347 (PROSITE_PROFILES); IPR003349 (PROSITE_PROFILES); SSF51197 (SUPERFAMILY)	tr|A8IAF5|A8IAF5_CHLRE	Jumonji protein (Fragment)	3e-128	tr|D8U859|D8U859_VOLCA	2e-143	scaffold5.g860.t1	4e-123	scaffold5_size2028652	6e-24
I0YM66_9CHLO	Dehydroascorbate reductase	dehydroascorbate reductase	F:protein binding; C:cytoplasm; F:catalytic activity; P:metabolic process; P:cellular process		IPR004045 (PFAM); IPR010987 (G3DSA:1.20.1050.GENE3D); PF13410 (PFAM); IPR012336 (G3DSA:3.40.30.GENE3D); PTHR11260 (PANTHER); PTHR11260:SF171 (PANTHER); IPR004045 (PROSITE_PROFILES); IPR010987 (PROSITE_PROFILES); IPR010987 (SUPERFAMILY); IPR012336 (SUPERFAMILY)	tr|A8I0K9|A8I0K9_CHLRE	Dehydroascorbate reductase	6e-49	tr|D8TYM3|D8TYM3_VOLCA	3e-43	scaffold5.g793.t1	7e-50	scaffold32_size168507	8e-16
I0YM67_9CHLO	TBP-domain-containing protein	TATA-box-binding -like	C:nucleus; F:DNA binding; P:biosynthetic process; P:nucleobase-containing compound metabolic process		IPR000814 (PRINTS); IPR012295 (G3DSA:3.30.310.GENE3D); IPR000814 (PFAM); IPR000814 (PANTHER); IPR000814 (HAMAP); SSF55945 (SUPERFAMILY); SSF55945 (SUPERFAMILY)	tr|A8IJX8|A8IJX8_CHLRE	Global transcription factor	5e-110	tr|Q5S251|Q5S251_VOLCA	6e-105	scaffold5.g792.t1	3e-97	scaffold5_size2028652	3e-29
I0YM68_9CHLO	Uncharacterized protein	cobyrinic acid a,c-diamide synthase	C:cell; F:binding; P:transport		G3DSA:3.40.50.1980 (GENE3D); PTHR30535 (PANTHER); PTHR30535:SF2 (PANTHER); IPR002491 (PROSITE_PROFILES); SSF53807 (SUPERFAMILY)	tr|A8J5W0|A8J5W0_CHLRE	Predicted protein (Fragment)	7e-28	tr|D8UHJ1|D8UHJ1_VOLCA	3e-28	scaffold5.g875.t1	2e-38	scaffold5_size2028652	8e-13
I0YM69_9CHLO	Cobyrinic acid a,c-diamide synthase	cobyrinic acid a,c-diamide synthase	P:biosynthetic process; P:cellular process; F:hydrolase activity		IPR002586 (PFAM); IPR011698 (PFAM); IPR029062 (G3DSA:3.40.50.GENE3D); IPR004484 (TIGRFAM); IPR027417 (G3DSA:3.40.50.GENE3D); PTHR21343 (PANTHER); PTHR21343:SF6 (PANTHER); IPR017929 (PROSITE_PROFILES); IPR029062 (SUPERFAMILY); IPR027417 (SUPERFAMILY)	tr|A8J5W1|A8J5W1_CHLRE	Predicted protein (Fragment)	1e-22	tr|D8UHJ1|D8UHJ1_VOLCA	7e-27	scaffold5.g875.t1	1e-118	scaffold5_size2028652	2e-31
I0YM71_9CHLO	Uncharacterized protein	E3 ubiquitin- ligase RKP-like	F:protein binding; P:catabolic process; P:cellular protein modification process; F:transferase activity; C:intracellular		IPR003613 (SMART); IPR003877 (SMART); IPR003877 (PFAM); IPR013083 (G3DSA:3.30.40.GENE3D); IPR019474 (PFAM); IPR003613 (PFAM); PTHR13363:SF1 (PANTHER); PTHR13363 (PANTHER); PS51257 (PROSITE_PROFILES); IPR001870 (PROSITE_PROFILES); IPR003613 (PROSITE_PROFILES); IPR013320 (SUPERFAMILY); SSF57850 (SUPERFAMILY)	tr|A8J644|A8J644_CHLRE	Predicted protein (Fragment)	4e-49	tr|D8TNY1|D8TNY1_VOLCA	1e-52	scaffold5.g718.t1	1e-41	scaffold5_size2028652	1e-11
I0YM73_9CHLO	Calcium-transporting ATPase	calcium-translocating P-type ATPase	F:nucleotide binding; C:cytoplasm; C:endoplasmic reticulum; C:plasma membrane; F:transporter activity; F:hydrolase activity	EC:3.6.1; EC:3.6.1.3; EC:3.6.3.8; EC:3.6.1.15	IPR001757 (PRINTS); PR00119 (PRINTS); IPR004014 (SMART); IPR006408 (TIGRFAM); IPR023299 (G3DSA:3.40.1110.GENE3D); IPR008250 (PFAM); IPR023298 (G3DSA:1.20.1110.GENE3D); IPR004014 (PFAM); PF00702 (PFAM); IPR006068 (PFAM); IPR001757 (TIGRFAM); PTHR24093:SF339 (PANTHER); PTHR24093 (PANTHER); SSF81653 (SUPERFAMILY); IPR023299 (SUPERFAMILY); IPR023214 (SUPERFAMILY); SSF81665 (SUPERFAMILY)	tr|A8IJV9|A8IJV9_CHLRE	Calcium-transporting ATPase	0	tr|D8TNZ5|D8TNZ5_VOLCA	0	scaffold5.g717.t1	0	scaffold5_size2028652	6e-33
I0YM74_9CHLO	Uncharacterized protein	E3 ubiquitin- ligase At3g02290-like	F:protein binding		IPR001841 (SMART); IPR024766 (PFAM); IPR013083 (G3DSA:3.30.40.GENE3D); PTHR22763:SF34 (PANTHER); PTHR22763 (PANTHER); IPR001841 (PROSITE_PROFILES); SSF57850 (SUPERFAMILY)	tr|A8JET6|A8JET6_CHLRE	Predicted protein (Fragment)	3e-21	tr|D8UHE4|D8UHE4_VOLCA	5e-19	scaffold12.g8145.t1	8e-16	scaffold12_size2011427	3e-06
I0YM75_9CHLO	Mitochondrial carrier	mitochondrial carrier	C:membrane; C:mitochondrion; P:transport		IPR002030 (PRINTS); IPR023395 (G3DSA:1.50.40.GENE3D); IPR018108 (PFAM); PTHR24089:SF80 (PANTHER); PTHR24089 (PANTHER); IPR018108 (PROSITE_PROFILES); IPR023395 (SUPERFAMILY)	tr|A8JHJ5|A8JHJ5_CHLRE	Predicted protein	3e-82	tr|D8UA51|D8UA51_VOLCA	1e-79	scaffold3.g6288.t1	2e-30	scaffold12_size2011427	1e-11
I0YM76_9CHLO	UPF0016-domain-containing protein (Fragment)	GDT1 chloroplastic	P:generation of precursor metabolites and energy; C:membrane; P:cellular component organization; P:photosynthesis; C:plastid; F:transporter activity; C:thylakoid		IPR001727 (PFAM); PTHR12608:SF6 (PANTHER); IPR001727 (PANTHER)	tr|A8I8C6|A8I8C6_CHLRE	Predicted protein	5e-81	tr|D8U4K6|D8U4K6_VOLCA	9e-78	scaffold12.g8148.t1	3e-79	scaffold12_size2011427	7e-33
I0YM77_9CHLO	Uncharacterized protein	homogentisate phytyltransferase chloroplastic	C:membrane; F:transferase activity	EC:2.5.1	IPR000537 (PFAM); PTHR11048:SF26 (PANTHER); PTHR11048 (PANTHER)	tr|A0A078LN07|A0A078LN07_CHLRE	Homogentisate phytyltransferase	6e-79	tr|D8UDK8|D8UDK8_VOLCA	2e-68	scaffold12.g8147.t1	6e-103	scaffold12_size2011427	1e-33
I0YM78_9CHLO	Uncharacterized protein	Vam6 Vps39	F:nucleotide binding; F:protein binding; C:membrane; P:cellular protein modification process; P:cellular component organization; F:kinase activity; P:transport; C:intracellular		IPR019452 (PFAM); IPR011990 (G3DSA:1.25.40.GENE3D); IPR000719 (PFAM); IPR019453 (PFAM); IPR001180 (PFAM); G3DSA:1.10.510.10 (GENE3D); IPR032914 (PTHR12894:PANTHER); PTHR12894 (PANTHER); IPR000547 (PROSITE_PROFILES); IPR001180 (PROSITE_PROFILES); IPR011009 (SUPERFAMILY)	tr|A8J956|A8J956_CHLRE	Subunit of VPS-C complex	2e-43	tr|D8THQ9|D8THQ9_VOLCA	1e-80	scaffold2.g7505.t1	1e-86	scaffold2_size3998120	9e-12
I0YM80_9CHLO	DnaJ-domain-containing protein	dnaJ homolog subfamily B member 9-like	F:protein binding; C:membrane; P:cellular process		IPR001623 (PRINTS); IPR001623 (SMART); IPR001623 (PFAM); IPR001623 (G3DSA:1.10.287.GENE3D); PTHR24078 (PANTHER); IPR001623 (PROSITE_PROFILES); IPR001623 (SUPERFAMILY)	tr|A8HQN4|A8HQN4_CHLRE	DnaJ-like protein	2e-13	tr|D8U022|D8U022_VOLCA	6e-12	scaffold5.g1003.t1	6e-17	scaffold5_size2028652	2e-16
I0YM81_9CHLO	ABC1-domain-containing protein	unusual kinase (ISS)	F:ATP binding; F:protein kinase activity; P:protein phosphorylation		IPR004147 (PFAM); PTHR10566:SF86 (PANTHER); PTHR10566 (PANTHER); IPR011009 (SUPERFAMILY)	tr|A8J9R1|A8J9R1_CHLRE	ABC1/COQ8 ser/thr kinase	2e-102	tr|D8U214|D8U214_VOLCA	5e-166	scaffold13.g183.t1	2e-105	scaffold8_size1730130	6e-26
I0YM85_9CHLO	Uncharacterized protein	c transferase	C:membrane		IPR021067 (PFAM); PTHR34496 (PANTHER); PTHR34496:SF1 (PANTHER); IPR029044 (SUPERFAMILY)	tr|A8JA99|A8JA99_CHLRE	Predicted protein	2e-26	tr|D8U2E5|D8U2E5_VOLCA	9e-43	scaffold1.g5631.t1	6e-22	scaffold1_size3450625	2e-18
I0YM88_9CHLO	WD40 repeat-like protein	WD40 repeat	F:protein binding		IPR001680 (SMART); IPR015943 (G3DSA:2.130.10.GENE3D); IPR001680 (PFAM); PTHR22836 (PANTHER); IPR001680 (PROSITE_PROFILES); IPR017986 (PROSITE_PROFILES); IPR017986 (SUPERFAMILY)	tr|D5LAY9|D5LAY9_CHLRE	PSF2m	3e-95	tr|D9CJ11|D9CJ11_VOLCA	9e-82	scaffold6.g2688.t1	3e-101	scaffold6_size1922994	1e-18
I0YM91_9CHLO	Uncharacterized protein	WD repeat-containing 19	P:embryo development; C:cell; F:protein binding; P:cellular component organization; P:anatomical structure morphogenesis		IPR015943 (G3DSA:2.130.10.GENE3D); PTHR14920:SF0 (PANTHER); PTHR14920 (PANTHER); IPR017986 (SUPERFAMILY)	tr|A9XPA7|A9XPA7_CHLRE	Intraflagellar transport protein 144	7e-19	tr|D8TSC2|D8TSC2_VOLCA	3e-25			scaffold30_size250005	4e-10
I0YM93_9CHLO	Uncharacterized protein	DENN domain-containing 1B			IPR001194 (SMART); IPR001194 (PFAM); PTHR13196:SF14 (PANTHER); PTHR13196 (PANTHER); IPR001194 (PROSITE_PROFILES); IPR005113 (PROSITE_PROFILES)	tr|A8IKU4|A8IKU4_CHLRE	Predicted protein (Fragment)	1e-48	tr|D8TP94|D8TP94_VOLCA	2e-53	scaffold5.g741.t1	3e-52	scaffold5_size2028652	8e-08
I0YM95_9CHLO	rRNA adenine N(6)-methyltransferase (Fragment)	probable dimethyladenosine transferase	F:transferase activity; P:nucleobase-containing compound metabolic process	EC:2.1.1	IPR020598 (SMART); IPR011530 (TIGRFAM); IPR023165 (G3DSA:1.10.8.GENE3D); IPR001737 (PFAM); IPR029063 (G3DSA:3.40.50.GENE3D); IPR001737 (PANTHER); IPR001737 (PROSITE_PROFILES); IPR029063 (SUPERFAMILY)	tr|A8HMQ7|A8HMQ7_CHLRE	rRNA adenine N(6)-methyltransferase	1e-17	tr|D8TKG8|D8TKG8_VOLCA	1e-40	scaffold30.g4463.t1	3e-16	scaffold30_size250005	2e-06
I0YM99_9CHLO	Nicastrin-domain-containing protein	nicastrin	P:protein metabolic process; C:cytoplasm; C:membrane		G3DSA:3.40.630.10 (GENE3D); IPR008710 (PFAM); PTHR21092:SF0 (PANTHER); IPR008710 (PANTHER); SSF53187 (SUPERFAMILY)	tr|A8JFJ5|A8JFJ5_CHLRE	Nicastrin	3e-96	tr|D8TN23|D8TN23_VOLCA	1e-75	scaffold7.g3619.t1	3e-44	scaffold7_size1837125	2e-28
I0YMA1_9CHLO	Amino acid transporter	dicarboxylate amino acid cation sodium transporter	C:membrane; F:transporter activity		IPR001991 (PRINTS); IPR001991 (PFAM); IPR001991 (G3DSA:1.10.3860.GENE3D); IPR001991 (PANTHER); IPR001991 (SUPERFAMILY)	tr|A8I0J4|A8I0J4_CHLRE	Amino acid transporter	9e-148	tr|D8TYR9|D8TYR9_VOLCA	2e-139	scaffold14.g1057.t1	1e-129	scaffold14_size1568905	2e-14
I0YMA3_9CHLO	Mg2+ transporter protein (Fragment)	magnesium transporter MRS2-7	C:membrane		PTHR13890 (PANTHER)	tr|A8I4S8|A8I4S8_CHLRE	Mg2+ transporter protein, CorA-like protein	5e-45	tr|D8TZ78|D8TZ78_VOLCA	8e-49	scaffold20.g7871.t1	2e-45	scaffold3_size2545224	2e-18
I0YMA8_9CHLO	Glyceraldehyde-3-phosphate dehydrogenase	Glyceraldehyde-3-phosphate dehydrogenase chloroplastic	F:nucleotide binding; P:carbohydrate metabolic process; F:catalytic activity		IPR020831 (PRINTS); IPR020828 (SMART); IPR020831 (PIRSF); G3DSA:3.30.360.10 (GENE3D); IPR020828 (PFAM); IPR020829 (PFAM); IPR006424 (TIGRFAM); IPR016040 (G3DSA:3.40.50.GENE3D); PTHR10836:SF38 (PANTHER); IPR020831 (PANTHER); IPR016040 (SUPERFAMILY); SSF55347 (SUPERFAMILY)	tr|A8HP84|A8HP84_CHLRE	Glyceraldehyde-3-phosphate dehydrogenase	0	tr|D8U9J4|D8U9J4_VOLCA	0	scaffold12.g8190.t1	0	scaffold12_size2011427	4e-29
I0YMB0_9CHLO	Tryptophan synthase	tryptophan synthase beta chain 1	C:cytoplasm; F:catalytic activity; P:biosynthetic process; F:binding; P:cellular process	EC:4.2.1.20	IPR023026 (PIRSF); IPR001926 (PFAM); IPR006654 (TIGRFAM); G3DSA:3.40.50.1100 (GENE3D); G3DSA:3.40.50.1100 (GENE3D); PTHR10314:SF98 (PANTHER); PTHR10314 (PANTHER); IPR023026 (HAMAP); IPR001926 (SUPERFAMILY)	tr|A8IFZ9|A8IFZ9_CHLRE	Tryptophan synthase beta subunit	0	tr|D8U5X6|D8U5X6_VOLCA	0	scaffold2.g7375.t1	5e-162	scaffold2_size3998120	4e-25
I0YMB1_9CHLO	NaCl-inducible protein	NaCl-inducible protein			no IPS match	tr|A8JGR1|A8JGR1_CHLRE	NaCl-inducible protein	5e-15	tr|D8UAD6|D8UAD6_VOLCA	3e-12
I0YMB2_9CHLO	Putative 26S proteasome regulatory subunit	26S proteasome non-ATPase regulatory subunit 12	C:nucleus; P:protein metabolic process; F:protein binding; C:cytoplasm; P:catabolic process; P:cellular process		IPR000717 (SMART); SM00753 (SMART); IPR000717 (PFAM); IPR011991 (G3DSA:1.10.10.GENE3D); PTHR10855 (PANTHER); PTHR10855:SF1 (PANTHER); IPR011991 (SUPERFAMILY)	tr|A8IUN8|A8IUN8_CHLRE	Predicted protein	2e-110	tr|D8U0Y3|D8U0Y3_VOLCA	0	scaffold14.g1021.t1	5e-139	scaffold14_size1568905	6e-17
I0YMB4_9CHLO	Zf-AN1-domain-containing protein	zinc finger A20 and AN1 domain-containing stress-associated 6-like	F:DNA binding		IPR002653 (SMART); IPR000058 (SMART); IPR002653 (PFAM); IPR000058 (G3DSA:4.10.1110.GENE3D); IPR000058 (PFAM); PTHR10634 (PANTHER); IPR002653 (PROSITE_PROFILES); IPR000058 (PROSITE_PROFILES); SSF57716 (SUPERFAMILY); SSF118310 (SUPERFAMILY)	tr|A8J1F9|A8J1F9_CHLRE	Zinc finger protein, major isoform	4e-38	tr|D8U9B5|D8U9B5_VOLCA	1e-31	scaffold14.g1069.t1	2e-26	scaffold14_size1568905	7e-11
I0YMB6_9CHLO	Cytochrome c oxidase subunit H	cytochrome c oxidase subunit H	P:generation of precursor metabolites and energy; F:catalytic activity; C:mitochondrion; C:membrane; P:nucleobase-containing compound metabolic process; F:transporter activity	EC:1.9.3.1	IPR003213 (G3DSA:1.10.10.GENE3D); IPR003213 (PFAM); PTHR11387:SF19 (PANTHER); PTHR11387 (PANTHER); PD015172 (PRODOM); IPR003213 (SUPERFAMILY)	tr|A8IN92|A8IN92_CHLRE	Mitochondrial cytochrome c oxidase subunit	1e-32	tr|D8TLU1|D8TLU1_VOLCA	9e-30	scaffold15.g4354.t1	1e-25
I0YMB7_9CHLO	TPT-domain-containing protein	UDP-galactose transporter 2-like	C:cytoplasm; C:membrane; F:transporter activity		IPR004853 (PFAM); PTHR11132:SF132 (PANTHER); PTHR11132 (PANTHER); SSF103481 (SUPERFAMILY)	tr|A8J762|A8J762_CHLRE	Predicted protein (Fragment)	2e-105	tr|D8UEN1|D8UEN1_VOLCA	6e-110	scaffold14.g1318.t1	2e-105	scaffold14_size1568905	9e-24
I0YMB8_9CHLO	Uncharacterized protein	diacylglycerol Oacyltransferase	C:membrane; F:transferase activity		IPR007130 (PFAM); PTHR12317 (PANTHER); PTHR12317:SF32 (PANTHER)	tr|A8J110|A8J110_CHLRE	Diacylglycerol acyltransferase type 2	3e-48	tr|D8TL45|D8TL45_VOLCA	3e-49	scaffold13.g400.t1	1e-23
I0YMC3_9CHLO	DNA repair helicase	Fanconi anemia group J	F:nucleotide binding; C:nucleus; F:DNA binding; P:cellular component organization; P:nucleobase-containing compound metabolic process; F:hydrolase activity	EC:3.6.1; EC:3.6.1.3; EC:3.6.1.15	IPR006555 (SMART); IPR006554 (SMART); IPR027417 (G3DSA:3.40.50.GENE3D); IPR010614 (PFAM); IPR013020 (TIGRFAM); IPR006555 (PFAM); PTHR11472 (PANTHER); PTHR11472:SF6 (PANTHER); IPR014013 (PROSITE_PROFILES); IPR027417 (SUPERFAMILY)	tr|A8J018|A8J018_CHLRE	ATP-dependent DNA helicase	5e-135	tr|D8U962|D8U962_VOLCA	8e-89	scaffold14.g1034.t1	3e-162	scaffold14_size1568905	3e-08
I0YMC4_9CHLO	Uncharacterized protein	tRNA threonylcarbamoyladenosine dehydratase 2-like isoform X1	F:catalytic activity; C:membrane; C:cytosol; P:nucleobase-containing compound metabolic process; C:plastid		IPR003344 (G3DSA:2.60.40.GENE3D); IPR016040 (G3DSA:3.40.50.GENE3D); IPR009091 (G3DSA:2.130.10.GENE3D); IPR000594 (PFAM); PTHR10953:SF135 (PANTHER); PTHR10953 (PANTHER); IPR008964 (SUPERFAMILY); IPR009091 (SUPERFAMILY); IPR000594 (SUPERFAMILY)	tr|A8J7E9|A8J7E9_CHLRE	Putative uncharacterized protein (Fragment)	4e-145	tr|D8UJ05|D8UJ05_VOLCA	1e-163	scaffold14.g1035.t1	9e-119	scaffold14_size1568905	4e-13
I0YMC6_9CHLO	Uncharacterized protein	hypothetical protein COCSUDRAFT_58293			PTHR33129 (PANTHER)	tr|A8JK22|A8JK22_CHLRE	Predicted protein (Fragment)	1e-13	tr|D8UL14|D8UL14_VOLCA	7e-23
I0YMC7_9CHLO	Uncharacterized protein	hypothetical protein COCSUDRAFT_58294			IPR019366 (PFAM); PTHR21547:SF0 (PANTHER); IPR019366 (PANTHER)	tr|A8J6F1|A8J6F1_CHLRE	Flagellar associated protein, qilin-like protein	2e-22	tr|D8U506|D8U506_VOLCA	6e-24
[truncated: 4,833 more rows]
