# Supplementary material for: Metabolic co-dependence drives the evolutionarily ancient Hydra–Chlorella symbiosis
Source: eLife. 2018 May 31;7:e35122. doi: 10.7554/eLife.35122 (PMC6019070; doi:10.7554/eLife.35122)
Supplement: Supplementary file 7. [file elife-35122-supp7.docx]

**Supplementary File 7**

Composition of modified Bold’s Basal Medium for 1 liter (pH. 7)

| KH2PO4 | 175 mg |
| --- | --- |
| K2HPO4 | 100 mg |
| MgSO4 · 7H2O | 75 mg |
| CaCl2 · 2H2O | 25 mg |
| NaCl | 25 mg |
| FeSO4 · 7H2O, H2SO4 | 5.0 mg, 1ul |
| Na2EDTA, KOH | 50 mg, 31 mg |
| H3BO3 | 11.4 mg |
| ZnSO4 · 7H2O | 8.8 mg |
| MnCl2 · 7H2O | 1.4 mg |
| MoO3 | 0.7 mg |
| CuSO4 · 5H2O | 1.6 mg |
| Co(NO3)2 · 6H2O | 0.5 mg |
| glucose | 5 g |
| Vitamine B1 (Thiaminhydrochloride) | 1.2 mg |
| Vitamine B12 (Cyanocobalamin) | 0.01 mg |

Nitrogen Components

| NaNO3 | 250 mg |
| --- | --- |
| NH4Cl | 155 mg |
| Glutamine | 426 mg |
| Casamino acids | 426 mg |
